# Supplementary material for: Catalytic asymmetric inverse-electron-demand aza-Diels–Alder reaction of 1,3-diazadienes with 3-vinylindoles
Source: Royal Society of Chemistry journal article supplement (doi:10.1039/d2cc02458f), 2022-01-01

## *Supplementary Information*

### **Catalytic asymmetric inverse-electron-demand aza-Diels–Alder reaction of 1,3-diazadienes with 3-vinylindoles**

Yu-Hang Miao, Yuan-Zhao Hua,\* Hao-Jie Gao, Nan-Nan Mo, Min-Can Wang,\* and Guang-Jian Mei\*

Green Catalysis Center, and College of Chemistry, Zhengzhou University, Zhengzhou 450001,  
China.

*E-mail:* [hyzh@gs.zzu.edu.cn](mailto:hyzh@gs.zzu.edu.cn); [wangmincan@zzu.edu.cn](mailto:wangmincan@zzu.edu.cn); [meigj@zzu.edu.cn](mailto:meigj@zzu.edu.cn).

## **Contents**

|                                                                      |           |
|----------------------------------------------------------------------|-----------|
| <b>1. General Information.....</b>                                   | <b>2</b>  |
| <b>2. General Procedures for the Synthesis of Isothiourea 3.....</b> | <b>3</b>  |
| <b>3. Synthesis of Isothiourea 4.....</b>                            | <b>4</b>  |
| <b>4. Characterization of benzothiazolopyrimidines.....</b>          | <b>5</b>  |
| <b>5. Crystallographic data collection for compound 3oa.....</b>     | <b>23</b> |
| <b>6. HPLC spectra of compounds.....</b>                             | <b>25</b> |
| <b>7. NMR Spectra of compounds.....</b>                              | <b>70</b> |

---

## 1. General Information.

All reactions were carried out in oven-dried glassware with magnetic stirring. Reagents were obtained from commercial supplier and used without further purification unless otherwise noted. Solvents were dried with standard methods and freshly distilled prior to use if needed. All reactions sensitive to air or moisture were carried out under nitrogen using standard Schlenk and vacuum line techniques. NMR spectra were recorded on a 400 MHz NMR spectrometer with  $d_6$ -DMSO as the solvent and TMS as an internal standard (400 MHz for  $^1\text{H}$  and 100 MHz for  $^{13}\text{C}$ ). HRMS were determined on a Q-TOF Micro LC/MS System ESI spectrometer. Enantiomeric excesses values were determined with HPLC (chiral column; mobile phase hexane/*i*-PrOH).

## 2. General Procedures for the Synthesis of Isothiourea **3**.

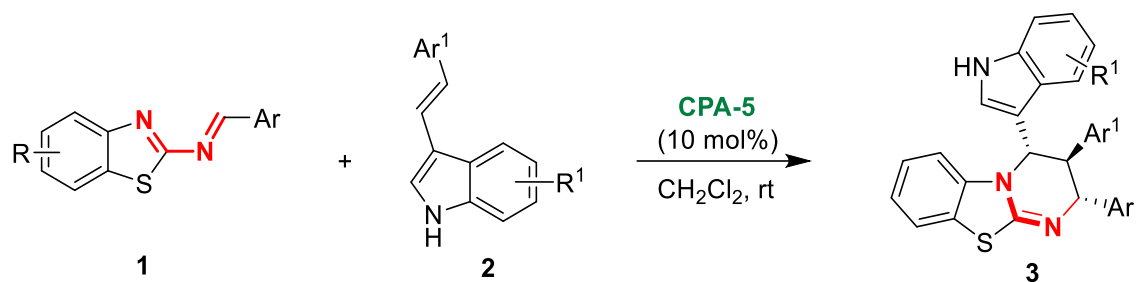

To a solution of imine **1** (1 equiv) and catalyst CPA-5 (10 mol%) in dry DCM (1 mL), was added the 3-vinylindole **2** (1 equiv) in one portion. The reaction mixture was stirred for 12 h at rt. After completion (monitored by TLC), the solvent was removed under reduced pressure and the crude product was directly purified by flash chromatography on silica gel employing mixtures of DCM and ethyl acetate as eluents to afford the desired product **3**.

### 3. Synthesis of Isothiourea 4.

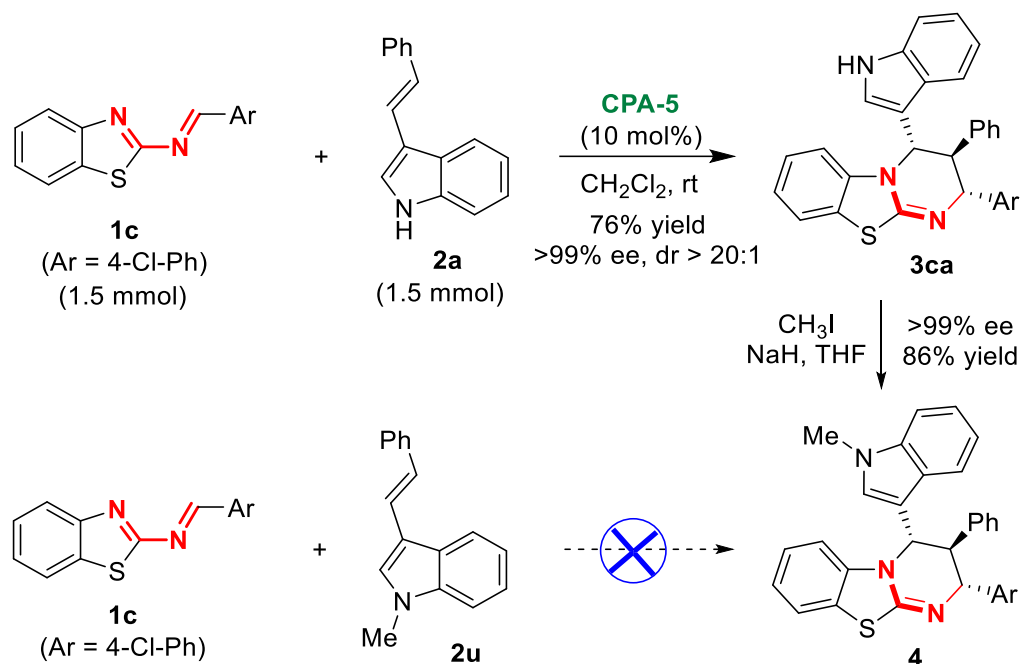

To a solution of imine **1c** (1.5 mol) and catalyst CPA-5 (10 mol%) in dry DCM (0.1 M), was added the 3-vinylindole **2a** (1 equiv) in one portion. The reaction mixture was stirred for 24 h at rt. After completion (monitored by TLC), the solvent was removed under reduced pressure and the crude product was directly purified by flash chromatography on silica gel employing mixtures of DCM and ethyl acetate as eluents to afford the desired product **3ca**.

To a solution of **3ca** (0.1 mmol) in dry THF (0.1 M) at 0 °C was added NaH (0.12 mmol, 1.2 equiv). Reaction was stirred for 30 min. Then, add of CH<sub>3</sub>I (0.12 mol, 1.2 equiv). The solution was stirred at rt for the necessary reaction time, and then quenched with aqueous NH<sub>4</sub>Cl (5 mL), and extracted three times with ethyl acetate (3×5 mL). The combined organics was washed with brine before being dried by MgSO<sub>4</sub>, filtered and concentrated in vacuo. The crude product was separated by flash column chromatography on silica gel (petroleum ether/ethyl acetate 5:1–2:1) to afford a compound **4** as a white solid.

#### 4. Characterization of benzothiazolopyrimidines.

(2*R*,3*S*,4*S*)-4-(1*H*-indol-3-yl)-2,3-diphenyl-3,4-dihydro-2*H*-benzo[4,5]thiazolo[3,2-*a*]pyrimidine **3aa**:

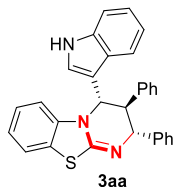

White solid, M.p.: 161-162 °C; yield: 65%;  $[\alpha]_D^{20} = +26$  (*c* 0.1, CH<sub>2</sub>Cl<sub>2</sub>); HPLC (Chiralpak ID, *i*-propanol/hexane = 10/90, flow rate 1.0 mL/min,  $\lambda = 254$  nm), *t*<sub>1</sub> = 18.75 min (major), *t*<sub>2</sub> = 21.58 min (minor), ee = 96%; <sup>1</sup>H NMR (400 M, d<sub>6</sub>-DMSO)  $\delta$  ppm: 10.81 (s, 1H), 7.46-7.42 (m, 1H), 7.38-7.30 (m, 1H), 7.25-7.19 (m, 1H), 7.12-6.98 (m, 9H), 6.96-6.61 (m, 6H), 6.56 (d, *J* = 7.3 Hz, 1H), 5.70 (d, *J* = 10.0 Hz, 1H), 4.84 (d, *J* = 10.3 Hz, 1H), 3.22 (t, *J* = 10.2 Hz, 1H); <sup>13</sup>C NMR (100 MHz, d<sub>6</sub>-DMSO)  $\delta$  ppm: 157.8, 143.9, 140.5, 136.8, 129.2, 128.3, 128.1, 127.9, 126.8, 126.7, 125.7, 125.5, 125.0, 122.2, 122.1, 121.8, 121.5, 119.5, 118.2, 112.4, 112.0, 111.5, 64.7, 58.0, 53.6; HRMS (ESI) Calcd. For C<sub>30</sub>H<sub>24</sub>N<sub>3</sub>S [M+H]<sup>+</sup> 458.1685, found 458.1688.

(2*R*,3*S*,4*S*)-2-(4-fluorophenyl)-4-(1*H*-indol-3-yl)-3-phenyl-3,4-dihydro-2*H*-benzo[4,5]thiazolo[3,2-*a*]pyrimidine **3ba**:

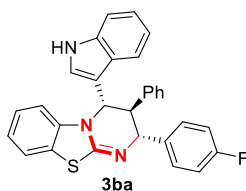

White solid, M.p.: 182-183 °C; yield: 74%;  $[\alpha]_D^{20} = +121$  (*c* 0.23, CH<sub>2</sub>Cl<sub>2</sub>); HPLC (Chiralpak ID, *i*-propanol/hexane = 8/92, flow rate 1.0 mL/min,  $\lambda = 254$  nm), *t*<sub>1</sub> = 33.64 min (minor), *t*<sub>2</sub> = 36.96 min (major), ee = >99%; <sup>1</sup>H NMR (400 M, d<sub>6</sub>-DMSO)  $\delta$  ppm: 10.82 (s, 1H), 7.44-7.41 (m, 1H), 7.30 (d, *J* = 7.8 Hz, 1H), 7.24 (d, *J* = 8.0 Hz, 1H), 7.06-6.95 (m, 7H), 6.91-6.77 (m, 7H), 6.55 (d, *J* = 7.2 Hz, 1H), 5.71 (d, *J* = 10.0 Hz, 1H), 4.85 (d, *J* = 10.2 Hz, 1H), 3.18 (t, *J* = 10.1 Hz, 1H); <sup>13</sup>C NMR (100 MHz, d<sub>6</sub>-DMSO)  $\delta$  ppm: 161.1 (d, *J* = 240.2 Hz), 157.9, 140.5, 140.4, 140.1 (d, *J* = 2.8 Hz), 136.8, 129.8 (d, *J* = 8.0 Hz), 129.2, 128.4, 126.9, 125.8, 125.5, 125.0, 122.2, 122.2, 121.8, 121.5, 119.5, 118.2, 114.6 (d, *J* = 21.0 Hz) 112.4, 112.1, 111.4, 63.9, 57.9, 53.8; <sup>19</sup>F NMR (376 MHz, d<sub>6</sub>-DMSO)  $\delta$  ppm: -111.98; HRMS (ESI) Calcd. For C<sub>30</sub>H<sub>23</sub>FN<sub>3</sub>S [M+H]<sup>+</sup> 476.1591, found 476.1595.

(2*R*,3*S*,4*S*)-2-(4-chlorophenyl)-4-(1*H*-indol-3-yl)-3-phenyl-3,4-dihydro-2*H*-benzo[4,5]thiazolo[3,2-*a*]pyrimidine **3ca**:

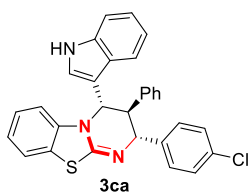

White solid, M.p.: 154-155 °C; yield: 76%;  $[\alpha]_D^{20} = +119$  (*c* 0.28, CH<sub>2</sub>Cl<sub>2</sub>); HPLC (Chiralpak ID, *i*-propanol/hexane = 10/90, flow rate 1.0 mL/min,  $\lambda = 254$  nm),  $t_1 = 26.81$  min (minor),  $t_2 = 29.00$  min (major), ee = >99%; <sup>1</sup>H NMR (400 M, d<sub>6</sub>-DMSO)  $\delta$  ppm: 10.83 (s, 1H), 7.44-7.41 (m, 1H), 7.37-7.24 (m, 2H), 7.19-7.07 (m, 2H), 7.05-6.96 (m, 7H), 6.92-6.78 (m, 5H), 6.56 (d, *J* = 7.4 Hz, 1H), 5.71 (d, *J* = 10.0 Hz, 1H), 4.86 (d, *J* = 10.2 Hz, 1H), 3.18 (t, *J* = 10.2 Hz, 1H); <sup>13</sup>C NMR (100 MHz, d<sub>6</sub>-DMSO)  $\delta$  ppm: 158.1, 142.9, 140.5, 140.2, 136.8, 131.1, 129.9, 129.2, 128.4, 127.9, 127.0, 125.8, 125.6, 125.0, 122.2, 121.9, 121.5, 119.6, 118.2, 112.4, 112.1, 111.3, 63.9, 57.9, 53.6; HRMS (ESI) Calcd. For C<sub>30</sub>H<sub>23</sub>ClN<sub>3</sub>S [M+H]<sup>+</sup> 492.1296, found 492.1299.

(2*R*,3*S*,4*S*)-2-(4-bromophenyl)-4-(1*H*-indol-3-yl)-3-phenyl-3,4-dihydro-2*H*-benzo[4,5]thiazolo[3,2-*a*]pyrimidine **3da**:

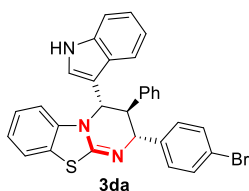

White solid, M.p.: 182-183 °C; yield: 70%;  $[\alpha]_D^{20} = +126$  (*c* 0.18, CH<sub>2</sub>Cl<sub>2</sub>); HPLC (Chiralpak ID, *i*-propanol/hexane = 10/90, flow rate 1.0 mL/min,  $\lambda = 254$  nm),  $t_1 = 28.64$  min (minor),  $t_2 = 32.26$  min (major), ee = 99%; <sup>1</sup>H NMR (400 M, d<sub>6</sub>-DMSO)  $\delta$  ppm: 10.82 (s, 1H), 7.44-7.42 (m, 1H), 7.30-7.23 (m, 4H), 7.07-7.02 (m, 3H), 6.99-6.95 (m, 4H), 6.91-6.76 (m, 5H), 6.55 (d, *J* = 7.3 Hz, 1H), 5.70 (d, *J* = 10.0 Hz, 1H), 4.85 (d, *J* = 10.3 Hz, 1H), 3.17 (t, *J* = 10.1 Hz, 1H); <sup>13</sup>C NMR (100 MHz, d<sub>6</sub>-DMSO)  $\delta$  ppm: 158.1, 143.4, 140.5, 140.3, 136.8, 130.8, 130.3, 129.2, 128.4, 127.0, 125.8, 125.0, 122.2, 122.2, 121.9, 121.5, 119.7, 119.5, 118.2, 112.4, 112.1, 111.3, 64.0, 57.9, 53.5; HRMS (ESI) Calcd. For C<sub>30</sub>H<sub>23</sub>BrN<sub>3</sub>S [M+H]<sup>+</sup> 536.0791, found 536.0795.

(2*R*,3*S*,4*S*)-4-(1*H*-indol-3-yl)-3-phenyl-2-(*p*-tolyl)-3,4-dihydro-2*H*-benzo[4,5]thiazolo[3,2-*a*]pyrimidine **3ea**:

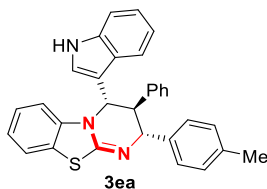

White solid, M.p.: 167-168 °C; yield: 60%;  $[\alpha]_D^{20} = +60$  (*c* 0.36, CH<sub>2</sub>Cl<sub>2</sub>); HPLC (Chiralpak IE, *i*-propanol/hexane = 20/80, flow rate 1.0 mL/min,  $\lambda = 254$  nm),  $t_1 = 12.00$  min (minor),  $t_2 = 13.02$  min (major), ee = 98%; <sup>1</sup>H NMR (400 M, d<sub>6</sub>-DMSO)  $\delta$  ppm: 10.83 (s, 1H), 7.43-7.41 (m, 1H), 7.32-7.24 (m, 2H), 7.03-6.88 (m, 10H), 6.82-6.77 (m, 4H), 6.55 (d, *J* = 7.0 Hz, 1H), 5.66 (d, *J* = 10.1 Hz, 1H), 4.80 (d, *J* = 10.4 Hz, 1H), 3.20

(t,  $J = 10.2$  Hz, 1H), 2.15 (s, 3H);  $^{13}\text{C}$  NMR (100 MHz,  $\text{d}_6\text{-DMSO}$ )  $\delta$  ppm: 157.7, 140.9, 140.6, 140.5, 136.8, 135.5, 129.3, 128.0, 126.8, 125.9, 125.7, 125.5, 125.0, 122.3, 122.1, 121.8, 121.5, 121.3, 119.5, 118.2, 112.4, 112.1, 111.5, 64.3, 58.1, 53.6, 21.1; HRMS (ESI) Calcd. For  $\text{C}_{31}\text{H}_{26}\text{N}_3\text{S}$   $[\text{M}+\text{H}]^+$  472.1842, found 472.1845.

(2*R*,3*S*,4*S*)-4-(1*H*-indol-3-yl)-2-(4-methoxyphenyl)-3-phenyl-3,4-dihydro-2*H*-benzo[4,5]thiazolo[3,2-*a*]pyrimidine **3fa**:

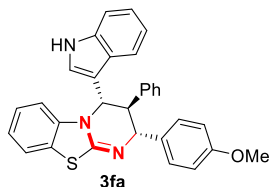

White solid, M.p.: 261-262 °C; yield: 55%;  $[\alpha]_D^{20} = +55$  ( $c$  0.34,  $\text{CH}_2\text{Cl}_2$ ); HPLC (Chiralpak ID, *i*-propanol/hexane = 20/80, flow rate 1.0 mL/min,  $\lambda = 254$  nm),  $t_1 = 12.50$  min (minor),  $t_2 = 17.62$  min (major), ee = 99%;  $^1\text{H}$  NMR (400 M,  $\text{d}_6\text{-DMSO}$ )  $\delta$  ppm: 10.66 (s, 1H), 7.47-7.42 (m, 1H), 7.23-7.14 (m, 3H), 7.10-7.01 (m, 6H), 6.88-6.78 (m, 6H), 6.61-6.59 (m, 2H), 5.67 (d,  $J = 10.0$  Hz, 1H), 4.87 (d,  $J = 10.3$  Hz, 1H), 3.71 (s, 3H), 3.19 (t,  $J = 10.1$  Hz, 1H);  $^{13}\text{C}$  NMR (100 MHz,  $\text{d}_6\text{-DMSO}$ )  $\delta$  ppm: 158.3, 156.0, 143.1, 140.7, 140.4, 137.8, 131.3, 130.0, 129.4, 128.6, 128.0, 127.1, 125.7, 124.5, 122.4, 122.3, 122.1, 119.4, 118.9, 112.3, 111.5, 109.9, 95.6, 64.1, 58.2, 55.6, 53.9; HRMS (ESI) Calcd. For  $\text{C}_{31}\text{H}_{26}\text{N}_3\text{OS}$   $[\text{M}+\text{H}]^+$  488.1791, found 488.1789.

(2*R*,3*S*,4*S*)-4-(1*H*-indol-3-yl)-3-phenyl-2-(*m*-tolyl)-3,4-dihydro-2*H*-benzo[4,5]thiazolo[3,2-*a*]pyrimidine **3ga**:

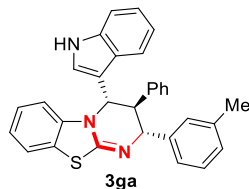

White solid, M.p.: 137-138 °C; yield: 52%;  $[\alpha]_D^{20} = +58$  ( $c$  0.23,  $\text{CH}_2\text{Cl}_2$ ); HPLC (Chiralpak ID, *i*-propanol/hexane = 10/90, flow rate 1.0 mL/min,  $\lambda = 254$  nm),  $t_1 = 18.74$  min (minor),  $t_2 = 21.28$  min (major), ee = 98%;  $^1\text{H}$  NMR (400 M,  $\text{d}_6\text{-DMSO}$ )  $\delta$  ppm: 10.85 (s, 1H), 7.46-7.43 (m, 1H), 7.34-7.26 (m, 2H), 7.15-7.01 (m, 7H), 7.00-6.81 (m, 6H), 6.80-6.74 (m, 2H), 6.59 (d,  $J = 7.2$  Hz, 1H), 5.70 (d,  $J = 10.0$  Hz, 1H), 4.82 (d,  $J = 10.2$  Hz, 1H), 3.15 (t,  $J = 10.1$  Hz, 1H), 2.11 (s, 3H);  $^{13}\text{C}$  NMR (100 MHz,  $\text{d}_6\text{-DMSO}$ )  $\delta$  ppm: 157.7, 143.7, 140.6, 140.5, 136.8, 129.2, 128.6, 128.3, 127.7, 127.3, 126.8, 125.9, 125.7, 125.5, 125.3, 125.0, 122.2, 122.1, 121.8, 121.5, 121.3, 119.5, 118.2, 112.4, 112.0, 111.5, 64.6, 58.0, 53.4, 21.4; HRMS (ESI) Calcd. For  $\text{C}_{31}\text{H}_{26}\text{N}_3\text{S}$   $[\text{M}+\text{H}]^+$  472.1842, found 472.1843.

(2*R*,3*S*,4*S*)-2-(3-chlorophenyl)-4-(1*H*-indol-3-yl)-3-phenyl-3,4-dihydro-2*H*-benzo[4,5]thiazolo[3,2-*a*]pyrimidine **3ha**:

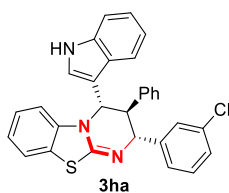

White solid, M.p.: 152-153 °C; yield: 72%;  $[\alpha]_D^{20} = +58$  (*c* 0.23, CH<sub>2</sub>Cl<sub>2</sub>); HPLC (Chiralpak ID, *i*-propanol/hexane = 10/90, flow rate 1.0 mL/min,  $\lambda = 254$  nm),  $t_1 = 23.34$  min (major),  $t_2 = 27.44$  min (minor), ee = >99%; <sup>1</sup>H NMR (400 M, d<sub>6</sub>-DMSO)  $\delta$  ppm: 10.89 (s, 1H), 7.51-7.43 (m, 1H), 7.38-7.23 (m, 4H), 7.18-6.98 (m, 7H), 6.93-6.78 (m, 5H), 6.54 (d, *J* = 6.7 Hz, 1H), 5.69 (d, *J* = 10.1 Hz, 1H), 4.87 (d, *J* = 10.3 Hz, 1H), 3.20 (t, *J* = 10.2 Hz, 1H); <sup>13</sup>C NMR (100 MHz, d<sub>6</sub>-DMSO)  $\delta$  ppm: 158.3, 146.4, 140.5, 140.2, 136.8, 132.7, 129.7, 129.2, 128.5, 127.9, 127.0, 126.8, 126.7, 125.7, 125.6, 125.1, 122.2, 122.2, 121.9, 121.5, 119.6, 118.2, 112.4, 112.1, 111.4, 64.2, 57.9, 53.5; HRMS (ESI) Calcd. For C<sub>30</sub>H<sub>23</sub>ClN<sub>3</sub>S [M+H]<sup>+</sup> 492.1296, found 492.1299.

(2*R*,3*S*,4*S*)-4-(1*H*-indol-3-yl)-3-phenyl-2-(*o*-tolyl)-3,4-dihydro-2*H*-benzo[4,5]thiazolo[3,2-*a*]pyrimidine **3ia**:

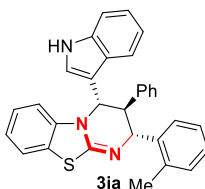

White solid, M.p.: 178-179 °C; yield: 62%;  $[\alpha]_D^{20} = +20$  (*c* 0.12, CH<sub>2</sub>Cl<sub>2</sub>); HPLC (Chiralpak ID, *i*-propanol/hexane = 10/90, flow rate 1.0 mL/min,  $\lambda = 254$  nm),  $t_1 = 20.25$  min (major),  $t_2 = 27.04$  min (minor), ee = 94%; <sup>1</sup>H NMR (400 M, d<sub>6</sub>-DMSO)  $\delta$  ppm: 10.86 (s, 1H), 7.85-7.67 (m, 1H), 7.53-7.43 (m, 1H), 7.38-7.21 (m, 3H), 7.20-7.04 (m, 2H), 7.02-6.72 (m, 9H), 6.64-6.62 (m, 2H), 5.66 (d, *J* = 10.2 Hz, 1H), 4.86 (d, *J* = 10.4 Hz, 1H), 3.53 (t, *J* = 10.4 Hz, 1H), 0.95 (s, 3H); <sup>13</sup>C NMR (100 MHz, d<sub>6</sub>-DMSO)  $\delta$  ppm: 158.2, 142.9, 140.5, 139.2, 137.5, 136.8, 131.3, 129.9, 129.7, 128.1, 127.8, 126.7, 125.6, 125.3, 122.3, 122.3, 122.0, 121.7, 119.7, 118.0, 112.5, 112.3, 111.1, 64.2, 58.5, 47.8, 19.0; HRMS (ESI) Calcd. For C<sub>31</sub>H<sub>26</sub>N<sub>3</sub>S [M+H]<sup>+</sup> 472.1842, found 472.1845.

(2*R*,3*S*,4*S*)-2-(2-chlorophenyl)-4-(1*H*-indol-3-yl)-3-phenyl-3,4-dihydro-2*H*-benzo[4,5]thiazolo[3,2-*a*]pyrimidine **3ja**:

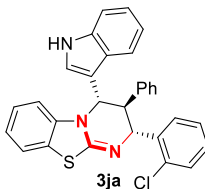

White solid, M.p.: 182-183 °C; yield: 72%;  $[\alpha]_D^{20} = +20$  (*c* 0.1, CH<sub>2</sub>Cl<sub>2</sub>); HPLC (Chiralpak ID, *i*-propanol/hexane = 10/90, flow rate 1.0 mL/min,  $\lambda = 254$  nm),  $t_1 = 19.45$  min (major),  $t_2 = 26.79$  min (minor), ee = >99%; <sup>1</sup>H NMR (400 M, d<sub>6</sub>-DMSO)  $\delta$  ppm: 10.83 (s, 1H), 7.45-7.39 (m, 1H), 7.35-7.24 (m, 2H), 7.14-7.04 (m, 7H), 7.02-6.96 (m, 2H), 6.92-6.78 (m, 5H), 6.56 (d, *J* = 7.4 Hz, 1H), 5.72 (d, *J* = 10.0 Hz, 1H), 4.87 (d, *J*



= 10.3 Hz, 1H), 3.19 (t,  $J$  = 10.1 Hz, 1H);  $^{13}\text{C}$  NMR (100 MHz,  $\text{d}_6\text{-DMSO}$ )  $\delta$  ppm: 158.2, 143.0, 140.5, 140.3, 136.9, 131.2, 129.9, 129.3, 128.5, 127.9, 127.0, 125.8, 125.6, 125.0, 122.3, 122.2, 121.9, 121.6, 119.6, 118.2, 112.5, 112.1, 111.4, 64.0, 58.0, 53.6; HRMS (ESI) Calcd. For  $\text{C}_{30}\text{H}_{23}\text{ClN}_3\text{S}$   $[\text{M}+\text{H}]^+$  492.1296, found 492.1301.

(2*R*,3*S*,4*S*)-2-(2-bromophenyl)-4-(1*H*-indol-3-yl)-3-phenyl-3,4-dihydro-2*H*-benzo[4,5]thiazolo[3,2-*a*]pyrimidine **3ka**:

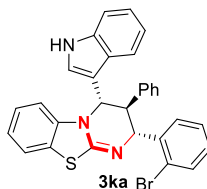

White solid, M.p.: 186-187 °C; yield: 70%;  $[\alpha]_{\text{D}}^{20}$  = +116 ( $c$  0.24,  $\text{CH}_2\text{Cl}_2$ ); HPLC (Chiralpak ID, *i*-propanol/hexane = 15/85, flow rate 1.0 mL/min,  $\lambda$  = 254 nm),  $t_1$  = 12.10 min (major),  $t_2$  = 16.53 min (minor), ee = 98%;  $^1\text{H}$  NMR (400 M,  $\text{d}_6\text{-DMSO}$ )  $\delta$  ppm: 10.83 (s, 1H), 7.46-7.37 (m, 3H), 7.34-7.11 (m, 3H), 7.05-6.82 (m, 11H), 6.80-6.59 (m, 1H), 5.82 (d,  $J$  = 7.4 Hz, 1H), 5.28 (d,  $J$  = 4.6 Hz, 1H), 3.54 (s, 1H);  $^{13}\text{C}$  NMR (100 MHz,  $\text{d}_6\text{-DMSO}$ )  $\delta$  ppm: 158.1, 142.5, 140.5, 139.8, 136.8, 132.2, 130.3, 129.2, 128.9, 128.3, 127.8, 127.0, 125.6, 125.0, 123.6, 122.2, 122.2, 121.9, 121.5, 119.5, 118.3, 112.3, 111.9, 111.5, 63.1, 57.5, 51.9; HRMS (ESI) Calcd. For  $\text{C}_{30}\text{H}_{23}\text{BrN}_3\text{S}$   $[\text{M}+\text{H}]^+$  536.0791, found 536.0794.

(2*R*,3*S*,4*S*)-2-(benzo[*d*][1,3]dioxol-5-yl)-4-(1*H*-indol-3-yl)-3-phenyl-3,4-dihydro-2*H*-benzo[4,5]thiazolo[3,2-*a*]pyrimidine **3la**:

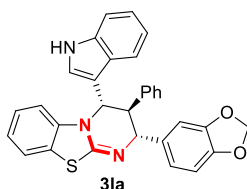

White solid, M.p.: 204-205 °C; yield: 70%;  $[\alpha]_{\text{D}}^{20}$  = +98 ( $c$  0.32,  $\text{CH}_2\text{Cl}_2$ ); HPLC (Chiralpak ID, *i*-propanol/hexane = 8/92, flow rate 1.0 mL/min,  $\lambda$  = 254 nm),  $t_1$  = 15.43 min (minor),  $t_2$  = 17.06 min (major), ee = >99%;  $^1\text{H}$  NMR (400 M,  $\text{d}_6\text{-DMSO}$ )  $\delta$  ppm: 10.81 (s, 1H), 7.45-7.39 (m, 1H), 7.35-7.21 (m, 2H), 7.08-6.95 (m, 5H), 6.92-6.76 (m, 5H), 6.61-6.46 (m, 4H), 5.86 (s, 2H), 5.66 (d,  $J$  = 10.0 Hz, 1H), 4.77 (d,  $J$  = 10.3 Hz, 1H), 3.19 (t,  $J$  = 10.2 Hz, 1H);  $^{13}\text{C}$  NMR (100 MHz,  $\text{d}_6\text{-DMSO}$ )  $\delta$  ppm: 157.6, 147.0, 145.8, 140.6, 140.5, 138.0, 136.8, 129.2, 128.3, 126.8, 125.7, 125.5, 125.0, 122.2, 122.1, 121.8, 121.5, 121.3, 119.5, 118.3, 112.4, 112.0, 111.5, 108.3, 107.7, 101.0, 64.3, 58.0, 53.6; HRMS (ESI) Calcd. For  $\text{C}_{31}\text{H}_{24}\text{N}_3\text{O}_2\text{S}$   $[\text{M}+\text{H}]^+$  502.1584, found 502.1585.

(2*R*,3*S*,4*S*)-4-(1*H*-indol-3-yl)-2-(naphthalen-1-yl)-3-phenyl-3,4-dihydro-2*H*-benzo[4,5]thiazolo[3,2-*a*]pyrimidine **3ma**:

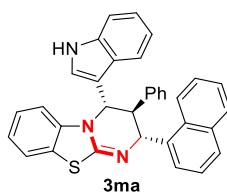

White solid, M.p.: 215-216 °C; yield: 68%;  $[\alpha]_D^{20} = +100$  (*c* 0.31, CH<sub>2</sub>Cl<sub>2</sub>); HPLC (Chiralpak ID, *i*-propanol/hexane = 15/85, flow rate 1.0 mL/min,  $\lambda = 254$  nm),  $t_1 = 20.43$  min (major),  $t_2 = 23.18$  min (minor), ee = 99%; <sup>1</sup>H NMR (400 M, d<sub>6</sub>-DMSO)  $\delta$  ppm: 10.86 (s, 1H), 7.57-7.21 (m, 4H), 7.17-7.00 (m, 11H), 6.97-6.79 (m, 5H), 6.61 (d, *J* = 7.3 Hz, 1H), 5.73 (d, *J* = 10.0 Hz, 1H), 4.89 (d, *J* = 10.3 Hz, 1H), 3.27 (t, *J* = 10.2 Hz, 1H); <sup>13</sup>C NMR (100 MHz, d<sub>6</sub>-DMSO)  $\delta$  ppm: 158.9, 143.8, 142.3, 141.1, 137.5, 132.4, 132.0, 131.2, 130.6, 130.6, 129.2, 128.7, 126.5, 126.3, 125.7, 122.9, 122.9, 122.6, 122.5, 122.3, 120.3, 118.8, 113.1, 112.8, 111.7, 64.5, 58.2, 54.1; HRMS (ESI) Calcd. For C<sub>34</sub>H<sub>26</sub>N<sub>3</sub>S [M+H]<sup>+</sup> 508.1842, found 508.1841.

(2*R*,3*R*,4*S*)-4-(1*H*-indol-3-yl)-3-phenyl-2-(thiophen-2-yl)-3,4-dihydro-2*H*-benzo[4,5]thiazolo[3,2-*a*]pyrimidine **3ma**:

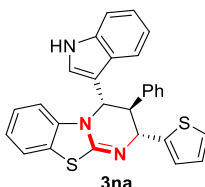

White solid, M.p.: 144-145 °C; yield: 70%;  $[\alpha]_D^{20} = +67$  (*c* 0.25, CH<sub>2</sub>Cl<sub>2</sub>); HPLC (Chiralpak ID, *i*-propanol/hexane = 10/90, flow rate 1.0 mL/min,  $\lambda = 254$  nm),  $t_1 = 28.64$  min (minor),  $t_2 = 30.18$  min (major), ee = 97%; <sup>1</sup>H NMR (400 M, d<sub>6</sub>-DMSO)  $\delta$  ppm: 10.83 (s, 1H), 7.45-7.32 (m, 1H), 7.26-7.18 (m, 3H), 7.15-7.02 (m, 3H), 7.00-6.78 (m, 7H), 6.66-6.64 (m, 1H), 6.55 (d, *J* = 7.6 Hz, 1H), 6.22 (d, *J* = 3.3 Hz, 1H), 5.69 (d, *J* = 10.0 Hz, 1H), 5.21 (d, *J* = 10.2 Hz, 1H), 3.17 (t, *J* = 10.1 Hz, 1H); <sup>13</sup>C NMR (100 MHz, d<sub>6</sub>-DMSO)  $\delta$  ppm: 158.0, 148.2, 140.6, 140.4, 136.8, 129.3, 128.5, 127.2, 126.5, 125.7, 125.6, 125.0, 124.4, 124.3, 122.2, 122.2, 122.0, 121.5, 119.5, 118.1, 112.4, 112.2, 111.2, 60.4, 58.0, 54.0; HRMS (ESI) Calcd. For C<sub>28</sub>H<sub>22</sub>N<sub>3</sub>S<sub>2</sub> [M+H]<sup>+</sup> 464.1250, found 464.1254.

(2*R*,3*R*,4*S*)-2-(furan-2-yl)-4-(1*H*-indol-3-yl)-3-phenyl-3,4-dihydro-2*H*-benzo[4,5]thiazolo[3,2-*a*]pyrimidine **3oa**:

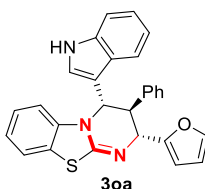

White solid, M.p.: 162-163 °C; yield: 73%;  $[\alpha]_D^{20} = +73$  (*c* 0.23, CH<sub>2</sub>Cl<sub>2</sub>); HPLC (Chiralpak ID, *i*-propanol/hexane = 10/90, flow rate 1.0 mL/min,  $\lambda = 254$  nm),  $t_1 = 24.71$  min (major),  $t_2 = 27.35$  min (minor), ee = 91%; <sup>1</sup>H NMR (400 M, d<sub>6</sub>-DMSO)  $\delta$  ppm: 10.90 (s, 1H), 7.40-7.28 (m, 3H), 7.10-6.92 (m, 11H), 6.81-6.73 (m, 3H), 5.74 (d, *J* =

10.2 Hz, 1H), 4.82 (d,  $J = 10.4$  Hz, 1H), 3.24 (t,  $J = 10.3$  Hz, 1H);  $^{13}\text{C}$  NMR (100 MHz,  $\text{d}_6\text{-DMSO}$ )  $\delta$  ppm: 157.8, 155.9, 141.8, 140.6, 140.4, 136.8, 128.8, 128.4, 127.0, 125.6, 125.6, 125.0, 122.2, 122.2, 121.9, 121.6, 119.5, 118.2, 112.4, 112.0, 111.3, 110.3, 106.8, 58.6, 57.7, 49.8; HRMS (ESI) Calcd. For  $\text{C}_{28}\text{H}_{22}\text{N}_3\text{OS}$   $[\text{M}+\text{H}]^+$  448.1478, found 448.1478.

(2*R*,3*S*,4*S*)-8-fluoro-4-(1*H*-indol-3-yl)-2,3-diphenyl-3,4-dihydro-2*H*-benzo[4,5]thiazolo[3,2-*a*]pyrimidine **3pa**:

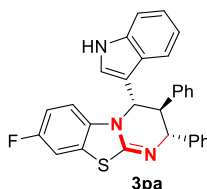

White solid, M.p.: 136-137 °C; yield: 82%;  $[\alpha]_{\text{D}}^{20} = +116$  ( $c$  0.27,  $\text{CH}_2\text{Cl}_2$ ); HPLC (Chiralpak IE, *i*-propanol/hexane = 15/85, flow rate 1.0 mL/min,  $\lambda = 254$  nm),  $t_1 = 7.19$  min (major),  $t_2 = 9.89$  min (minor), ee = >99%;  $^1\text{H}$  NMR (400 M,  $\text{d}_6\text{-DMSO}$ )  $\delta$  ppm: 10.84 (s, 1H), 7.38-7.29 (m, 1H), 7.19-7.15 (m, 1H), 7.12-6.88 (m, 10H), 6.79-6.57 (m, 5H), 6.45 (d,  $J = 7.2$  Hz, 1H), 5.63 (d,  $J = 10.0$  Hz, 1H), 4.79 (d,  $J = 10.2$  Hz, 1H), 3.08 (t,  $J = 10.0$  Hz, 1H);  $^{13}\text{C}$  NMR (100 MHz,  $\text{d}_6\text{-DMSO}$ )  $\delta$  ppm: 159.0 (d,  $J = 233.2$  Hz), 158.0, 142.8, 140.3, 140.1, 136.7, 136.6, 131.1, 129.8, 129.2, 128.4, 127.8, 127.0, 126.3, 125.6, 122.2, 122.1, 122.0, 121.8, 119.1, 111.8 (d,  $J = 35.9$  Hz), 108.1 (d,  $J = 24.2$  Hz), 98.5, 98.2, 63.8, 57.7, 53.6;  $^{19}\text{F}$  NMR (376 MHz,  $\text{d}_6\text{-DMSO}$ )  $\delta$  ppm: -122.4; HRMS (ESI) Calcd. For  $\text{C}_{30}\text{H}_{23}\text{FN}_3\text{S}$   $[\text{M}+\text{H}]^+$  476.1591, found 476.1593.

(2*R*,3*S*,4*S*)-8-chloro-4-(1*H*-indol-3-yl)-2,3-diphenyl-3,4-dihydro-2*H*-benzo[4,5]thiazolo[3,2-*a*]pyrimidine **3qa**:

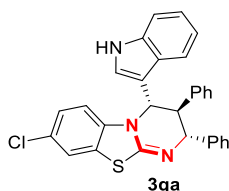

White solid, M.p.: 195-196 °C; yield: 82%;  $[\alpha]_{\text{D}}^{20} = +84$  ( $c$  0.25,  $\text{CH}_2\text{Cl}_2$ ); HPLC (Chiralpak ID, *i*-propanol/hexane = 10/90, flow rate 1.0 mL/min,  $\lambda = 254$  nm),  $t_1 = 20.66$  min (major),  $t_2 = 23.83$  min (minor), ee = 98%;  $^1\text{H}$  NMR (400 M,  $\text{d}_6\text{-DMSO}$ )  $\delta$  ppm: 10.87 (s, 1H), 7.70-7.53 (m, 1H), 7.37-7.20 (m, 2H), 7.10-6.90 (m, 11H), 6.84-6.82 (m, 3H), 6.51 (d,  $J = 8.2$  Hz, 1H), 5.70 (d,  $J = 10.1$  Hz, 1H), 4.85 (d,  $J = 10.4$  Hz, 1H), 3.20 (t,  $J = 10.2$  Hz, 1H);  $^{13}\text{C}$  NMR (100 MHz,  $\text{d}_6\text{-DMSO}$ )  $\delta$  ppm: 158.0, 142.8, 140.3, 140.1, 137.1, 131.2, 129.9, 129.2, 128.5, 127.9, 127.1, 126.8, 126.4, 125.6, 123.9, 122.3, 122.2, 122.0, 119.9, 119.5, 112.0, 112.0, 111.8, 63.9, 57.5, 53.7; HRMS (ESI) Calcd. For  $\text{C}_{30}\text{H}_{23}\text{ClN}_3\text{S}$   $[\text{M}+\text{H}]^+$  492.1296, found 492.1299.

(2*R*,3*S*,4*S*)-8-bromo-4-(1*H*-indol-3-yl)-2,3-diphenyl-3,4-dihydro-2*H*-benzo[4,5]thiazolo[3,2-*a*]pyrimidine **3ra**:

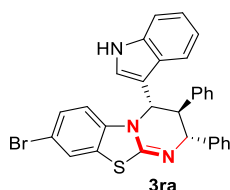

White solid, M.p.: 172-173 °C; yield: 83%;  $[\alpha]_D^{20} = +49$  (*c* 0.32, CH<sub>2</sub>Cl<sub>2</sub>); HPLC (Chiralpak ID, *i*-propanol/hexane = 10/92, flow rate 1.0 mL/min,  $\lambda = 254$  nm),  $t_1 = 22.24$  min (major),  $t_2 = 28.70$  min (minor), ee = 98%; <sup>1</sup>H NMR (400 M, d<sub>6</sub>-DMSO)  $\delta$  ppm: 10.87 (s, 1H), 7.70-7.60 (m, 1H), 7.35-7.18 (m, 2H), 7.08-6.90 (m, 12H), 6.82 (s, 2H), 6.46 (d, *J* = 9.2 Hz, 1H), 5.70 (d, *J* = 10.1 Hz, 1H), 4.85 (d, *J* = 10.4 Hz, 1H), 3.20 (t, *J* = 10.2 Hz, 1H); <sup>13</sup>C NMR (100 MHz, d<sub>6</sub>-DMSO)  $\delta$  ppm: 157.9, 140.5, 140.4, 140.1, 140.1, 136.8, 129.8, 129.7, 129.2, 128.4, 126.9, 125.8, 125.5, 125.0, 122.2, 122.2, 121.8, 121.5, 119.5, 118.2, 114.7, 114.5, 112.4, 112.1, 111.4, 63.9, 57.9, 53.8; HRMS (ESI) Calcd. For C<sub>30</sub>H<sub>23</sub>BrN<sub>3</sub>S [M+H]<sup>+</sup> 536.0791, found 536.0795.

(2*R*,3*S*,4*S*)-4-(1*H*-indol-3-yl)-8-methyl-2,3-diphenyl-3,4-dihydro-2*H*-benzo[4,5]thiazolo[3,2-*a*]pyrimidine **3sa**:

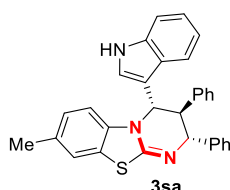

White solid, M.p.: 158-159 °C; yield: 72%;  $[\alpha]_D^{20} = +104$  (*c* 0.25, CH<sub>2</sub>Cl<sub>2</sub>); HPLC (Chiralpak ID, *i*-propanol/hexane = 10/90, flow rate 1.0 mL/min,  $\lambda = 254$  nm),  $t_1 = 26.40$  min (minor),  $t_2 = 29.47$  min (major), ee = 98%; <sup>1</sup>H NMR (400 M, d<sub>6</sub>-DMSO)  $\delta$  ppm: 10.81 (s, 1H), 7.32-7.23 (m, 3H), 7.10-6.97 (m, 9H), 6.94-6.81 (m, 4H), 6.59 (d, *J* = 7.6 Hz, 1H), 6.45 (d, *J* = 8.2 Hz, 1H), 5.66 (d, *J* = 10.1 Hz, 1H), 4.82 (d, *J* = 10.3 Hz, 1H), 3.21 (t, *J* = 10.2 Hz, 1H), 2.13 (s, 3H); <sup>13</sup>C NMR (100 MHz, d<sub>6</sub>-DMSO)  $\delta$  ppm: 158.0, 143.8, 140.6, 138.4, 136.8, 131.0, 129.2, 128.3, 128.1, 127.9, 126.8, 126.7, 126.1, 125.8, 125.0, 122.4, 122.2, 121.5, 119.5, 118.2, 112.4, 111.9, 111.5, 64.6, 58.1, 53.6, 20.8; HRMS (ESI) Calcd. For C<sub>31</sub>H<sub>26</sub>N<sub>3</sub>S [M+H]<sup>+</sup> 472.1842, found 472.1845.

(2*R*,3*S*,4*S*)-8-ethyl-4-(1*H*-indol-3-yl)-2,3-diphenyl-3,4-dihydro-2*H*-benzo[4,5]thiazolo[3,2-*a*]pyrimidine **3ta**:

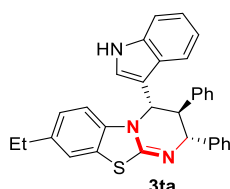

White solid, M.p.: 182-183 °C; yield: 80%;  $[\alpha]_D^{20} = +121$  (*c* 0.32, CH<sub>2</sub>Cl<sub>2</sub>); HPLC (Chiralpak IE, *i*-propanol/hexane = 10/90, flow rate 1.0 mL/min,  $\lambda = 254$  nm),  $t_1 = 13.94$  min (minor),  $t_2 = 15.93$  min (major), ee = >99%; <sup>1</sup>H NMR (400 M, d<sub>6</sub>-DMSO)  $\delta$  ppm: 10.81 (s, 1H), 7.32-7.21 (m, 2H), 7.09-6.97 (m, 10H), 6.94-6.80 (m, 4H), 6.45-6.34 (m,

2H), 5.63 (d,  $J = 10.0$  Hz, 1H), 4.80 (d,  $J = 10.4$  Hz, 1H), 3.86-3.81 (m, 2H), 3.20 (t,  $J = 10.2$  Hz, 1H), 1.21 (t,  $J = 7.0$  Hz, 3H);  $^{13}\text{C}$  NMR (100 MHz,  $d_6$ -DMSO)  $\delta$  ppm: 158.3, 154.0, 143.8, 140.5, 136.8, 134.4, 129.2, 128.3, 128.1, 127.9, 126.8, 126.7, 125.8, 125.0, 123.4, 121.5, 119.5, 118.3, 112.6, 112.4, 111.9, 111.5, 108.5, 64.6, 63.8, 58.1, 53.6, 15.1; HRMS (ESI) Calcd. For  $\text{C}_{32}\text{H}_{28}\text{N}_3\text{S}$   $[\text{M}+\text{H}]^+$  486.1998, found 486.1997.

(2*R*,3*S*,4*S*)-4-(1*H*-indol-3-yl)-8-methoxy-2,3-diphenyl-3,4-dihydro-2*H*-benzo[4,5]thiazolo[3,2-*a*]pyrimidine **3ua**:

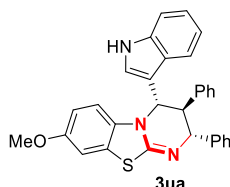

White solid, M.p.: 155-156 °C; yield: 72%;  $[\alpha]_D^{20} = +115$  ( $c$  0.22,  $\text{CH}_2\text{Cl}_2$ ); HPLC (Chiralpak ID, *i*-propanol/hexane = 10/90, flow rate 1.0 mL/min,  $\lambda = 254$  nm),  $t_1 = 31.99$  min (minor),  $t_2 = 34.79$  min (major), ee = 99%;  $^1\text{H}$  NMR (400 M,  $d_6$ -DMSO)  $\delta$  ppm: 10.80 (s, 1H), 7.33-7.29 (m, 1H), 7.26-7.22 (m, 1H), 7.12-6.99 (m, 10H), 6.97-6.89 (m, 2H), 6.81 (d,  $J = 6.0$  Hz, 2H), 6.47-6.37 (m, 2H), 5.64 (d,  $J = 10.0$  Hz, 1H), 4.81 (d,  $J = 10.4$  Hz, 1H), 3.60 (s, 3H), 3.19 (t,  $J = 10.2$  Hz, 1H);  $^{13}\text{C}$  NMR (100 MHz,  $d_6$ -DMSO)  $\delta$  ppm: 158.0, 154.7, 143.9, 140.6, 136.8, 134.6, 129.2, 128.3, 128.1, 127.9, 126.8, 126.7, 125.8, 125.1, 123.4, 121.5, 119.5, 118.5, 113.3, 112.5, 112.4, 111.6, 111.3, 108.1, 106.0, 64.7, 58.1, 55.8, 53.6; HRMS (ESI) Calcd. For  $\text{C}_{31}\text{H}_{26}\text{N}_3\text{OS}$   $[\text{M}+\text{H}]^+$  488.1791, found 488.1796.

(2*R*,3*S*,4*S*)-7-chloro-4-(1*H*-indol-3-yl)-2,3-diphenyl-3,4-dihydro-2*H*-benzo[4,5]thiazolo[3,2-*a*]pyrimidine **3va**:

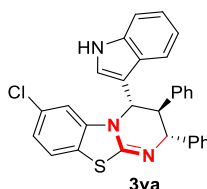

White solid, M.p.: 178-179 °C; yield: 80%;  $[\alpha]_D^{20} = +87$  ( $c$  0.22,  $\text{CH}_2\text{Cl}_2$ ); HPLC (Chiralpak IE, *i*-propanol/hexane = 30/70, flow rate 1.0 mL/min,  $\lambda = 254$  nm),  $t_1 = 4.13$  min (major),  $t_2 = 4.64$  min (minor), ee = 98%;  $^1\text{H}$  NMR (400 M,  $d_6$ -DMSO)  $\delta$  ppm: 10.88 (s, 1H), 7.66-7.54 (m, 1H), 7.35-7.21 (m, 2H), 7.10-6.99 (m, 9H), 6.96-6.83 (m, 5H), 6.51 (d,  $J = 8.2$  Hz, 1H), 5.70 (d,  $J = 10.1$  Hz, 1H), 4.85 (d,  $J = 10.4$  Hz, 1H), 3.21 (t,  $J = 10.3$  Hz, 1H);  $^{13}\text{C}$  NMR (100 MHz,  $d_6$ -DMSO)  $\delta$  ppm: 158.1, 143.0, 142.5, 140.3, 136.7, 131.6, 131.3, 130.4, 129.9, 128.5, 128.0, 125.8, 125.5, 124.9, 122.2, 122.1, 121.9, 121.7, 121.6, 119.6, 118.1, 112.4, 112.1, 111.0, 63.7, 57.5, 53.3; HRMS (ESI) Calcd. For  $\text{C}_{30}\text{H}_{23}\text{ClN}_3\text{S}$   $[\text{M}+\text{H}]^+$  492.1296, found 492.1301.

(2*R*,3*S*,4*S*)-7-bromo-4-(1*H*-indol-3-yl)-2,3-diphenyl-3,4-dihydro-2*H*-benzo[4,5]thiazolo[3,2-*a*]pyrimidine **3wa**:

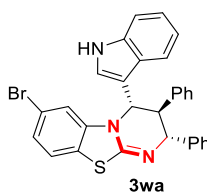

White solid, M.p.: 180-181 °C; yield: 72%;  $[\alpha]_D^{20} = +68$  (*c* 0.22, CH<sub>2</sub>Cl<sub>2</sub>); HPLC (Chiralpak ID, *i*-propanol/hexane = 20/80, flow rate 1.0 mL/min,  $\lambda = 254$  nm),  $t_1 = 9.13$  min (minor),  $t_2 = 9.82$  min (major), ee = >99%; <sup>1</sup>H NMR (400 M, d<sub>6</sub>-DMSO)  $\delta$  ppm: 10.86 (s, 1H), 7.44-7.42 (m, 1H), 7.33-7.26 (m, 3H), 7.12-6.88 (m, 9H), 6.85-6.77 (m, 2H), 6.53 (d, *J* = 7.6 Hz, 1H), 6.13-6.11 (m, 1H), 5.92 (d, *J* = 3.0 Hz, 1H), 5.00 (d, *J* = 10.2 Hz, 1H), 3.51 (t, *J* = 10.0 Hz, 1H); <sup>13</sup>C NMR (100 MHz, d<sub>6</sub>-DMSO)  $\delta$  ppm: 157.9, 142.6, 140.1, 139.9, 135.0, 131.0, 129.8, 129.2, 128.4, 127.8, 127.2, 127.0, 126.1, 125.5, 123.9, 122.2, 122.1, 121.9, 121.5, 117.3, 113.8, 111.9, 111.4, 63.8, 57.3, 53.7; HRMS (ESI) Calcd. For C<sub>30</sub>H<sub>23</sub>BrN<sub>3</sub>S [M+H]<sup>+</sup> 536.0791, found 536.0793.

(2*R*,3*S*,4*S*)-6-fluoro-4-(1*H*-indol-3-yl)-2,3-diphenyl-3,4-dihydro-2*H*-benzo[4,5]thiazolo[3,2-*a*]pyrimidine **3xa**:

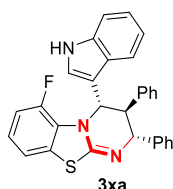

White solid, M.p.: 145-146 °C; yield: 62%;  $[\alpha]_D^{20} = +45$  (*c* 0.12, CH<sub>2</sub>Cl<sub>2</sub>); HPLC (Chiralpak ID, *i*-propanol/hexane = 15/85, flow rate 1.0 mL/min,  $\lambda = 254$  nm),  $t_1 = 10.12$  (major),  $t_2 = 13.35$  min (minor), ee = 71%; <sup>1</sup>H NMR (400 M, d<sub>6</sub>-DMSO)  $\delta$  ppm: 10.82 (s, 1H), 7.50-7.23 (m, 1H), 7.17-7.08 (m, 1H), 7.04-6.87 (m, 9H), 6.78-6.53 (m, 6H), 6.44 (d, *J* = 7.2 Hz, 1H), 5.62 (d, *J* = 10.0 Hz, 1H), 4.78 (d, *J* = 10.2 Hz, 1H), 3.07 (t, *J* = 10.0 Hz, 1H); <sup>13</sup>C NMR (100 MHz, d<sub>6</sub>-DMSO)  $\delta$  ppm: 158.9 (d, *J* = 233.1 Hz), 157.9, 142.6, 140.2, 140.0, 136.6, 136.5, 131.0, 129.7, 129.0, 128.3, 127.7, 126.9, 126.2, 125.5, 122.1, 122.0, 121.8, 121.7, 119.0, 118.9, 111.7 (d, *J* = 35.9 Hz), 107.9 (d, *J* = 24.1 Hz), 98.4, 98.1, 63.7, 57.6, 53.5; <sup>19</sup>F NMR (376 MHz, d<sub>6</sub>-DMSO)  $\delta$  ppm: -122.5; HRMS (ESI) Calcd. For C<sub>30</sub>H<sub>23</sub>FN<sub>3</sub>S [M+H]<sup>+</sup> 476.1591, found 476.1595.

(2*R*,3*S*,4*S*)-2,3-bis(4-chlorophenyl)-4-(1*H*-indol-3-yl)-3,4-dihydro-2*H*-benzo[4,5]thiazolo[3,2-*a*]pyrimidine **3cb**:

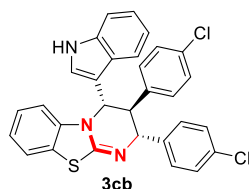

White solid, M.p.: 168-169 °C; yield: 78%;  $[\alpha]_D^{20} = +80$  (*c* 0.23, CH<sub>2</sub>Cl<sub>2</sub>); HPLC (Chiralpak ID, *i*-propanol/hexane = 10/90, flow rate 1.0 mL/min,  $\lambda = 254$  nm),  $t_1 = 15.29$  min (minor),  $t_2 = 17.06$  min (major), ee = >99%; <sup>1</sup>H NMR (400 M, d<sub>6</sub>-DMSO)  $\delta$  ppm: 10.88 (s, 1H), 7.47-7.42 (m, 1H), 7.36-7.21 (m, 2H), 7.17-6.98 (m, 8H), 6.93-6.77 (m,

5H), 6.54 (d,  $J = 7.3$  Hz, 1H), 5.69 (d,  $J = 10.1$  Hz, 1H), 4.87 (d,  $J = 10.4$  Hz, 1H), 3.21 (t,  $J = 10.2$  Hz, 1H);  $^{13}\text{C}$  NMR (100 MHz,  $d_6$ -DMSO)  $\delta$  ppm: 158.2, 142.7, 140.4, 139.3, 136.8, 131.5, 131.3, 131.0, 129.9, 128.4, 128.0, 125.8, 125.6, 124.9, 122.2, 121.9, 121.6, 119.6, 118.1, 112.5, 112.1, 111.1, 63.8, 57.8, 53.1; HRMS (ESI) Calcd. For  $\text{C}_{30}\text{H}_{22}\text{Cl}_2\text{N}_3\text{S}$   $[\text{M}+\text{H}]^+$  526.0906, found 526.0909.

(2*R*,3*S*,4*S*)-3-(4-bromophenyl)-2-(4-chlorophenyl)-4-(1*H*-indol-3-yl)-3,4-dihydro-2*H*-benzo[4,5]thiazolo[3,2-*a*]pyrimidine **3cc**:

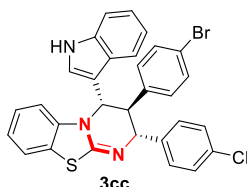

White solid, M.p.: 195-196 °C; yield: 74%;  $[\alpha]^{20}_{\text{D}} = +157$  ( $c$  0.22,  $\text{CH}_2\text{Cl}_2$ ); HPLC (Chiralpak ID, *i*-propanol/hexane = 10/90, flow rate 1.0 mL/min,  $\lambda = 254$  nm),  $t_1 = 16.88$  min (minor),  $t_2 = 18.81$  min (major), ee = >99%;  $^1\text{H}$  NMR (400 M,  $d_6$ -DMSO)  $\delta$  ppm: 10.91 (s, 1H), 7.48-7.46 (m, 1H), 7.34-7.29 (m, 4H), 7.27-7.12 (m, 2H), 7.10-7.01 (m, 4H), 6.96-6.81 (m, 5H), 6.57 (d,  $J = 7.2$  Hz, 1H), 5.72 (d,  $J = 10.1$  Hz, 1H), 4.91 (d,  $J = 10.3$  Hz, 1H), 3.23 (t,  $J = 10.2$  Hz, 1H);  $^{13}\text{C}$  NMR (100 MHz,  $d_6$ -DMSO)  $\delta$  ppm: 158.1, 142.7, 140.4, 139.8, 136.8, 131.4, 131.3, 129.9, 128.1, 125.9, 125.6, 122.2, 121.9, 121.6, 120.1, 119.6, 118.1, 112.5, 112.1, 111.1, 63.7, 57.8, 53.1; HRMS (ESI) Calcd. For  $\text{C}_{30}\text{H}_{22}\text{BrClN}_3\text{S}$   $[\text{M}+\text{H}]^+$  570.0401, found 570.0402.

(2*R*,3*S*,4*S*)-2-(4-chlorophenyl)-4-(1*H*-indol-3-yl)-3-(*p*-tolyl)-3,4-dihydro-2*H*-benzo[4,5]thiazolo[3,2-*a*]pyrimidine **3cd**:

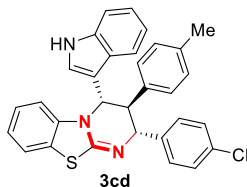

White solid, M.p.: 146-147 °C; yield: 64%;  $[\alpha]^{20}_{\text{D}} = +107$  ( $c$  0.24,  $\text{CH}_2\text{Cl}_2$ ); HPLC (Chiralpak ID, *i*-propanol/hexane = 10/90, flow rate 1.0 mL/min,  $\lambda = 254$  nm),  $t_1 = 15.02$  min (minor),  $t_2 = 20.43$  min (major), ee = 99%;  $^1\text{H}$  NMR (400 M,  $d_6$ -DMSO)  $\delta$  ppm: 10.86 (s, 1H), 7.48-7.46 (m, 1H), 7.39-7.23 (m, 2H), 7.19-7.00 (m, 6H), 6.96-6.76 (m, 7H), 6.61 (d,  $J = 7.3$  Hz, 1H), 5.69 (d,  $J = 10.0$  Hz, 1H), 4.87 (d,  $J = 10.3$  Hz, 1H), 3.21 (t,  $J = 10.1$  Hz, 1H), 2.18 (s, 3H);  $^{13}\text{C}$  NMR (100 MHz,  $d_6$ -DMSO)  $\delta$  ppm: 158.1, 143.0, 140.5, 137.2, 136.8, 135.8, 131.1, 129.9, 129.1, 129.0, 127.9, 125.9, 125.6, 124.9, 122.2, 122.2, 121.9, 121.5, 119.5, 118.2, 112.4, 112.1, 111.3, 63.9, 58.1, 52.9, 21.1; HRMS (ESI) Calcd. For  $\text{C}_{31}\text{H}_{25}\text{ClN}_3\text{S}$   $[\text{M}+\text{H}]^+$  506.1452, found 506.1450.

(2*R*,3*S*,4*S*)-3-(4-(*tert*-butyl)phenyl)-2-(4-chlorophenyl)-4-(1*H*-indol-3-yl)-3,4-dihydro-2*H*-benzo[4,5]thiazolo[3,2-*a*]pyrimidine **3ce**:

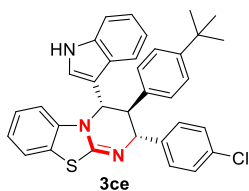

White solid, M.p.: 189-190 °C; yield: 75%;  $[\alpha]_D^{20} = -18$  (*c* 0.1, CH<sub>2</sub>Cl<sub>2</sub>); HPLC (Chiralpak ID, *i*-propanol/hexane = 10/90, flow rate 1.0 mL/min,  $\lambda = 254$  nm),  $t_1 = 10.68$  min (minor),  $t_2 = 13.27$  min (major), ee = >99%; <sup>1</sup>H NMR (400 M, d<sub>6</sub>-DMSO)  $\delta$  ppm: 10.83 (s, 1H), 7.46-7.44 (m, 1H), 7.28-7.21 (m, 2H), 7.11-6.96 (m, 7H), 6.93-6.81 (m, 6H), 6.58 (d, *J* = 7.3 Hz, 1H), 5.68 (d, *J* = 9.4 Hz, 1H), 4.84 (d, *J* = 9.7 Hz, 1H), 3.23 (t, *J* = 9.6 Hz, 1H), 1.17 (s, 9H); <sup>13</sup>C NMR (100 MHz, d<sub>6</sub>-DMSO)  $\delta$  ppm: 158.4, 149.2, 142.8, 140.4, 137.3, 136.8, 131.1, 129.8, 128.8, 127.8, 125.7, 125.2, 124.9, 122.2, 122.0, 121.5, 119.5, 118.2, 112.3, 112.1, 111.5, 63.7, 57.8, 52.6, 34.5, 31.5; HRMS (ESI) Calcd. For C<sub>34</sub>H<sub>31</sub>ClN<sub>3</sub>S [M+H]<sup>+</sup> 548.1922, found 548.1917.

(2*R*,3*S*,4*S*)-2-(4-chlorophenyl)-4-(1*H*-indol-3-yl)-3-(4-(trifluoromethyl)phenyl)-3,4-dihydro-2*H*-benzo[4,5]thiazolo[3,2-*a*]pyrimidine **3cf**:

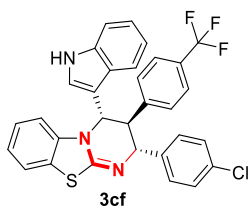

White solid, M.p.: 168-169 °C; yield: 74%;  $[\alpha]_D^{20} = +117$  (*c* 0.25, CH<sub>2</sub>Cl<sub>2</sub>); HPLC (Chiralpak ID, *i*-propanol/hexane = 10/90, flow rate 1.0 mL/min,  $\lambda = 254$  nm),  $t_1 = 11.75$  min (minor),  $t_2 = 17.72$  min (major), ee = >99%; <sup>1</sup>H NMR (400 M, d<sub>6</sub>-DMSO)  $\delta$  ppm: 10.86 (s, 1H), 7.42-7.36 (m, 3H), 7.32-7.22 (m, 2H), 7.12-6.97 (m, 8H), 6.91-6.76 (m, 3H), 6.54 (d, *J* = 7.2 Hz, 1H), 5.74 (d, *J* = 10.1 Hz, 1H), 4.87 (d, *J* = 10.3 Hz, 1H), 3.31 (t, *J* = 10.2 Hz, 1H); <sup>13</sup>C NMR (100 MHz, d<sub>6</sub>-DMSO)  $\delta$  ppm: 158.7, 145.0, 142.2, 140.2, 136.8, 131.4, 130.1, 129.8, 128.1, 127.6 (q, *J* = 31.7 Hz), 126.0, 125.8 (q, *J* = 15.4 Hz), 125.2, 124.8, 123.2, 122.2, 120.9 (q, *J* = 246.7 Hz), 118.1, 112.5, 112.2, 110.9, 63.6, 57.7, 53.5; <sup>19</sup>F NMR (376 MHz, d<sub>6</sub>-DMSO)  $\delta$  ppm: -60.8; HRMS (ESI) Calcd. For C<sub>31</sub>H<sub>22</sub>F<sub>3</sub>N<sub>3</sub>S [M+H]<sup>+</sup> 560.1170, found 560.1173.

(2*R*,3*S*,4*S*)-3-(3-bromophenyl)-2-(4-chlorophenyl)-4-(1*H*-indol-3-yl)-3,4-dihydro-2*H*-benzo[4,5]thiazolo[3,2-*a*]pyrimidine **3cg**:

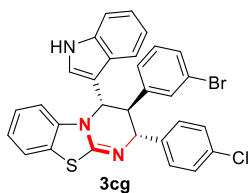

White solid, M.p.: 162-163 °C; yield: 81%;  $[\alpha]_D^{20} = +85$  (*c* 0.32, CH<sub>2</sub>Cl<sub>2</sub>); HPLC (Chiralpak ID, *i*-propanol/hexane = 10/90, flow rate 1.0 mL/min,  $\lambda = 254$  nm),  $t_1 = 12.83$  min (minor),  $t_2 = 20.45$  min (major), ee = 99%; <sup>1</sup>H NMR (400 M, d<sub>6</sub>-DMSO)  $\delta$  ppm:



10.93 (s, 1H), 7.51-7.41 (m, 1H), 7.39-7.20 (m, 6H), 7.12-7.09 (m, 3H), 7.05-6.93 (m, 3H), 6.90-6.81 (m, 3H), 6.59 (d,  $J = 6.9$  Hz, 1H), 5.78 (d,  $J = 10.1$  Hz, 1H), 4.91 (d,  $J = 10.2$  Hz, 1H), 3.25 (t,  $J = 10.2$  Hz, 1H);  $^{13}\text{C}$  NMR (100 MHz,  $d_6$ -DMSO)  $\delta$  ppm: 158.2, 143.1, 142.6, 140.4, 136.8, 131.7, 131.3, 130.5, 129.9, 129.9, 128.5, 128.0, 125.8, 125.6, 125.0, 122.2, 122.2, 122.0, 121.8, 121.6, 119.6, 118.1, 112.5, 112.1, 111.0, 63.8, 57.5, 53.4; HRMS (ESI) Calcd. For  $\text{C}_{30}\text{H}_{22}\text{BrClN}_3\text{S}$   $[\text{M}+\text{H}]^+$  570.0401, found 570.0401.

(2*R*,3*S*,4*S*)-2-(4-chlorophenyl)-4-(1*H*-indol-3-yl)-3-(*m*-tolyl)-3,4-dihydro-2*H*-benzo[4,5]thiazolo[3,2-*a*]pyrimidine **3ch**:

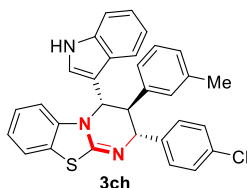

White solid, M.p.: 137-138 °C; yield: 77%;  $[\alpha]_D^{20} = +127$  ( $c$  0.26,  $\text{CH}_2\text{Cl}_2$ ); HPLC (Chiralpak ID, *i*-propanol/hexane = 10/90, flow rate 1.0 mL/min,  $\lambda = 254$  nm),  $t_1 = 23.49$  min (minor),  $t_2 = 28.43$  min (major), ee = 98%;  $^1\text{H}$  NMR (400 M,  $d_6$ -DMSO)  $\delta$  ppm: 10.84 (s, 1H), 7.45-7.43 (m, 1H), 7.33-7.25 (m, 2H), 7.14-7.03 (m, 2H), 7.01-6.97 (m, 4H), 6.94-6.89 (m, 2H), 6.86-6.73 (m, 4H), 6.59 (d,  $J = 7.0$  Hz, 1H), 5.70 (d,  $J = 9.9$  Hz, 1H), 4.82 (d,  $J = 10.1$  Hz, 1H), 3.17 (t,  $J = 10.0$  Hz, 1H), 2.10 (s, 3H);  $^{13}\text{C}$  NMR (100 MHz,  $d_6$ -DMSO)  $\delta$  ppm: 158.2, 142.9, 140.2, 137.3, 136.8, 131.1, 129.9, 129.7, 128.3, 127.8, 127.7, 126.4, 125.8, 125.6, 125.0, 122.2, 122.2, 121.9, 121.5, 119.5, 118.2, 112.4, 112.1, 111.4, 64.0, 57.9, 53.3, 21.4; HRMS (ESI) Calcd. For  $\text{C}_{31}\text{H}_{25}\text{ClN}_3\text{S}$   $[\text{M}+\text{H}]^+$  506.1452, found 506.1452.

(2*R*,3*S*,4*S*)-2-(4-chlorophenyl)-4-(1*H*-indol-3-yl)-3-(*o*-tolyl)-3,4-dihydro-2*H*-benzo[4,5]thiazolo[3,2-*a*]pyrimidine **3ci**:

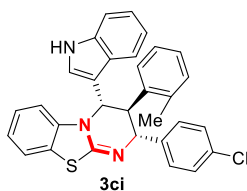

White solid, M.p.: 132-133 °C; yield: 64%;  $[\alpha]_D^{20} = +109$  ( $c$  0.23,  $\text{CH}_2\text{Cl}_2$ ); HPLC (Chiralpak ID, *i*-propanol/hexane = 10/90, flow rate 1.0 mL/min,  $\lambda = 254$  nm),  $t_1 = 22.74$  min (minor),  $t_2 = 24.95$  min (major), ee = 95%;  $^1\text{H}$  NMR (400 M,  $d_6$ -DMSO)  $\delta$  ppm: 10.87 (s, 1H), 7.77-7.68 (m, 1H), 7.62-7.43 (m, 1H), 7.41-7.21 (m, 3H), 7.17-7.05 (m, 2H), 7.03-6.81 (m, 8H), 6.64 (d,  $J = 7.6$  Hz, 1H), 5.67 (d,  $J = 10.2$  Hz, 1H), 4.87 (d,  $J = 10.5$  Hz, 1H), 3.54 (t,  $J = 10.4$  Hz, 1H), 0.96 (s, 3H);  $^{13}\text{C}$  NMR (100 MHz,  $d_6$ -DMSO)  $\delta$  ppm: 158.2, 147.8, 140.4, 139.1, 137.4, 136.7, 131.2, 129.8, 129.6, 128.0, 127.7, 126.6, 125.5, 125.2, 122.2, 122.2, 121.9, 121.6, 119.7, 118.0, 112.4, 112.2, 111.0, 64.1, 58.4, 47.7, 18.9; HRMS (ESI) Calcd. For  $\text{C}_{31}\text{H}_{25}\text{ClN}_3\text{S}$   $[\text{M}+\text{H}]^+$  506.1452, found 506.1455.

(2*R*,3*S*,4*S*)-4-(4-chloro-1*H*-indol-3-yl)-2-(4-chlorophenyl)-3-phenyl-3,4-dihydro-2*H*-benzo[4,5]thiazolo[3,2-*a*]pyrimidine **3cj**:

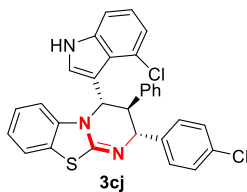

White solid, M.p.: 168-169 °C; yield: 75%;  $[\alpha]_D^{20} = +40$  (*c* 0.12, CH<sub>2</sub>Cl<sub>2</sub>); HPLC (Chiralpak ID, *i*-propanol/hexane = 20/80, flow rate 1.0 mL/min,  $\lambda = 254$  nm),  $t_1 = 12.14$  min (major),  $t_2 = 16.17$  min (minor), ee = >99%; <sup>1</sup>H NMR (400 M, d<sub>6</sub>-DMSO)  $\delta$  ppm: 10.83 (s, 1H), 7.77-7.45 (m, 1H), 7.31-7.23 (m, 2H), 7.14-6.98 (m, 8H), 6.95-6.91 (m, 3H), 6.88-6.78 (m, 2H), 6.42 (d, *J* = 8.2 Hz, 1H), 5.66 (d, *J* = 10.1 Hz, 1H), 4.81 (d, *J* = 10.4 Hz, 1H), 3.17 (t, *J* = 10.2 Hz, 1H); <sup>13</sup>C NMR (100 MHz, d<sub>6</sub>-DMSO)  $\delta$  ppm: 157.7, 142.5, 140.0, 139.8, 134.9, 130.9, 129.7, 129.0, 128.2, 127.6, 127.1, 126.8, 126.0, 125.4, 123.7, 122.1, 121.9, 121.8, 121.3, 117.2, 113.6, 111.7, 111.3, 63.7, 57.2, 53.5; HRMS (ESI) Calcd. For C<sub>30</sub>H<sub>22</sub>Cl<sub>2</sub>N<sub>3</sub>S [M+H]<sup>+</sup> 526.0906, found 526.0906.

(2*R*,3*S*,4*S*)-4-(5-chloro-1*H*-indol-3-yl)-2-(4-chlorophenyl)-3-phenyl-3,4-dihydro-2*H*-benzo[4,5]thiazolo[3,2-*a*]pyrimidine **3ck**:

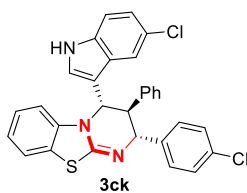

White solid, M.p.: 177-178 °C; yield: 76%;  $[\alpha]_D^{20} = +97$  (*c* 0.1, CH<sub>2</sub>Cl<sub>2</sub>); HPLC (Chiralpak ID, *i*-propanol/hexane = 20/80, flow rate 1.0 mL/min,  $\lambda = 254$  nm),  $t_1 = 12.51$  min (minor),  $t_2 = 14.36$  min (major), ee = 98%; <sup>1</sup>H NMR (400 M, d<sub>6</sub>-DMSO)  $\delta$  ppm: 11.07 (s, 1H), 7.51-7.41 (m, 1H), 7.31-7.17 (m, 2H), 7.14-7.04 (m, 8H), 6.99-6.97 (m, 1H), 6.91-6.80 (m, 4H), 6.46 (d, *J* = 6.8 Hz, 1H), 5.73 (d, *J* = 10.0 Hz, 1H), 4.87 (d, *J* = 10.2 Hz, 1H), 3.11 (t, *J* = 10.0 Hz, 1H); <sup>13</sup>C NMR (100 MHz, d<sub>6</sub>-DMSO)  $\delta$  ppm: 158.0, 142.7, 140.2, 140.0, 135.1, 131.2, 129.9, 129.3, 128.5, 127.9, 127.3, 127.1, 126.2, 125.6, 124.0, 122.3, 122.2, 122.0, 121.6, 117.4, 113.9, 112.0, 111.5, 63.9, 57.4, 53.8; HRMS (ESI) Calcd. For C<sub>30</sub>H<sub>22</sub>Cl<sub>2</sub>N<sub>3</sub>S [M+H]<sup>+</sup> 526.0906, found 526.0909.

(2*R*,3*S*,4*S*)-2-(4-chlorophenyl)-4-(5-methyl-1*H*-indol-3-yl)-3-phenyl-3,4-dihydro-2*H*-benzo[4,5]thiazolo[3,2-*a*]pyrimidine **3cl**:

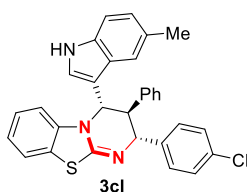

White solid, M.p.: 145-146 °C; yield: 64%;  $[\alpha]_D^{20} = +175$  (*c* 0.24, CH<sub>2</sub>Cl<sub>2</sub>); HPLC (Chiralpak ID, *i*-propanol/hexane = 20/80, flow rate 1.0 mL/min,  $\lambda = 254$  nm),  $t_1 = 14.79$

min (minor),  $t_2 = 16.59$  min (major), ee = 99%;  $^1\text{H}$  NMR (400 M,  $d_6$ -DMSO)  $\delta$  ppm: 10.72 (s, 1H), 7.45-7.43 (m, 1H), 7.15-7.12 (dn, 3H), 7.07-6.99 (m, 6H), 6.89-6.74 (m, 6H), 6.56 (d,  $J = 7.0$  Hz, 1H), 5.67 (d,  $J = 10.0$  Hz, 1H), 4.86 (d,  $J = 10.2$  Hz, 1H), 3.19 (t,  $J = 10.1$  Hz, 1H), 2.29 (s, 3H);  $^{13}\text{C}$  NMR (100 MHz,  $d_6$ -DMSO)  $\delta$  ppm: 158.2, 142.9, 140.5, 140.3, 135.2, 131.2, 129.9, 129.2, 128.4, 127.9, 127.8, 127.0, 125.7, 125.5, 125.3, 123.2, 122.2, 121.9, 117.9, 112.1, 112.1, 110.9, 64.0, 58.6, 53.5, 22.0; HRMS (ESI) Calcd. For  $\text{C}_{31}\text{H}_{25}\text{ClN}_3\text{S}$   $[\text{M}+\text{H}]^+$  506.1452, found 506.1457.

(2*R*,3*S*,4*S*)-2-(4-chlorophenyl)-4-(6-fluoro-1*H*-indol-3-yl)-3-phenyl-3,4-dihydro-2*H*-benzo[4,5]thiazolo[3,2-*a*]pyrimidine **3cm**:

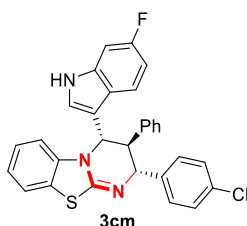

White solid, M.p.: 177-178 °C; yield: 74%;  $[\alpha]_D^{20} = +83$  ( $c$  0.21,  $\text{CH}_2\text{Cl}_2$ ); HPLC (Chiralpak ID, *i*-propanol/hexane = 10/90, flow rate 1.0 mL/min,  $\lambda = 254$  nm),  $t_1 = 21.18$  min (minor),  $t_2 = 23.53$  min (major), ee = >99%;  $^1\text{H}$  NMR (400 M,  $d_6$ -DMSO)  $\delta$  ppm: 10.92 (s, 1H), 7.47-7.44 (m, 1H), 7.33-7.18 (m, 1H), 7.14-7.02 (m, 8H), 6.97-6.76 (m, 6H), 6.54 (d,  $J = 7.2$  Hz, 1H), 5.72 (d,  $J = 10.0$  Hz, 1H), 4.87 (d,  $J = 10.2$  Hz, 1H), 3.17 (t,  $J = 10.0$  Hz, 1H);  $^{13}\text{C}$  NMR (100 MHz,  $d_6$ -DMSO)  $\delta$  ppm: 159.1 (d,  $J = 233.3$  Hz), 158.1, 142.8, 140.4, 140.1, 136.7, 136.6, 131.2, 129.9, 129.2, 128.5, 127.9, 127.0, 126.3, 125.6, 122.3, 122.2, 122.0, 119.2, 119.1, 111.8 (d,  $J = 35.8$  Hz), 108.1 (d,  $J = 24.3$  Hz), 98.5, 98.3, 63.8, 57.7, 53.6;  $^{19}\text{F}$  NMR (376 MHz,  $d_6$ -DMSO)  $\delta$  ppm: -121.83; HRMS (ESI) Calcd. For  $\text{C}_{30}\text{H}_{22}\text{ClFN}_3\text{S}$   $[\text{M}+\text{H}]^+$  510.1202, found 510.1199.

(2*R*,3*S*,4*S*)-4-(6-chloro-1*H*-indol-3-yl)-2-(4-chlorophenyl)-3-phenyl-3,4-dihydro-2*H*-benzo[4,5]thiazolo[3,2-*a*]pyrimidine **3cn**:

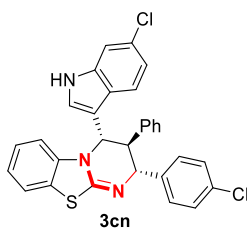

White solid, M.p.: 162-163 °C; yield: 80%;  $[\alpha]_D^{20} = +122$  ( $c$  0.24,  $\text{CH}_2\text{Cl}_2$ ); HPLC (Chiralpak ID, *i*-propanol/hexane = 20/80, flow rate 1.0 mL/min,  $\lambda = 254$  nm),  $t_1 = 11.35$  min (minor),  $t_2 = 12.65$  min (major), ee = 99%;  $^1\text{H}$  NMR (400 M,  $d_6$ -DMSO)  $\delta$  ppm: 11.00 (s, 1H), 7.46-7.44 (m, 1H), 7.32-7.23 (m, 2H), 7.17-7.08 (m, 2H), 7.06-7.01 (m, 6H), 6.94-6.79 (m, 5H), 6.49 (d,  $J = 6.7$  Hz, 1H), 5.72 (d,  $J = 10.0$  Hz, 1H), 4.87 (d,  $J = 10.2$  Hz, 1H), 3.14 (t,  $J = 10.1$  Hz, 1H);  $^{13}\text{C}$  NMR (100 MHz,  $d_6$ -DMSO)  $\delta$  ppm: 158.0, 142.8, 140.3, 140.0, 133.5, 131.2, 129.9, 129.2, 128.5, 127.9, 127.1, 125.7, 122.3, 122.2, 122.0, 121.3, 121.2, 120.7, 117.3, 116.6, 112.9, 112.0, 63.8, 57.6, 53.6; HRMS (ESI) Calcd. For  $\text{C}_{30}\text{H}_{22}\text{Cl}_2\text{N}_3\text{S}$   $[\text{M}+\text{H}]^+$  526.0906, found 526.0911.

(2*R*,3*S*,4*S*)-4-(6-bromo-1*H*-indol-3-yl)-2-(4-chlorophenyl)-3-phenyl-3,4-dihydro-2*H*-benzo[4,5]thiazolo[3,2-*a*]pyrimidine **3co**:

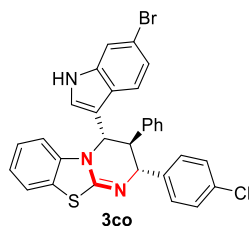

White solid, M.p.: 196-197 °C; yield: 80%;  $[\alpha]^{20}_D = +106$  (*c* 0.28, CH<sub>2</sub>Cl<sub>2</sub>); HPLC (Chiralpak ID, *i*-propanol/hexane = 20/80, flow rate 1.0 mL/min,  $\lambda = 254$  nm),  $t_1 = 11.80$  min (minor),  $t_2 = 13.31$  min (major), ee = >99%; <sup>1</sup>H NMR (400 M, d<sub>6</sub>-DMSO)  $\delta$  ppm: 11.01 (s, 1H), 7.45-7.42 (m, 2H), 7.22-7.10 (m, 1H), 7.12-6.99 (m, 9H), 6.86-6.77 (m, 4H), 6.48 (d, *J* = 6.7 Hz, 1H), 5.70 (d, *J* = 10.0 Hz, 1H), 4.84 (d, *J* = 10.1 Hz, 1H), 3.14 (t, *J* = 10.0 Hz, 1H); <sup>13</sup>C NMR (100 MHz, d<sub>6</sub>-DMSO)  $\delta$  ppm: 158.1, 142.7, 140.3, 140.0, 137.6, 131.2, 129.9, 129.2, 128.5, 127.9, 127.1, 126.7, 125.6, 124.1, 122.4, 122.2, 122.1, 119.9, 115.0, 114.5, 112.0, 111.9, 63.9, 57.6, 53.6; HRMS (ESI) Calcd. For C<sub>30</sub>H<sub>22</sub>BrClN<sub>3</sub>S [M+H]<sup>+</sup> 570.0401, found 570.0405.

(2*R*,3*S*,4*S*)-2-(4-chlorophenyl)-4-(6-methyl-1*H*-indol-3-yl)-3-phenyl-3,4-dihydro-2*H*-benzo[4,5]thiazolo[3,2-*a*]pyrimidine **3cp**:

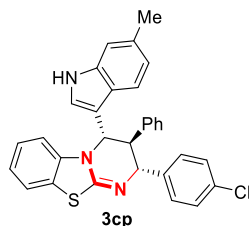

White solid, M.p.: 158-159 °C; yield: 72%;  $[\alpha]^{20}_D = +154$  (*c* 0.32, CH<sub>2</sub>Cl<sub>2</sub>); HPLC (Chiralpak ID, *i*-propanol/hexane = 20/80, flow rate 1.0 mL/min,  $\lambda = 254$  nm),  $t_1 = 13.24$  min (minor),  $t_2 = 15.68$  min (major), ee = 98%; <sup>1</sup>H NMR (400 M, d<sub>6</sub>-DMSO)  $\delta$  ppm: 10.79 (s, 1H), 7.42-7.12 (m, 2H), 7.09-6.96 (m, 9H), 6.93-6.67 (m, 4H), 6.58 (d, *J* = 7.6 Hz, 1H), 6.44 (d, *J* = 8.2 Hz, 1H), 5.65 (d, *J* = 10.0 Hz, 1H), 4.81 (d, *J* = 10.4 Hz, 1H), 3.20 (t, *J* = 10.2 Hz, 1H), 2.11 (s, 3H); <sup>13</sup>C NMR (100 MHz, d<sub>6</sub>-DMSO)  $\delta$  ppm: 158.4, 142.8, 140.4, 140.1, 137.2, 131.2, 130.7, 129.8, 129.2, 128.4, 127.9, 127.0, 125.5, 125.0, 122.8, 122.2, 122.1, 122.0, 121.4, 117.9, 112.2, 63.9, 58.1, 21.7; HRMS (ESI) Calcd. For C<sub>31</sub>H<sub>25</sub>ClN<sub>3</sub>S [M+H]<sup>+</sup> 506.1452, found 506.1455.

(2*R*,3*S*,4*S*)-2-(4-chlorophenyl)-4-(6-methoxy-1*H*-indol-3-yl)-3-phenyl-3,4-dihydro-2*H*-benzo[4,5]thiazolo[3,2-*a*]pyrimidine **3cq**:

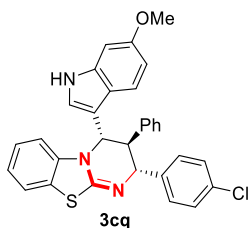

White solid, M.p.: 152-153 °C; yield: 78%;  $[\alpha]^{20}_D = +141$  (*c* 0.34, CH<sub>2</sub>Cl<sub>2</sub>); HPLC (Chiralpak ID, *i*-propanol/hexane = 10/90, flow rate 1.0 mL/min,  $\lambda = 254$  nm),  $t_1 = 20.39$  min (minor),  $t_2 = 25.82$  min (major), ee = 99%; <sup>1</sup>H NMR (400 M, d<sub>6</sub>-DMSO)  $\delta$  ppm: 10.64 (s, 1H), 7.45-7.39 (m, 1H), 7.18-7.12 (m, 3H), 7.08-7.01 (m, 5H), 6.86-6.76 (m, 6H), 6.59-6.56 (m, 2H), 5.65 (d, *J* = 10.0 Hz, 1H), 4.85 (d, *J* = 10.3 Hz, 1H), 3.69 (s, 3H), 3.17 (t, *J* = 10.1 Hz, 1H); <sup>13</sup>C NMR (100 MHz, d<sub>6</sub>-DMSO)  $\delta$  ppm: 158.1, 155.8, 142.9, 140.5, 137.6, 131.2, 129.8, 129.2, 128.4, 127.9, 127.0, 125.6, 124.4, 122.2, 122.2, 121.9, 119.3, 118.8, 112.1, 111.3, 109.7, 95.4, 64.0, 58.0, 55.4, 53.7; HRMS (ESI) Calcd. For C<sub>31</sub>H<sub>25</sub>ClN<sub>3</sub>OS [M+H]<sup>+</sup> 522.1401, found 522.1406.

(2*R*,3*S*,4*S*)-4-(7-chloro-1*H*-indol-3-yl)-2-(4-chlorophenyl)-3-phenyl-3,4-dihydro-2*H*-benzo[4,5]thiazolo[3,2-*a*]pyrimidine **3cr**:

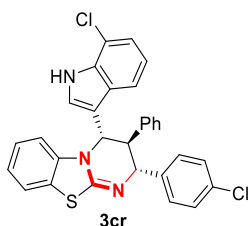

White solid, M.p.: 145-146 °C; yield: 64%;  $[\alpha]^{20}_D = +120$  (*c* 0.2, CH<sub>2</sub>Cl<sub>2</sub>); HPLC (Chiralpak ID, *i*-propanol/hexane = 20/80, flow rate 1.0 mL/min,  $\lambda = 254$  nm),  $t_1 = 9.36$  min (minor),  $t_2 = 11.36$  min (major), ee = >99%; <sup>1</sup>H NMR (400 M, d<sub>6</sub>-DMSO)  $\delta$  ppm: 11.29 (s, 1H), 7.50-7.45 (m, 1H), 7.30-7.22 (m, 1H), 7.17-7.04 (m, 9H), 6.98-6.83 (m, 5H), 6.56 (d, *J* = 6.0 Hz, 1H), 5.79 (d, *J* = 10.0 Hz, 1H), 4.91 (d, *J* = 10.2 Hz, 1H), 3.20 (t, *J* = 10.0 Hz, 1H); <sup>13</sup>C NMR (100 MHz, d<sub>6</sub>-DMSO)  $\delta$  ppm: 158.0, 142.8, 140.3, 140.0, 133.5, 131.2, 129.9, 129.2, 128.5, 127.9, 127.1, 125.7, 122.3, 122.2, 122.0, 121.3, 121.2, 120.7, 117.3, 116.6, 112.9, 112.0, 63.8, 57.6, 53.6; HRMS (ESI) Calcd. For C<sub>30</sub>H<sub>22</sub>Cl<sub>2</sub>N<sub>3</sub>S [M+H]<sup>+</sup> 526.0906, found 526.0908.

(2*R*,3*S*,4*S*)-2-(4-chlorophenyl)-4-(7-methyl-1*H*-indol-3-yl)-3-phenyl-3,4-dihydro-2*H*-benzo[4,5]thiazolo[3,2-*a*]pyrimidine **3cs**:

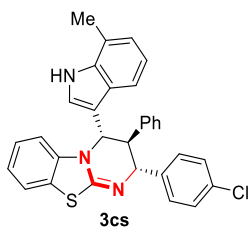

White solid, M.p.: 134-135 °C; yield: 74%;  $[\alpha]^{20}_D = +174$  (*c* 0.21, CH<sub>2</sub>Cl<sub>2</sub>); HPLC (Chiralpak ID, *i*-propanol/hexane = 10/90, flow rate 1.0 mL/min,  $\lambda = 254$  nm),  $t_1 = 27.07$

min (minor),  $t_2 = 30.78$  min (major), ee = >99%;  $^1\text{H}$  NMR (400 M,  $d_6$ -DMSO)  $\delta$  ppm: 10.82 (s, 1H), 7.45-7.42 (m, 1H), 7.19-7.11 (m, 3H), 7.08-6.96 (m, 6H), 6.85-6.78 (m, 6H), 6.59 (d,  $J = 6.9$  Hz, 1H), 5.71 (d,  $J = 10.0$  Hz, 1H), 4.84 (d,  $J = 10.2$  Hz, 1H), 3.19 (t,  $J = 10.1$  Hz, 1H), 2.34 (s, 3H);  $^{13}\text{C}$  NMR (100 MHz,  $d_6$ -DMSO)  $\delta$  ppm: 158.2, 142.9, 140.5, 140.3, 136.4, 131.1, 129.9, 129.2, 128.5, 127.9, 127.0, 125.6, 124.6, 122.2, 122.2, 122.1, 121.9, 121.4, 119.8, 115.8, 112.1, 111.8, 64.0, 58.0, 53.6, 17.2; HRMS (ESI) Calcd. For  $\text{C}_{31}\text{H}_{25}\text{ClN}_3\text{S}$   $[\text{M}+\text{H}]^+$  506.1452, found 506.1456.

(2*R*,3*S*,4*S*)-2-(4-chlorophenyl)-4-(2-methyl-1*H*-indol-3-yl)-3-phenyl-3,4-dihydro-2*H*-benzo[4,5]thiazolo[3,2-*a*]pyrimidine **3ct**:

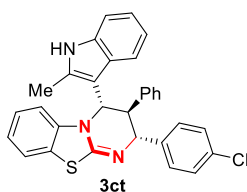

White solid, M.p.: 178-179 °C; yield: 62%;  $[\alpha]_D^{20} = +123$  ( $c$  0.24,  $\text{CH}_2\text{Cl}_2$ ); HPLC (Chiralpak ID, *i*-propanol/hexane = 10/90, flow rate 1.0 mL/min,  $\lambda = 254$  nm),  $t_1 = 7.58$  min (major),  $t_2 = 9.25$  min (minor), ee = 96%;  $^1\text{H}$  NMR (400 M,  $d_6$ -DMSO)  $\delta$  ppm: 10.86 (s, 1H), 7.48-7.44 (m, 1H), 7.38-7.21 (m, 2H), 7.13-6.99 (m, 4H), 6.97-6.90 (m, 5H), 6.86-6.79 (m, 4H), 6.58 (d,  $J = 7.4$  Hz, 1H), 5.69 (d,  $J = 10.1$  Hz, 1H), 4.83 (d,  $J = 10.4$  Hz, 1H), 3.23 (t,  $J = 10.2$  Hz, 1H), 2.17 (s, 3H);  $^{13}\text{C}$  NMR (100 MHz,  $d_6$ -DMSO)  $\delta$  ppm: 157.6, 140.9, 140.7, 140.6, 136.8, 135.4, 129.3, 128.5, 128.3, 128.0, 126.8, 125.7, 125.5, 125.0, 122.3, 122.1, 121.8, 121.5, 119.5, 118.2, 112.4, 112.0, 111.5, 64.3, 58.1, 53.6, 21.1; HRMS (ESI) Calcd. For  $\text{C}_{31}\text{H}_{25}\text{ClN}_3\text{S}$   $[\text{M}+\text{H}]^+$  506.1452, found 506.1456.

(2*R*,3*S*,4*S*)-2-(4-chlorophenyl)-4-(1-methyl-1*H*-indol-3-yl)-3-phenyl-3,4-dihydro-2*H*-benzo[4,5]thiazolo[3,2-*a*]pyrimidine **4**:

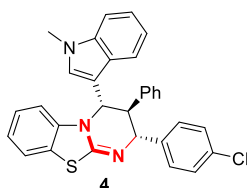

White solid, M.p.: 178-179 °C; yield: 86%;  $[\alpha]_D^{20} = +123$  ( $c$  0.24,  $\text{CH}_2\text{Cl}_2$ ); HPLC (Chiralpak ID, *i*-propanol/hexane = 10/90, flow rate 1.0 mL/min,  $\lambda = 254$  nm),  $t_1 = 13.83$  min (major),  $t_2 = 17.84$  min (minor), ee = >99%;  $^1\text{H}$  NMR (400 M,  $d_6$ -DMSO)  $\delta$  ppm: 7.46-7.42 (m, 1H), 7.34-7.26 (m, 2H), 7.15-7.02 (m, 8H), 6.97-6.79 (m, 6H), 6.55 (d,  $J = 7.3$  Hz, 1H), 5.72 (d,  $J = 9.4$  Hz, 1H), 4.85 (d,  $J = 9.7$  Hz, 1H), 3.54 (s, 3H), 3.23 (t,  $J = 9.6$  Hz, 1H);  $^{13}\text{C}$  NMR (100 MHz,  $d_6$ -DMSO)  $\delta$  ppm: 158.2, 155.9, 143.0, 140.6, 140.4, 137.7, 131.3, 130.0, 129.3, 128.5, 128.0, 127.1, 125.7, 124.5, 122.3, 122.2, 122.0, 119.4, 118.8, 112.2, 111.4, 109.8, 95.5, 64.1, 58.1, 55.5, 53.8; HRMS (ESI) Calcd. For  $\text{C}_{31}\text{H}_{25}\text{ClN}_3\text{S}$   $[\text{M}+\text{H}]^+$  506.1452, found 506.1453.

## 5. Crystallographic data collection for compound 3oa.

Bond precision: C-C = 0.0120 Å Wavelength=1.54184  
Cell: a=8.7321(2) b=15.7556(4) c=9.1821(2)  
alpha=90 beta=100.916(2) gamma=90  
Temperature: 200 K  
Calculated Reported  
Volume 1240.41(5) 1240.41(5)  
Space group P 21 P 1 21 1  
Hall group P 2yb P 2yb  
Moiety formula C<sub>28</sub> H<sub>21</sub> N<sub>3</sub> O S, C H<sub>2</sub> Cl<sub>2</sub> C<sub>28</sub> H<sub>21</sub> N<sub>3</sub> O S, C H<sub>2</sub> Cl<sub>2</sub>  
Sum formula C<sub>29</sub> H<sub>23</sub> Cl<sub>2</sub> N<sub>3</sub> O S C<sub>29</sub> H<sub>23</sub> Cl<sub>2</sub> N<sub>3</sub> O S  
Mr 532.46 532.46  
D<sub>x</sub>, g cm<sup>-3</sup> 1.426 1.426  
Z 2 2  
Mu (mm<sup>-1</sup>) 3.369 3.369  
F<sub>000</sub> 552.0 552.0  
F<sub>000</sub>' 555.40  
h,k,l<sub>max</sub> 10,18,11 10,18,10  
N<sub>ref</sub> 4544[ 2362] 4544  
T<sub>min</sub>, T<sub>max</sub> 0.868,0.904 0.868,0.904  
T<sub>min</sub>' 0.859  
Correction method= # Reported T Limits: T<sub>min</sub>=0.868 T<sub>max</sub>=0.904  
AbsCorr = MULTI-SCAN  
Data completeness= 1.92/1.00 Theta(max)= 68.217  
R(reflections)= 0.0938( 3103)  
wR<sub>2</sub>(reflections)=  
0.2506( 3364)  
S = 1.172 N<sub>par</sub>= 325  
The following ALERTS were generated. Each ALERT has the format  
**test-name\_ALERT\_alert-type\_alert-level**.  
Click on the hyperlinks for more details of the test.

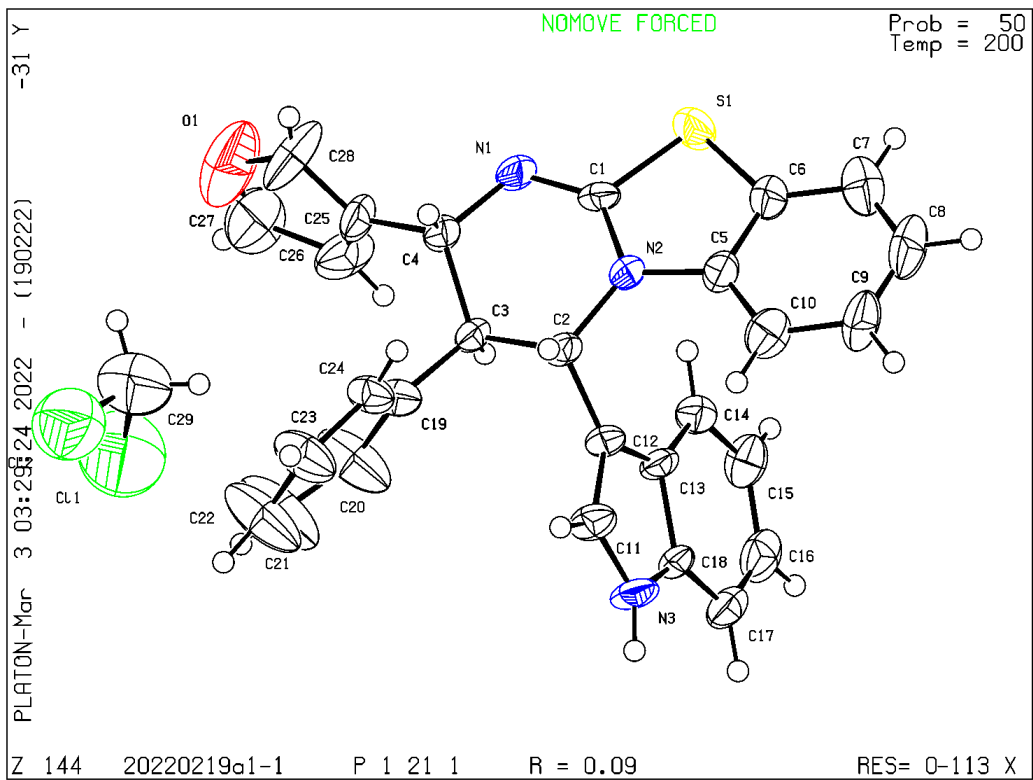



## 6. HPLC spectra of compounds.

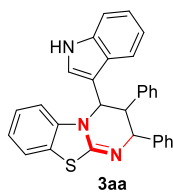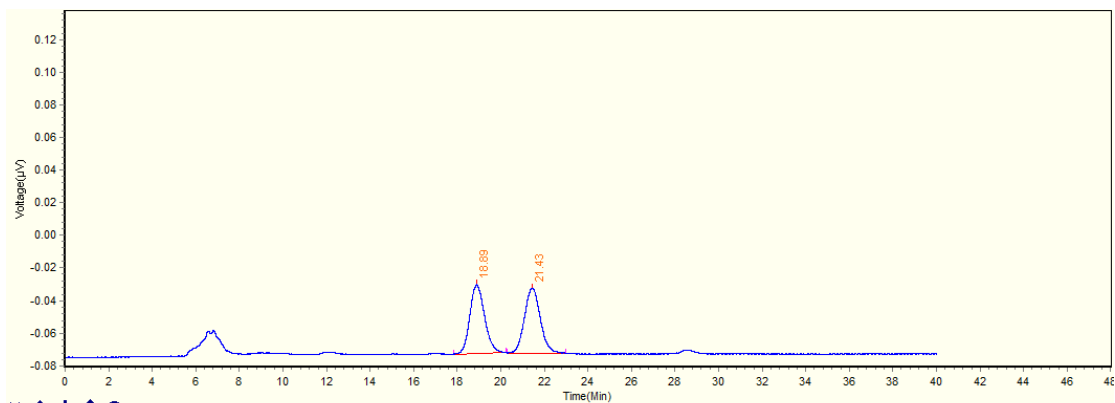

++ ± ± 0

Show

| No.   | Retention Time | Peak Area | Peak Height | Peak Area(%) | Peak Width | Peak Type |
|-------|----------------|-----------|-------------|--------------|------------|-----------|
| 1     | 18.89          | 988777    | 21106       | 49.63%       | 2.404      | BB        |
| 2     | 21.43          | 1003623   | 20003       | 50.37%       | 2.692      | BB        |
| total |                | 1,992,400 | 41,109      | 100.00%      |            |           |

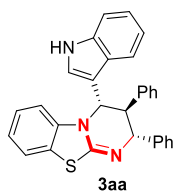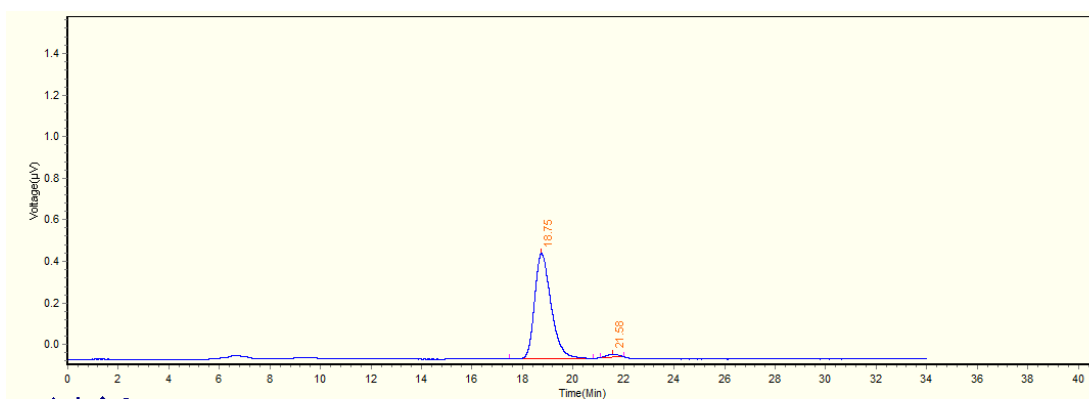

++ ± ± 0

Show

| No.   | Retention Time | Peak Area  | Peak Height | Peak Area(%) | Peak Width | Peak Type |
|-------|----------------|------------|-------------|--------------|------------|-----------|
| 1     | 18.75          | 11466427   | 253719      | 98.11%       | 3.318      | BB        |
| 2     | 21.58          | 220741     | 6639        | 1.89%        | 0.93       | BB        |
| total |                | 11,687,168 | 260,358     | 100.00%      |            |           |

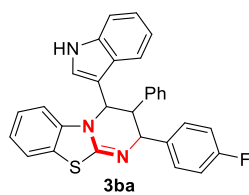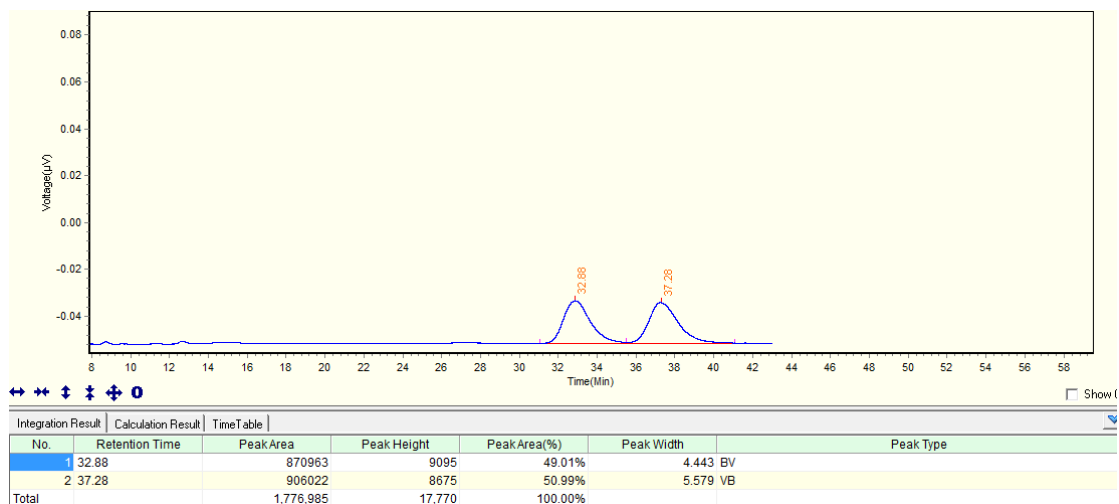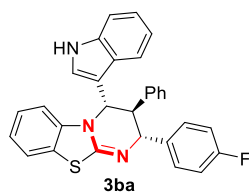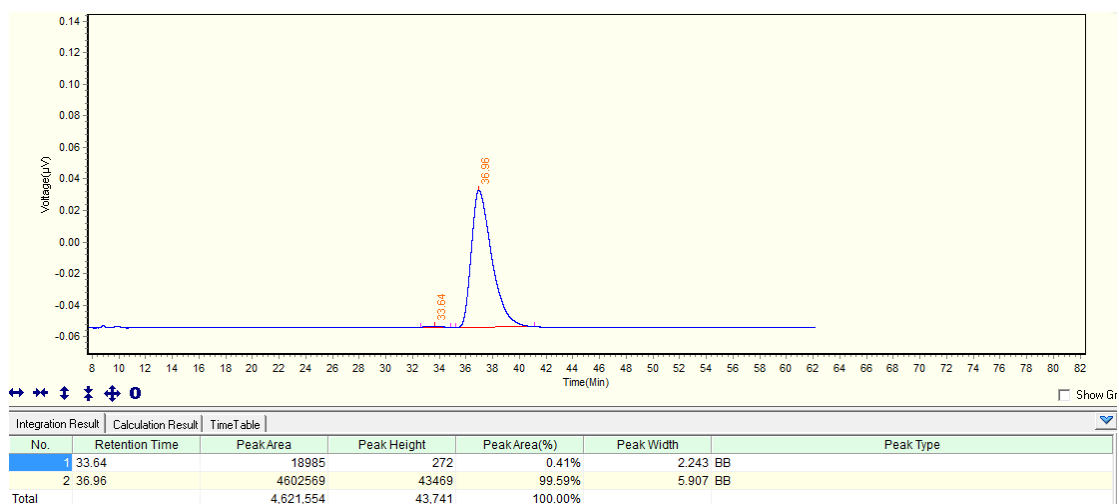

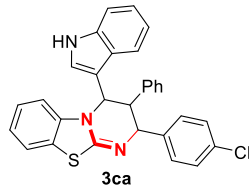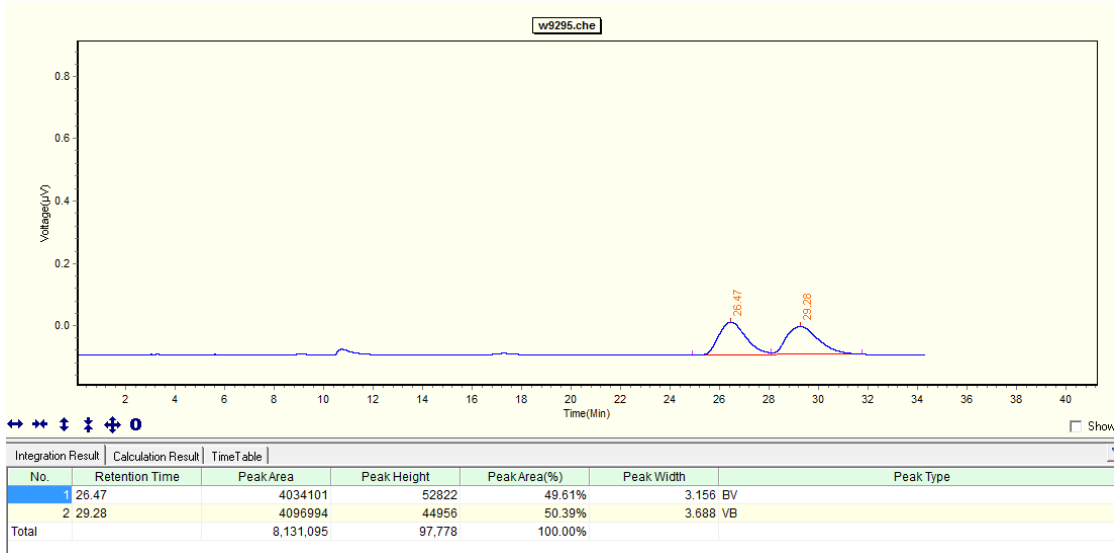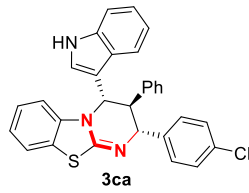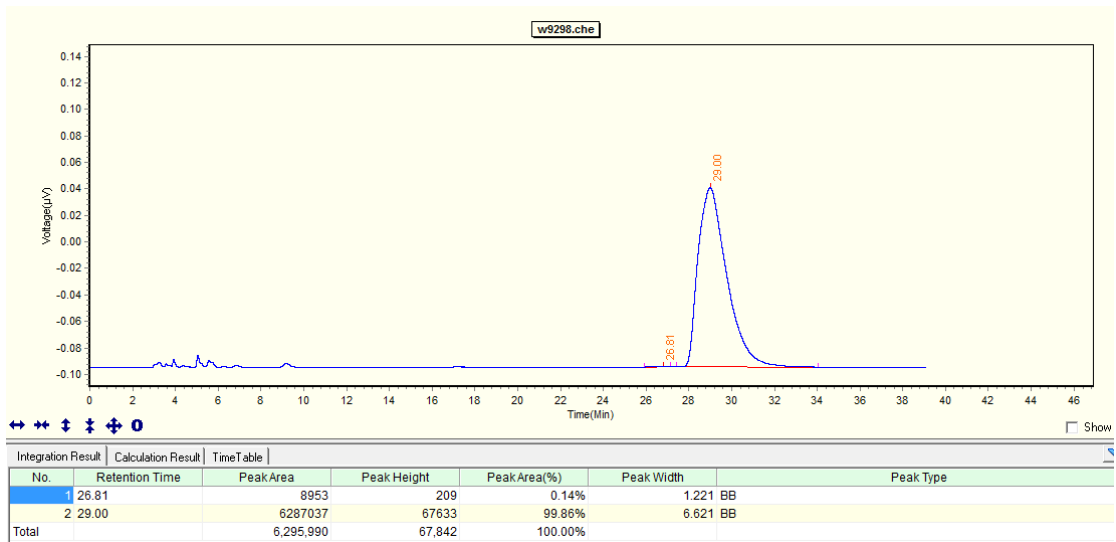

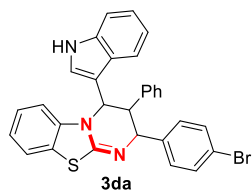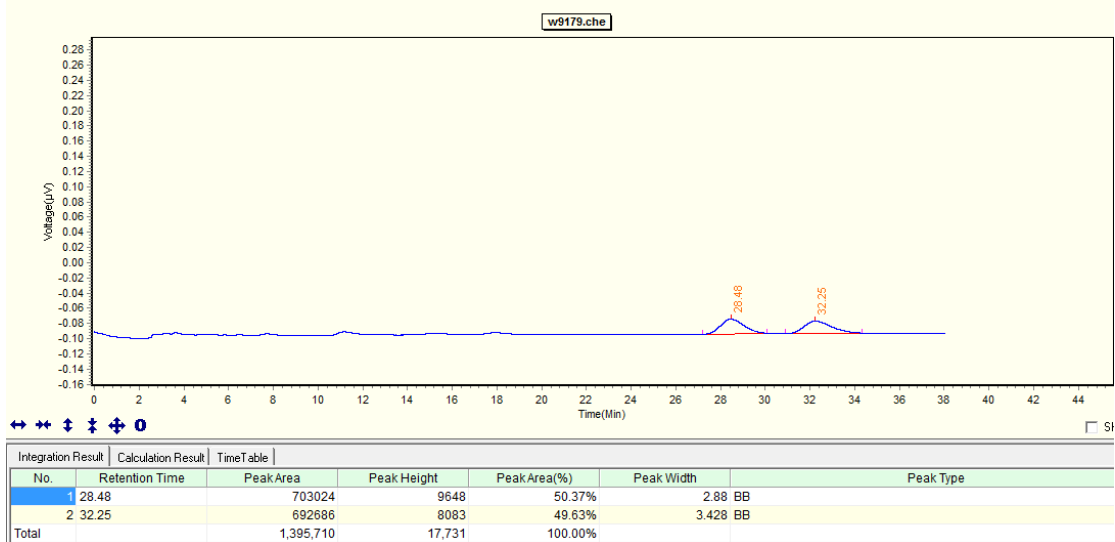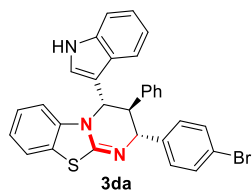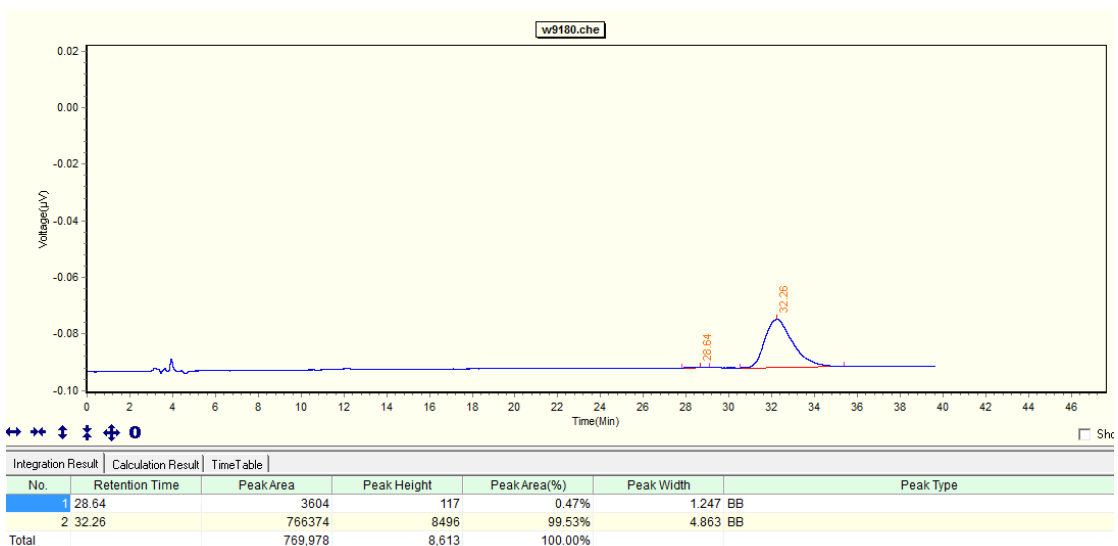

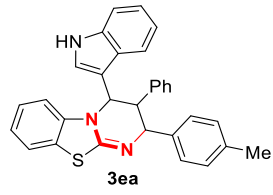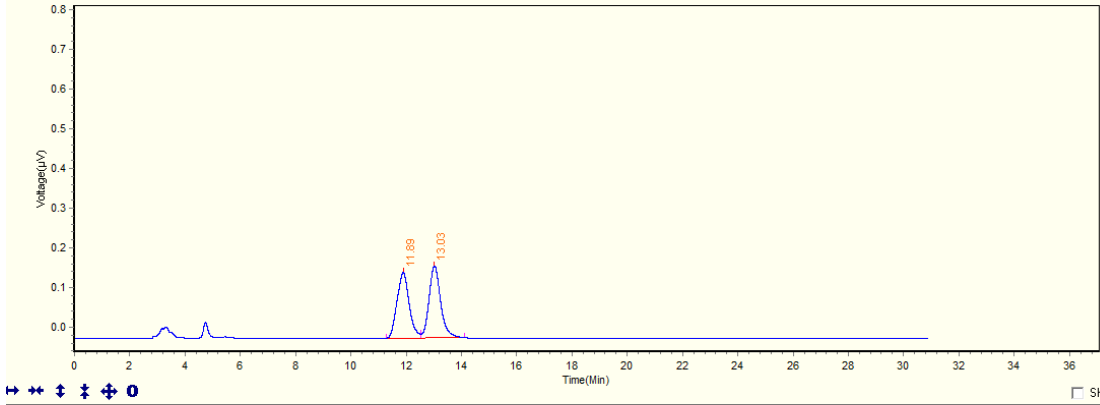

| No.   | Retention Time | Peak Area | Peak Height | Peak Area(%) | Peak Width | Peak Type |
|-------|----------------|-----------|-------------|--------------|------------|-----------|
| 1     | 11.89          | 2531617   | 82478       | 48.91%       | 1.248 BV   |           |
| 2     | 13.03          | 2644687   | 90961       | 51.09%       | 1.581 VB   |           |
| Total |                | 5,176,304 | 173,439     | 100.00%      |            |           |

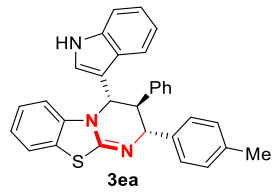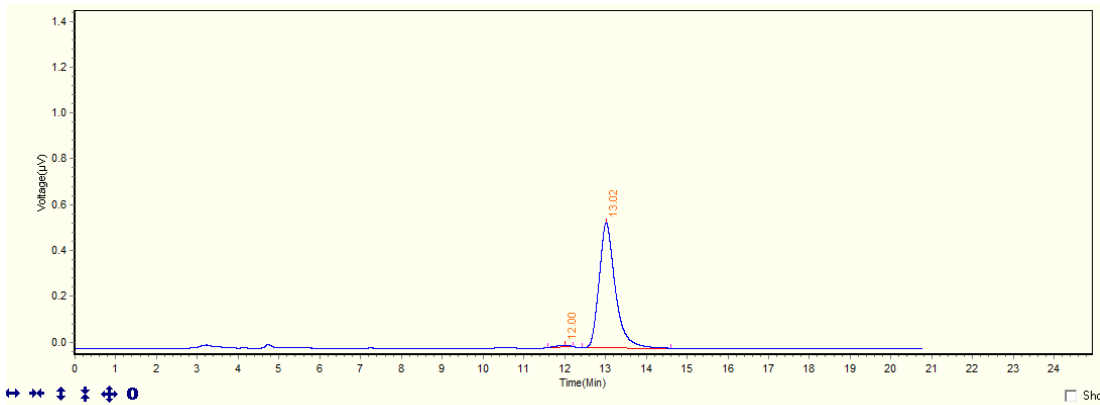

| No.   | Retention Time | Peak Area | Peak Height | Peak Area(%) | Peak Width | Peak Type |
|-------|----------------|-----------|-------------|--------------|------------|-----------|
| 1     | 12.00          | 83344     | 3736        | 1.10%        | 0.618 BB   |           |
| 2     | 13.02          | 7489617   | 273499      | 98.90%       | 2.174 BB   |           |
| Total |                | 7,572,961 | 277,235     | 100.00%      |            |           |

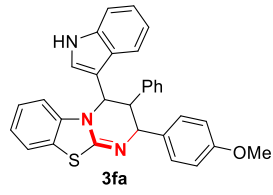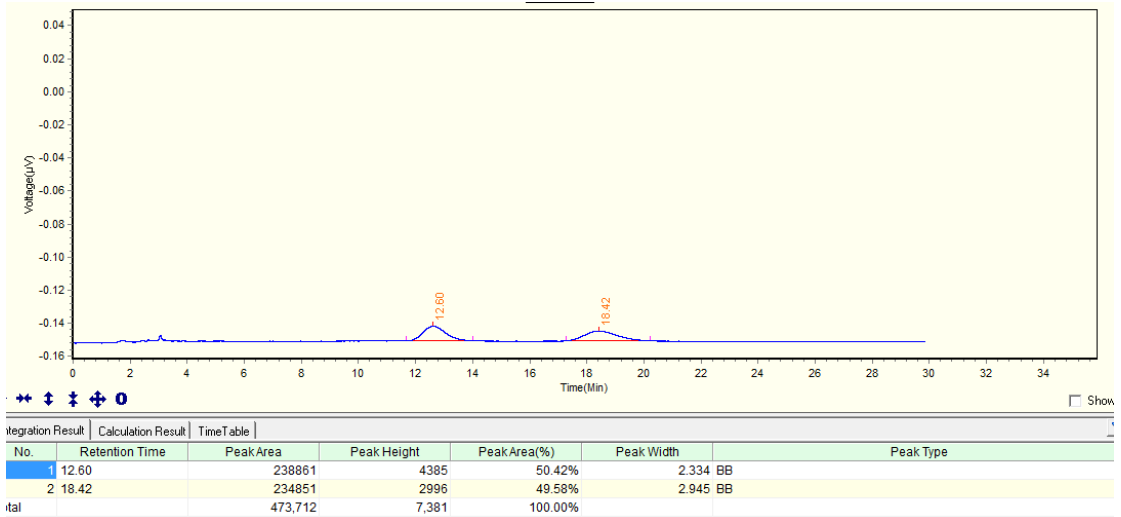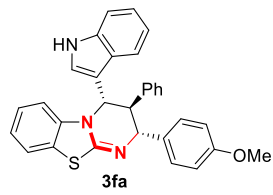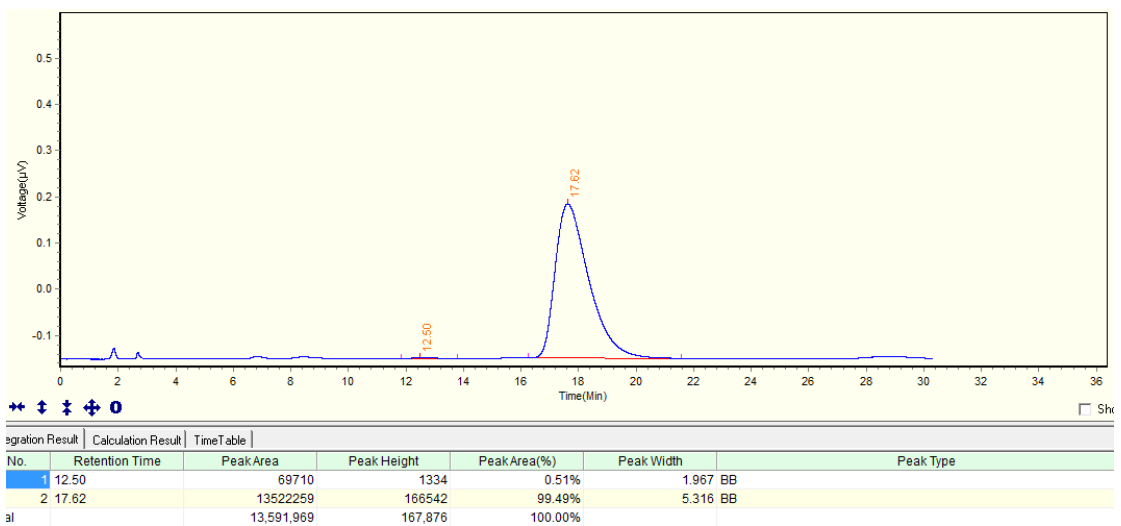

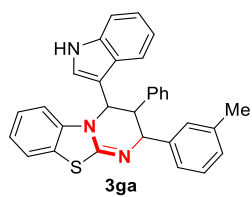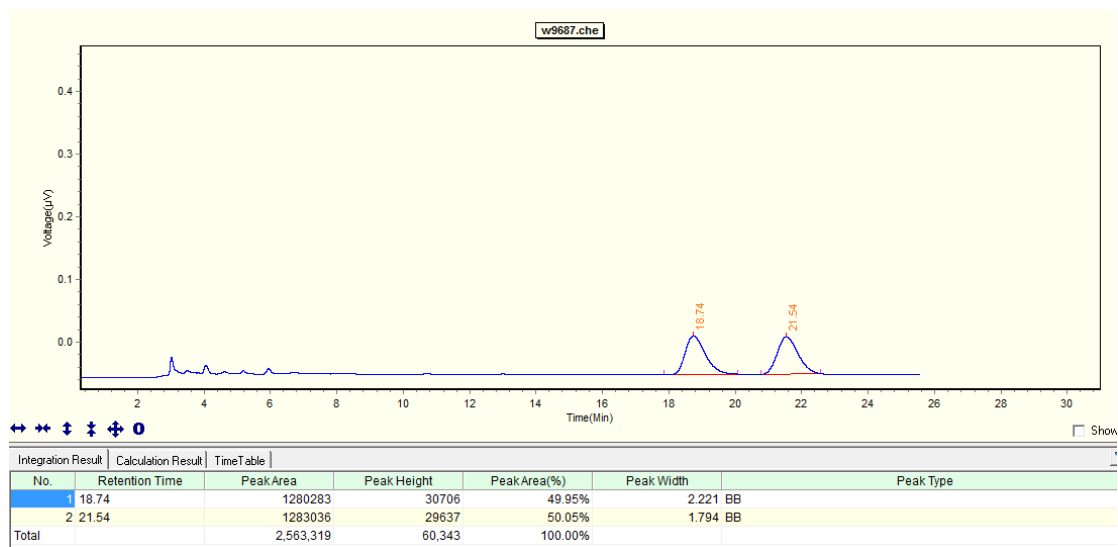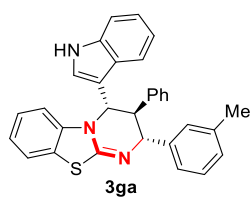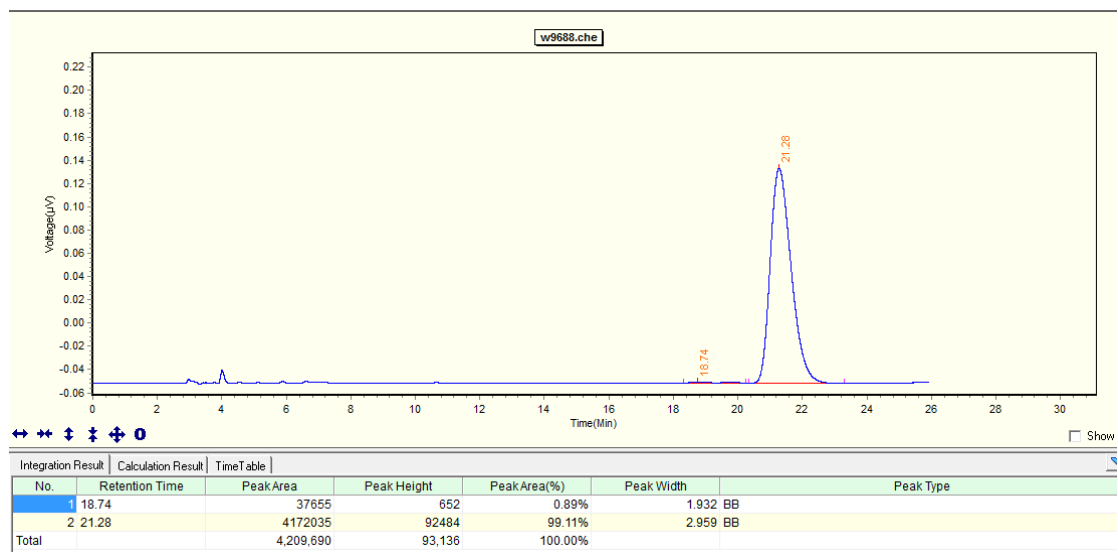

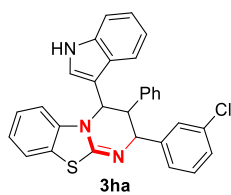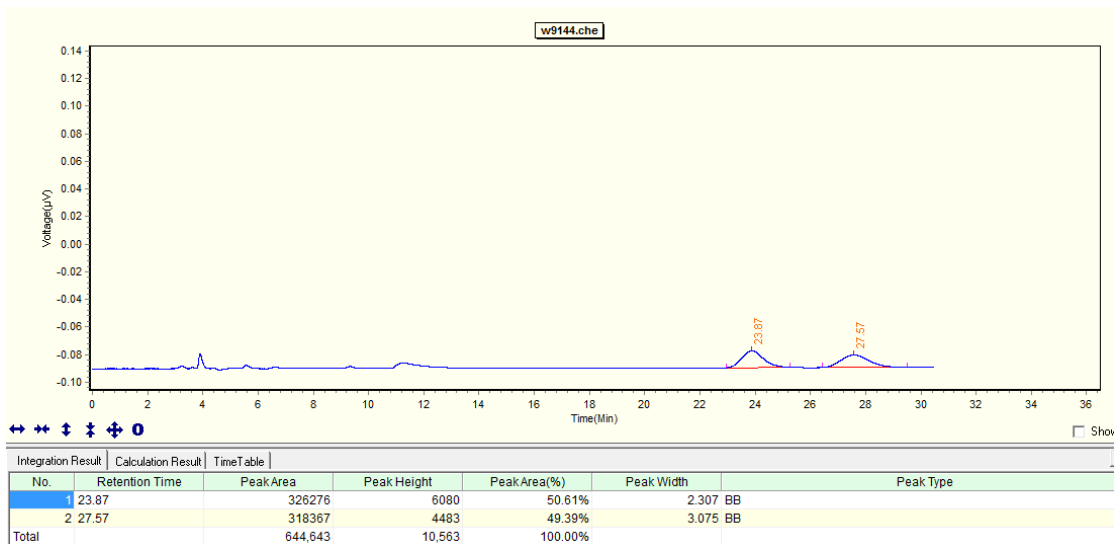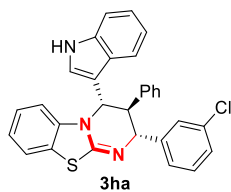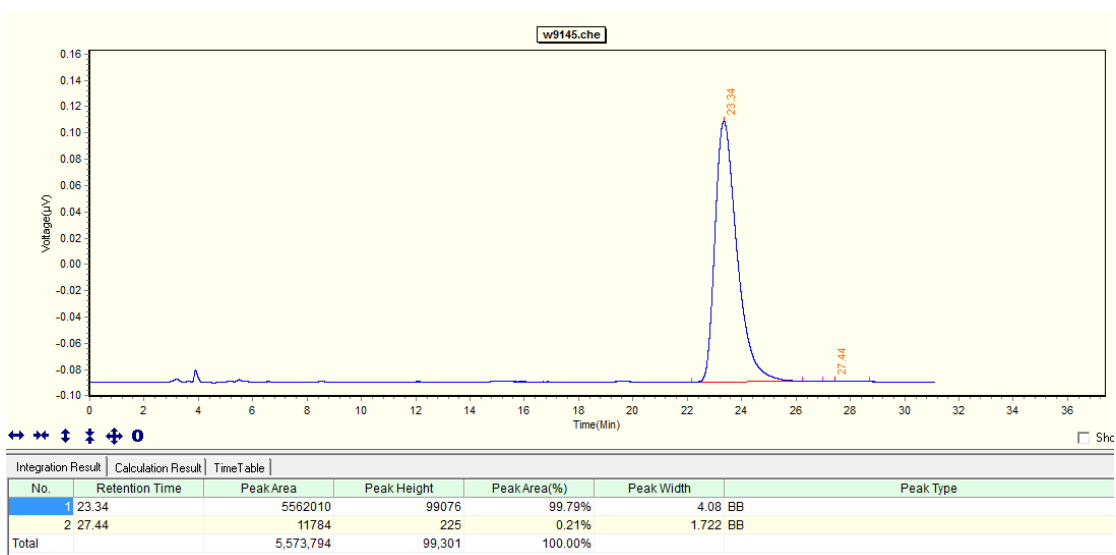



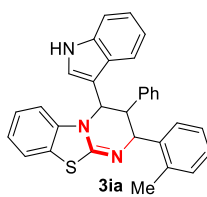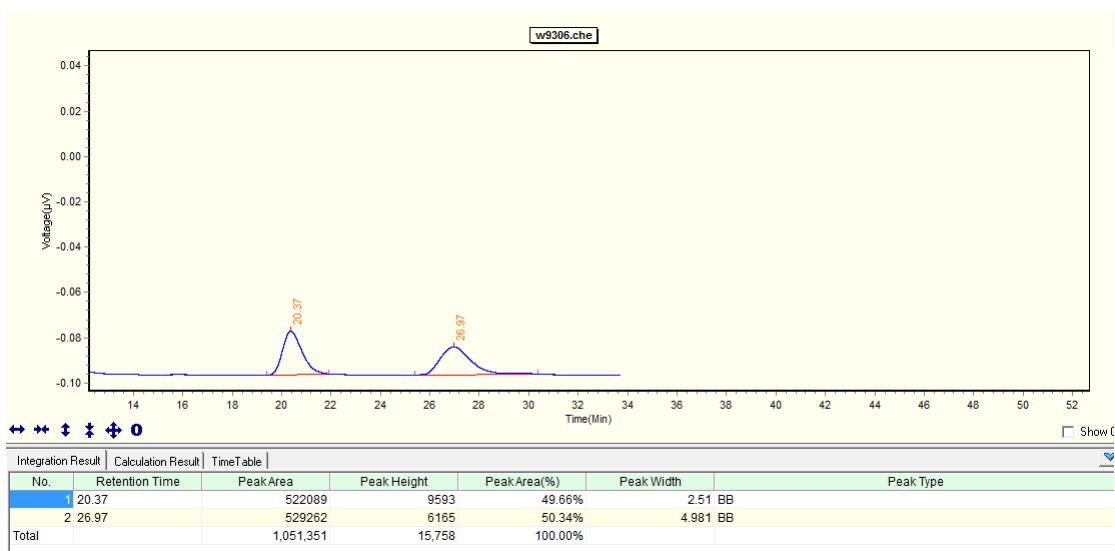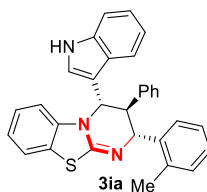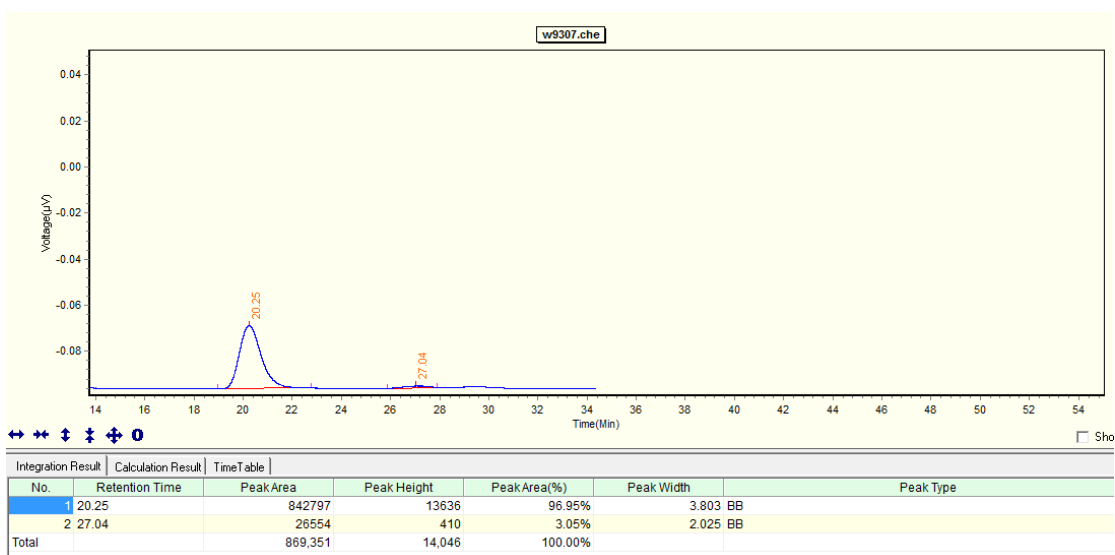

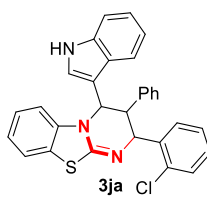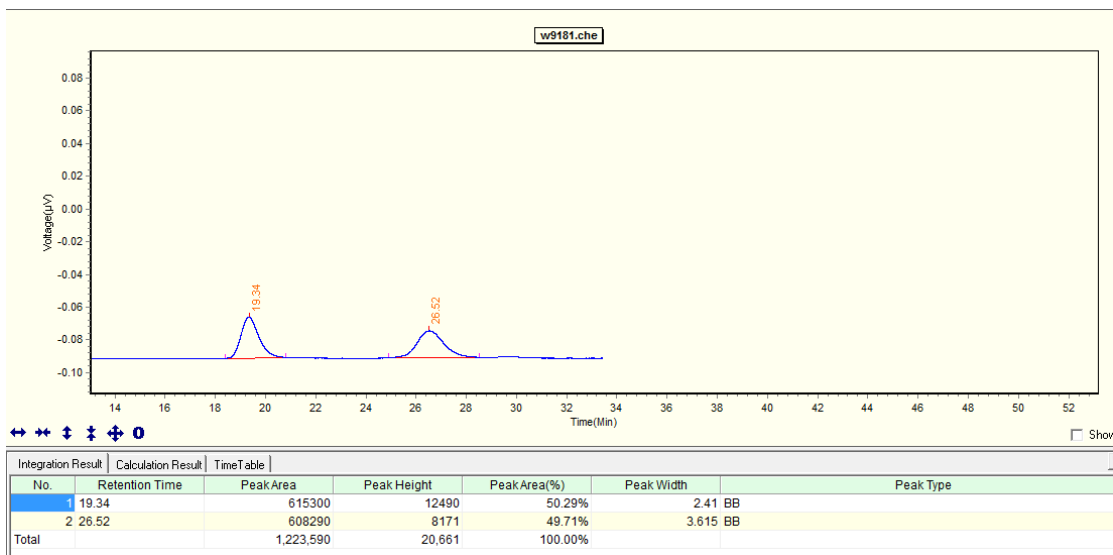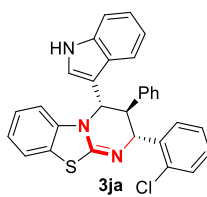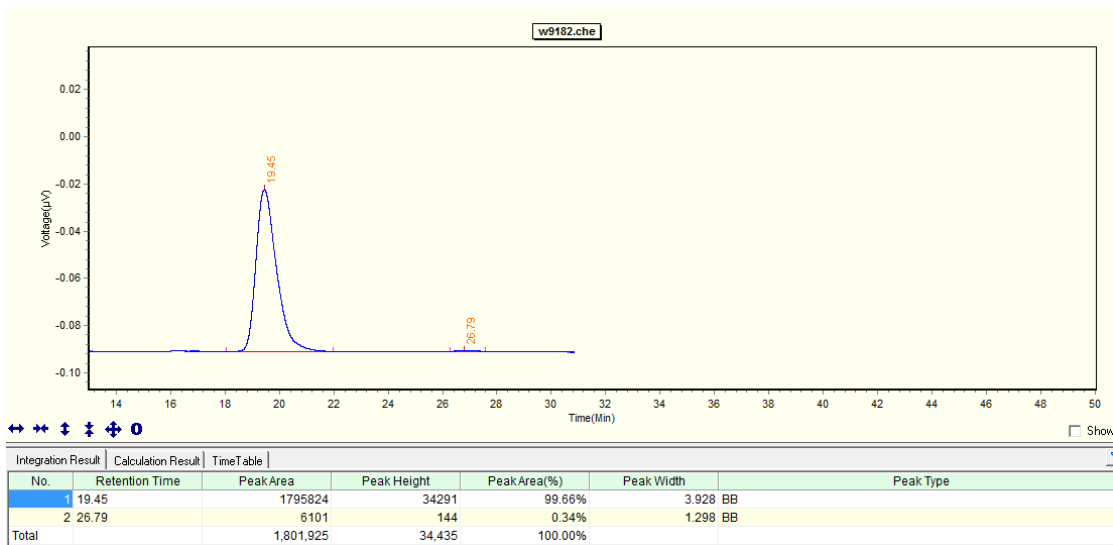

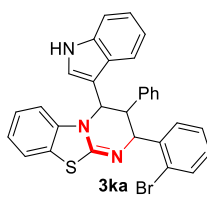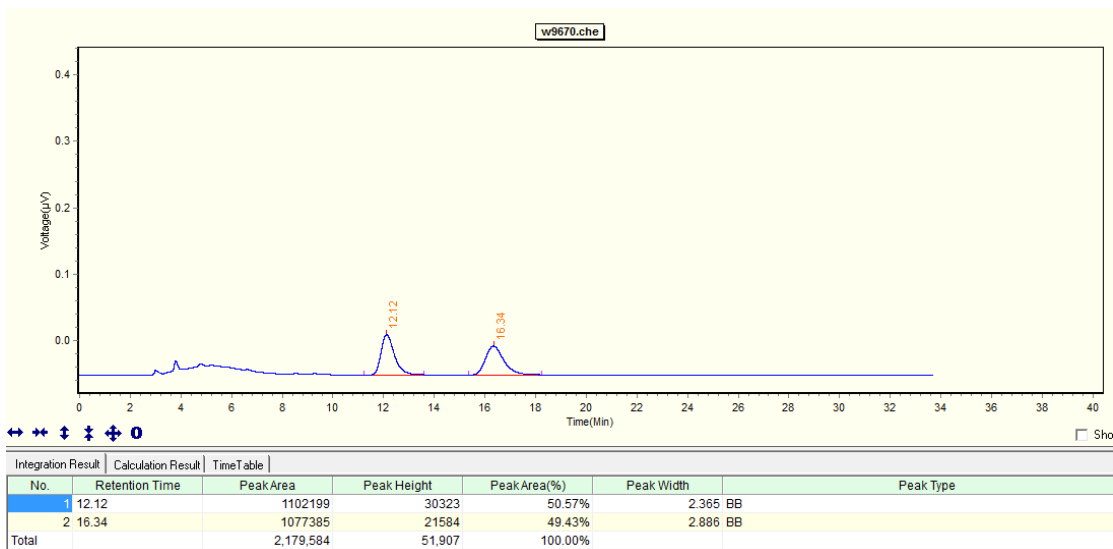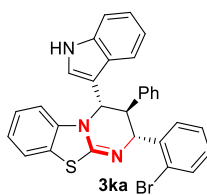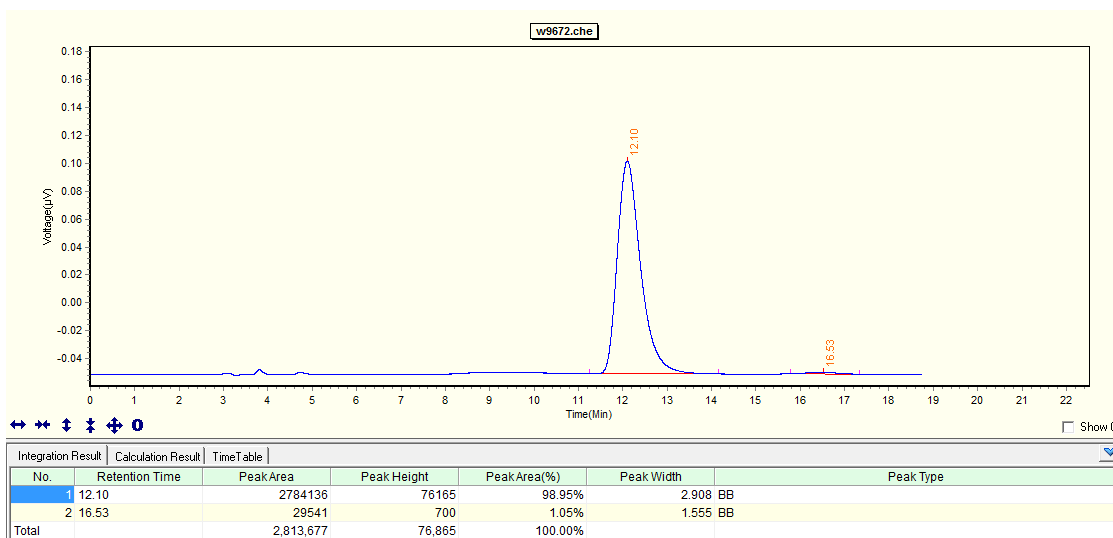

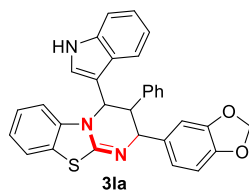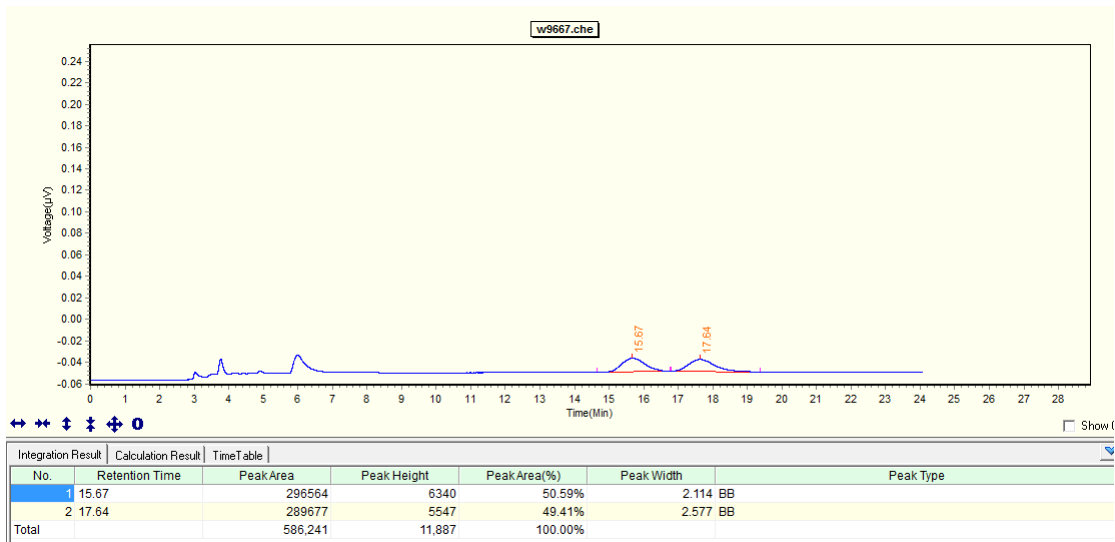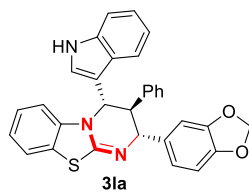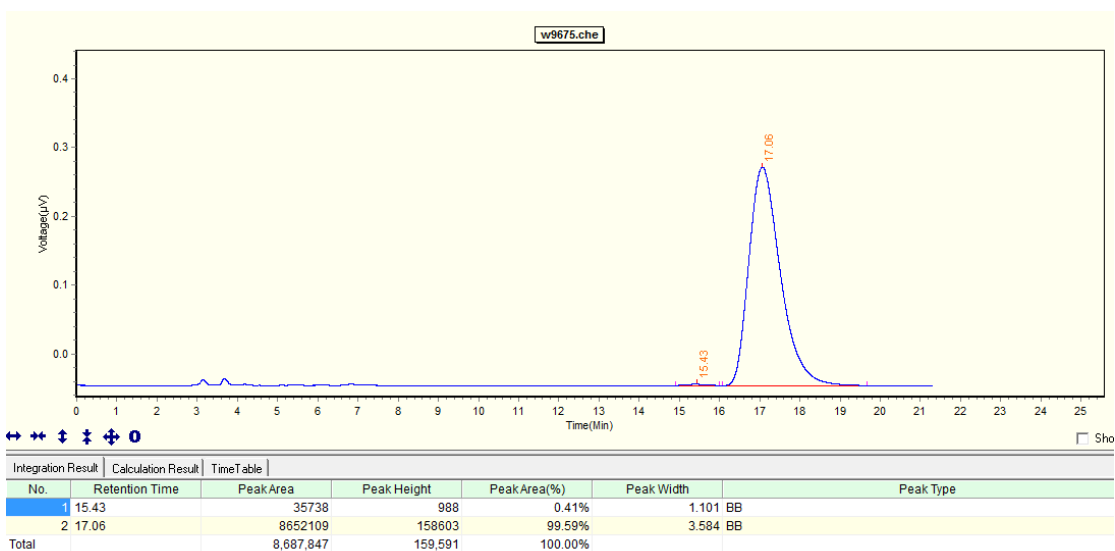

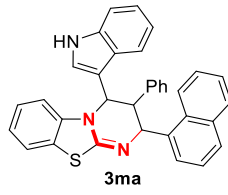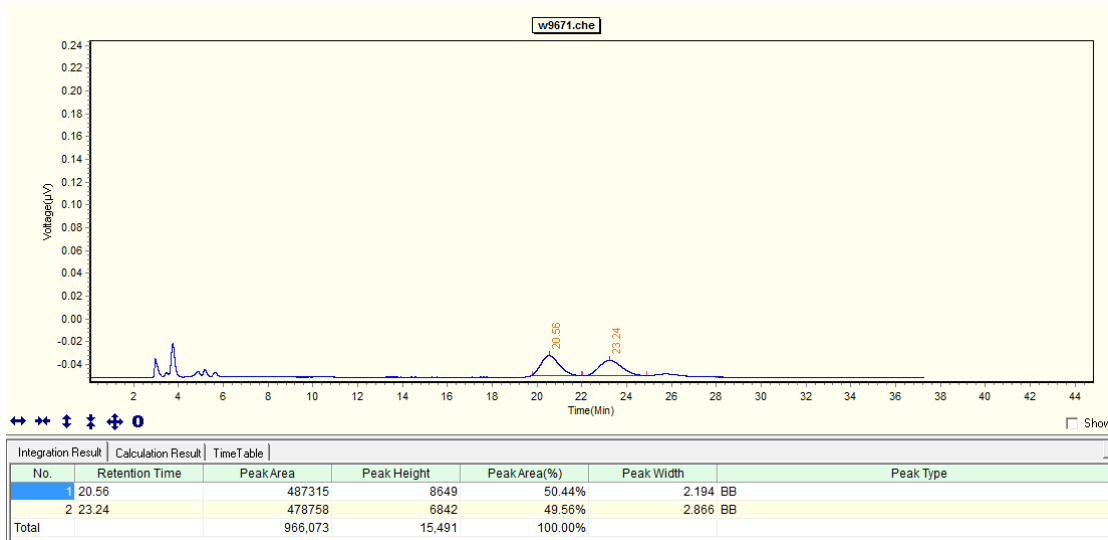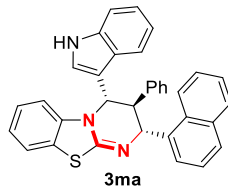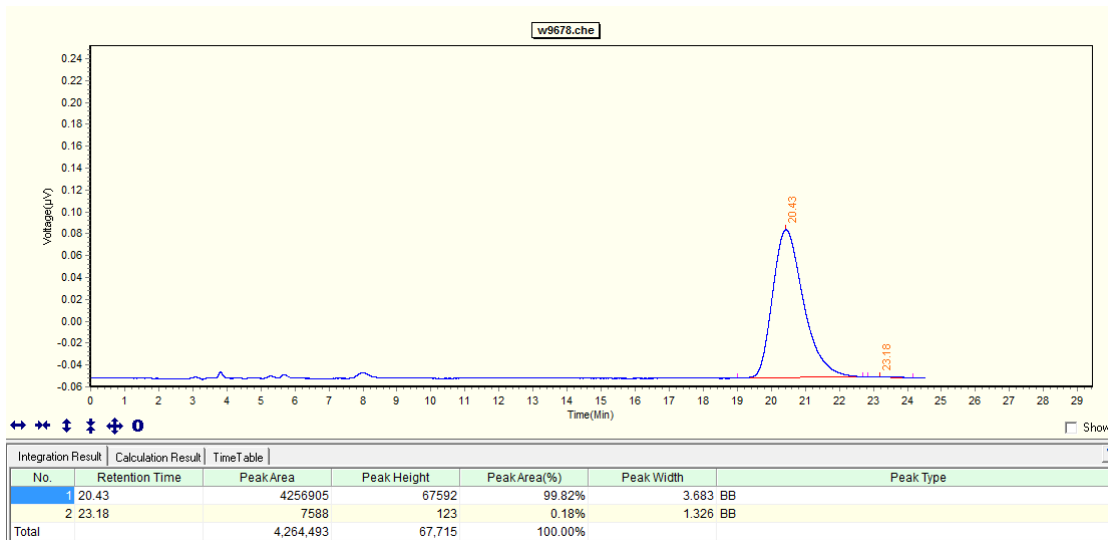

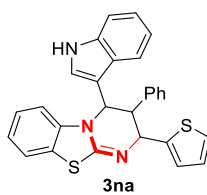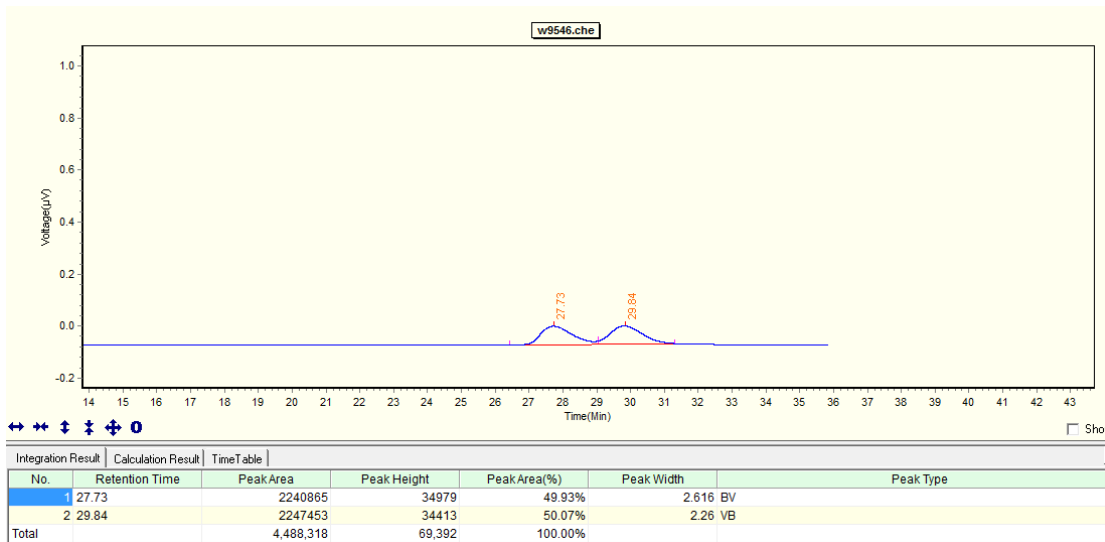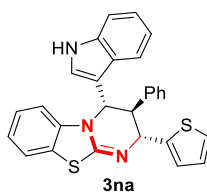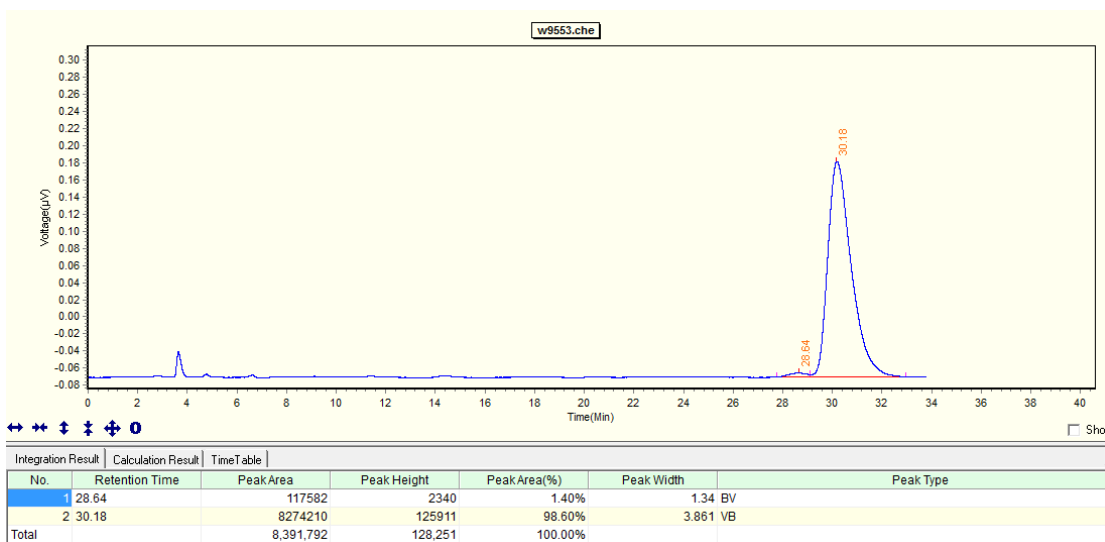

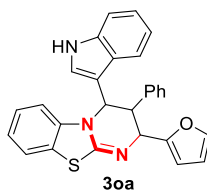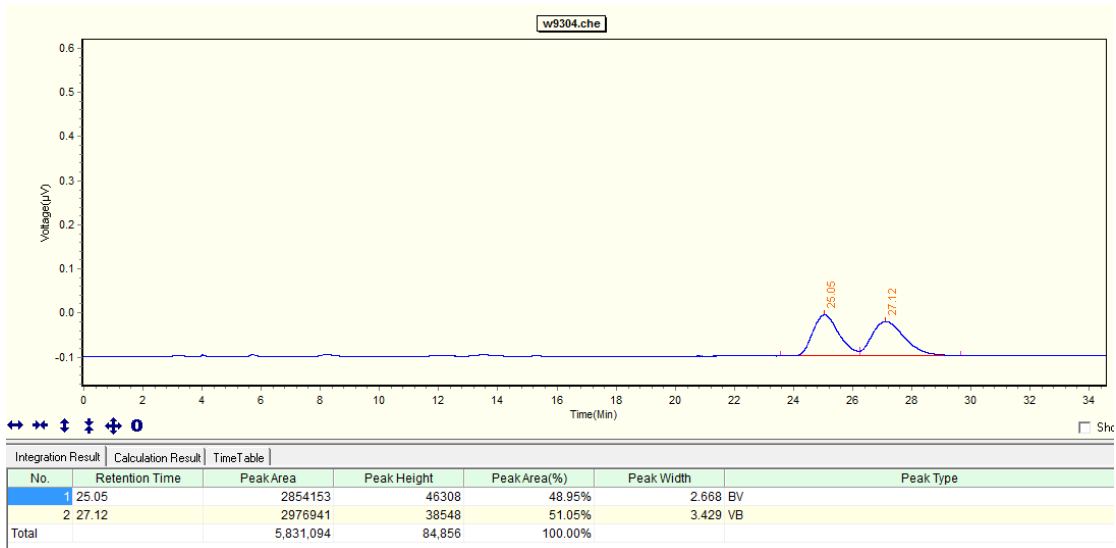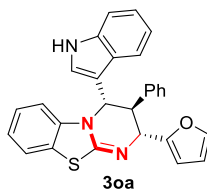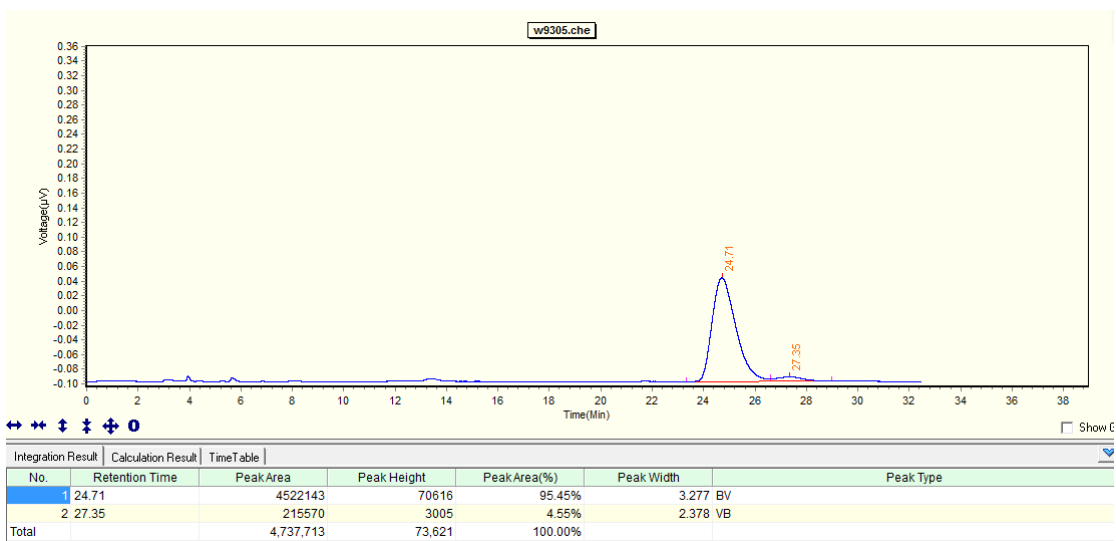

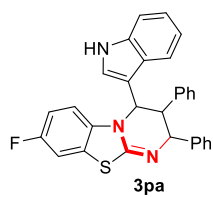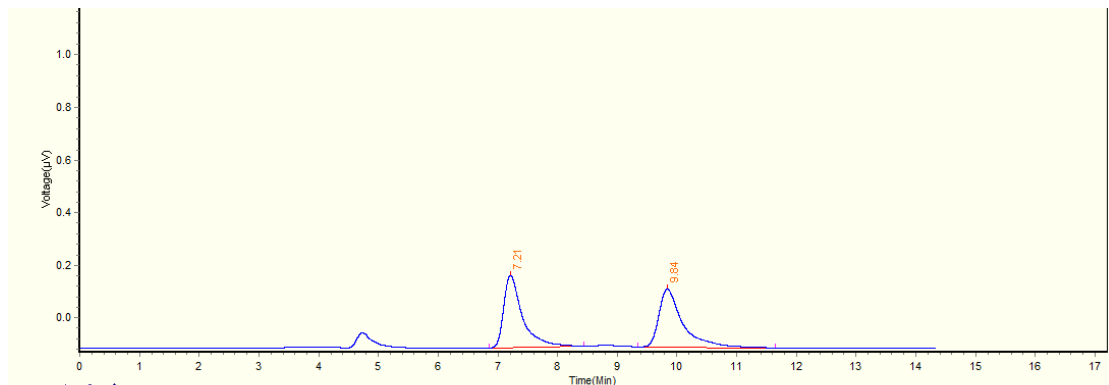

| No.   | Retention Time | Peak Area | Peak Height | Peak Area(%) | Peak Width | Peak Type |
|-------|----------------|-----------|-------------|--------------|------------|-----------|
| 1     | 7.21           | 3012975   | 137409      | 49.75%       | 1.584      | BB        |
| 2     | 9.84           | 3042911   | 109792      | 50.25%       | 2.291      | BB        |
| Total |                | 6,055,886 | 247,201     | 100.00%      |            |           |

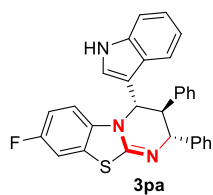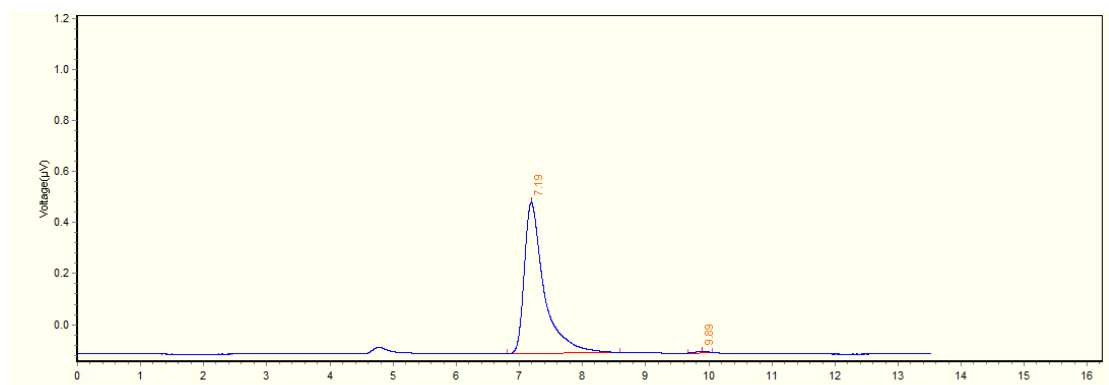

| No.   | Retention Time | Peak Area | Peak Height | Peak Area(%) | Peak Width | Peak Type |
|-------|----------------|-----------|-------------|--------------|------------|-----------|
| 1     | 7.19           | 6454722   | 296388      | 99.55%       | 1.786      | BB        |
| 2     | 9.89           | 29342     | 2146        | 0.45%        | 0.386      | BB        |
| Total |                | 6,484,064 | 298,534     | 100.00%      |            |           |



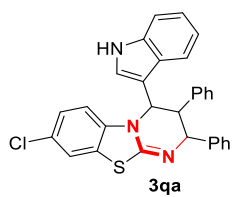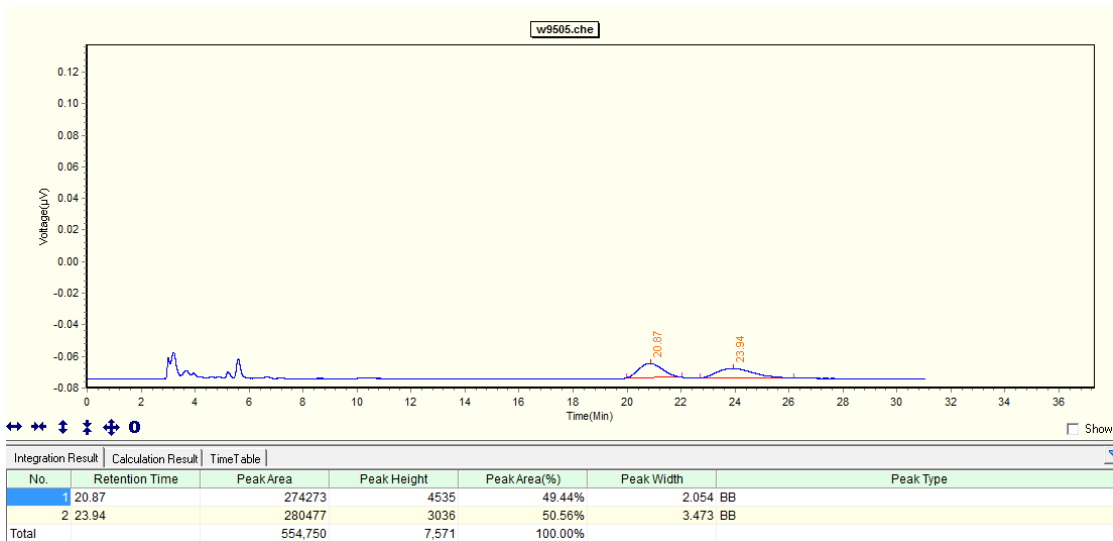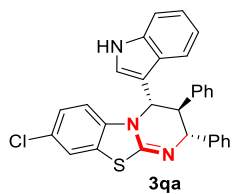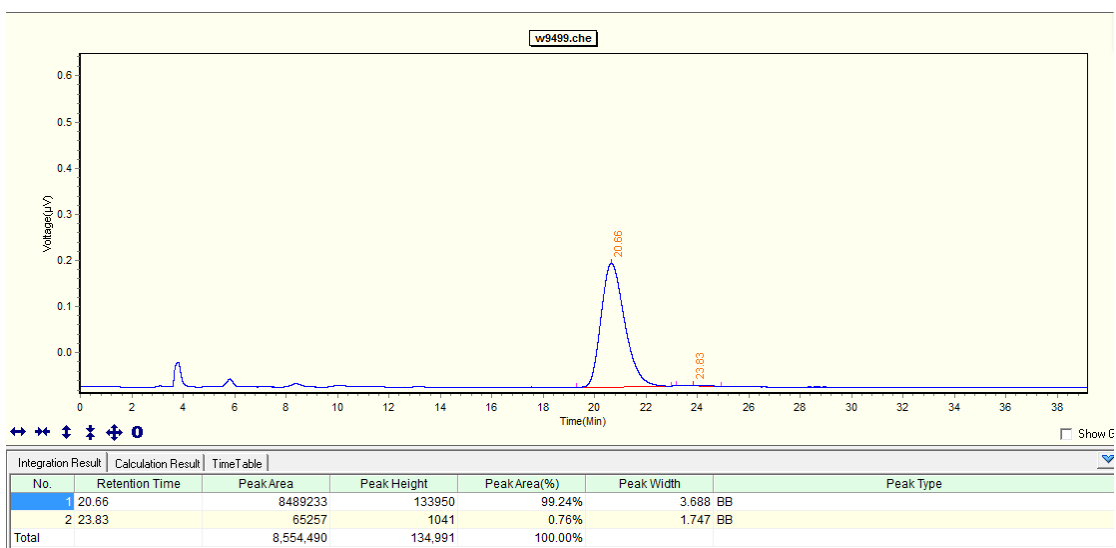

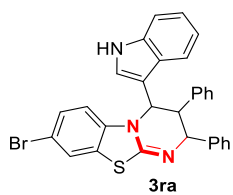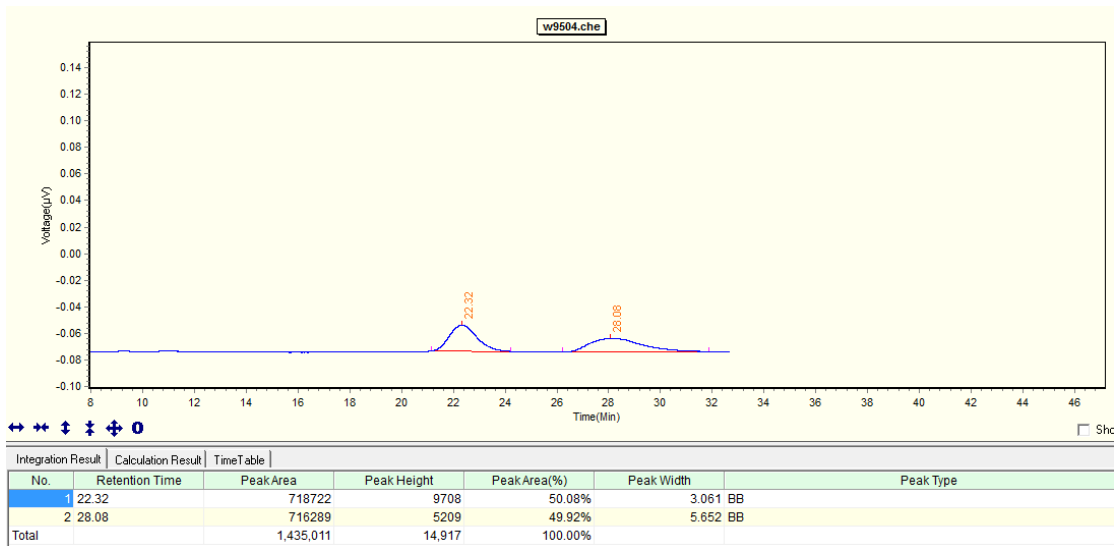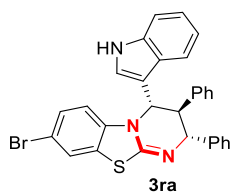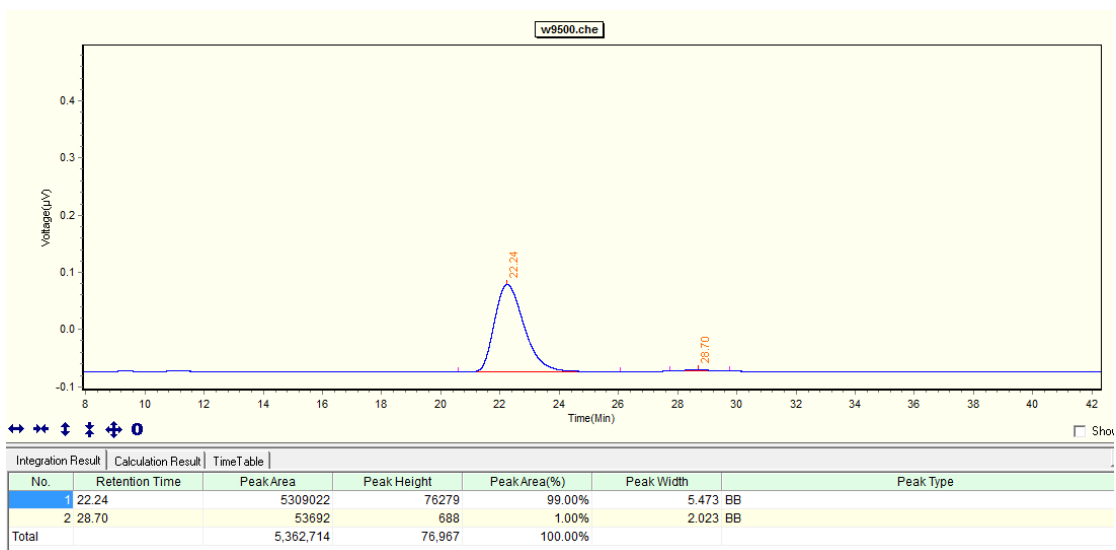

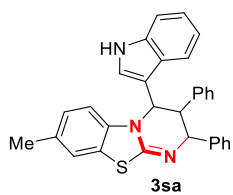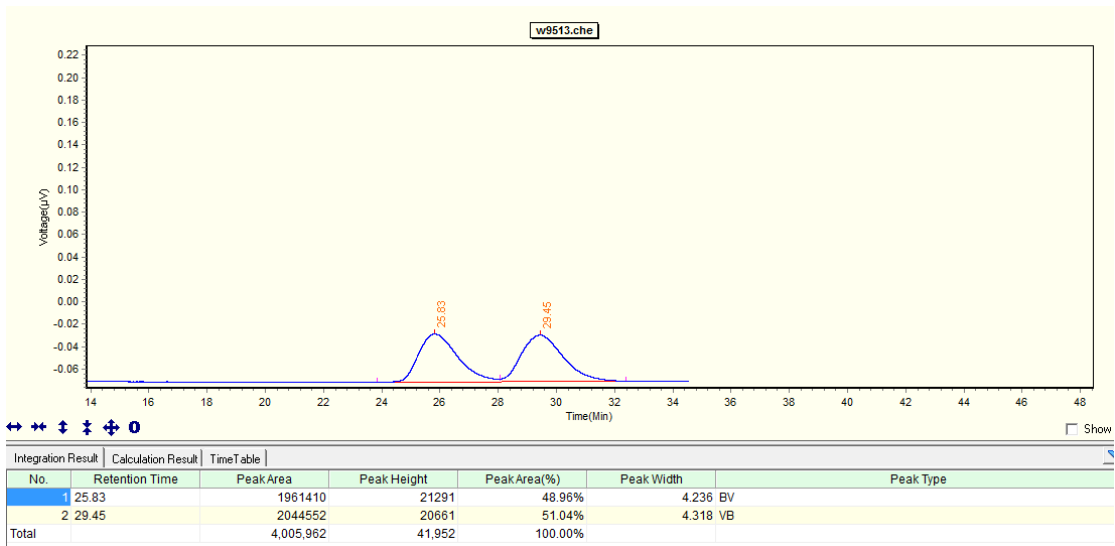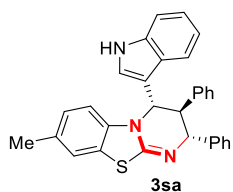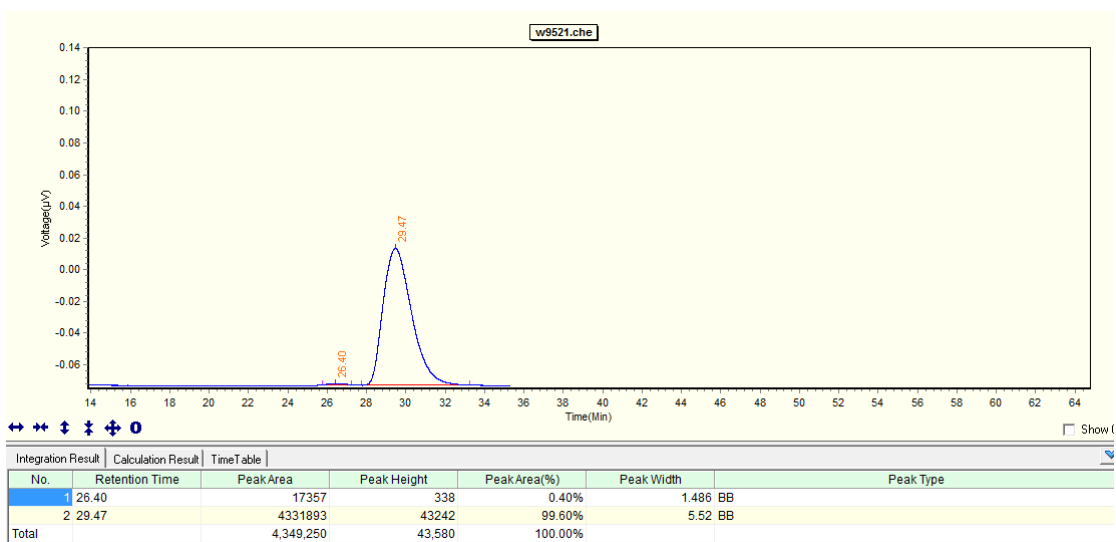

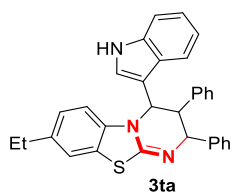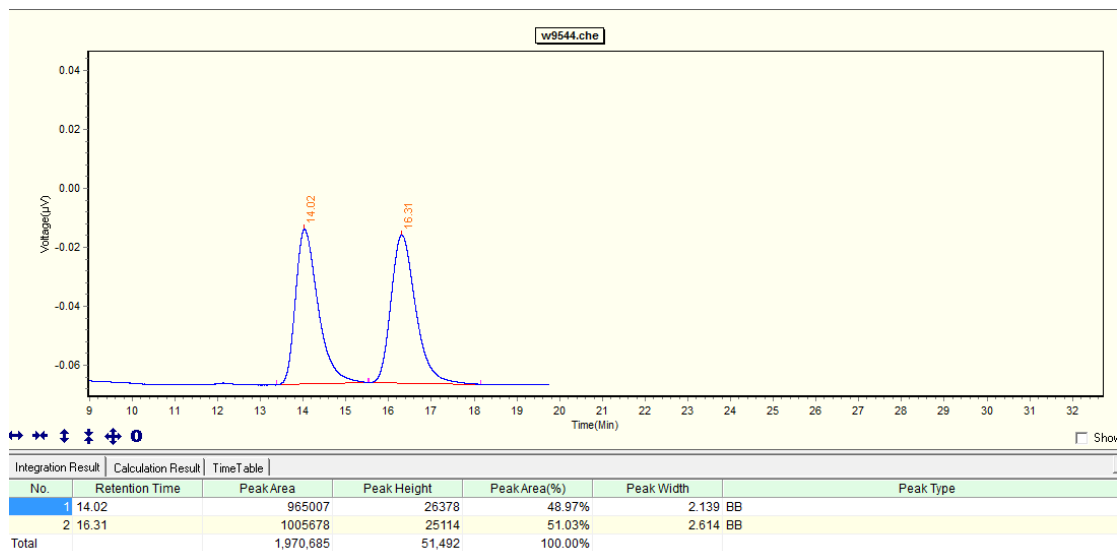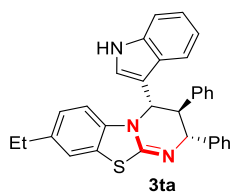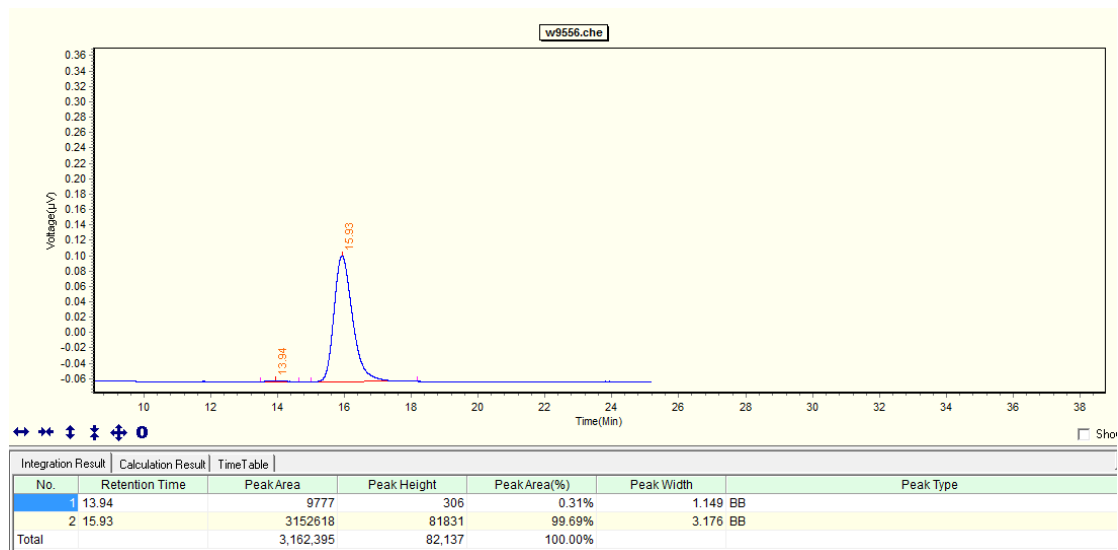

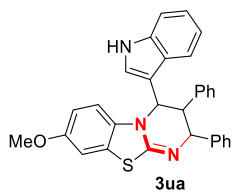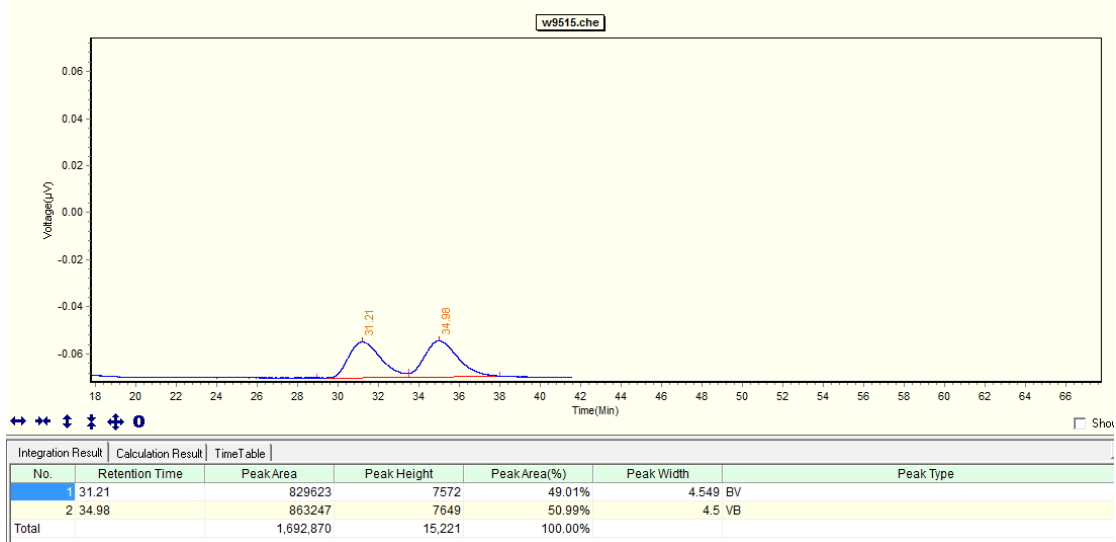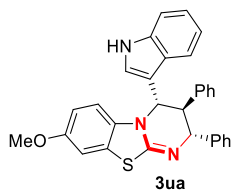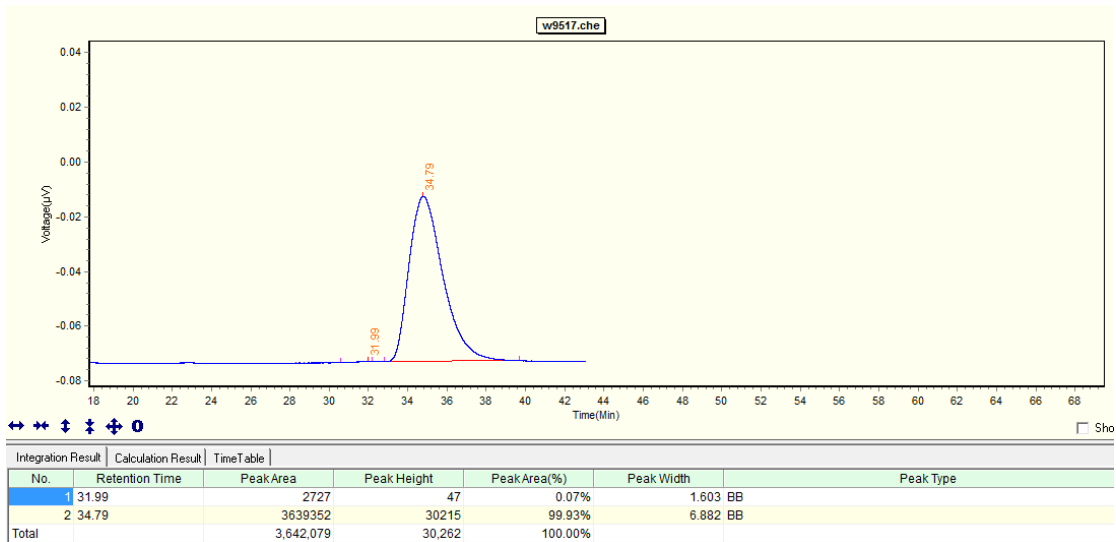

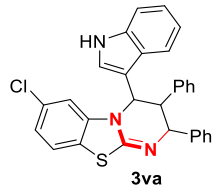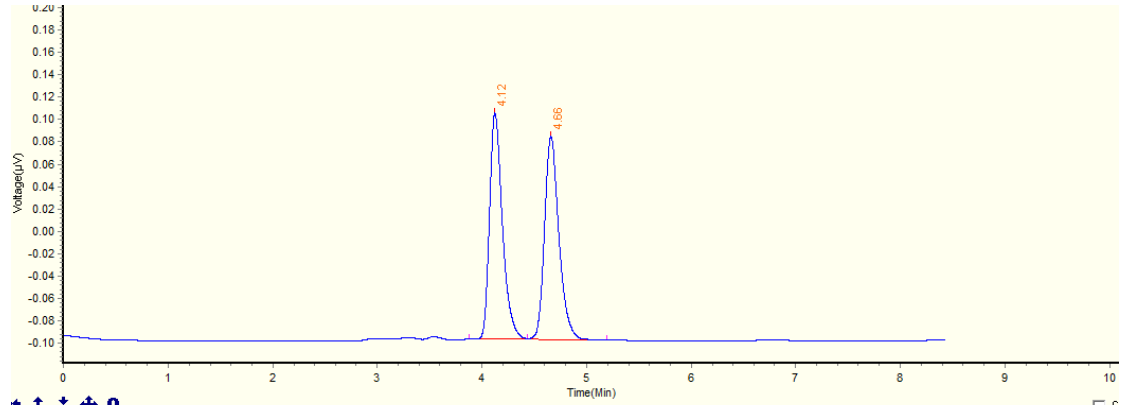

| No. | Retention Time | Peak Area | Peak Height | Peak Area(%) | Peak Width | Peak Type |
|-----|----------------|-----------|-------------|--------------|------------|-----------|
| 1   | 4.12           | 864694    | 100986      | 49.85%       | 0.557 BV   |           |
| 2   | 4.66           | 869927    | 90774       | 50.15%       | 0.758 VB   |           |

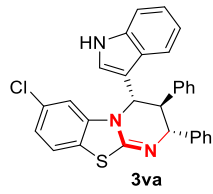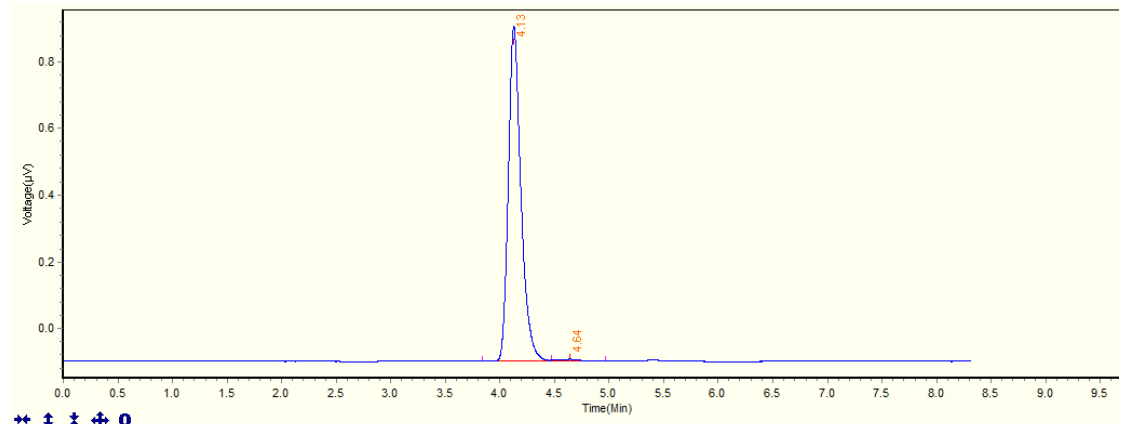

| No. | Retention Time | Peak Area | Peak Height | Peak Area(%) | Peak Width | Peak Type |
|-----|----------------|-----------|-------------|--------------|------------|-----------|
| 1   | 4.13           | 4022330   | 500626      | 99.08%       | 0.633 BV   |           |
| 2   | 4.64           | 37330     | 2897        | 0.92%        | 0.494 VB   |           |
| nl  |                | 4 059 660 | 503 523     | 100.00%      |            |           |

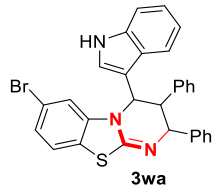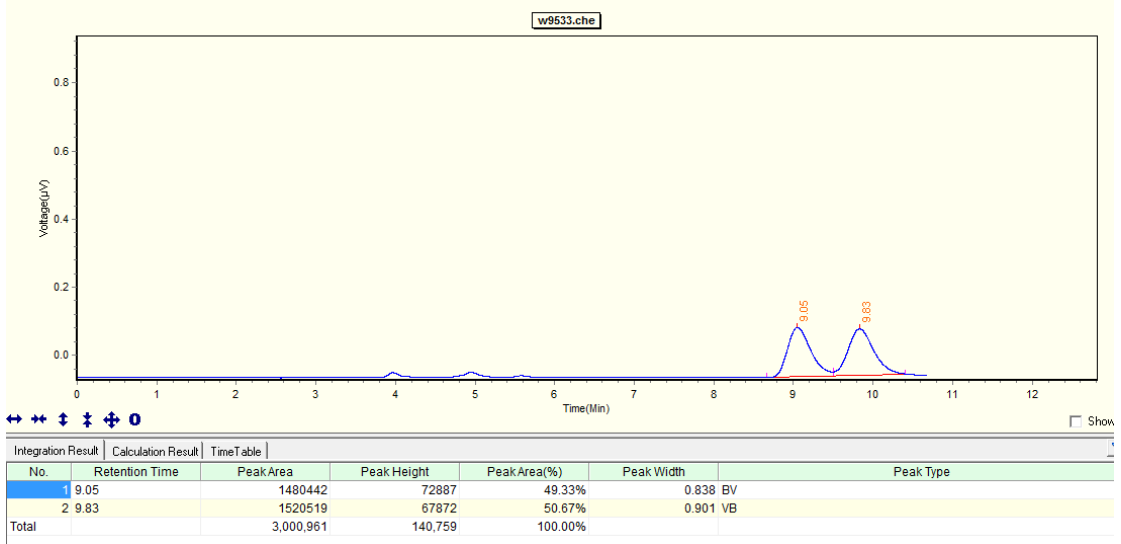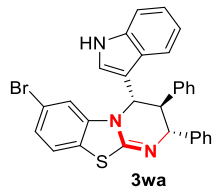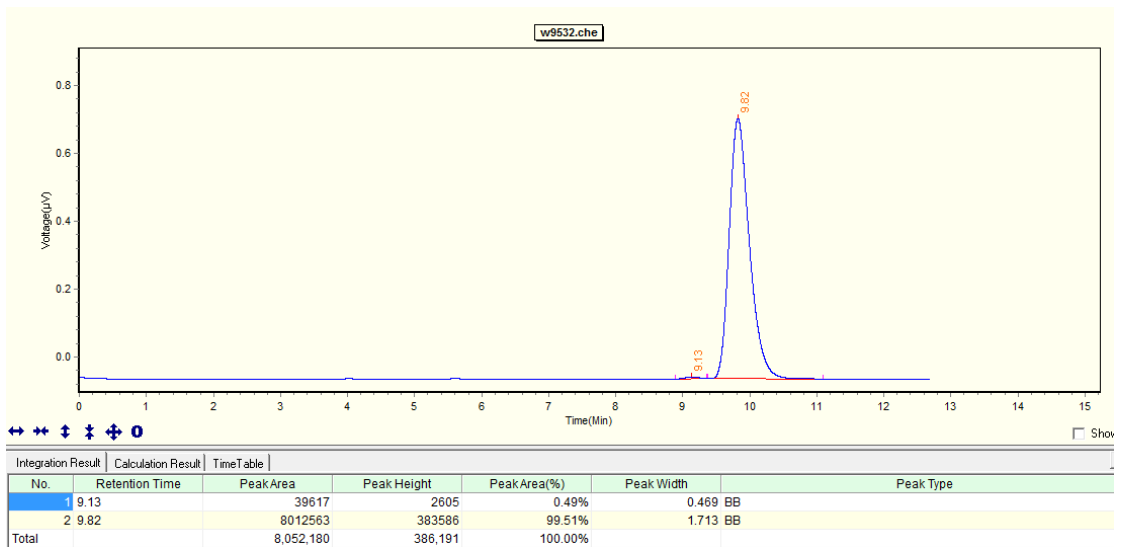

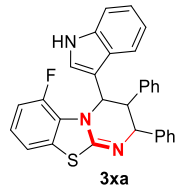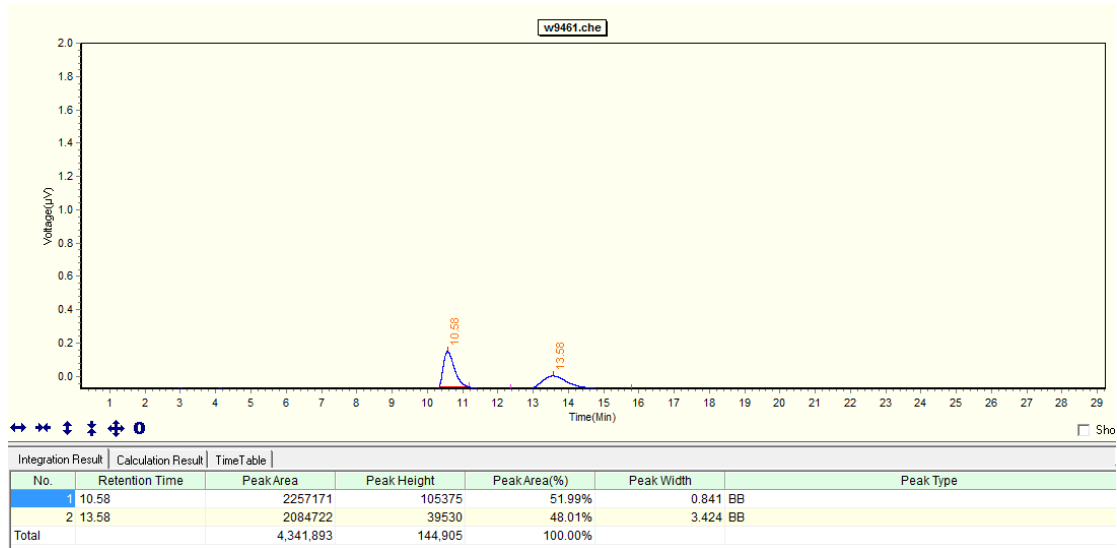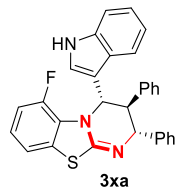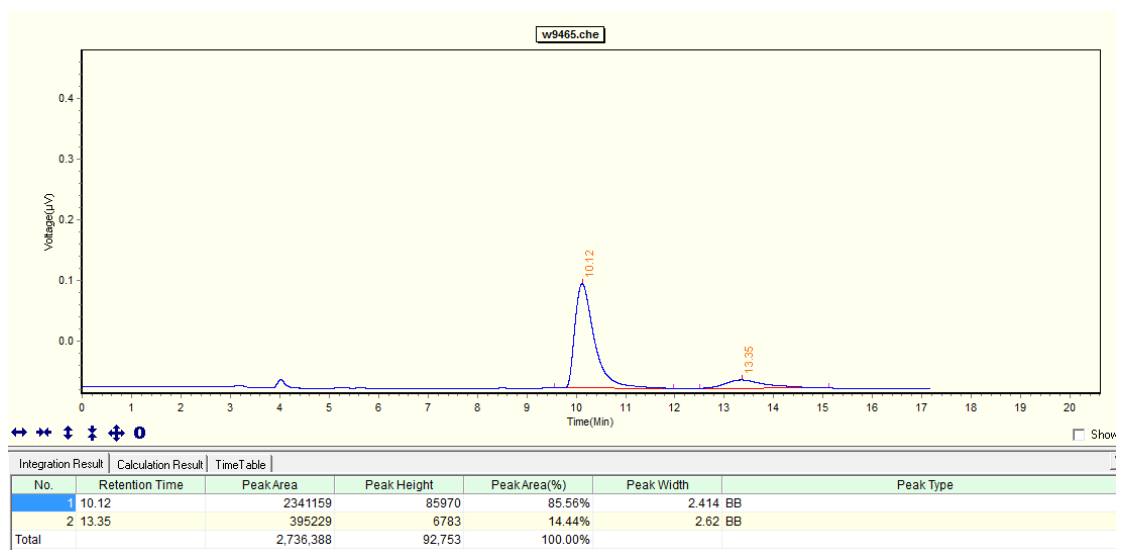



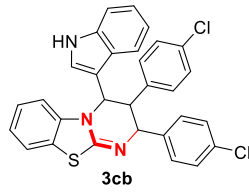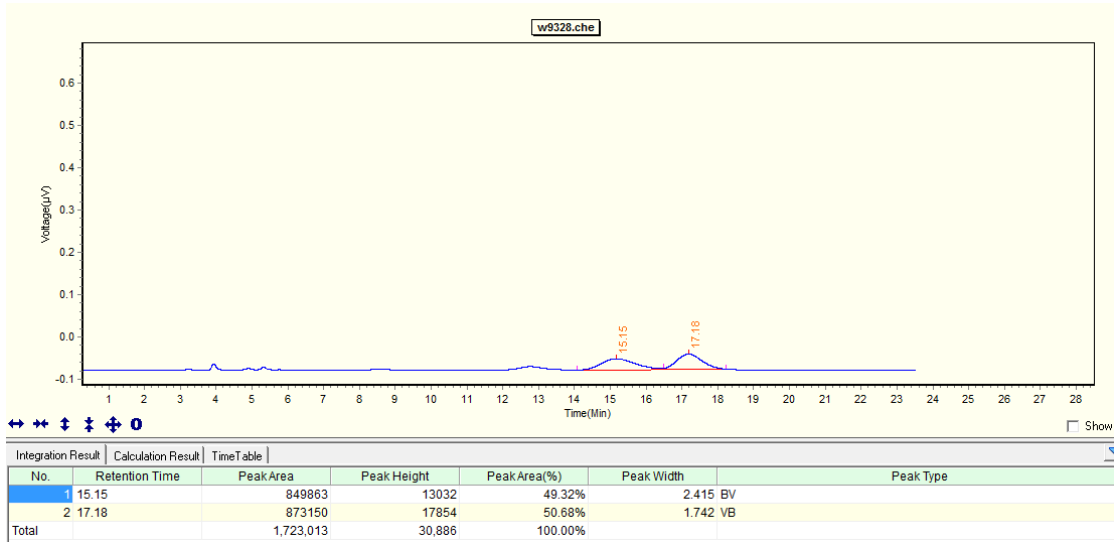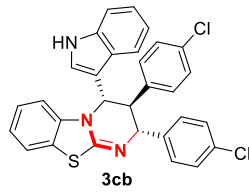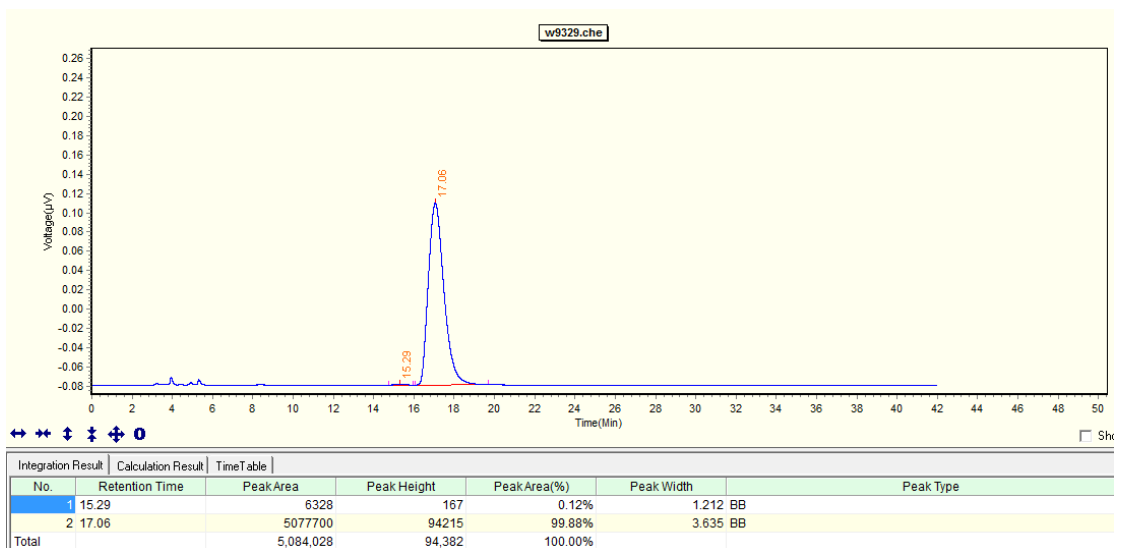

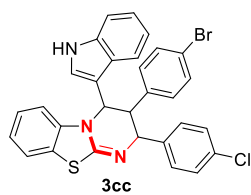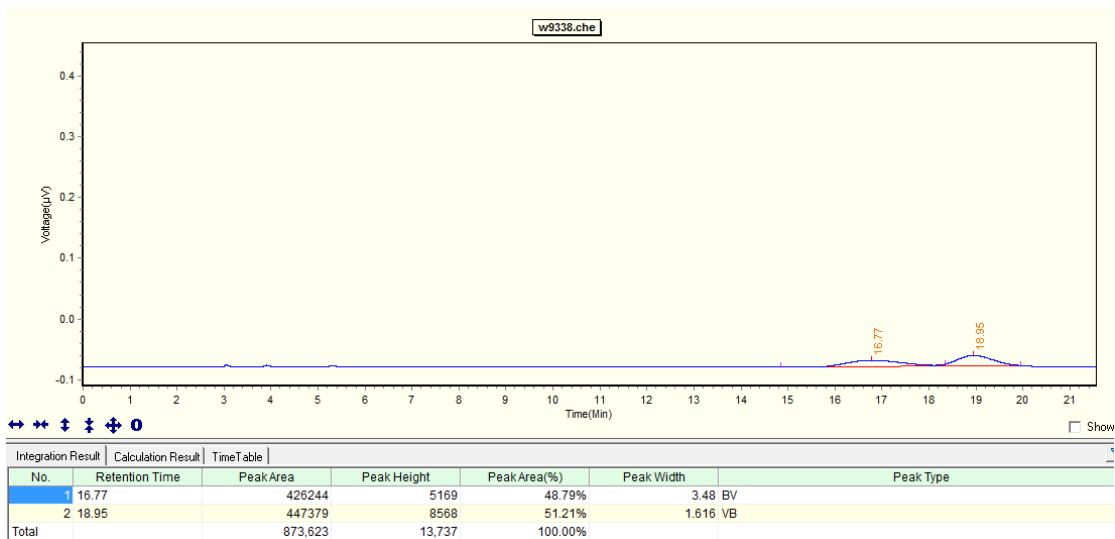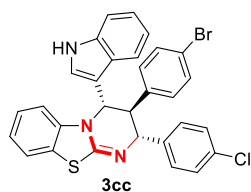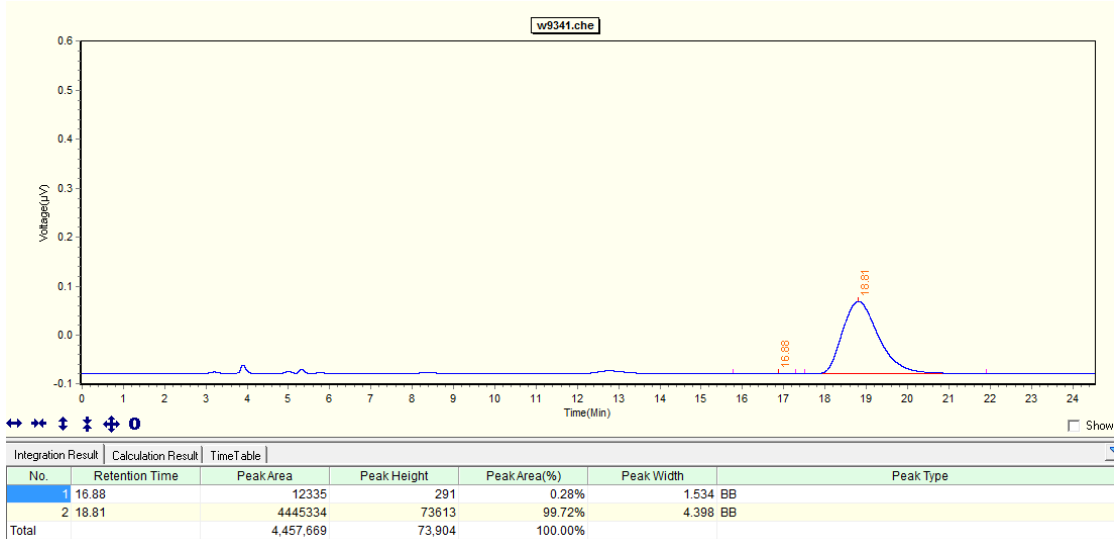

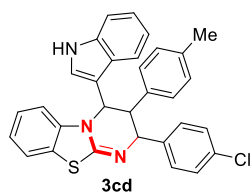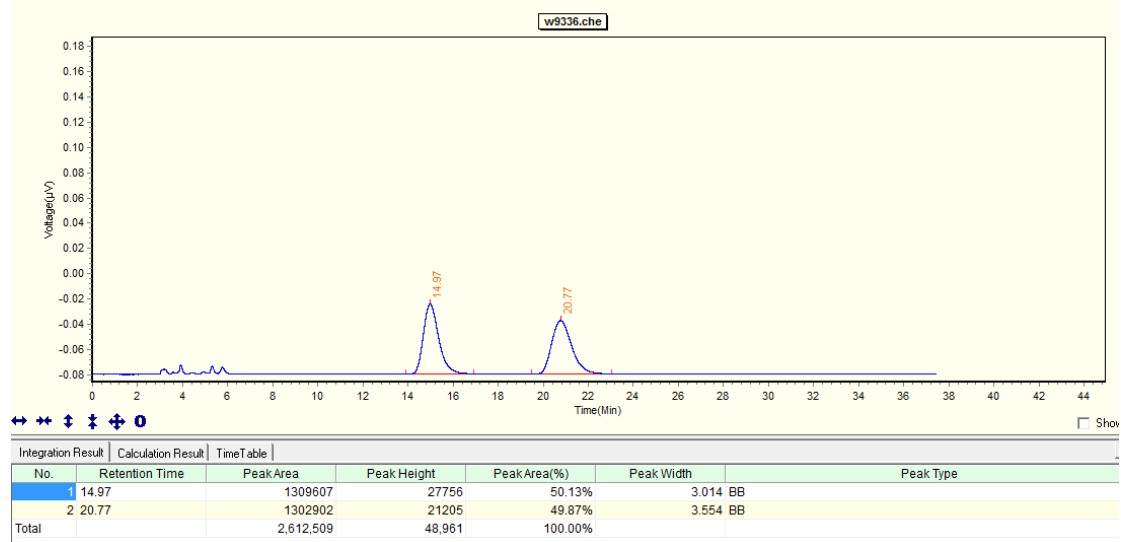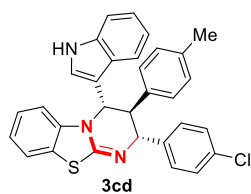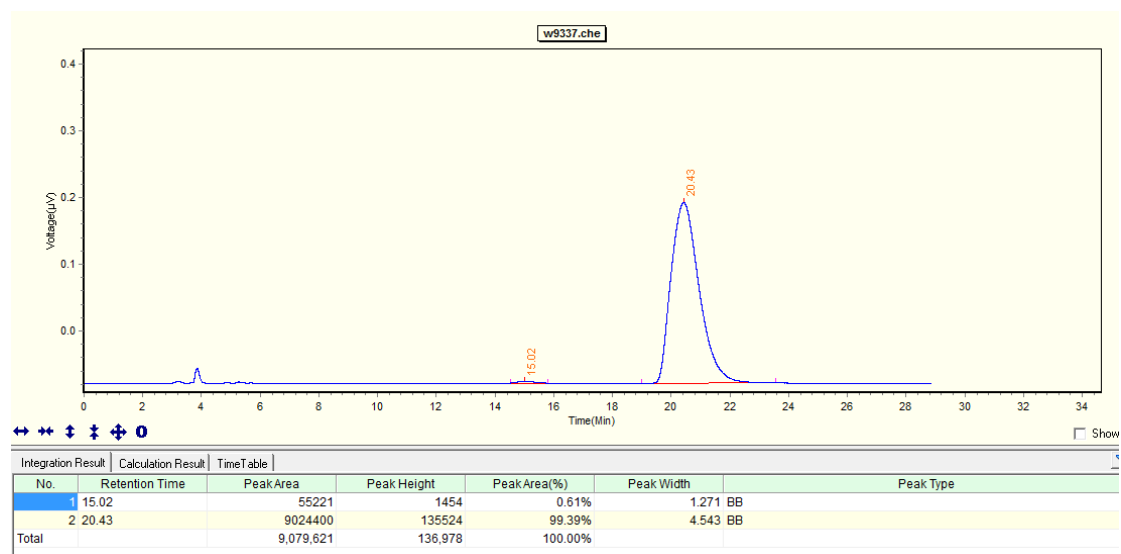

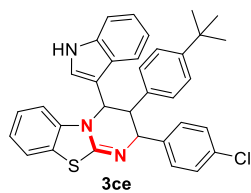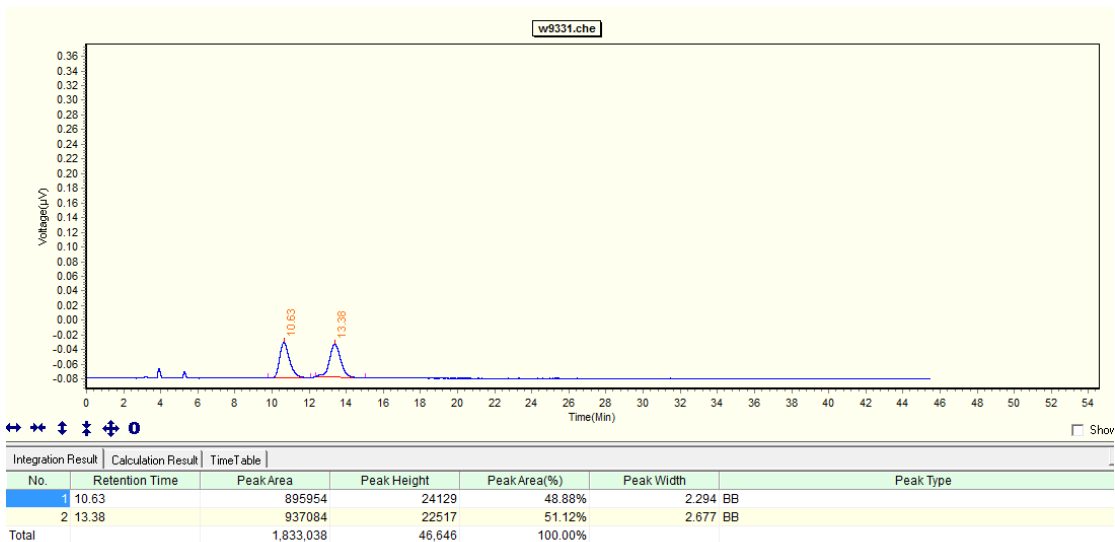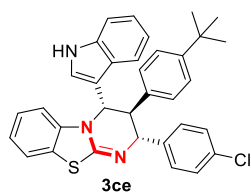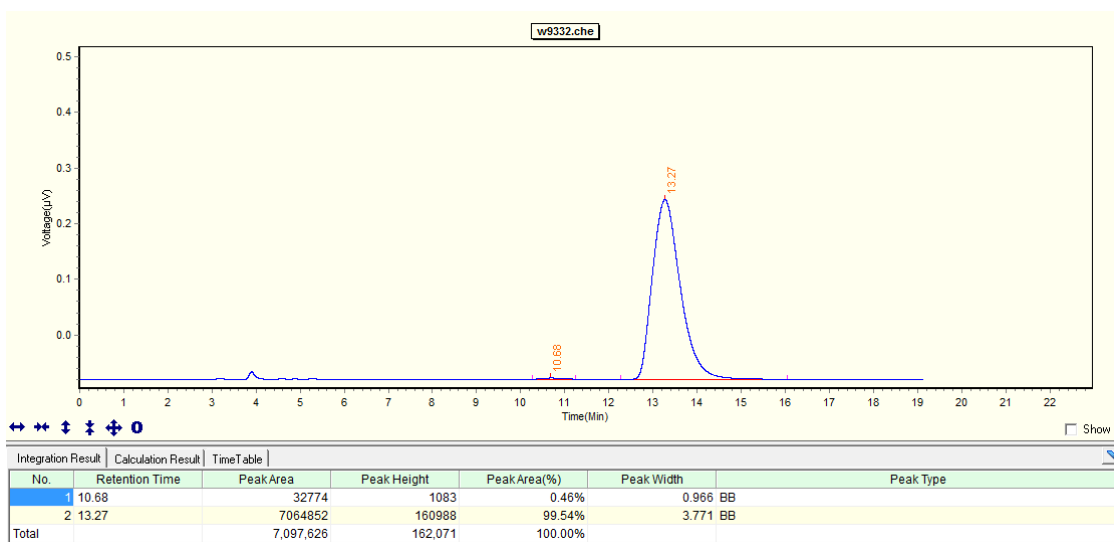

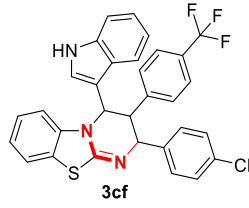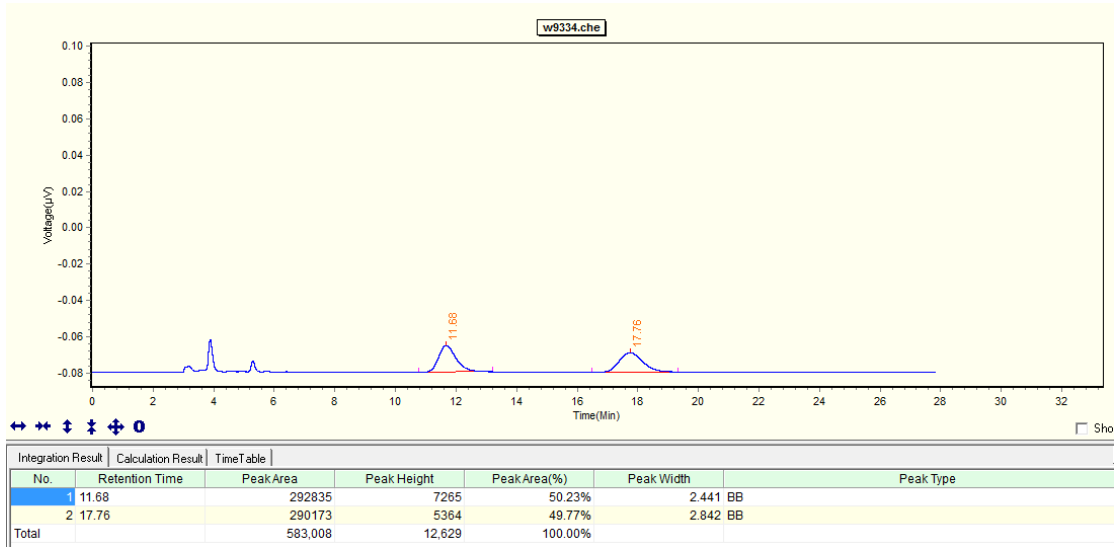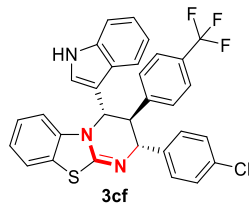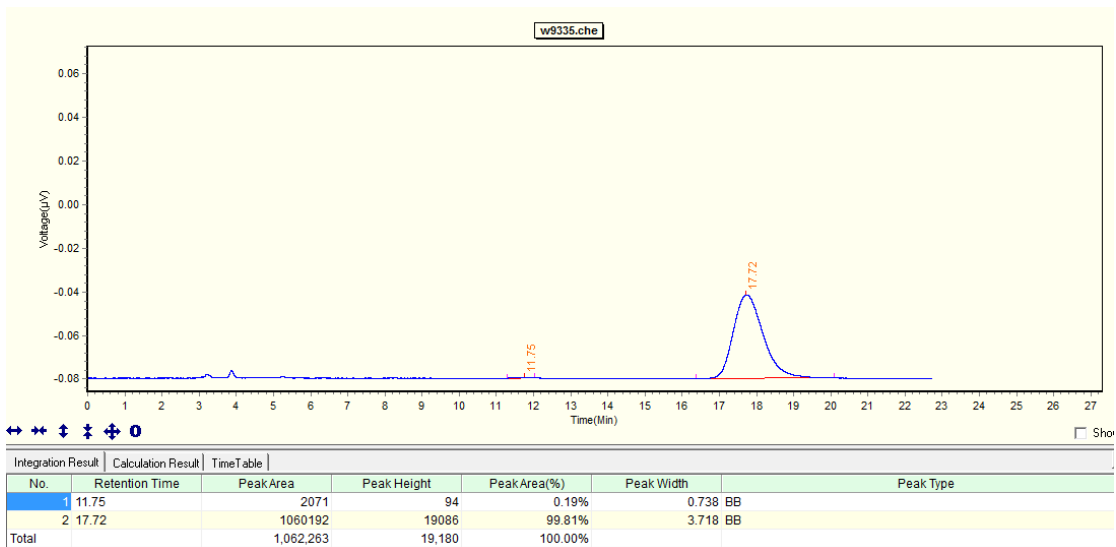



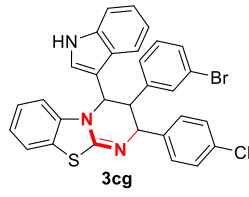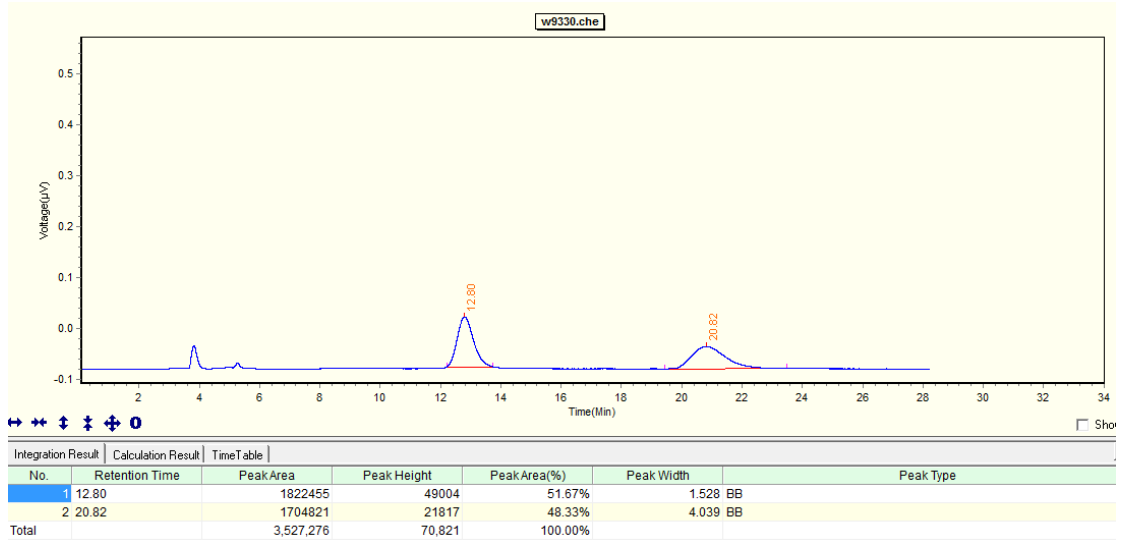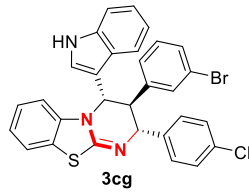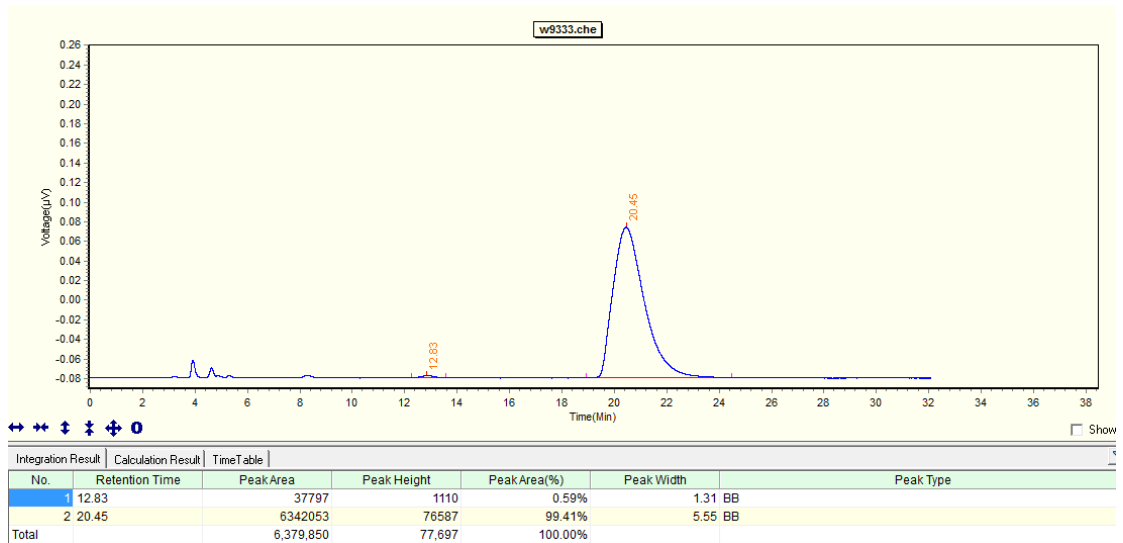

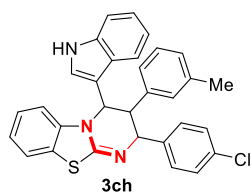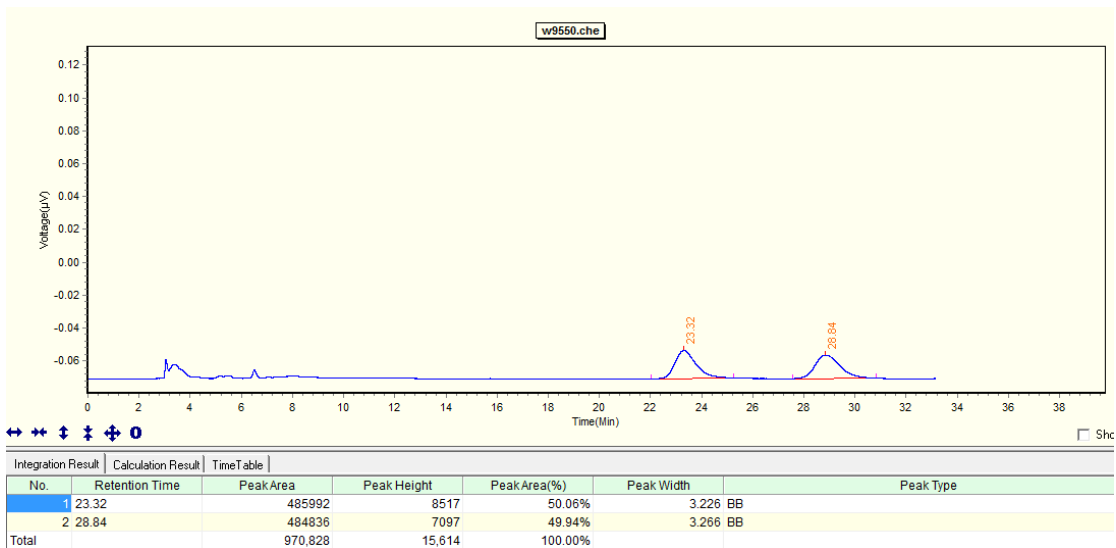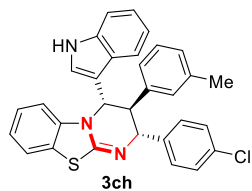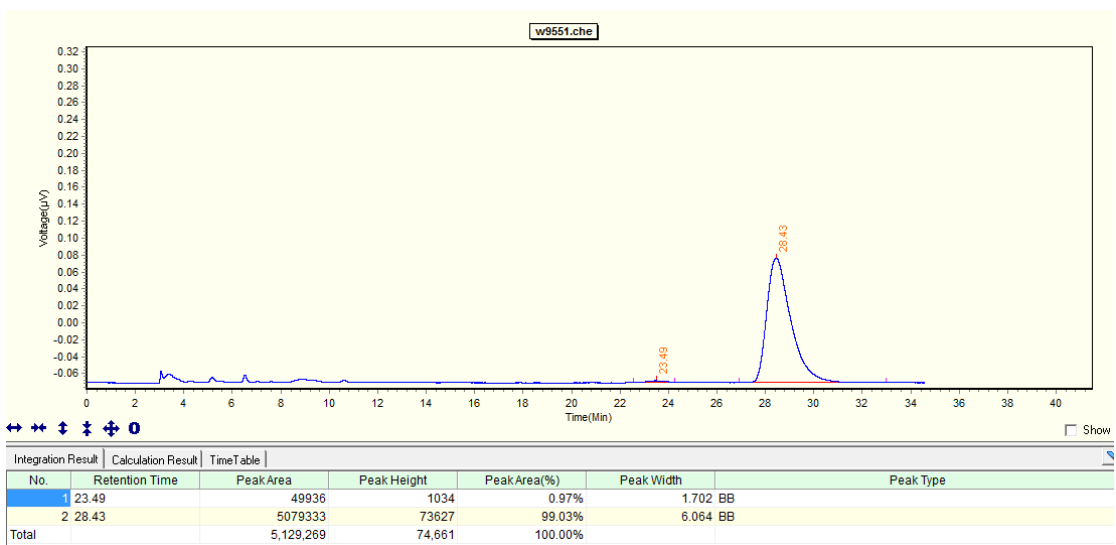



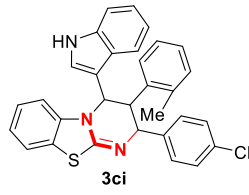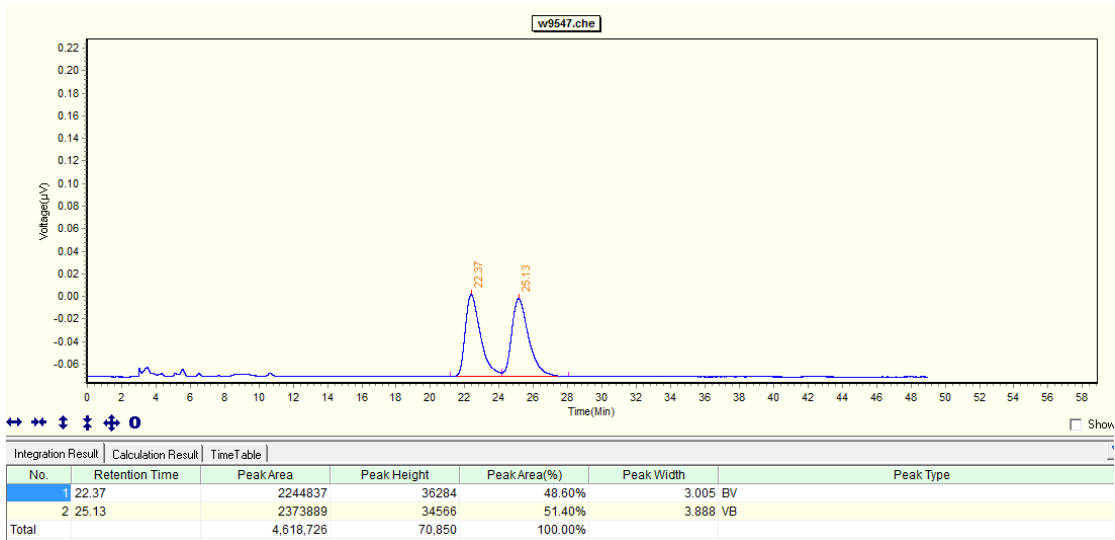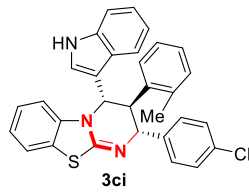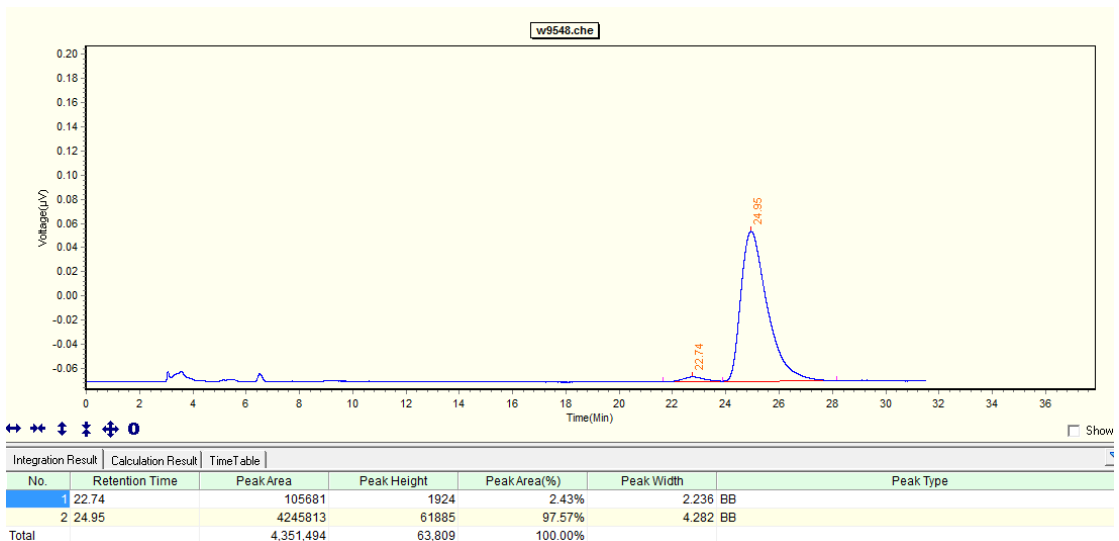

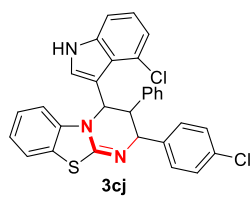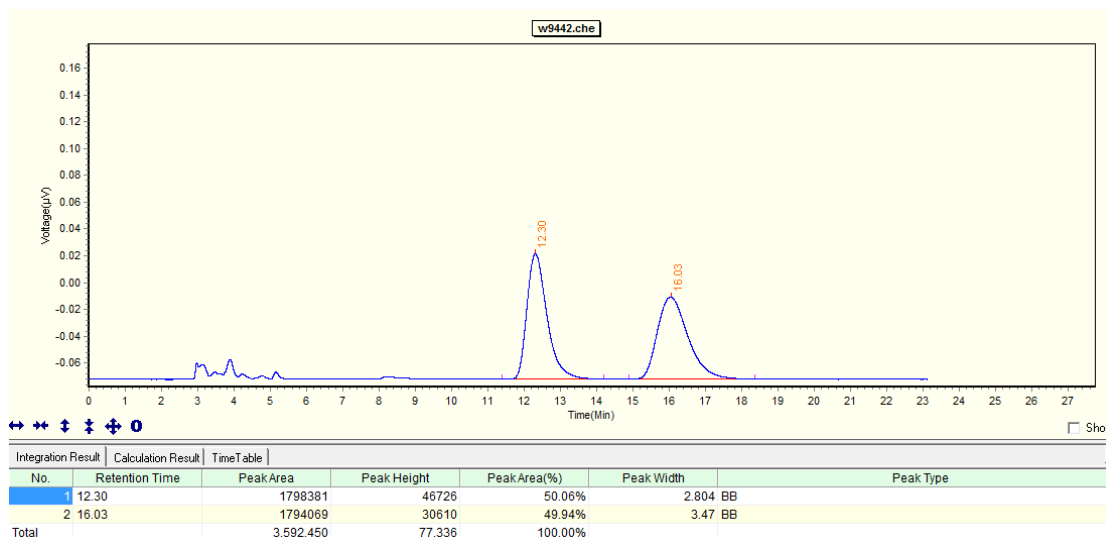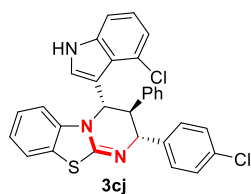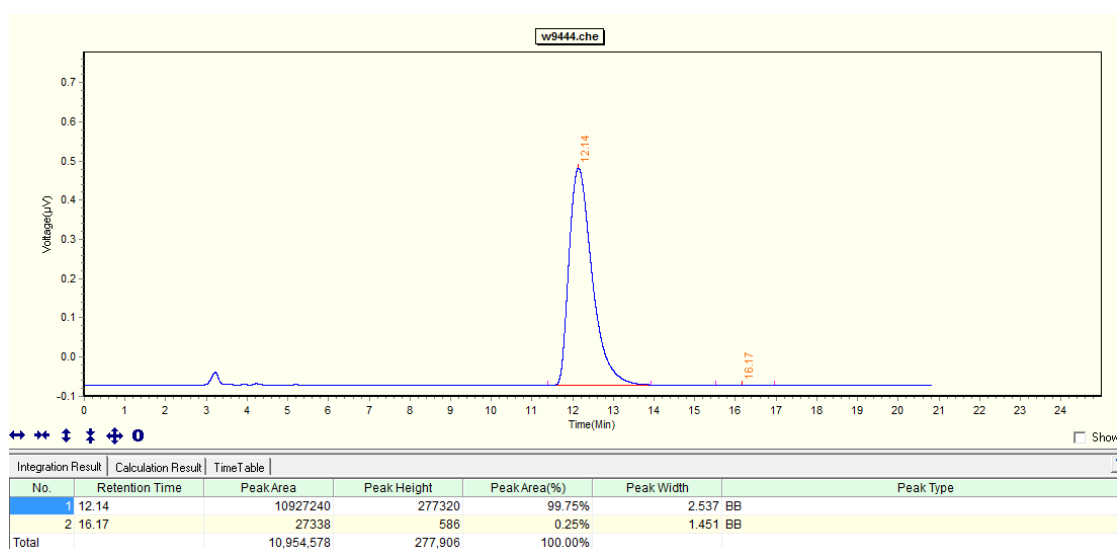

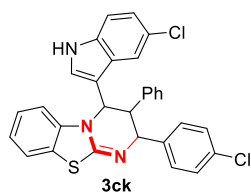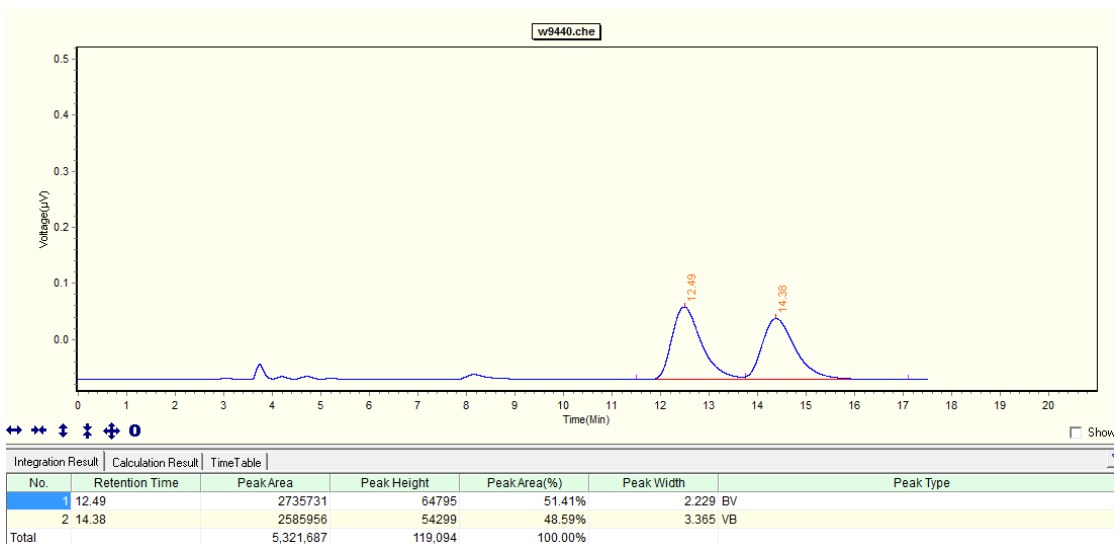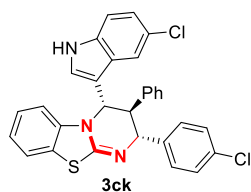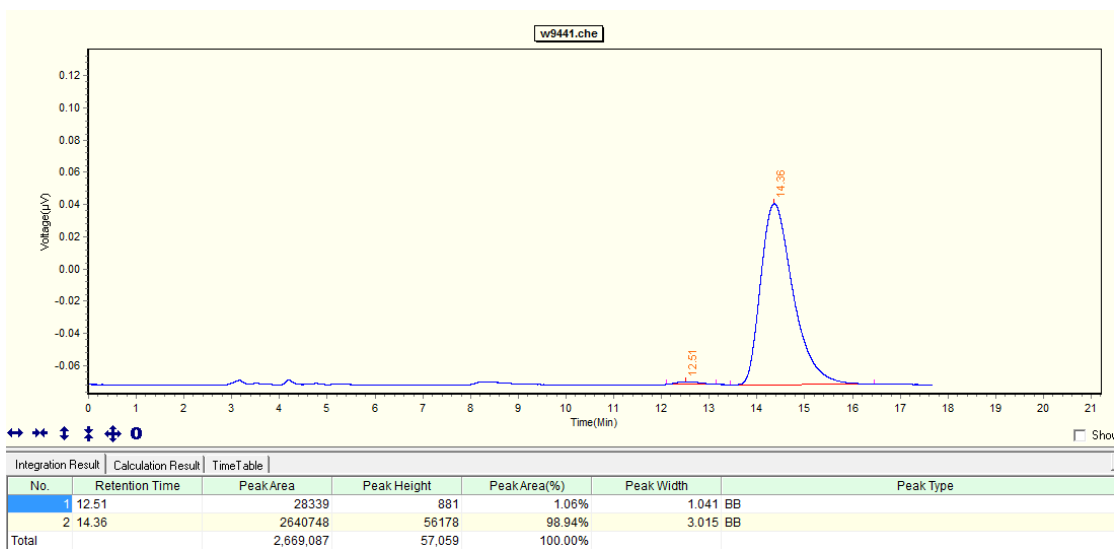

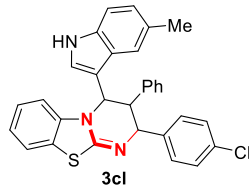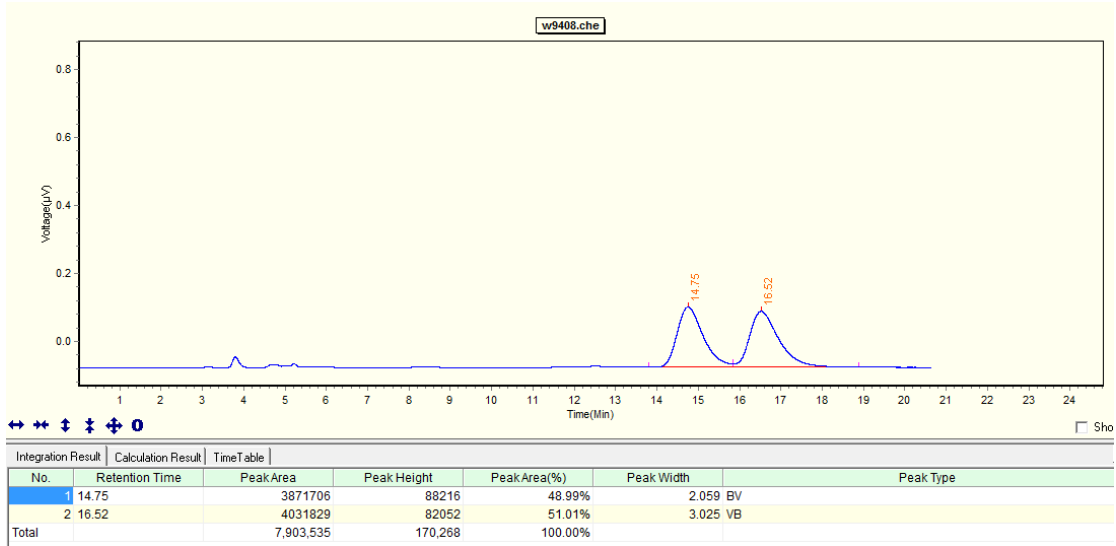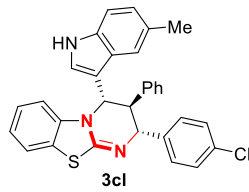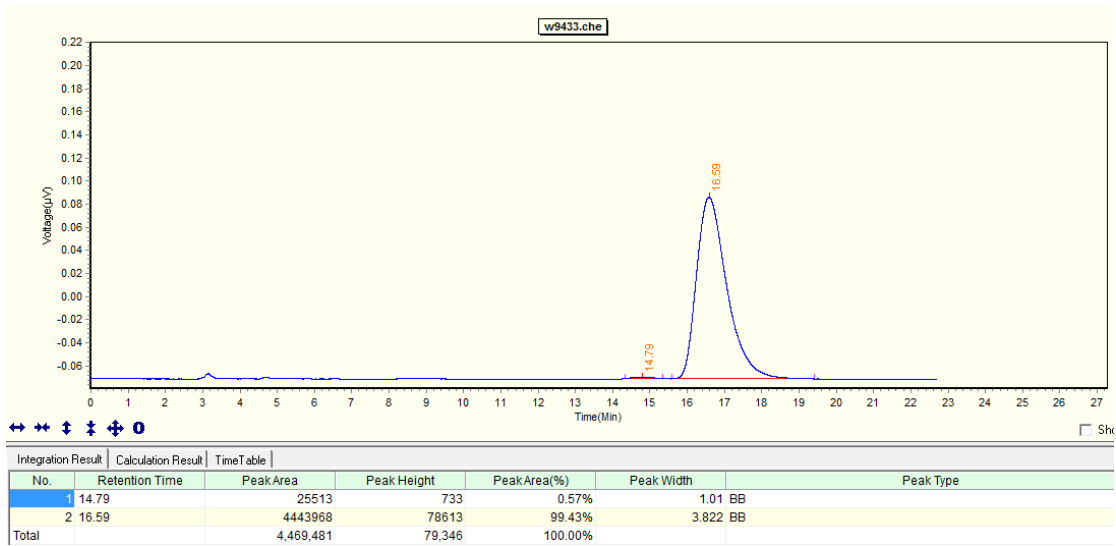

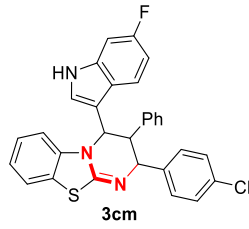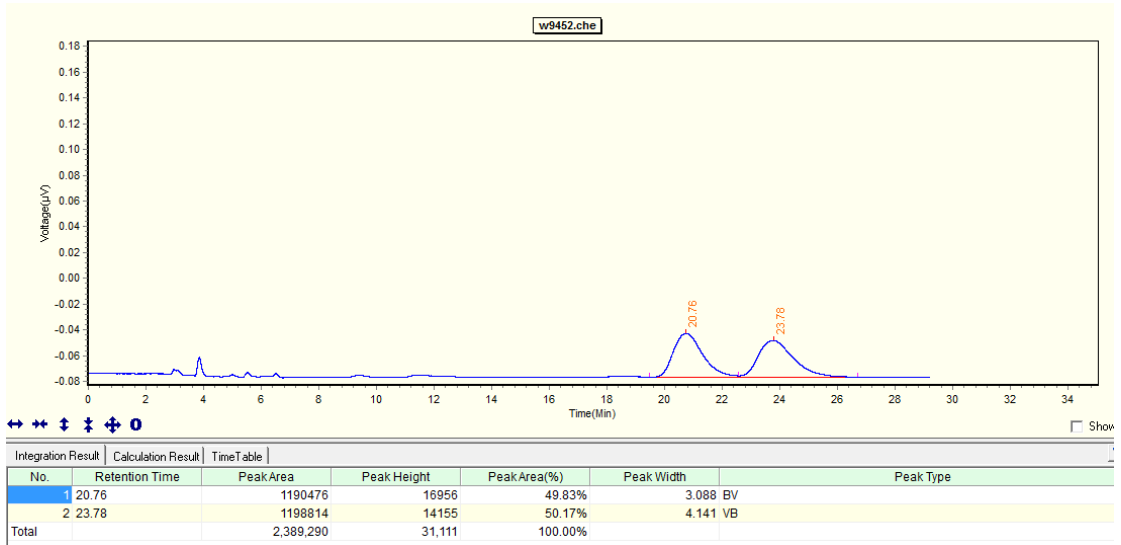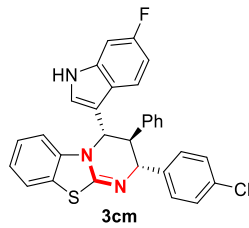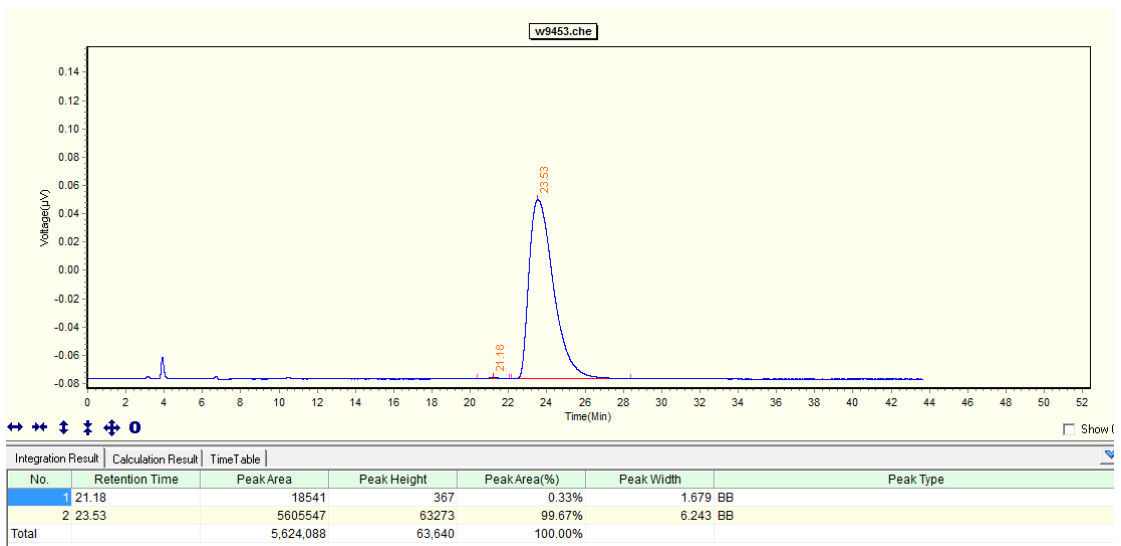

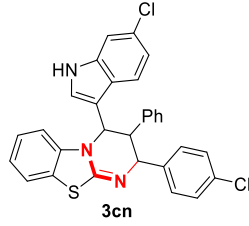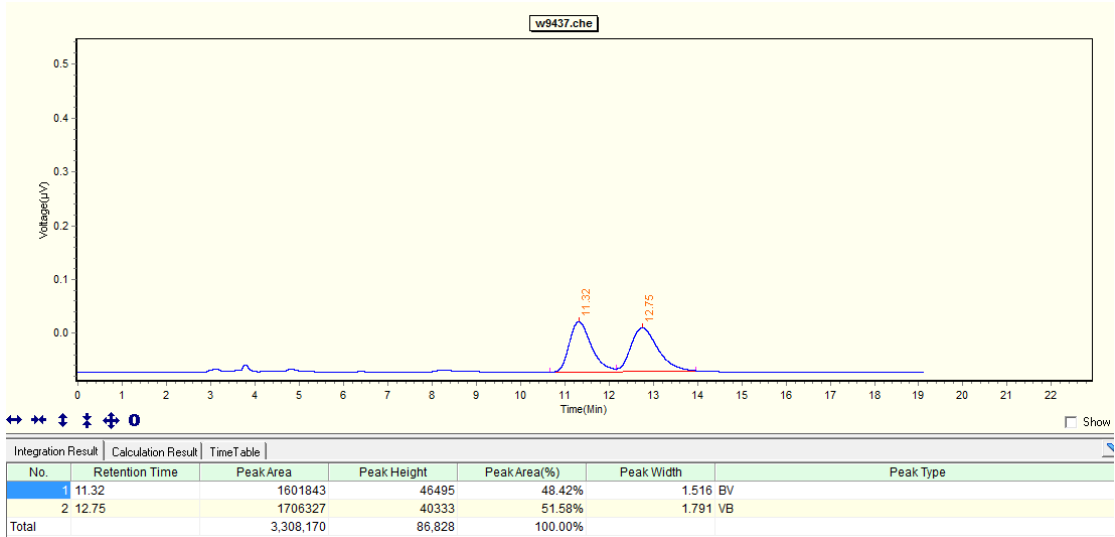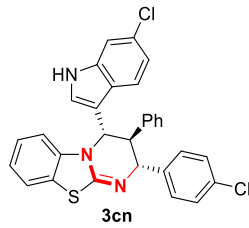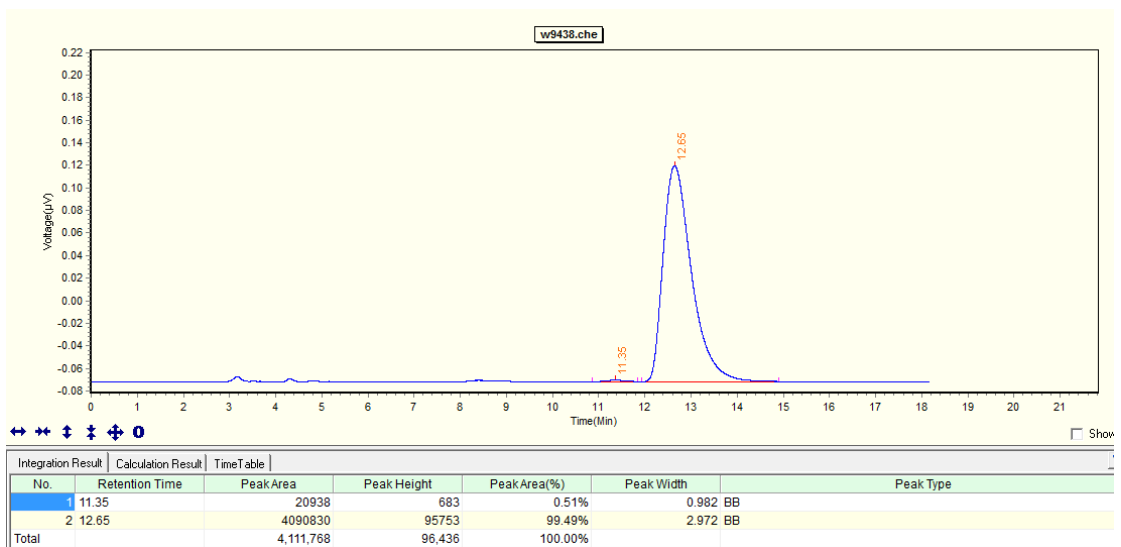

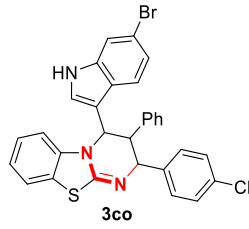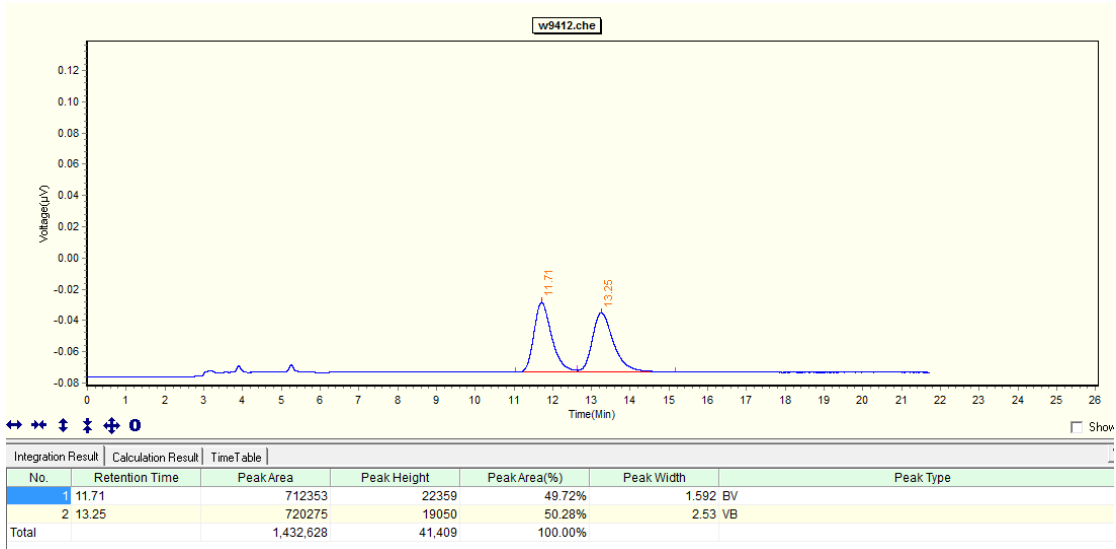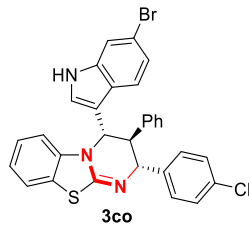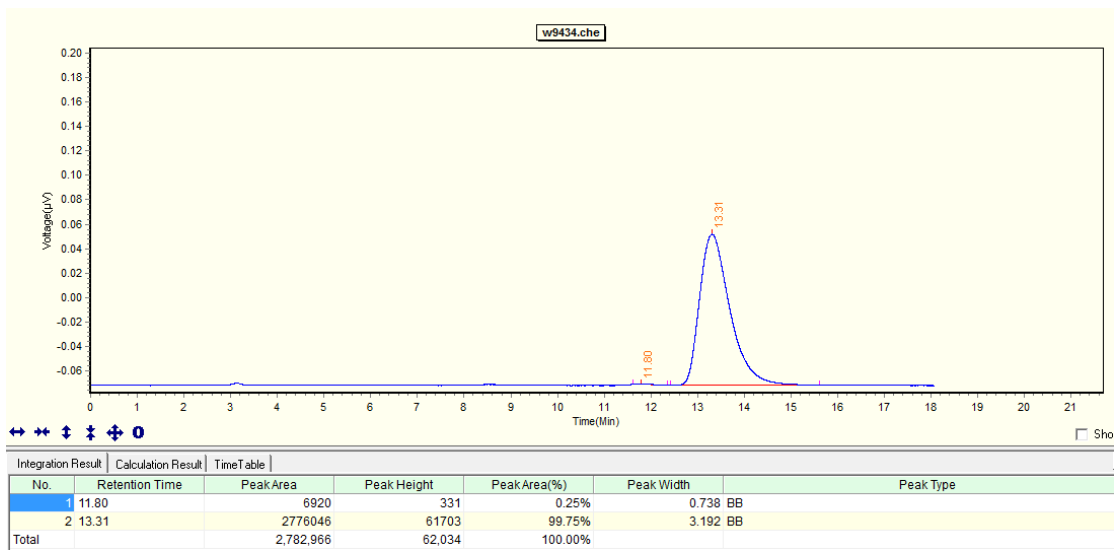

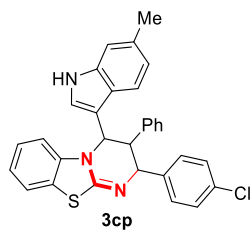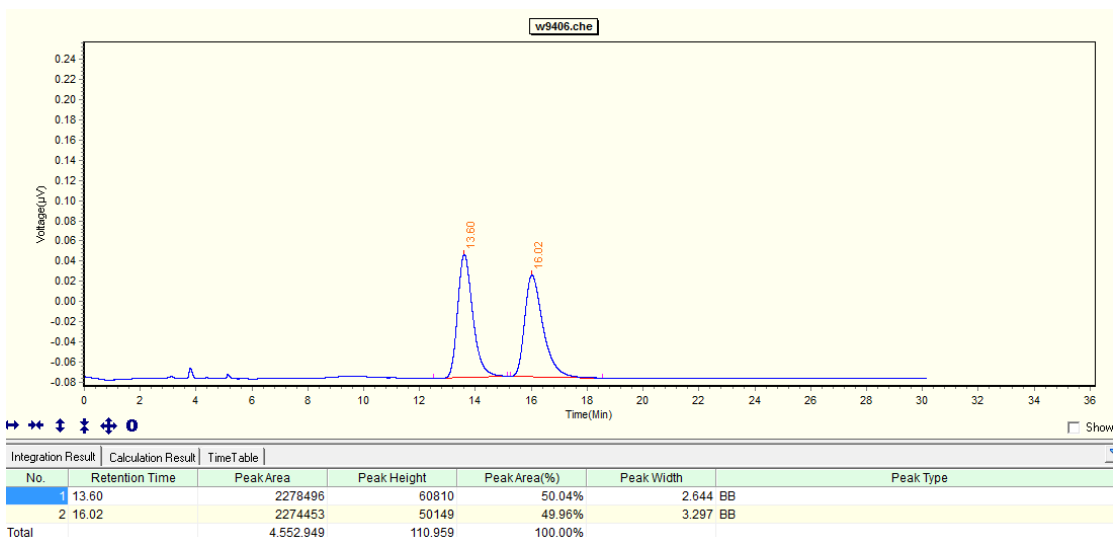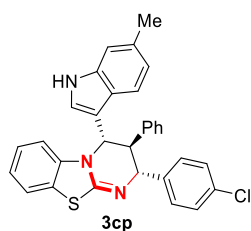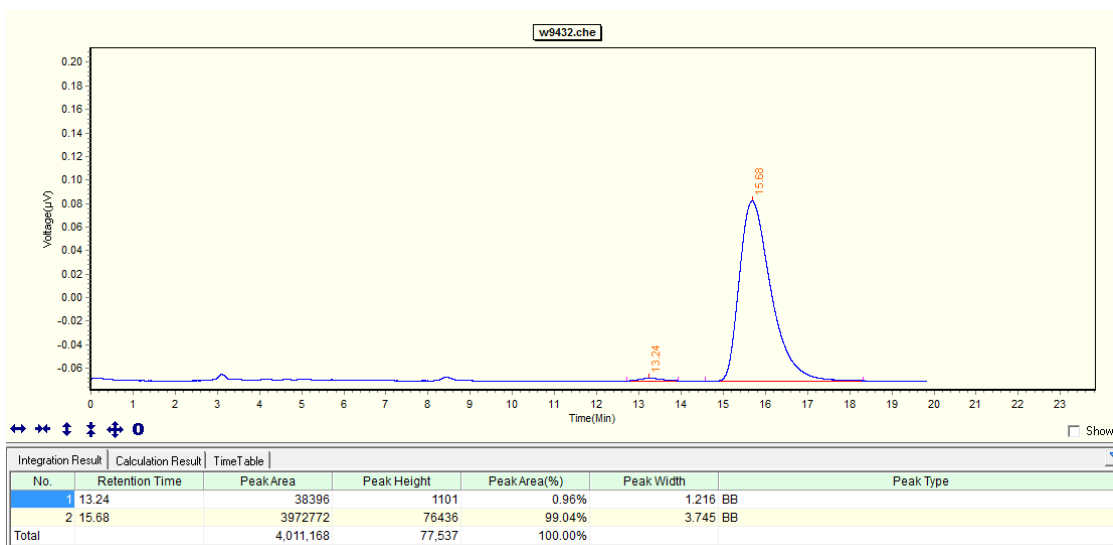



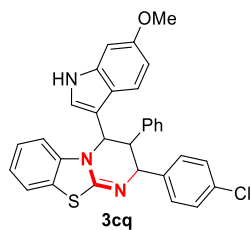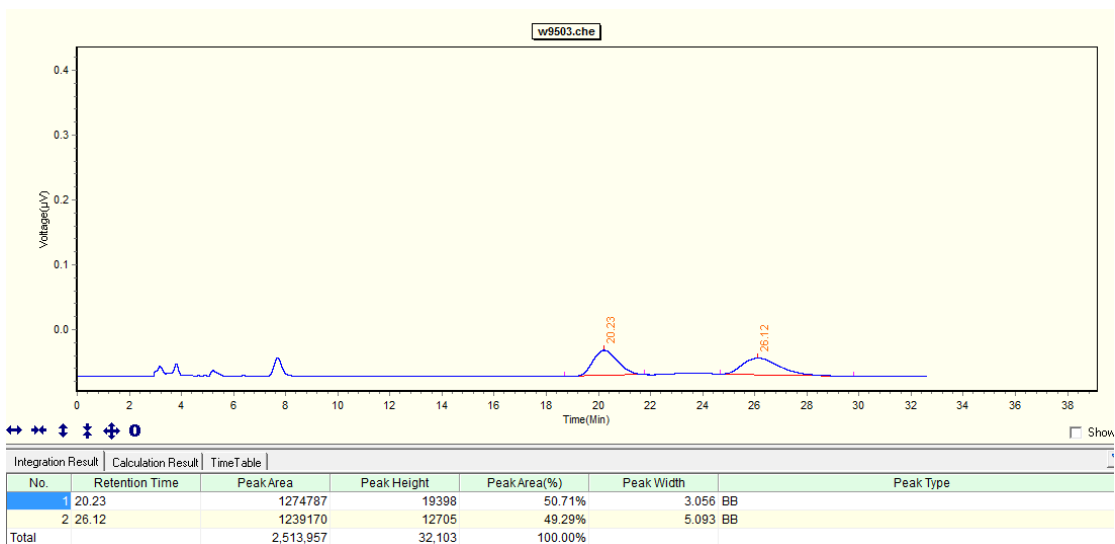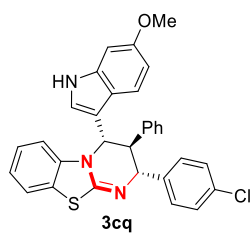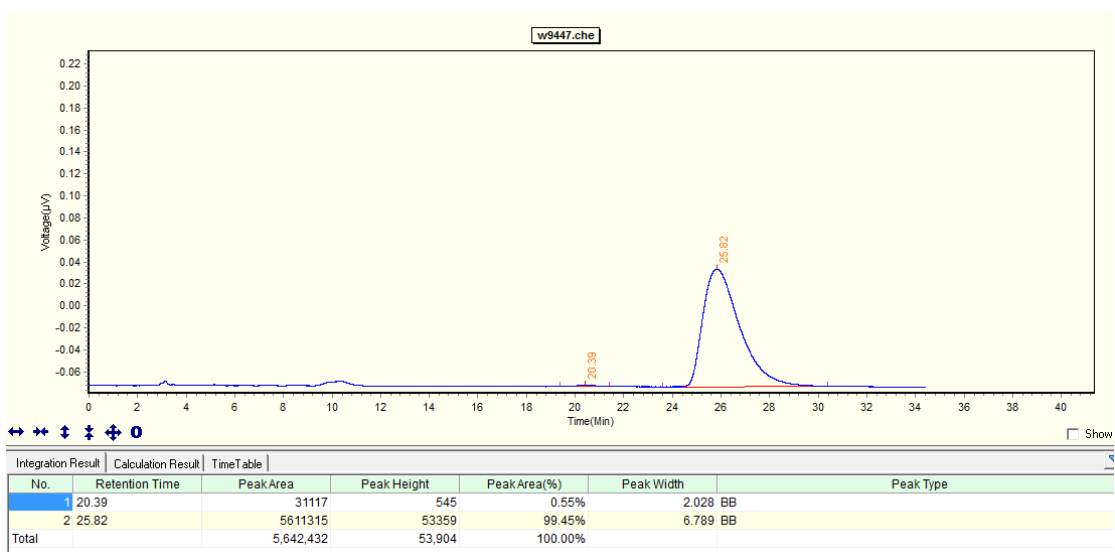

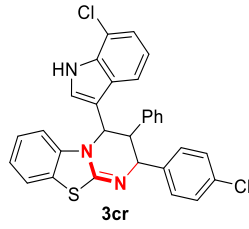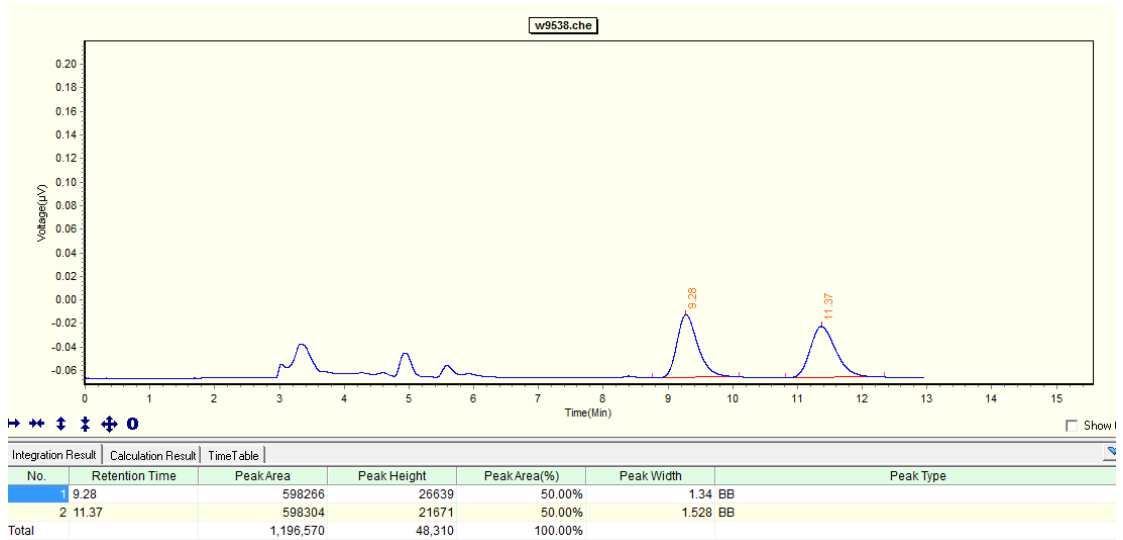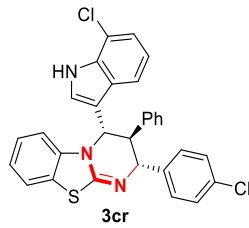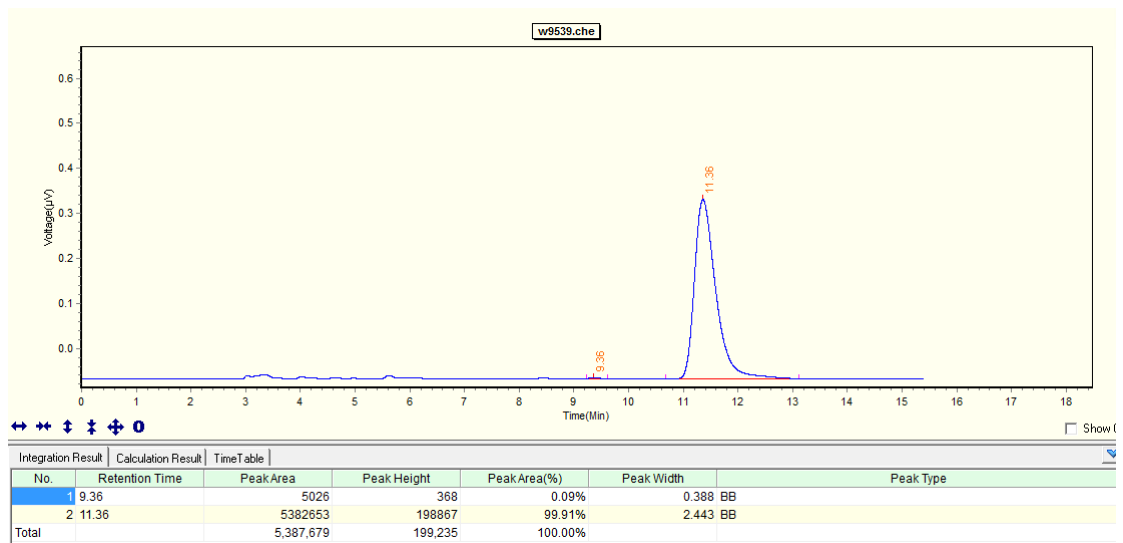

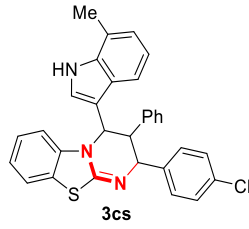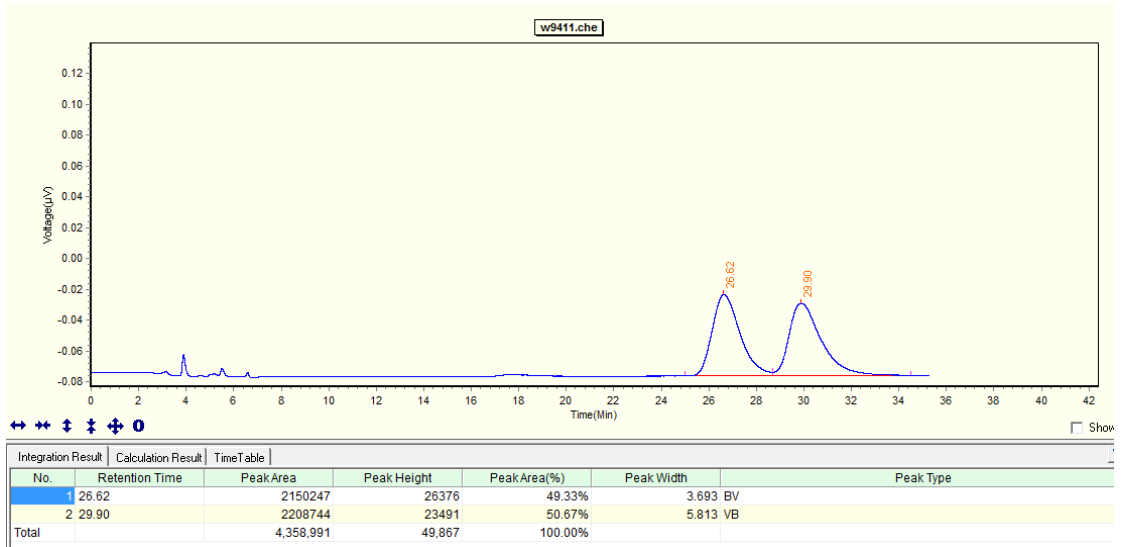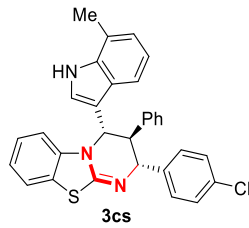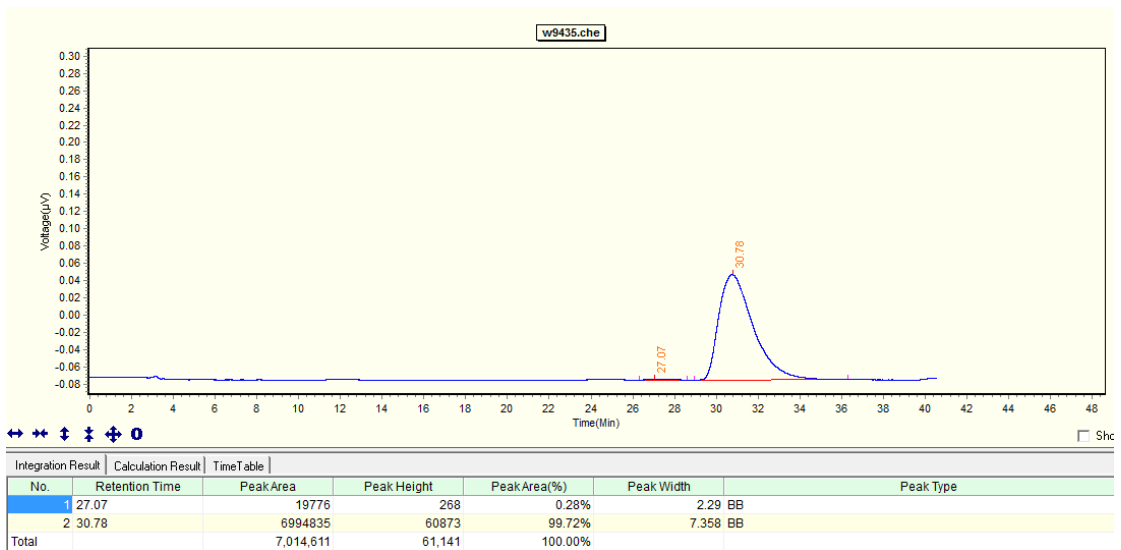

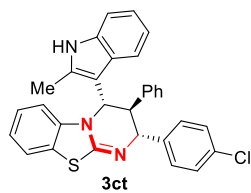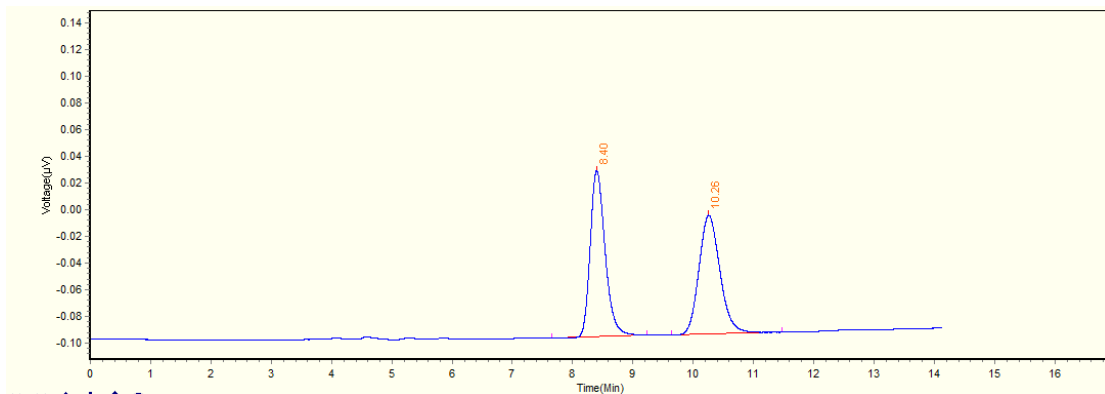

| No.   | Retention Time | PeakArea  | Peak Height | PeakArea(%) | Peak Width | Peak Type |
|-------|----------------|-----------|-------------|-------------|------------|-----------|
| 1     | 8.40           | 1069875   | 62196       | 49.76%      | 1.578      | BB        |
| 2     | 10.26          | 1080269   | 44529       | 50.24%      | 1.833      | BB        |
| Total |                | 2,150,144 | 106,725     | 100.00%     |            |           |

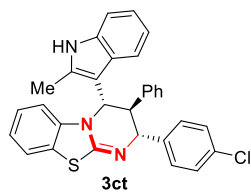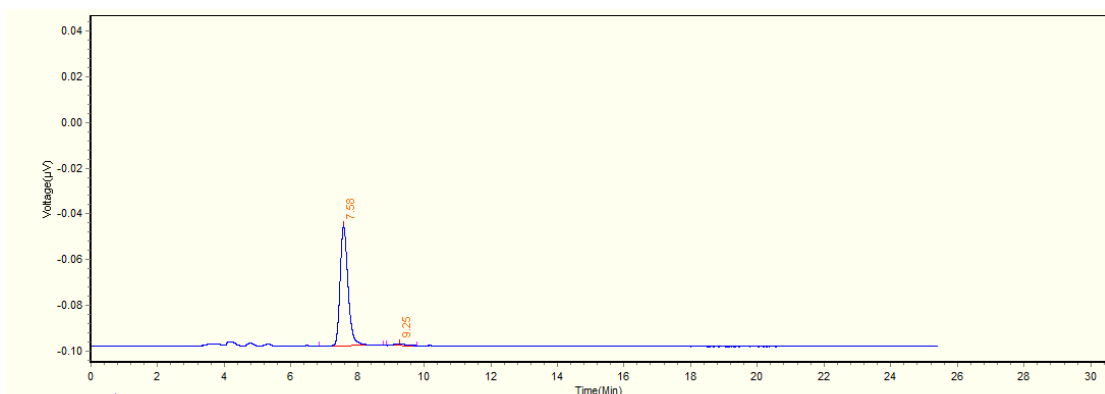

| No.   | Retention Time | PeakArea | Peak Height | PeakArea(%) | Peak Width | Peak Type |
|-------|----------------|----------|-------------|-------------|------------|-----------|
| 1     | 7.58           | 439079   | 26264       | 97.90%      | 1.926      | BB        |
| 2     | 9.25           | 9413     | 445         | 2.10%       | 0.917      | BB        |
| Total |                | 448,492  | 26,709      | 100.00%     |            |           |

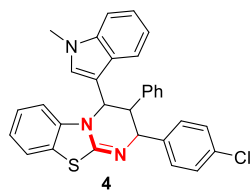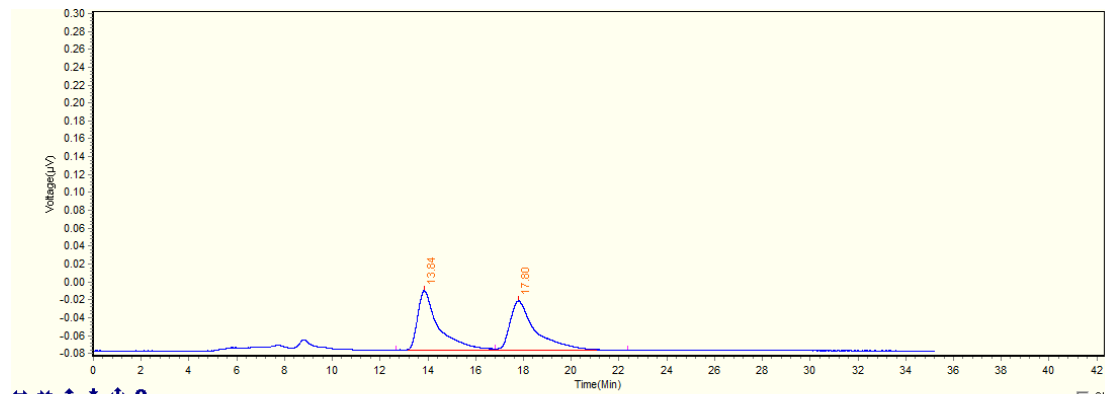

| No.   | Retention Time | PeakArea  | Peak Height | PeakArea(%) | Peak Width | Peak Type |
|-------|----------------|-----------|-------------|-------------|------------|-----------|
| 1     | 13.84          | 1998399   | 33016       | 49.50%      | 4.15 BV    |           |
| 2     | 17.80          | 2038543   | 27486       | 50.50%      | 5.547 VB   |           |
| Total |                | 4,036,942 | 60,502      | 100.00%     |            |           |

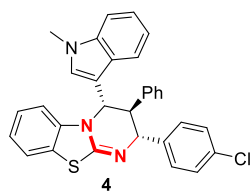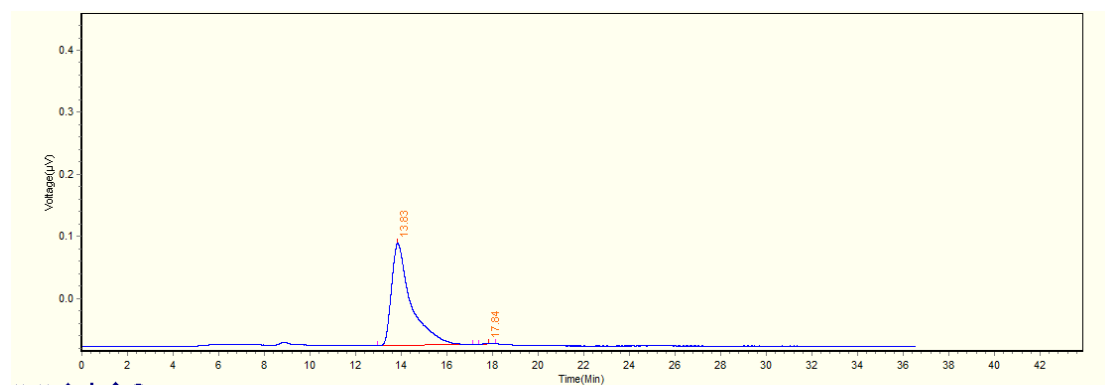

| No.   | Retention Time | PeakArea  | Peak Height | PeakArea(%) | Peak Width | Peak Type |
|-------|----------------|-----------|-------------|-------------|------------|-----------|
| 1     | 13.83          | 4884486   | 82280       | 99.67%      | 4.171 BB   |           |
| 2     | 17.84          | 16388     | 676         | 0.33%       | 0.746 BB   |           |
| Total |                | 4,900,874 | 82,956      | 100.00%     |            |           |

## 7. NMR Spectra of compounds.

$^1\text{H}$  NMR spectrum of compound **3aa** ( $(\text{CD}_3)_2\text{SO}$ , 400 MHz)

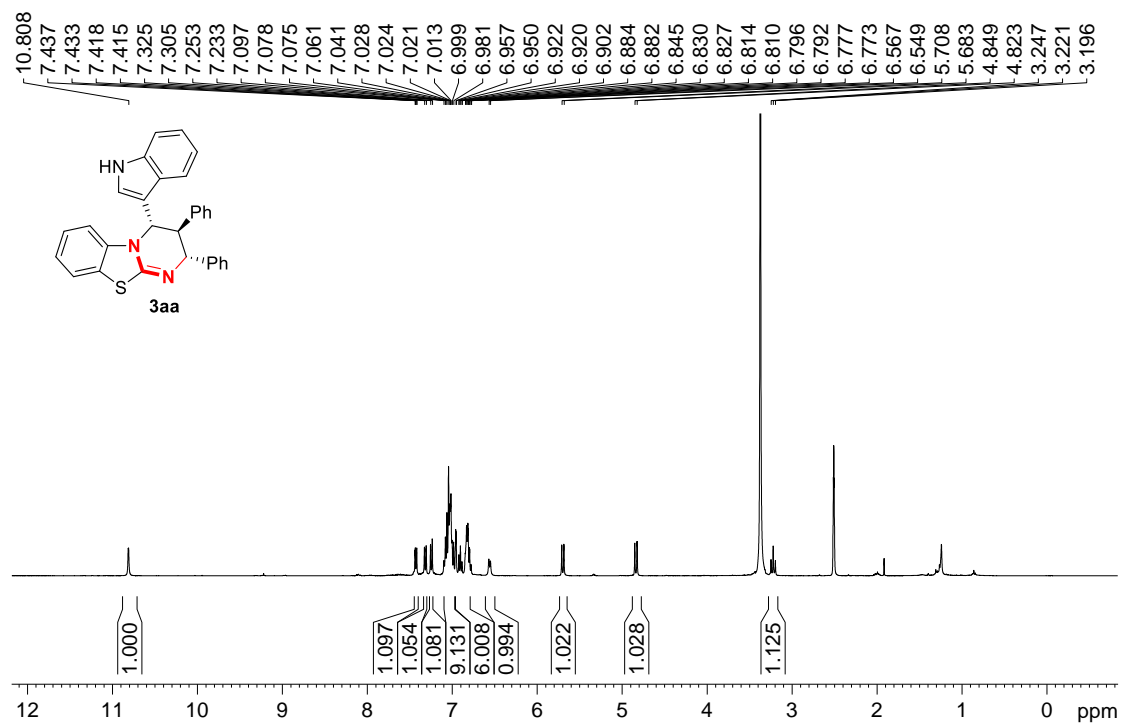

$^{13}\text{C}$  NMR spectrum of compound **3aa** ( $(\text{CD}_3)_2\text{SO}$ , 100 MHz)

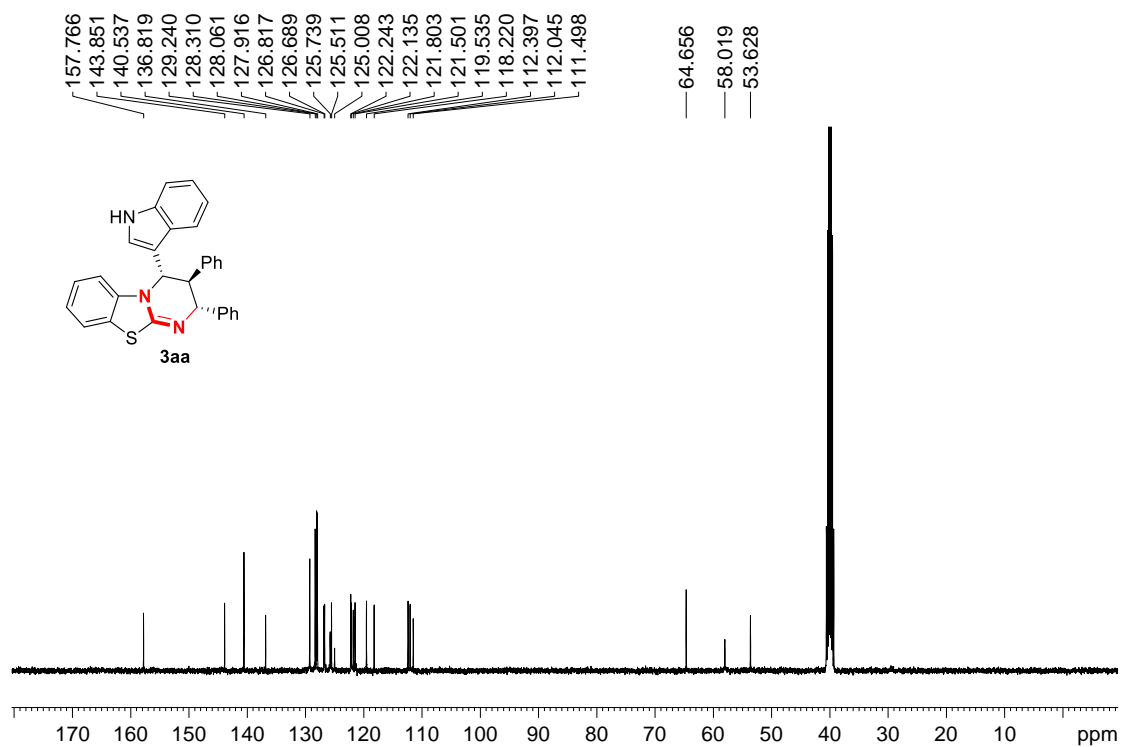

<sup>1</sup>H NMR spectrum of compound **3ba** ((CD<sub>3</sub>)<sub>2</sub>SO, 400 MHz)

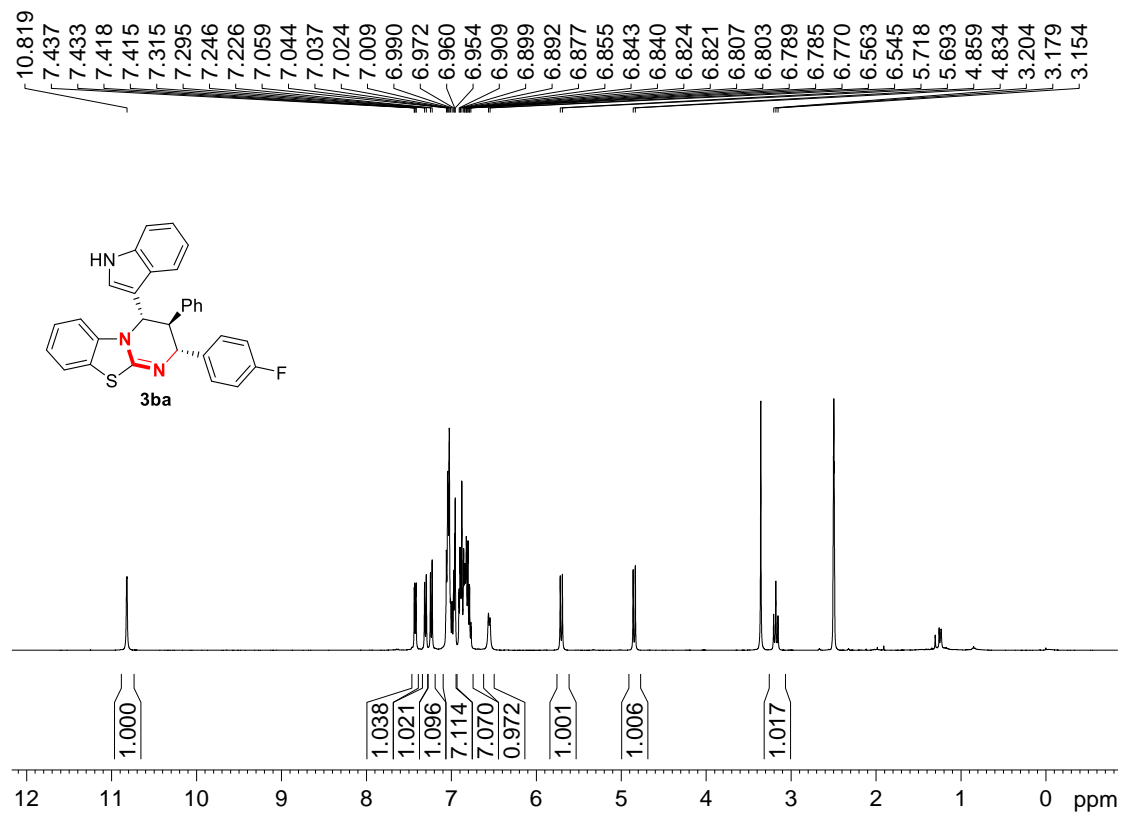

<sup>13</sup>C NMR spectrum of compound **3ba** ((CD<sub>3</sub>)<sub>2</sub>SO, 100 MHz)

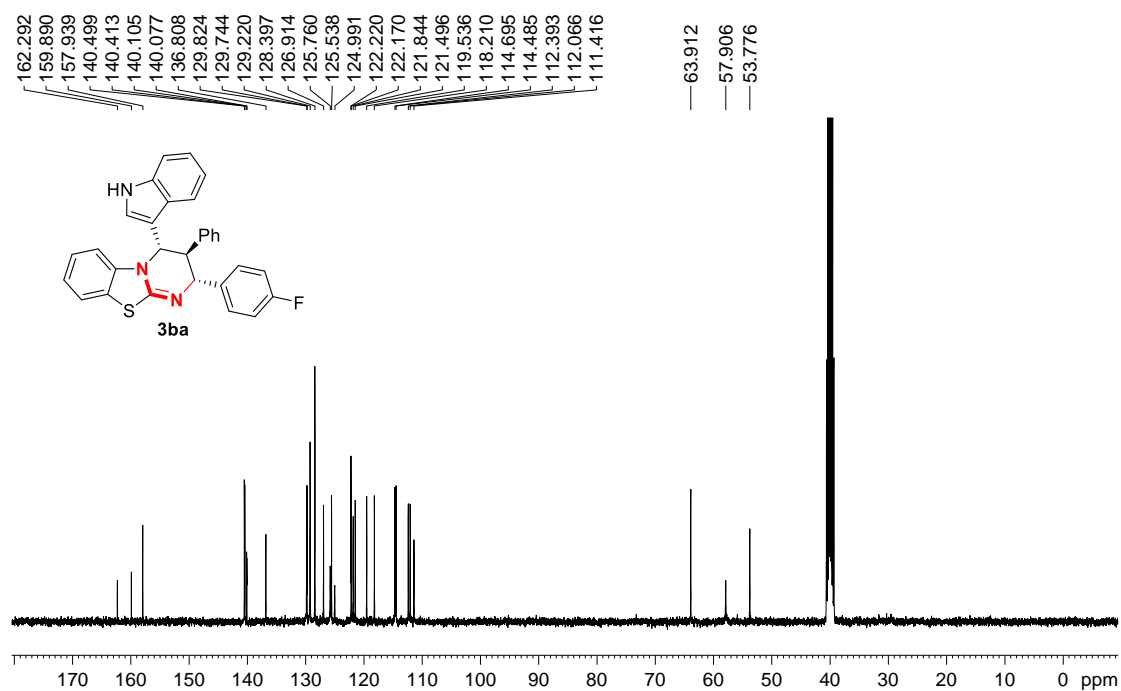

$^{19}\text{F}$  NMR spectrum of compound **3ba** ( $(\text{CD}_3)_2\text{SO}$ , 376 MHz)

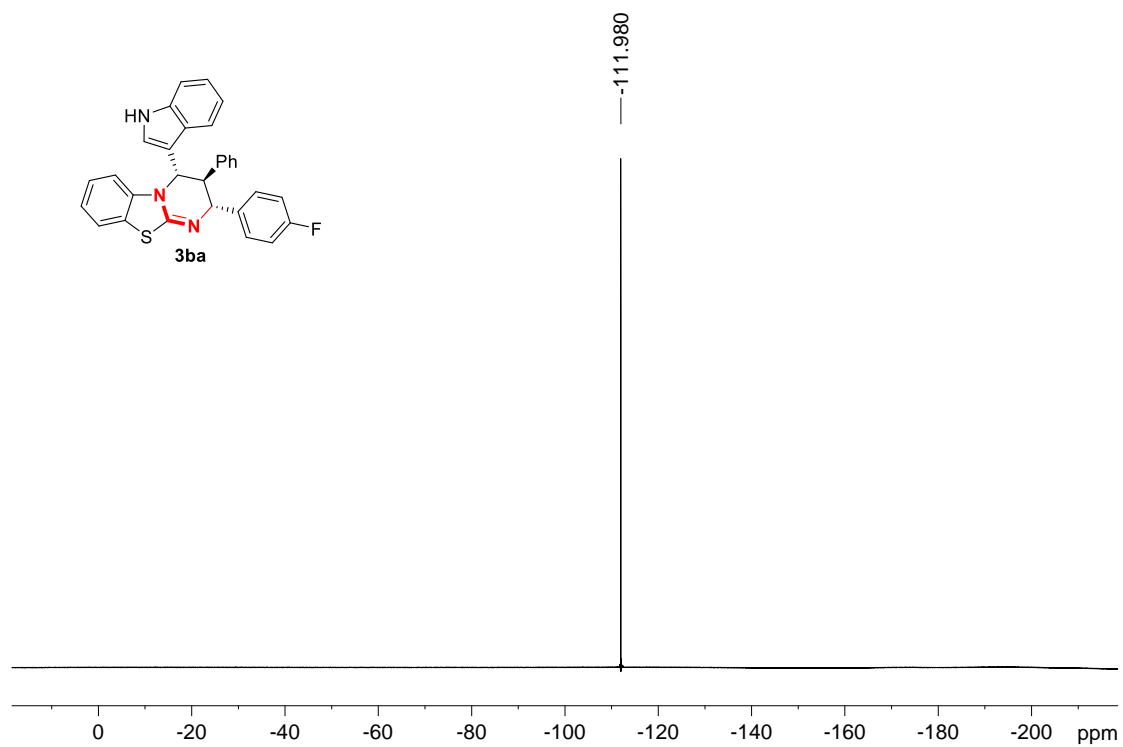



<sup>1</sup>H NMR spectrum of compound **3ca** ((CD<sub>3</sub>)<sub>2</sub>SO, 400 MHz)

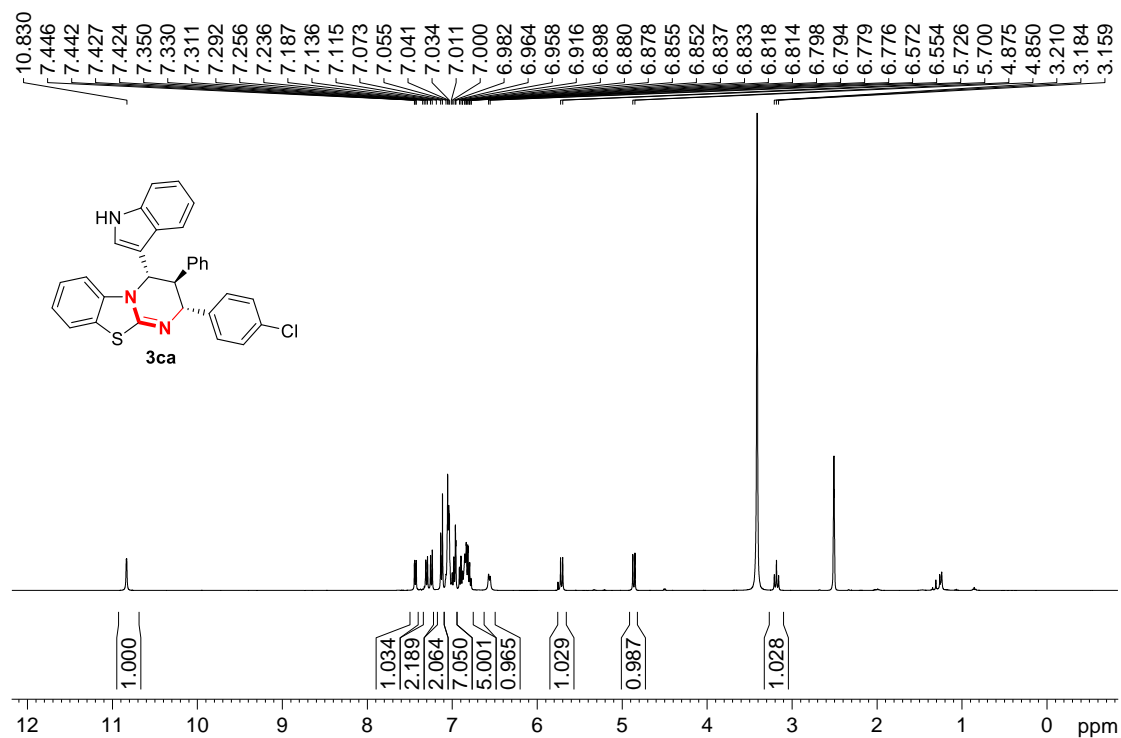

<sup>13</sup>C NMR spectrum of compound **3ca** ((CD<sub>3</sub>)<sub>2</sub>SO, 100 MHz)

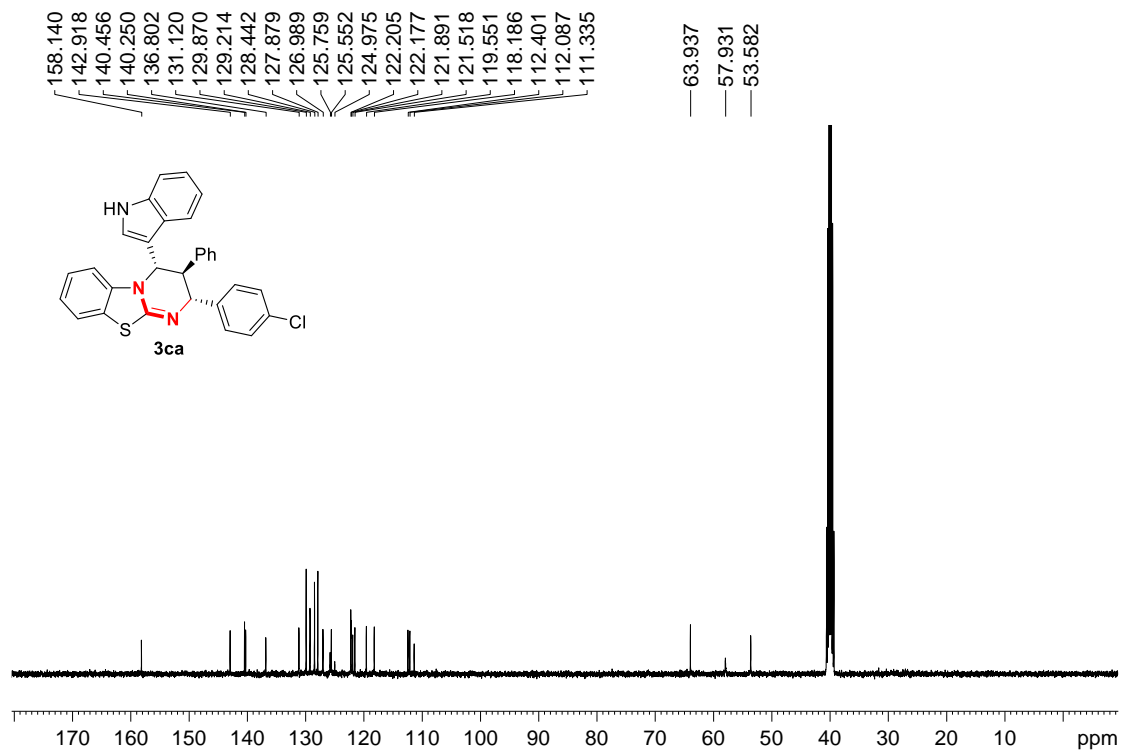

<sup>1</sup>H NMR spectrum of compound **3da** ((CD<sub>3</sub>)<sub>2</sub>SO, 400 MHz)

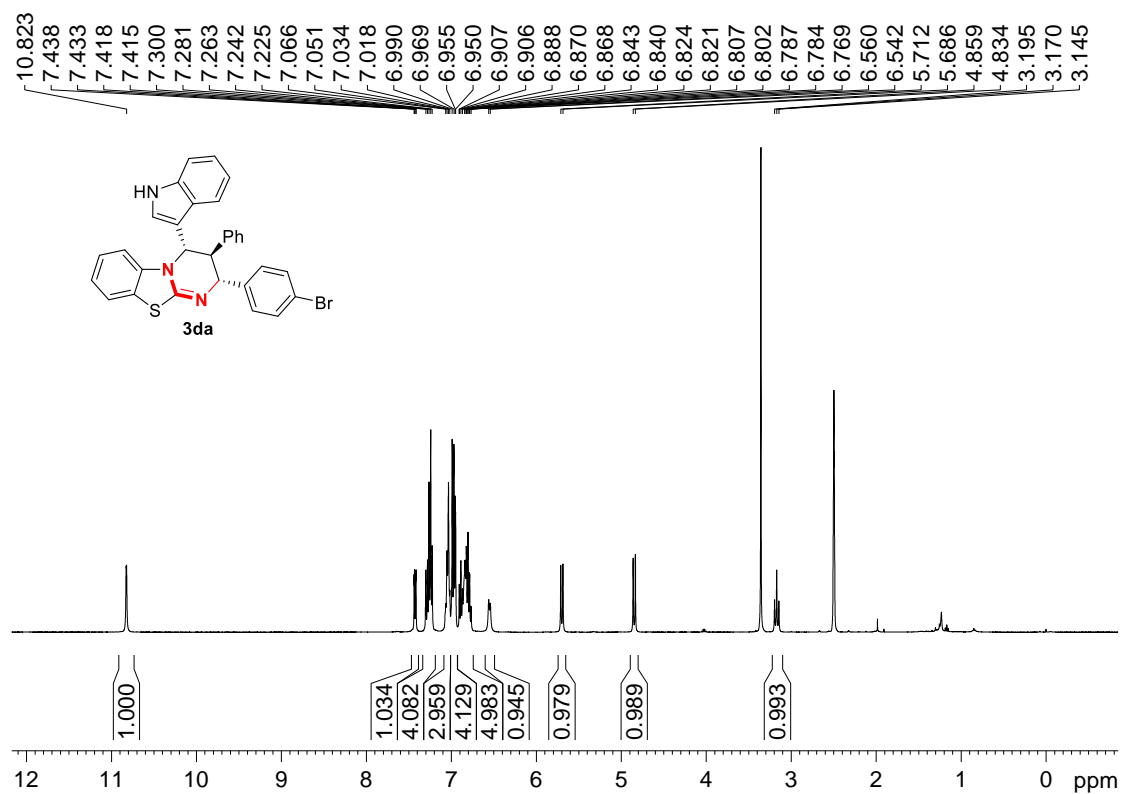

<sup>13</sup>C NMR spectrum of compound **3da** ((CD<sub>3</sub>)<sub>2</sub>SO, 100 MHz)

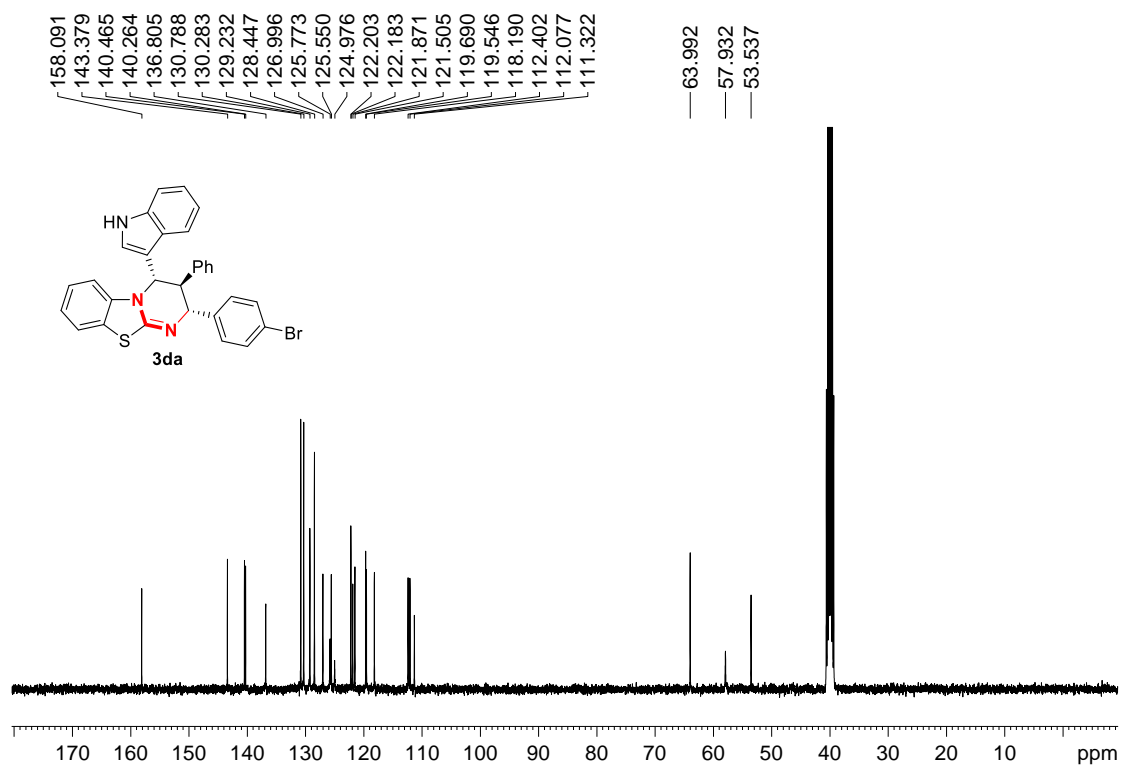

<sup>1</sup>H NMR spectrum of compound **3ea** ((CD<sub>3</sub>)<sub>2</sub>SO, 400 MHz)

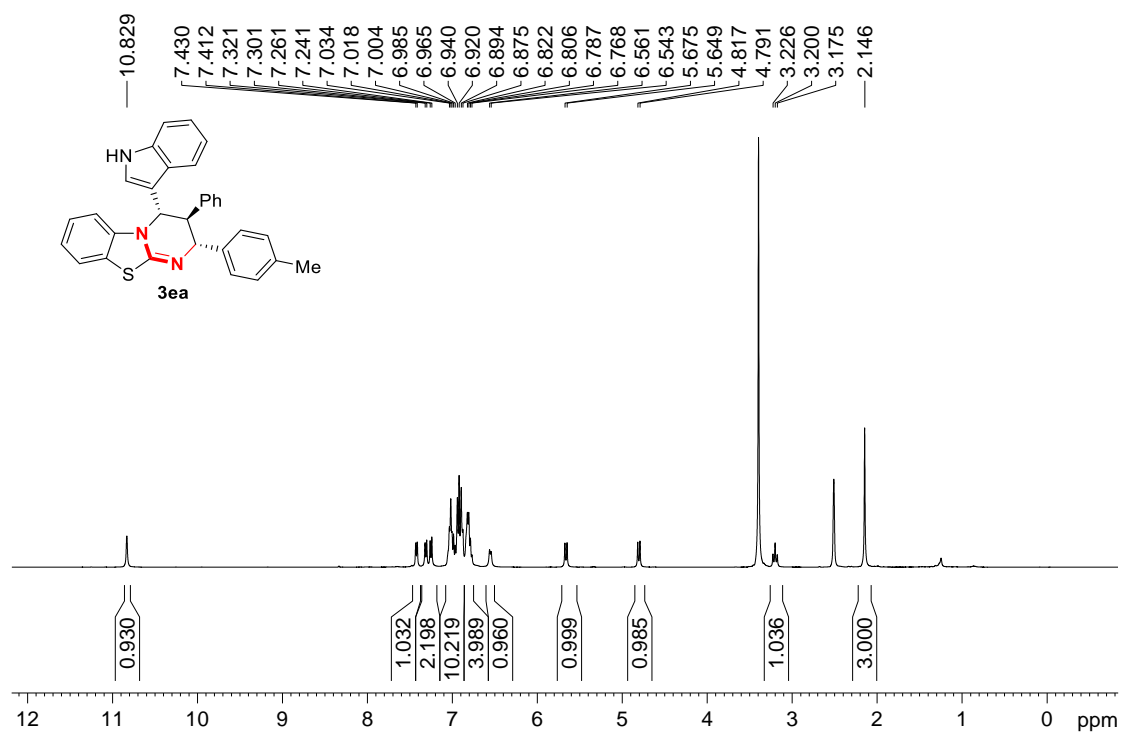

<sup>13</sup>C NMR spectrum of compound **3ea** ((CD<sub>3</sub>)<sub>2</sub>SO, 100 MHz)

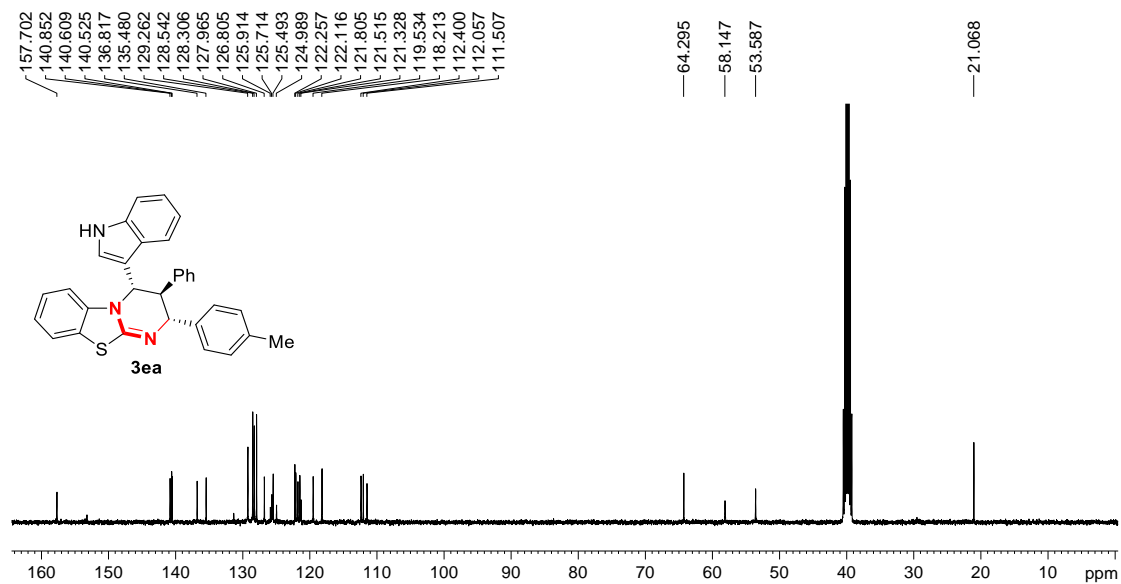

<sup>1</sup>H NMR spectrum of compound **3fa** ((CD<sub>3</sub>)<sub>2</sub>SO, 400 MHz)

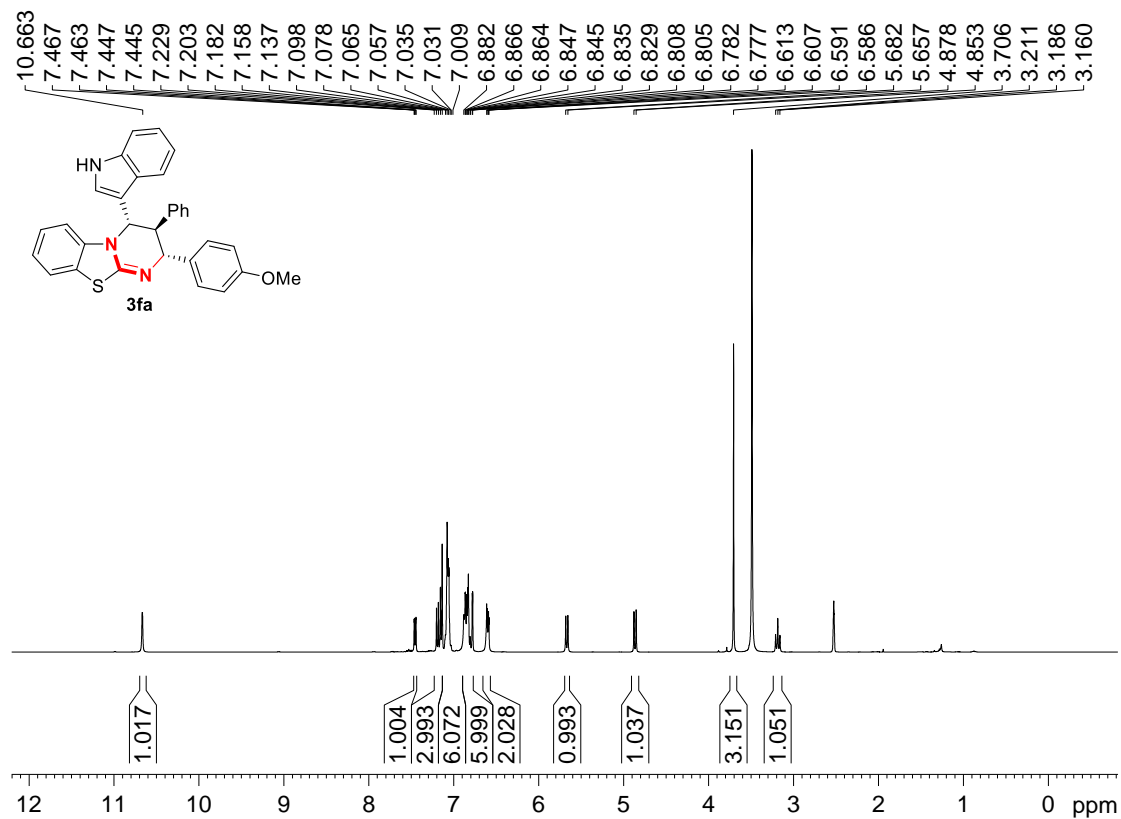

<sup>13</sup>C NMR spectrum of compound **3fa** ((CD<sub>3</sub>)<sub>2</sub>SO, 100 MHz)

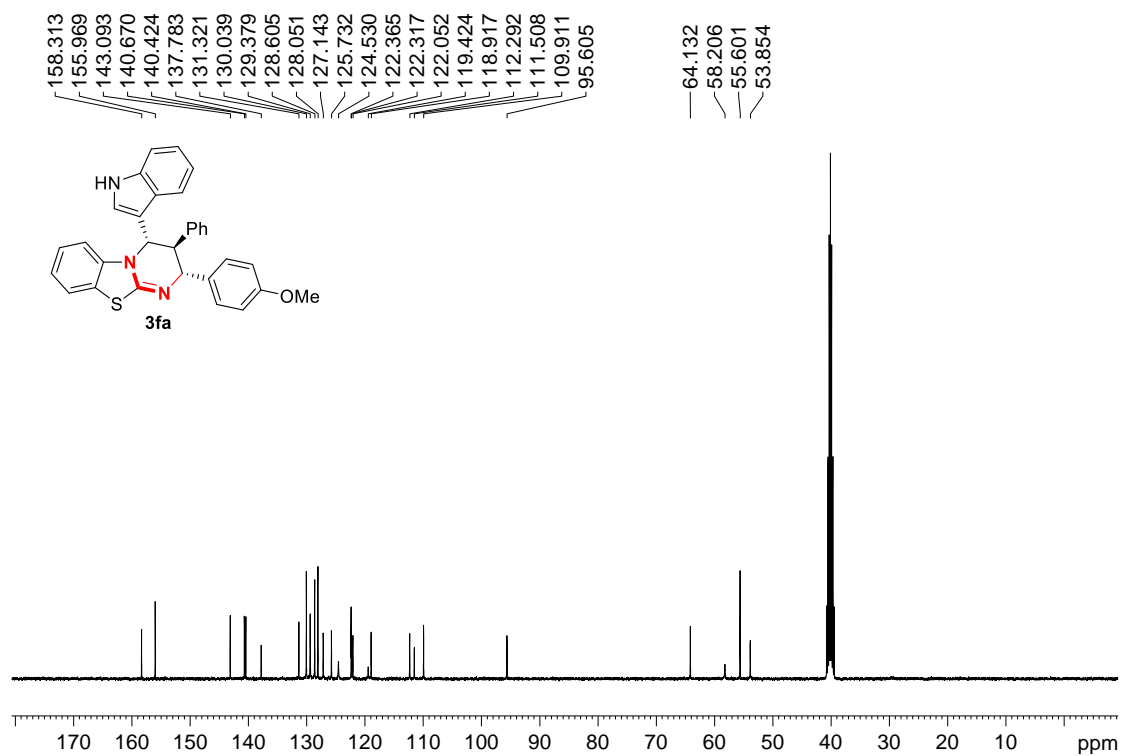

$^1\text{H}$  NMR spectrum of compound **3ga** ( $(\text{CD}_3)_2\text{SO}$ , 400 MHz)

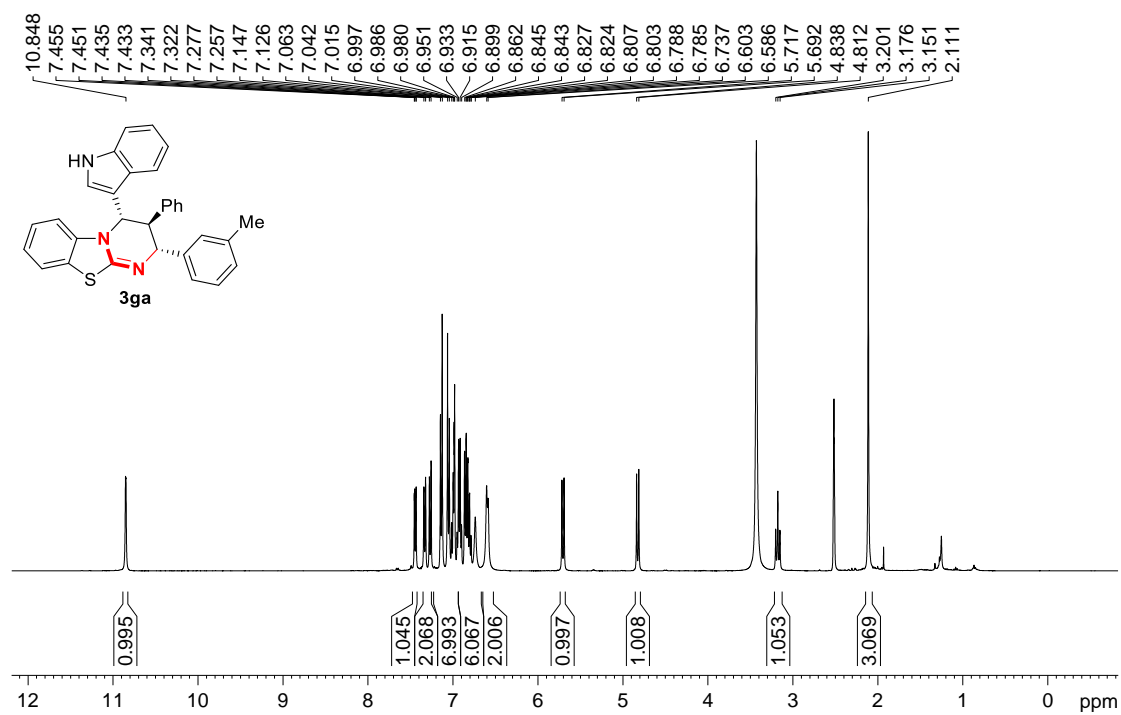

$^{13}\text{C}$  NMR spectrum of compound **3ga** ( $(\text{CD}_3)_2\text{SO}$ , 100 MHz)

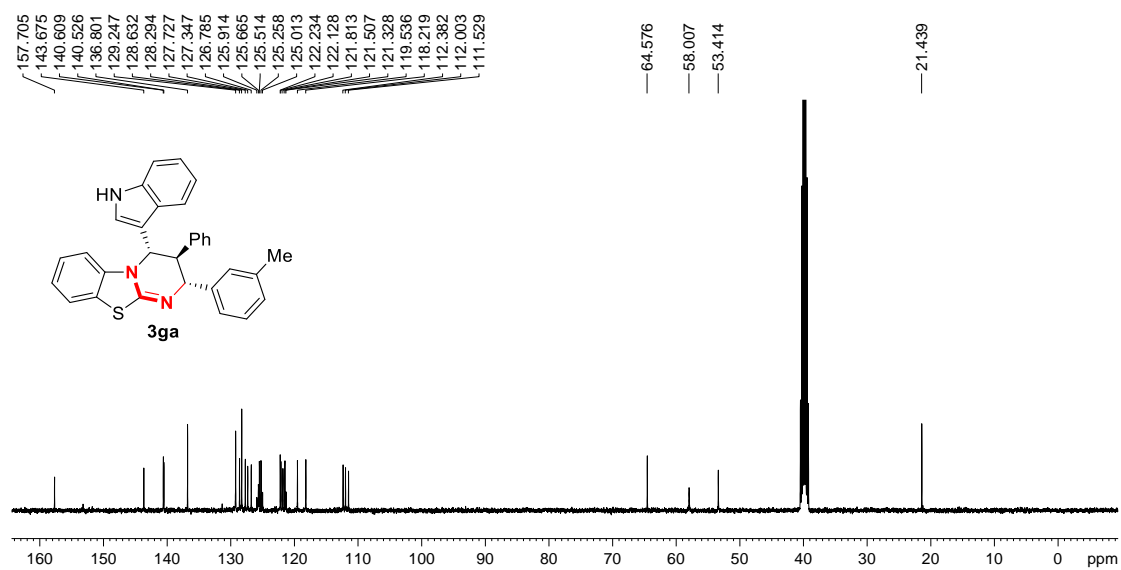

<sup>1</sup>H NMR spectrum of compound **3ha** ((CD<sub>3</sub>)<sub>2</sub>SO, 400 MHz)

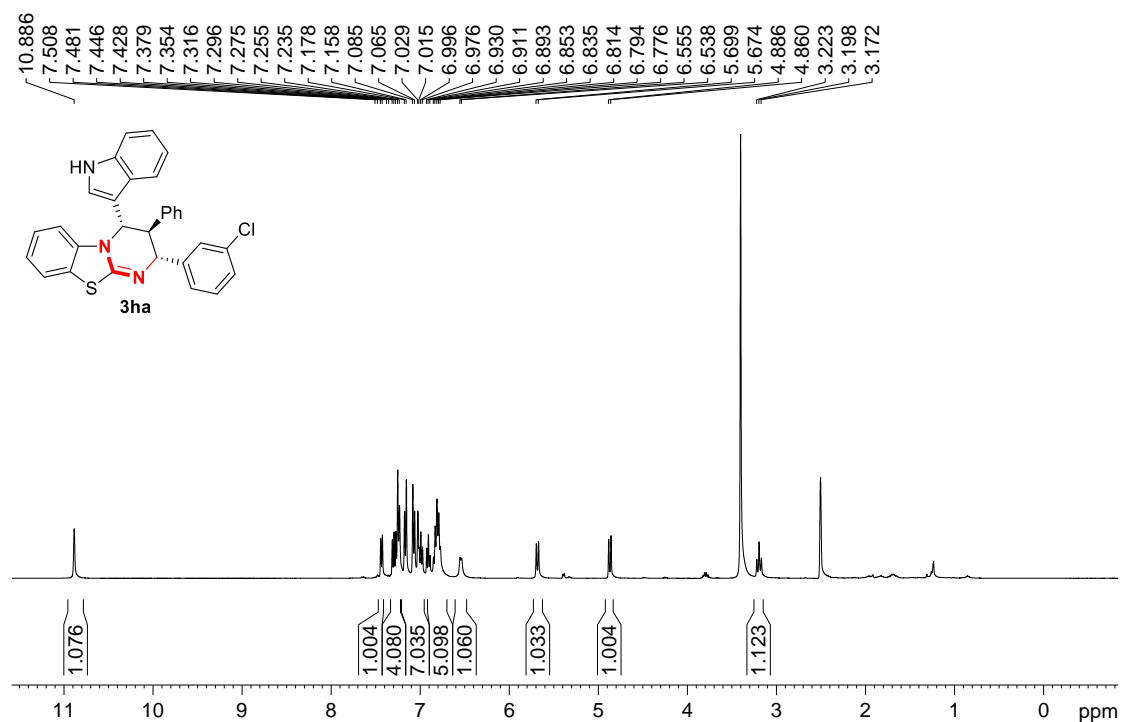

<sup>13</sup>C NMR spectrum of compound **3ha** ((CD<sub>3</sub>)<sub>2</sub>SO, 100 MHz)

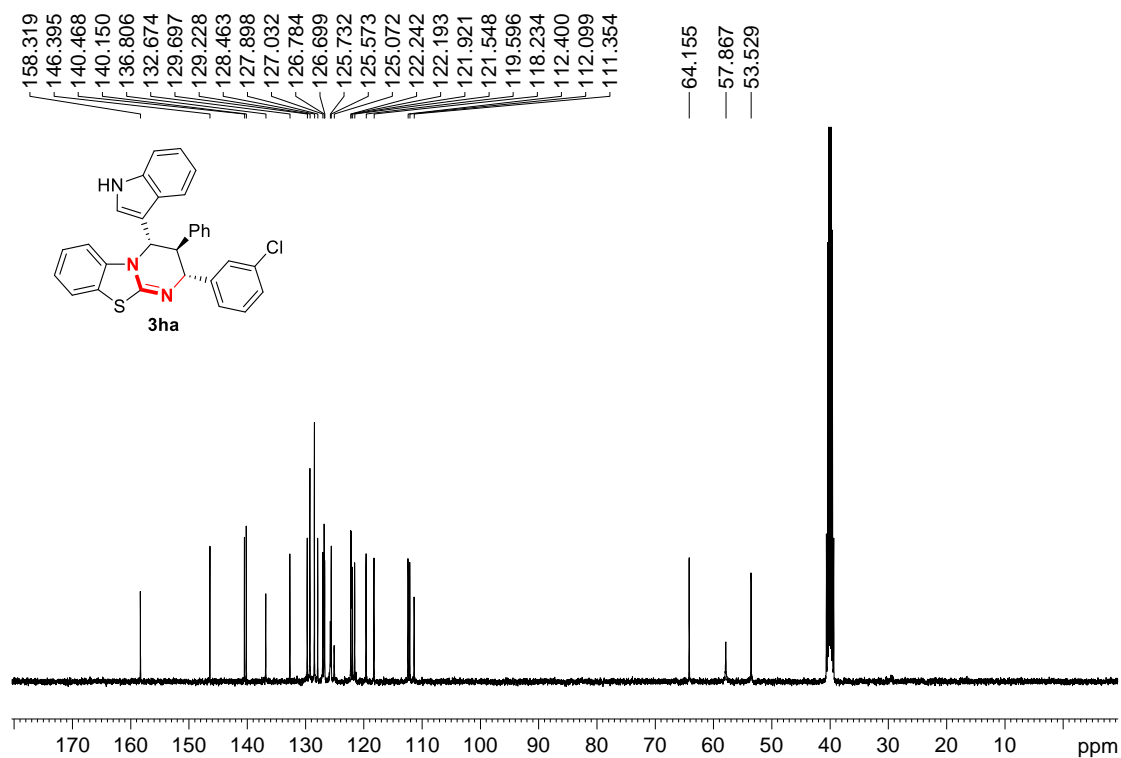

<sup>1</sup>H NMR spectrum of compound **3ia** ((CD<sub>3</sub>)<sub>2</sub>SO, 400 MHz)

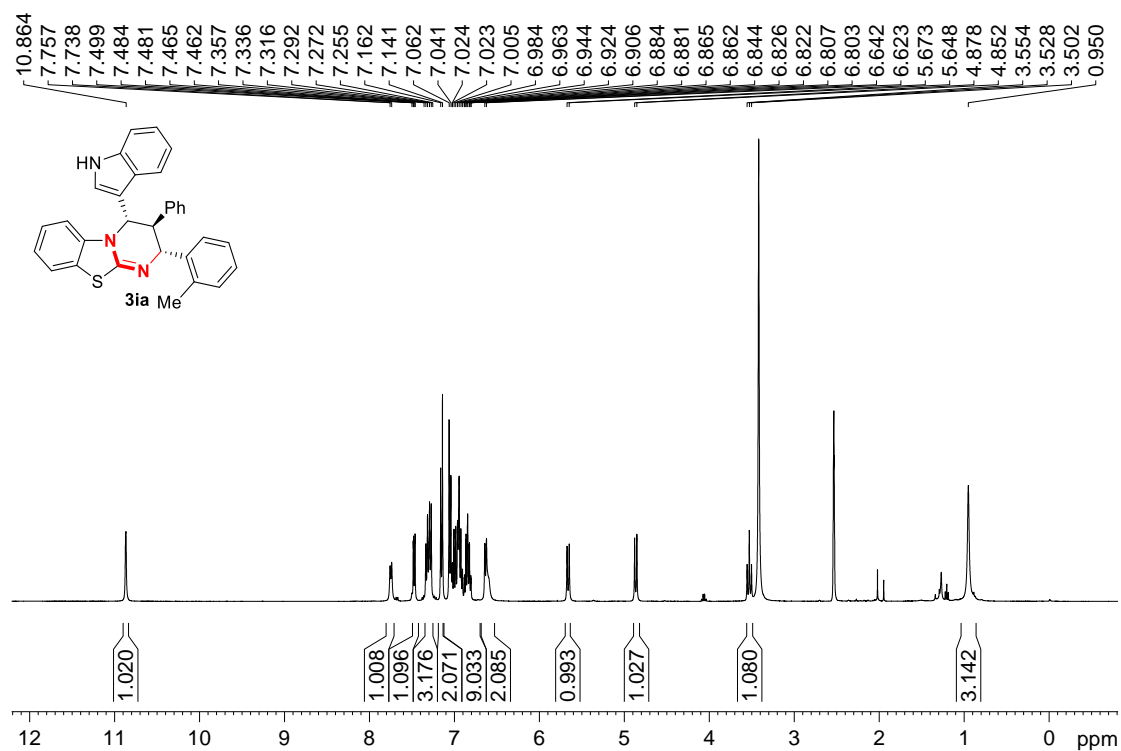

<sup>13</sup>C NMR spectrum of compound **3ia** ((CD<sub>3</sub>)<sub>2</sub>SO, 100 MHz)

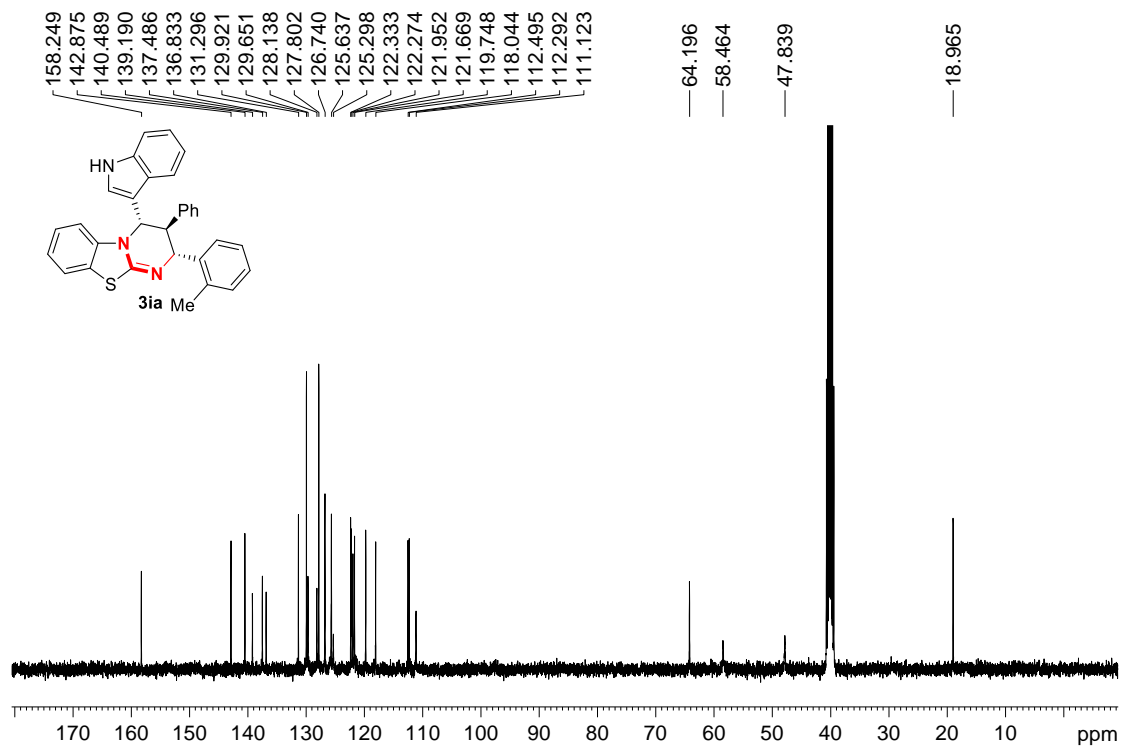

$^1\text{H}$  NMR spectrum of compound **3ja** ( $(\text{CD}_3)_2\text{SO}$ , 400 MHz)

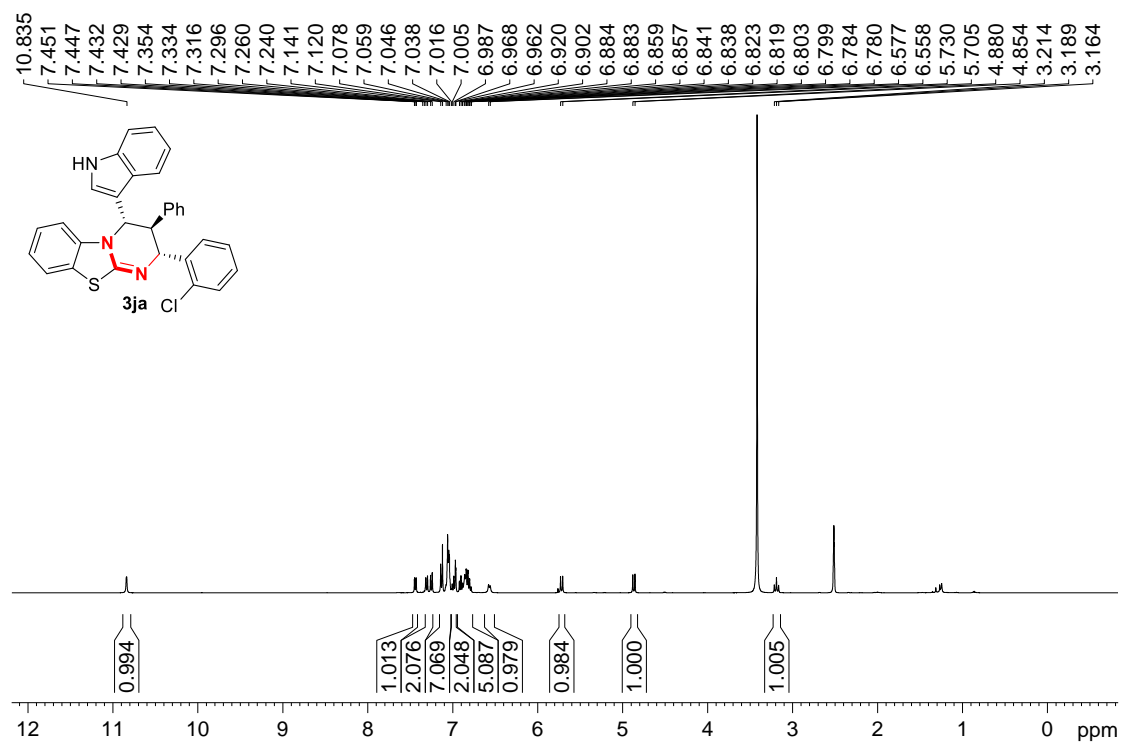

$^{13}\text{C}$  NMR spectrum of compound **3ja** ( $(\text{CD}_3)_2\text{SO}$ , 100 MHz)

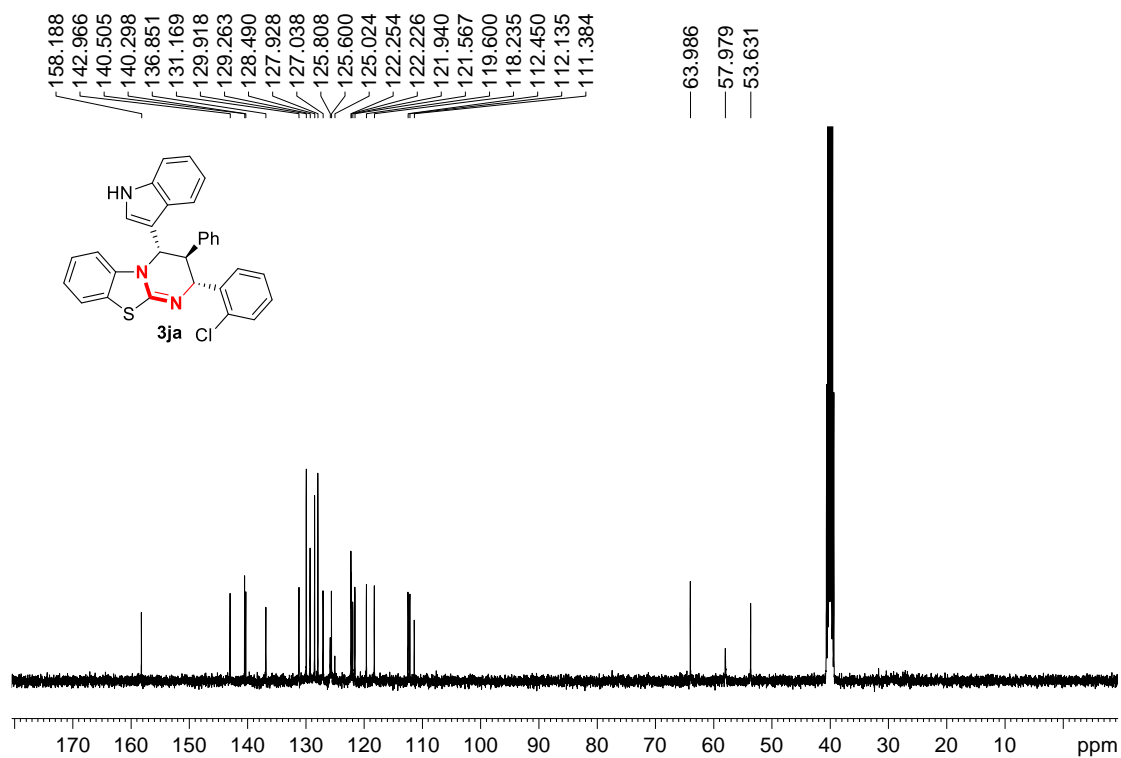



$^1\text{H}$  NMR spectrum of compound **3ka** ( $(\text{CD}_3)_2\text{SO}$ , 400 MHz)

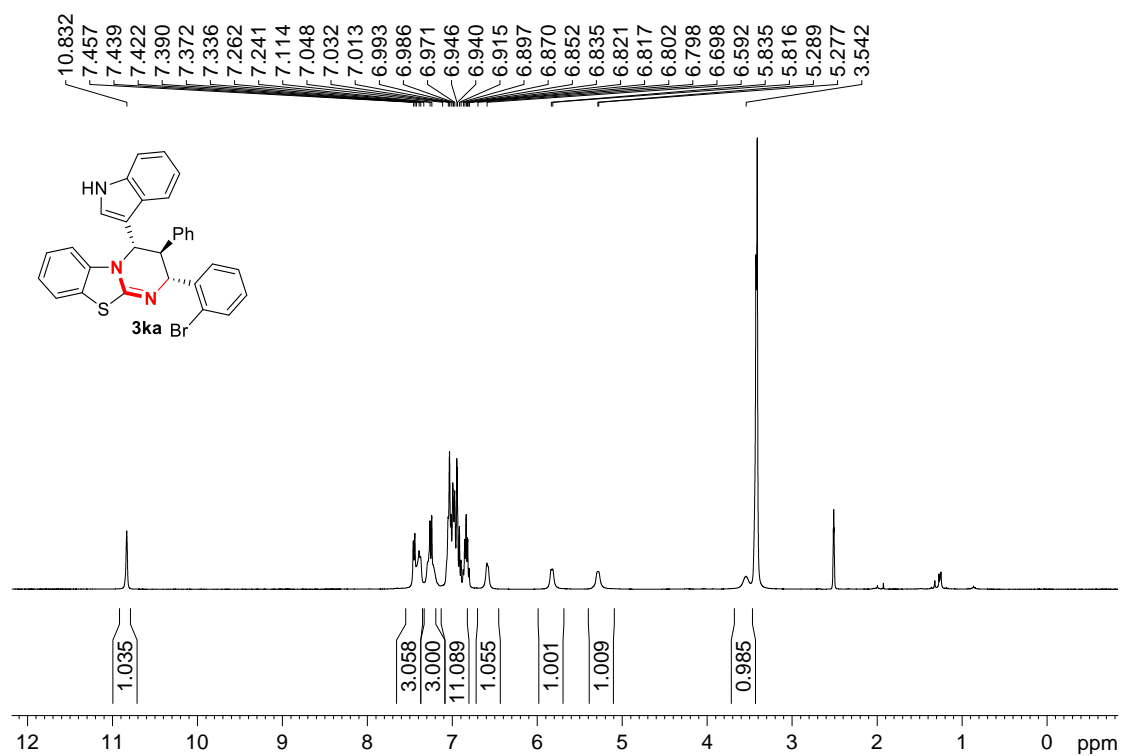

$^{13}\text{C}$  NMR spectrum of compound **3ka** ( $(\text{CD}_3)_2\text{SO}$ , 100 MHz)

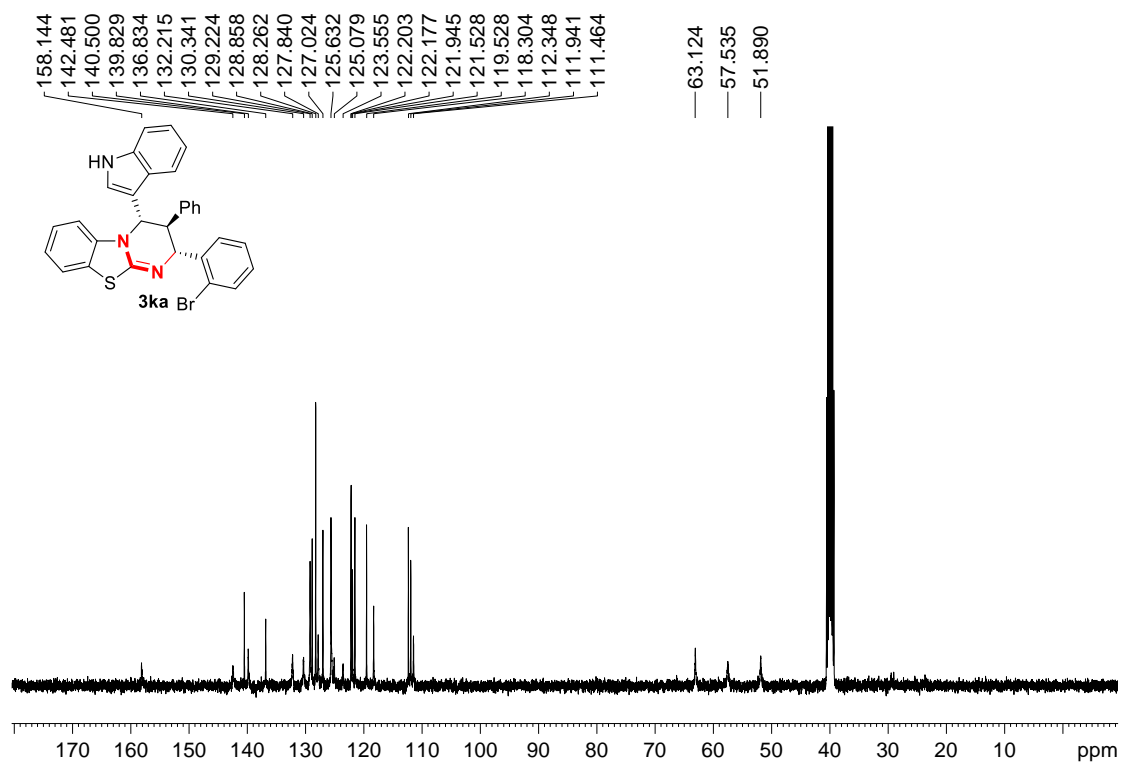

<sup>1</sup>H NMR spectrum of compound **3la** ((CD<sub>3</sub>)<sub>2</sub>SO, 400 MHz)

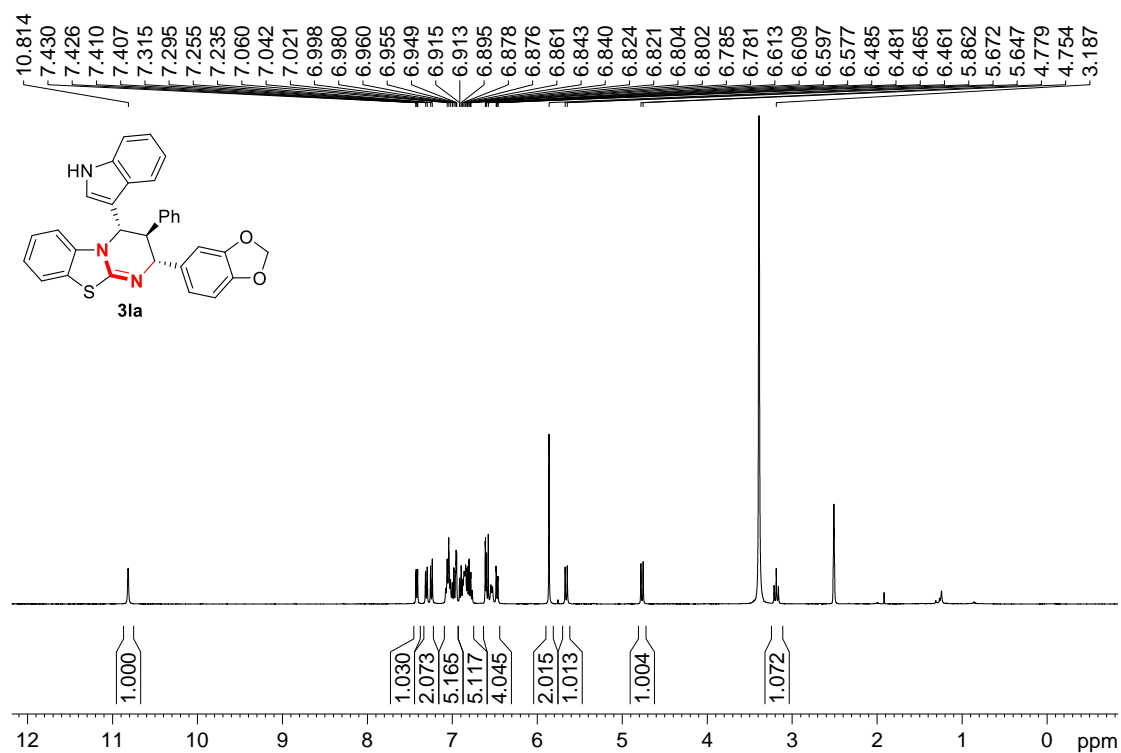

<sup>13</sup>C NMR spectrum of compound **3la** ((CD<sub>3</sub>)<sub>2</sub>SO, 100 MHz)

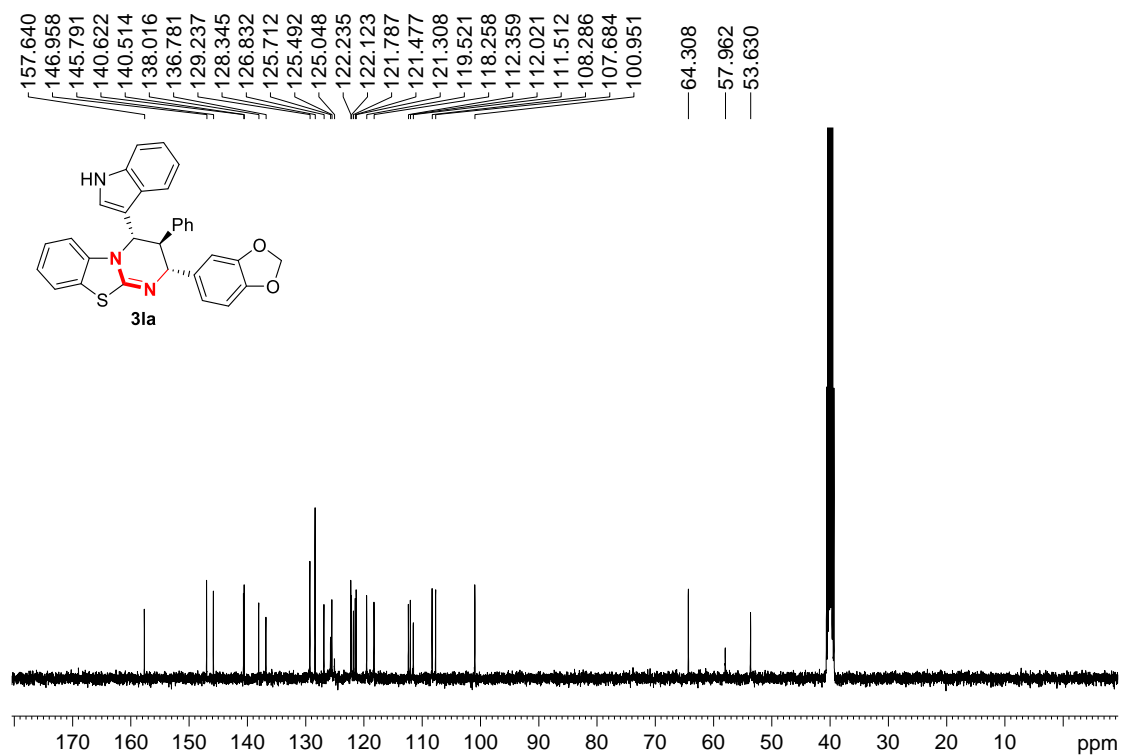

<sup>1</sup>H NMR spectrum of compound **3ma** ((CD<sub>3</sub>)<sub>2</sub>SO, 400 MHz)

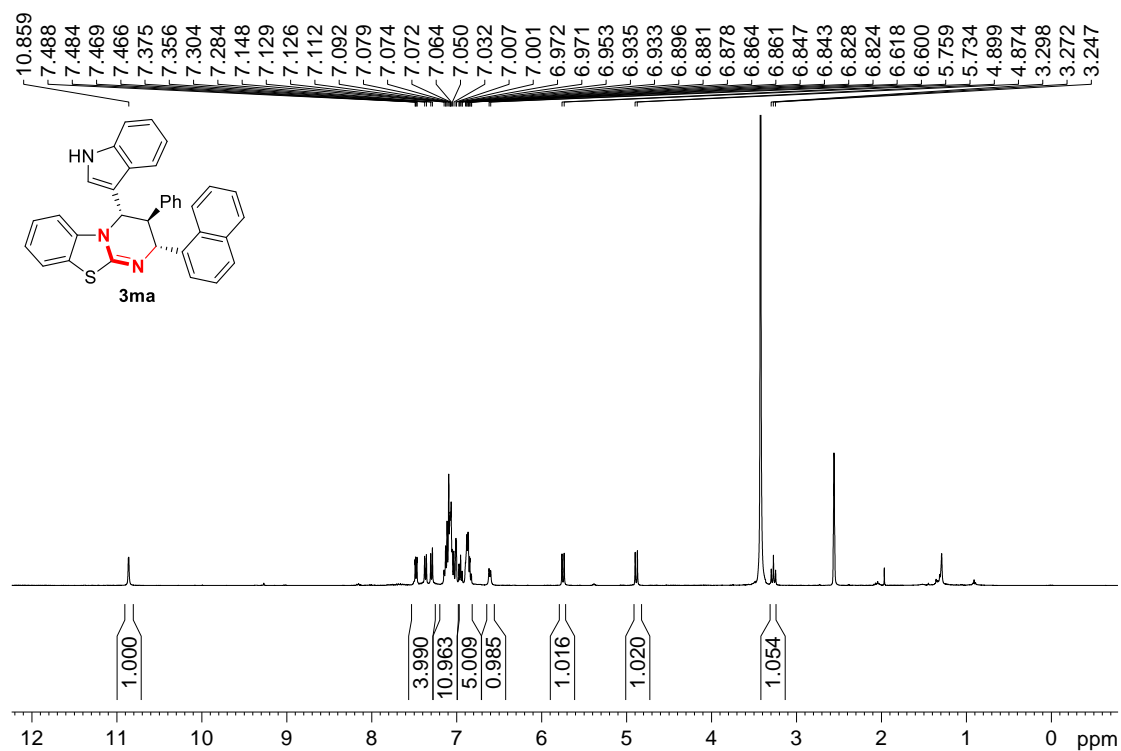

<sup>13</sup>C NMR spectrum of compound **3ma** ((CD<sub>3</sub>)<sub>2</sub>SO, 100 MHz)

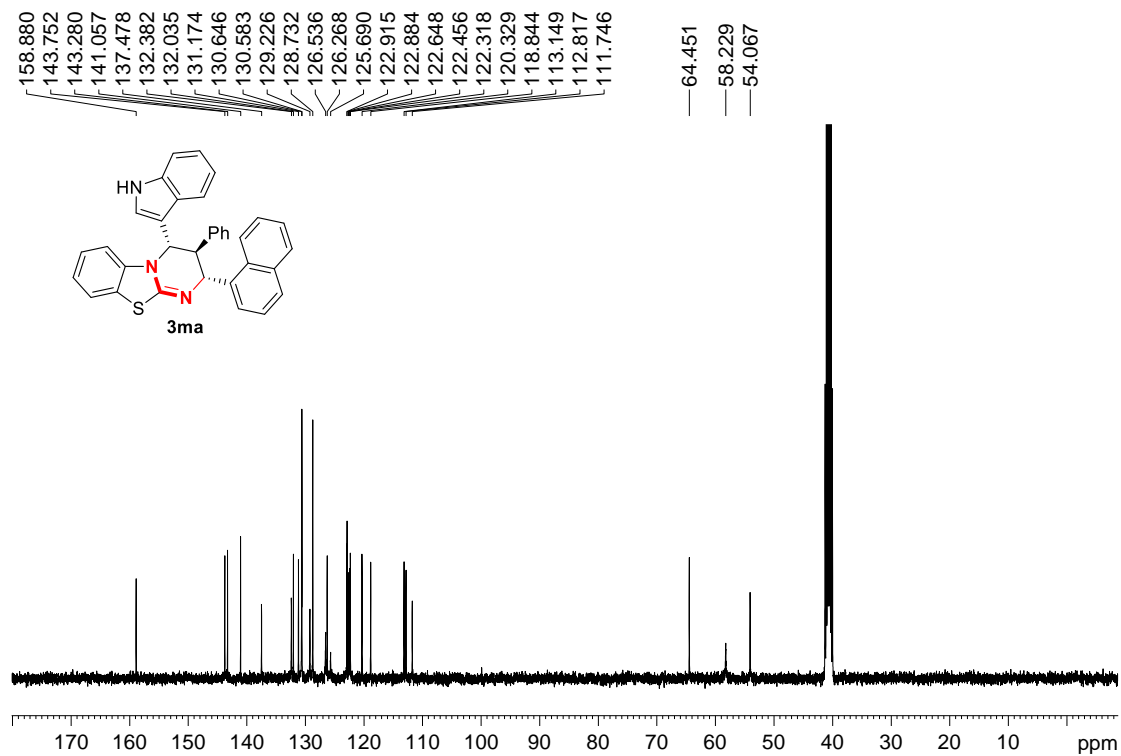

$^1\text{H}$  NMR spectrum of compound **3na** ( $(\text{CD}_3)_2\text{SO}$ , 400 MHz)

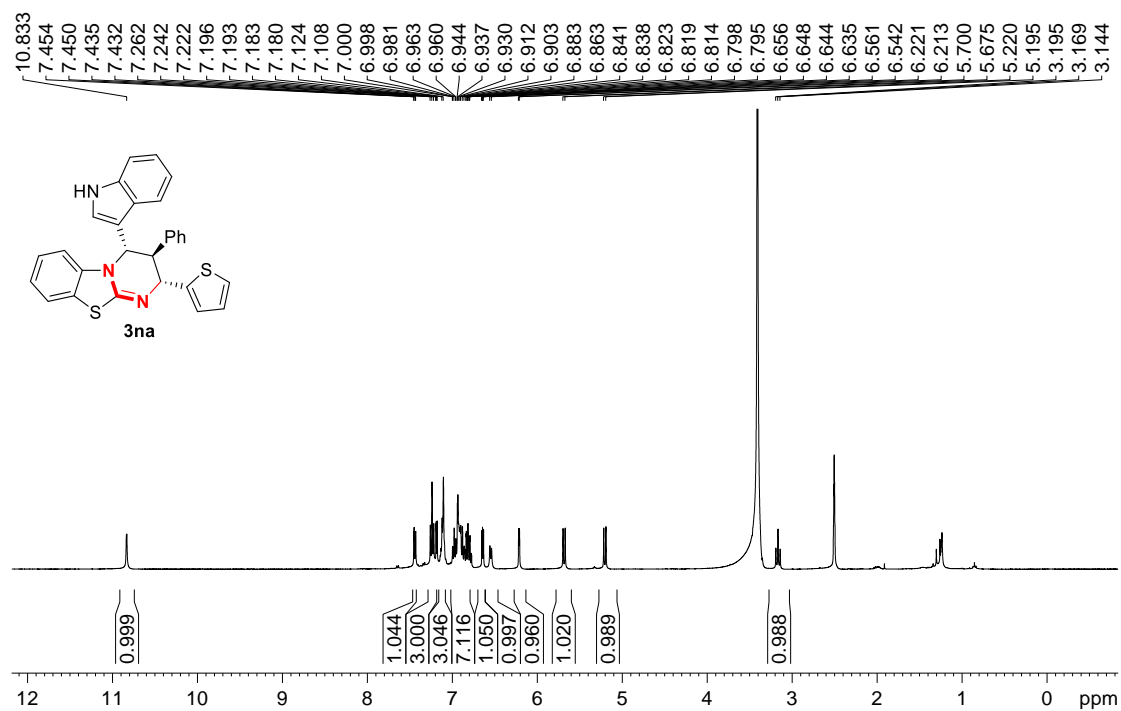

$^{13}\text{C}$  NMR spectrum of compound **3na** ( $(\text{CD}_3)_2\text{SO}$ , 100 MHz)

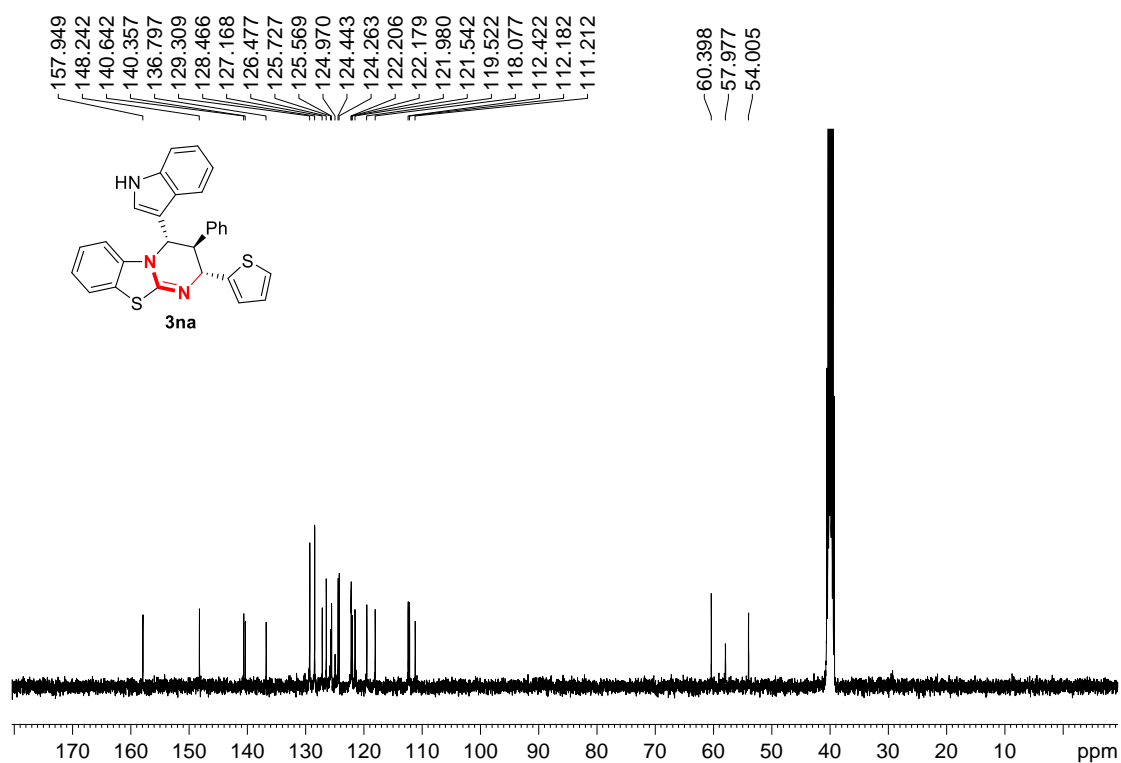

$^1\text{H}$  NMR spectrum of compound **3oa** ( $(\text{CD}_3)_2\text{SO}$ , 400 MHz)

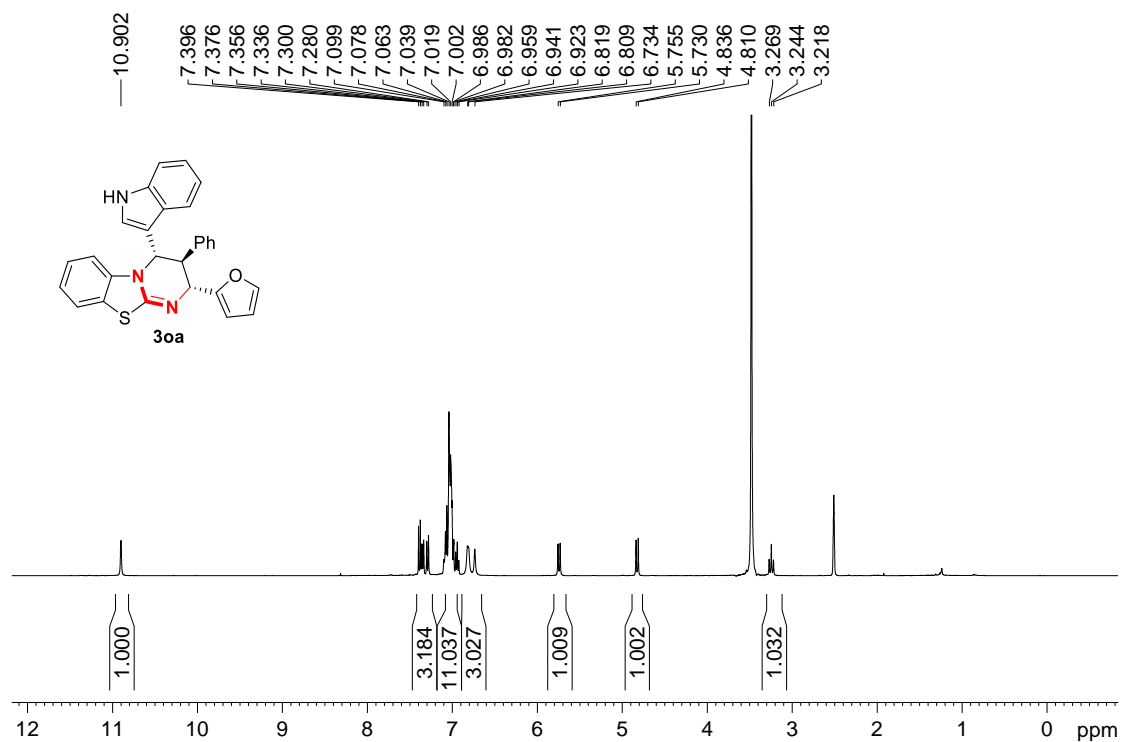

$^{13}\text{C}$  NMR spectrum of compound **3oa** ( $(\text{CD}_3)_2\text{SO}$ , 100 MHz)

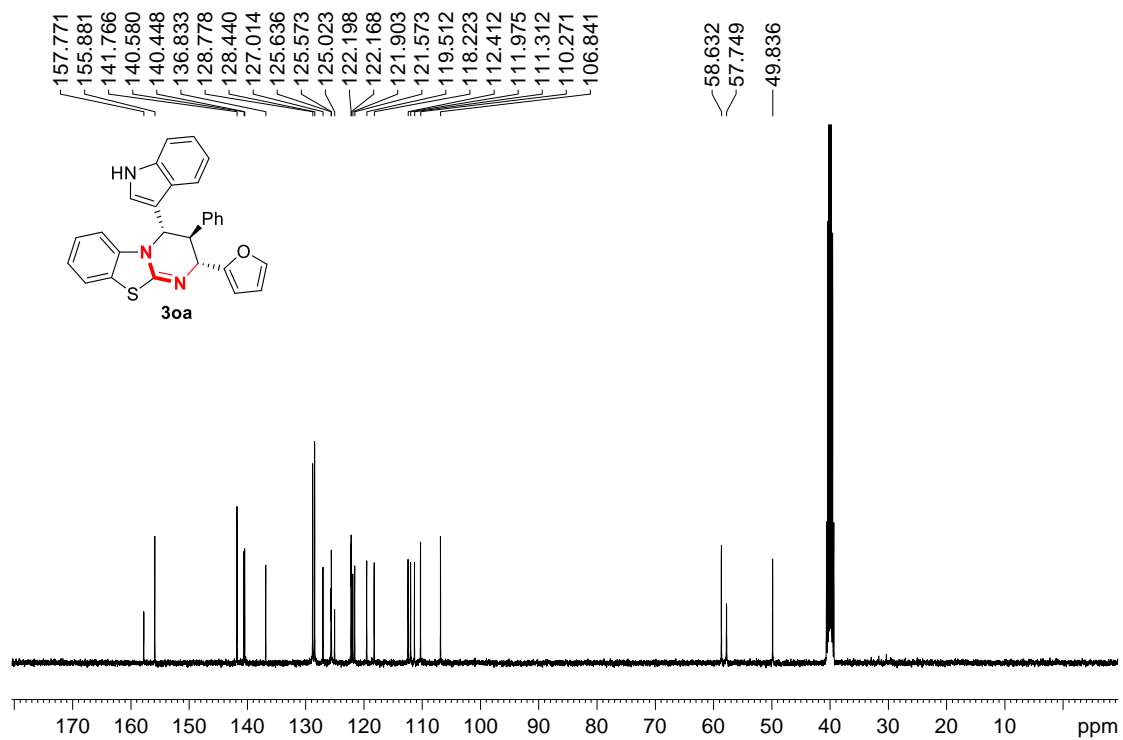

<sup>1</sup>H NMR spectrum of compound **3pa** ((CD<sub>3</sub>)<sub>2</sub>SO, 400 MHz)

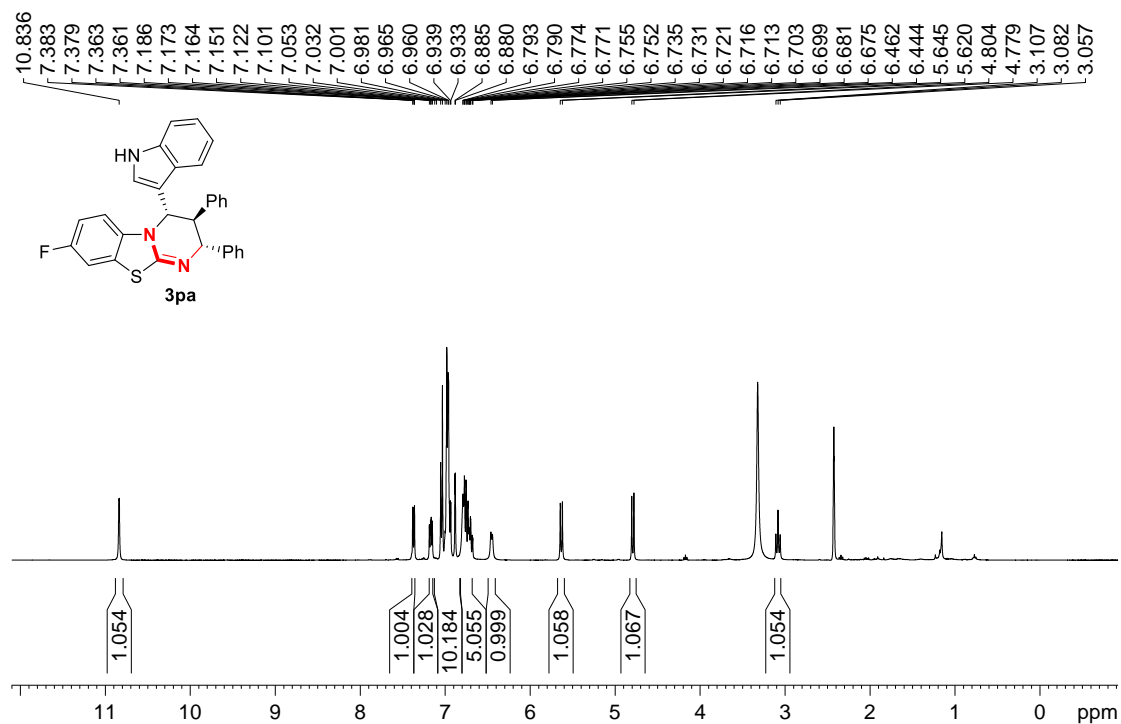

<sup>13</sup>C NMR spectrum of compound **3pa** ((CD<sub>3</sub>)<sub>2</sub>SO, 100 MHz)

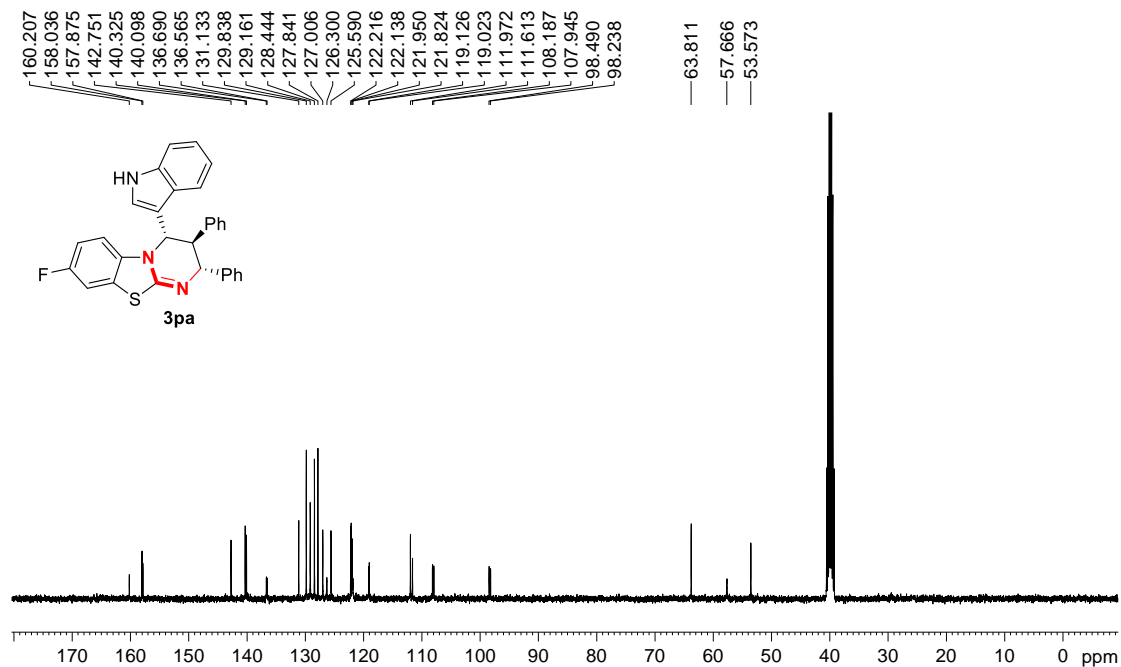

$^{19}\text{F}$  NMR spectrum of compound **3pa** ( $(\text{CD}_3)_2\text{SO}$ , 376 MHz)

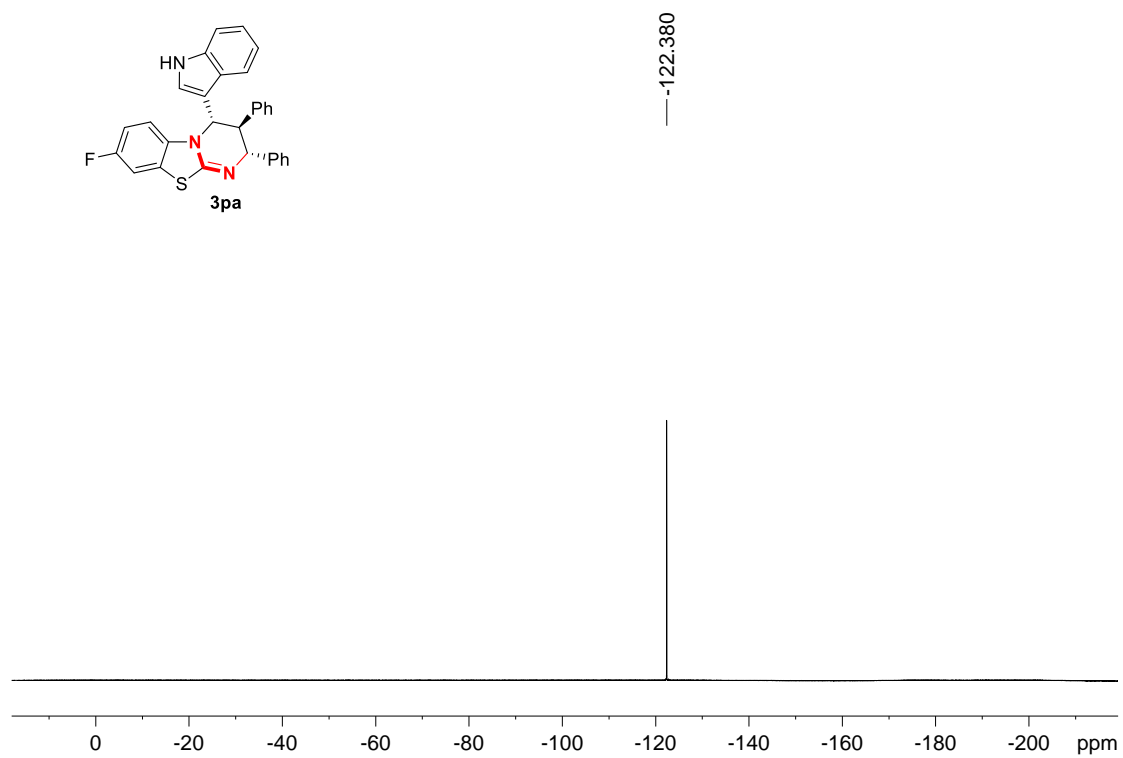

<sup>1</sup>H NMR spectrum of compound **3qa** ((CD<sub>3</sub>)<sub>2</sub>SO, 400 MHz)

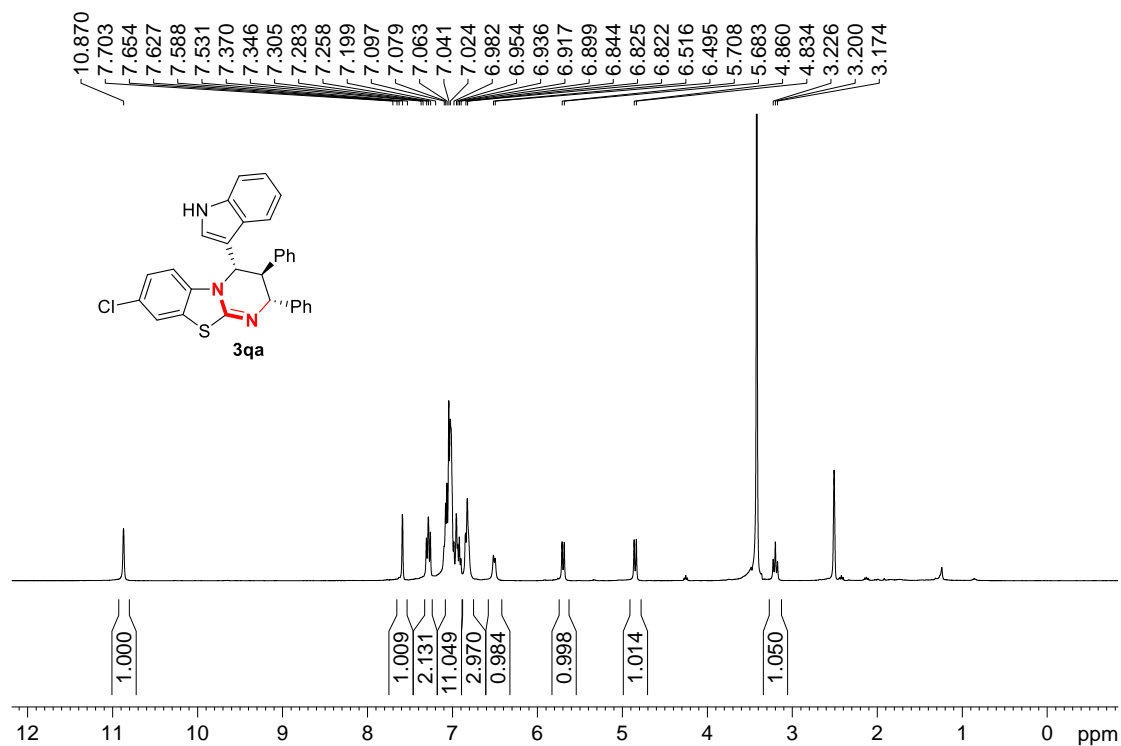

<sup>13</sup>C NMR spectrum of compound **3qa** ((CD<sub>3</sub>)<sub>2</sub>SO, 100 MHz)

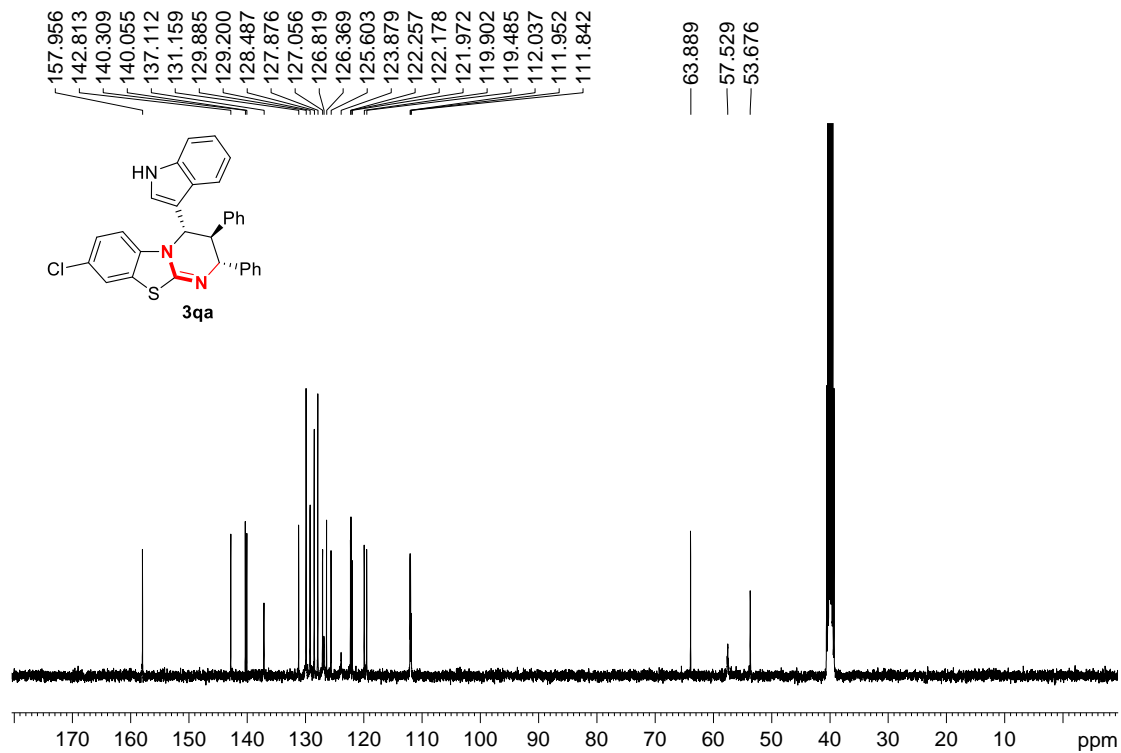



$^1\text{H}$  NMR spectrum of compound **3ra** ( $(\text{CD}_3)_2\text{SO}$ , 400 MHz)

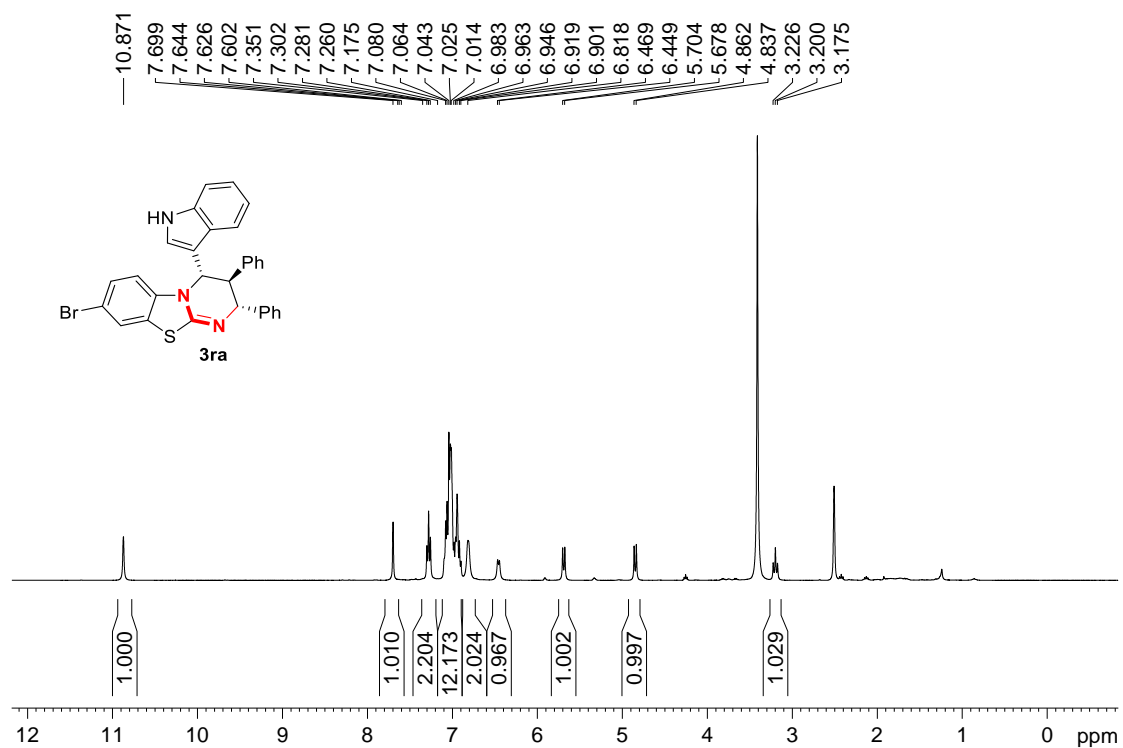

$^{13}\text{C}$  NMR spectrum of compound **3ra** ( $(\text{CD}_3)_2\text{SO}$ , 100 MHz)

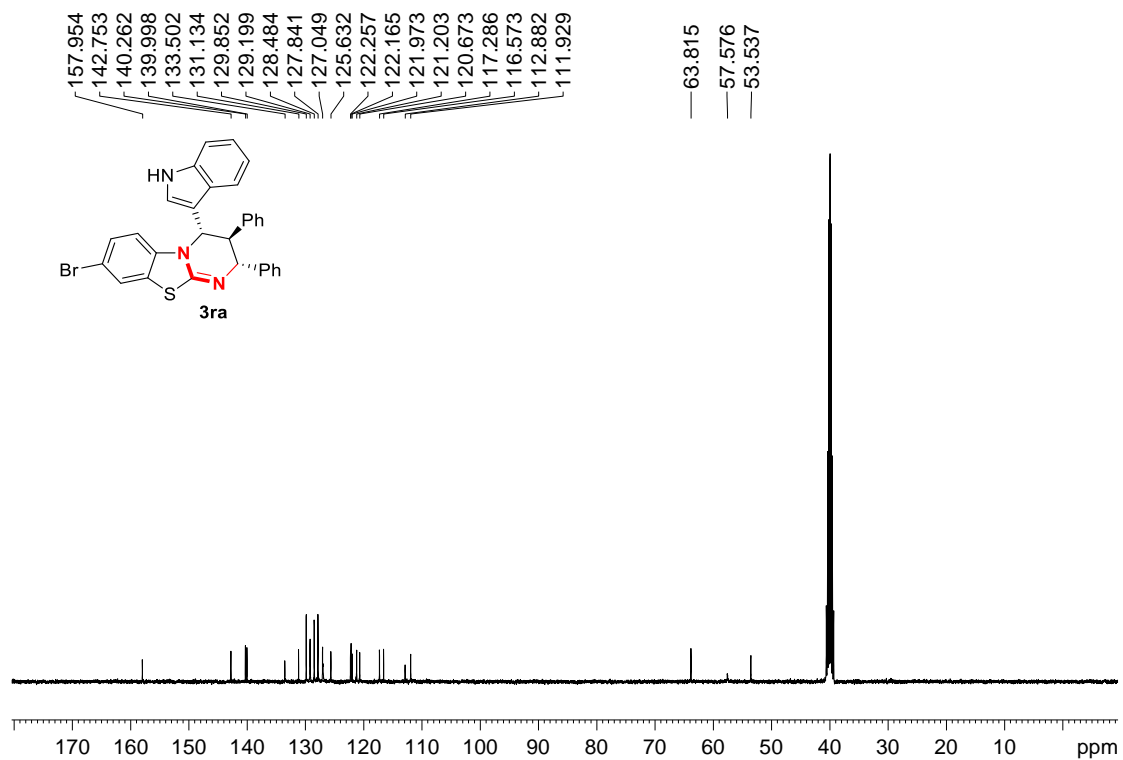

$^1\text{H}$  NMR spectrum of compound **3sa** ( $(\text{CD}_3)_2\text{SO}$ , 400 MHz)

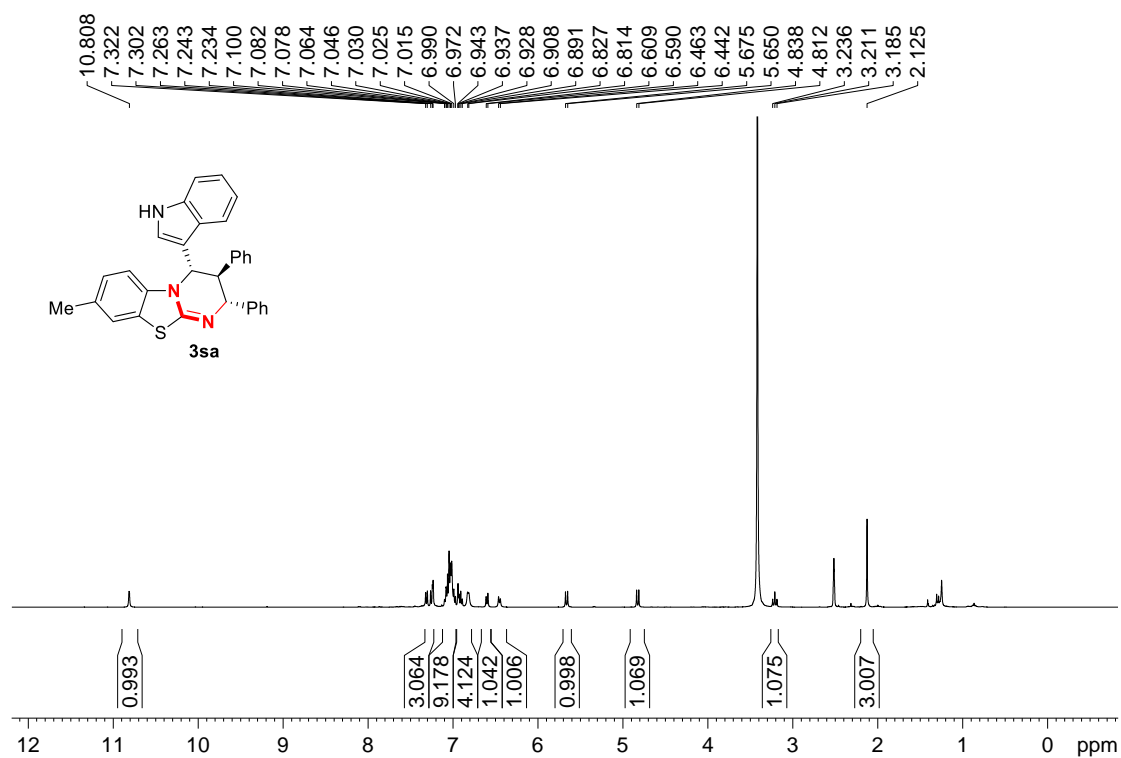

$^{13}\text{C}$  NMR spectrum of compound **3sa** ( $(\text{CD}_3)_2\text{SO}$ , 100 MHz)

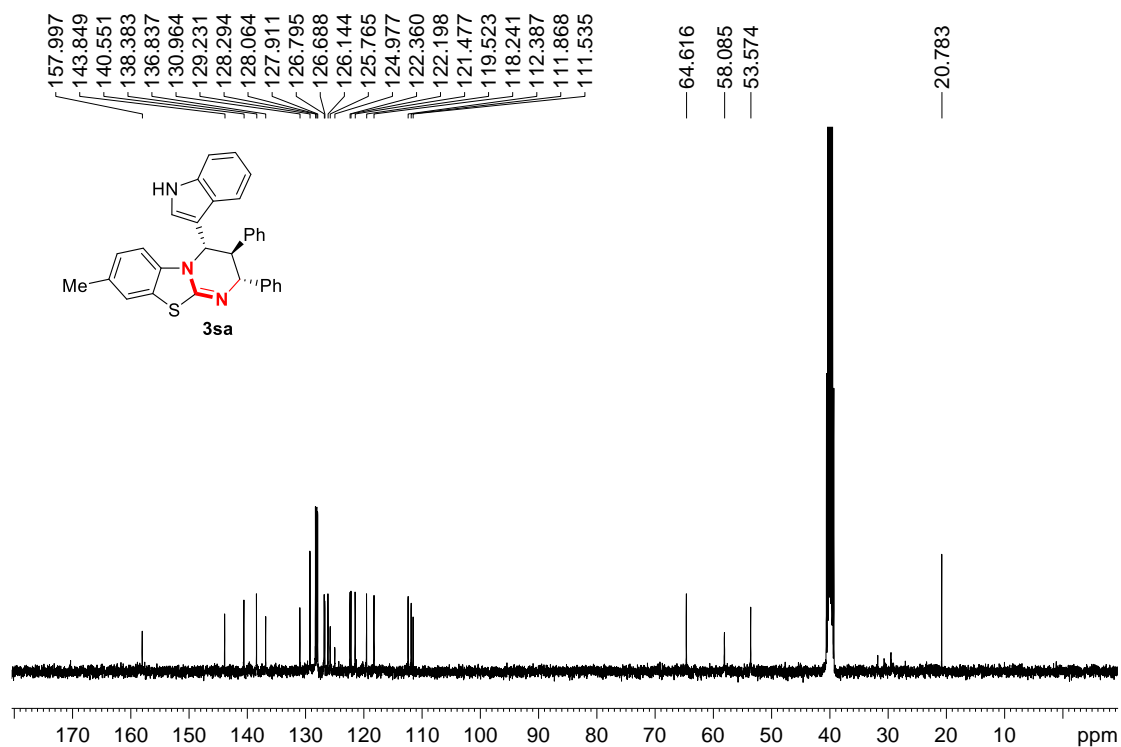

$^1\text{H}$  NMR spectrum of compound **3ta** ( $(\text{CD}_3)_2\text{SO}$ , 400 MHz)

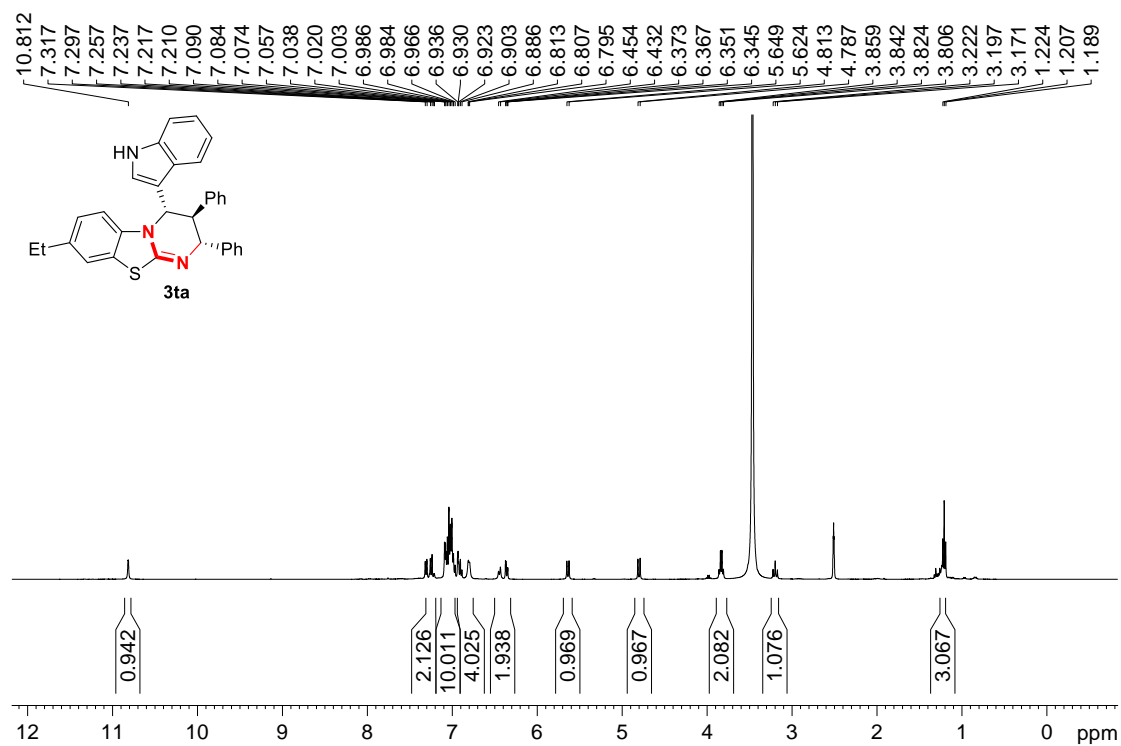

$^{13}\text{C}$  NMR spectrum of compound **3ta** ( $(\text{CD}_3)_2\text{SO}$ , 100 MHz)

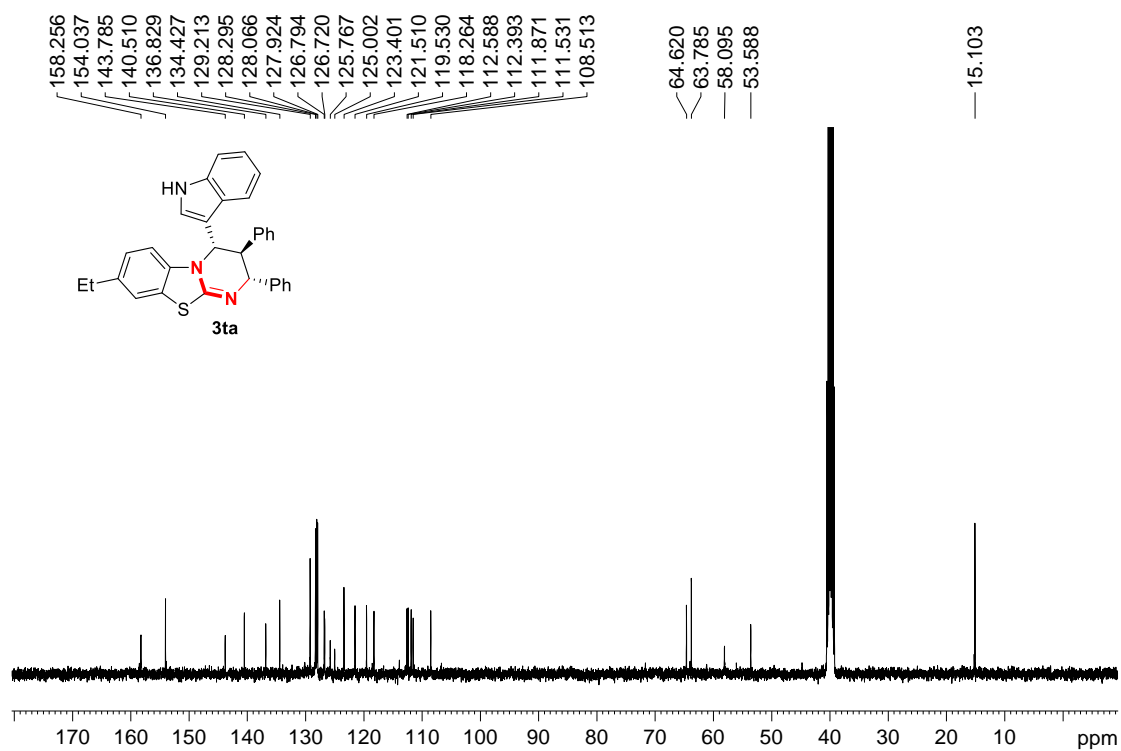

$^1\text{H}$  NMR spectrum of compound **3ua** ( $(\text{CD}_3)_2\text{SO}$ , 400 MHz)

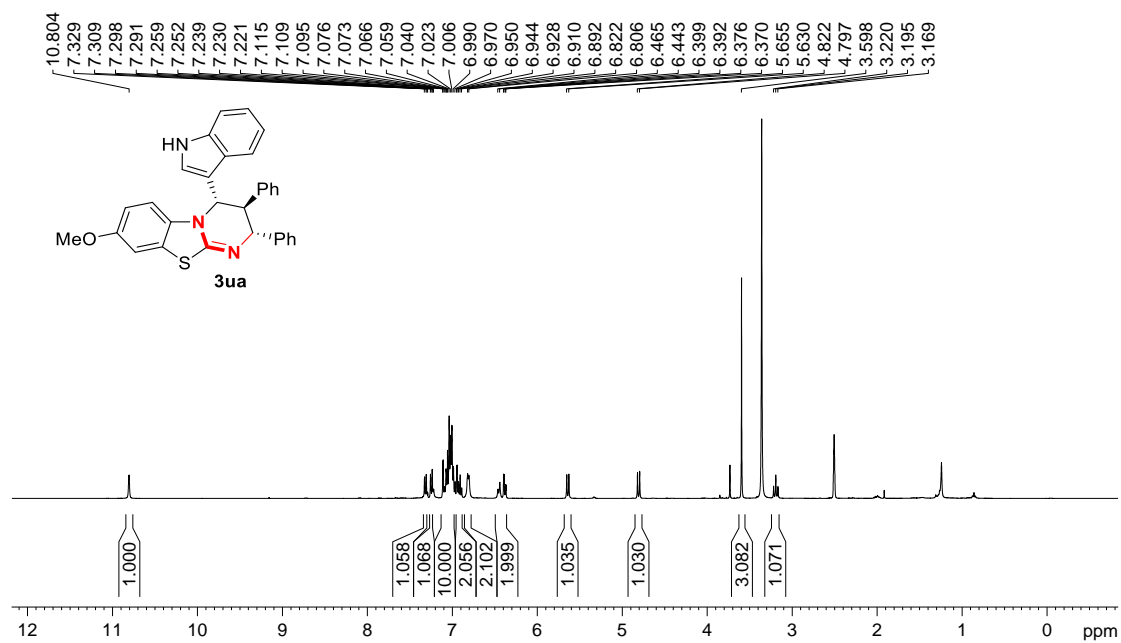

$^{13}\text{C}$  NMR spectrum of compound **3ua** ( $(\text{CD}_3)_2\text{SO}$ , 100 MHz)

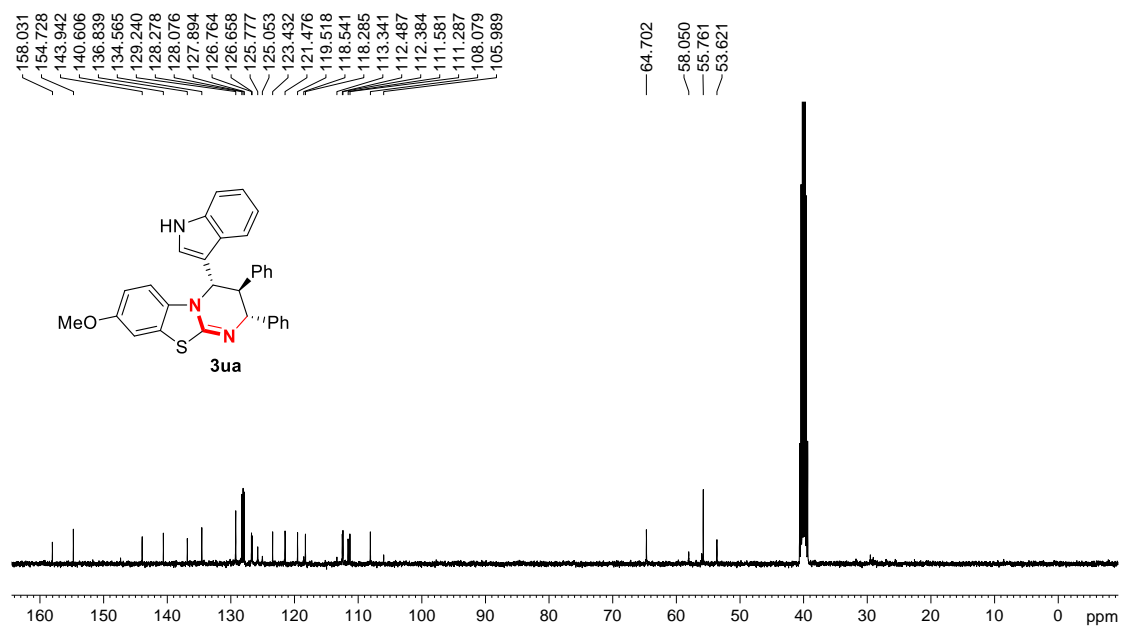

<sup>1</sup>H NMR spectrum of compound **3va** ((CD<sub>3</sub>)<sub>2</sub>SO, 400 MHz)

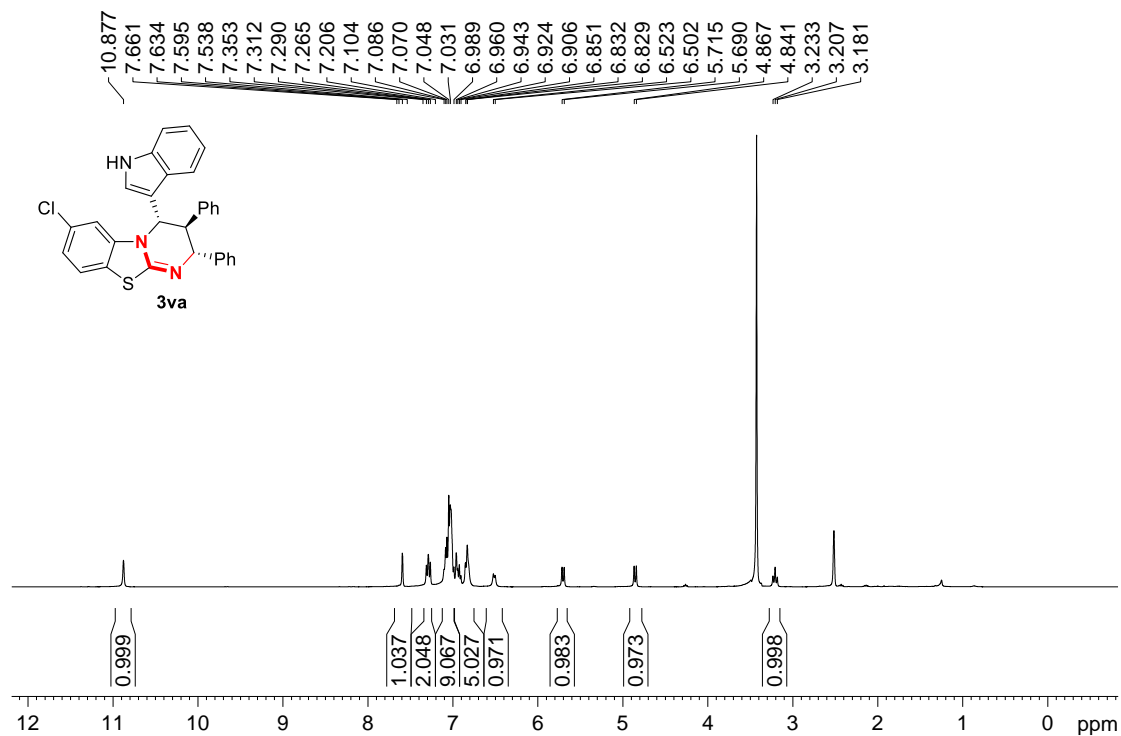

<sup>13</sup>C NMR spectrum of compound **3va** ((CD<sub>3</sub>)<sub>2</sub>SO, 100 MHz)

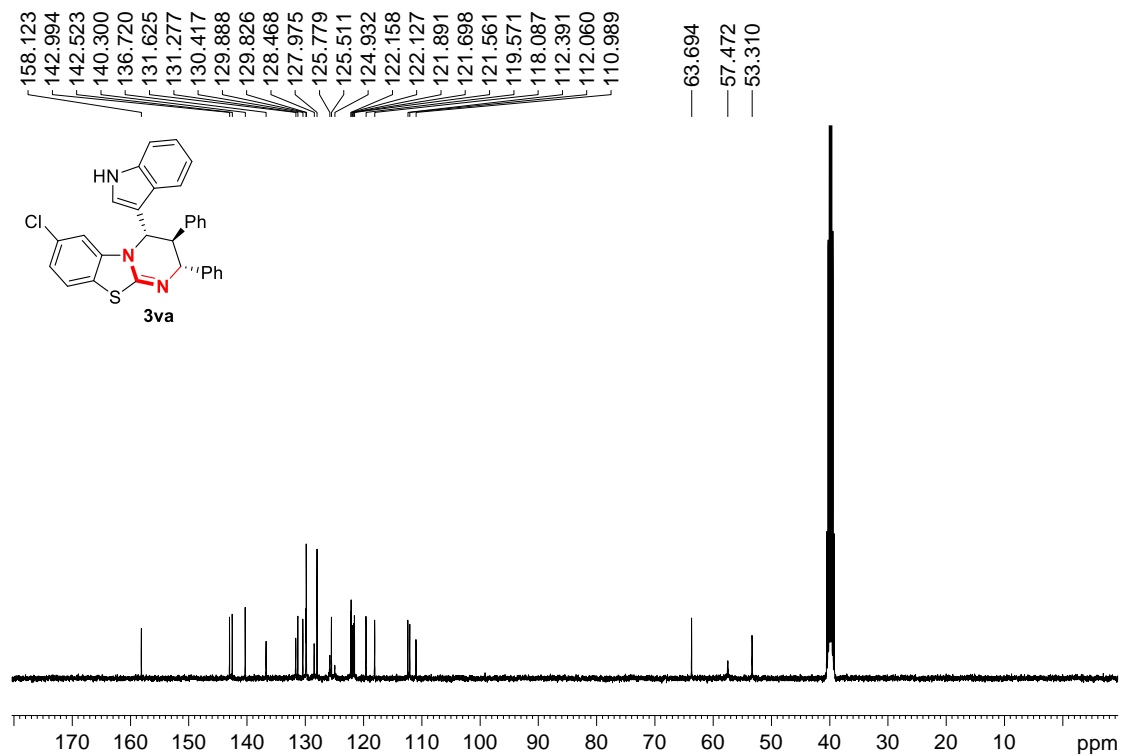

<sup>1</sup>H NMR spectrum of compound **3wa** ((CD<sub>3</sub>)<sub>2</sub>SO, 400 MHz)

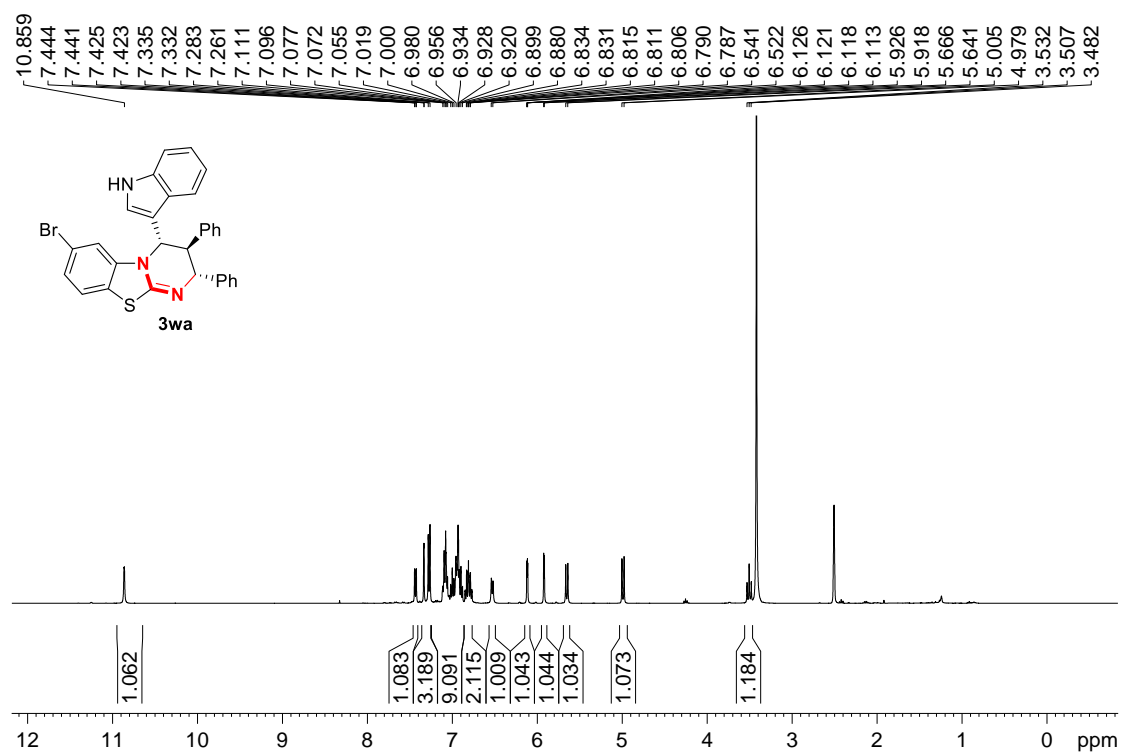

<sup>13</sup>C NMR spectrum of compound **3wa** ((CD<sub>3</sub>)<sub>2</sub>SO, 100 MHz)

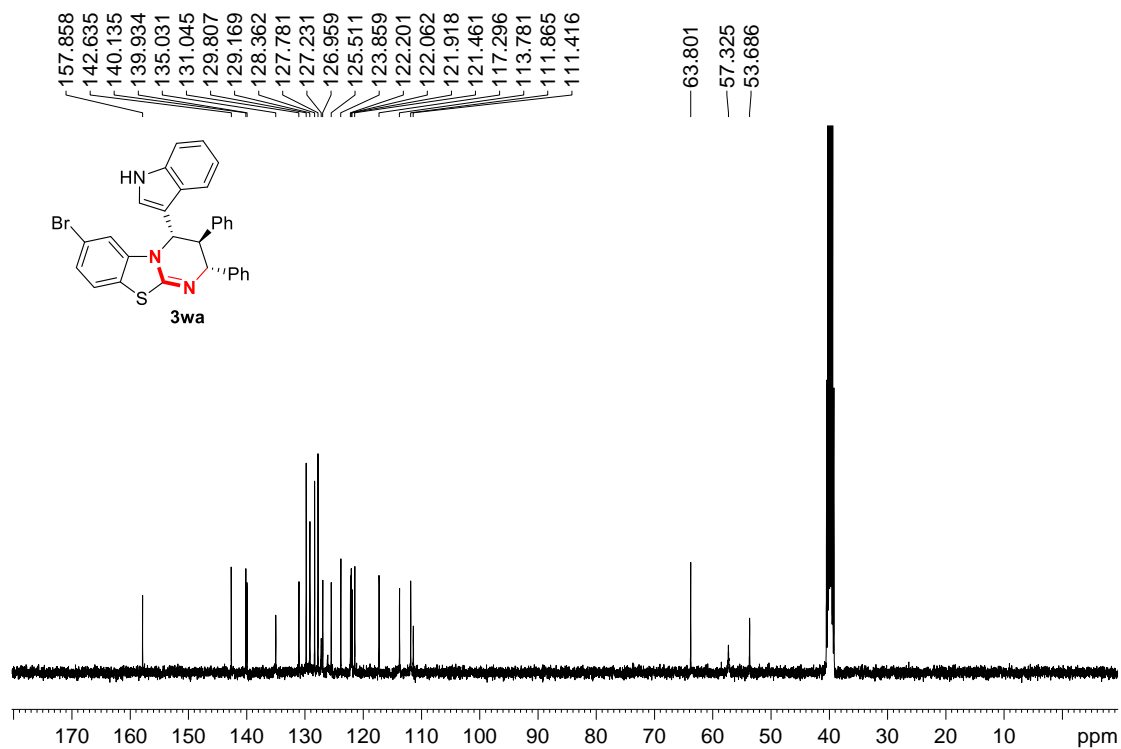

$^1\text{H}$  NMR spectrum of compound **3xa** ( $(\text{CD}_3)_2\text{SO}$ , 400 MHz)

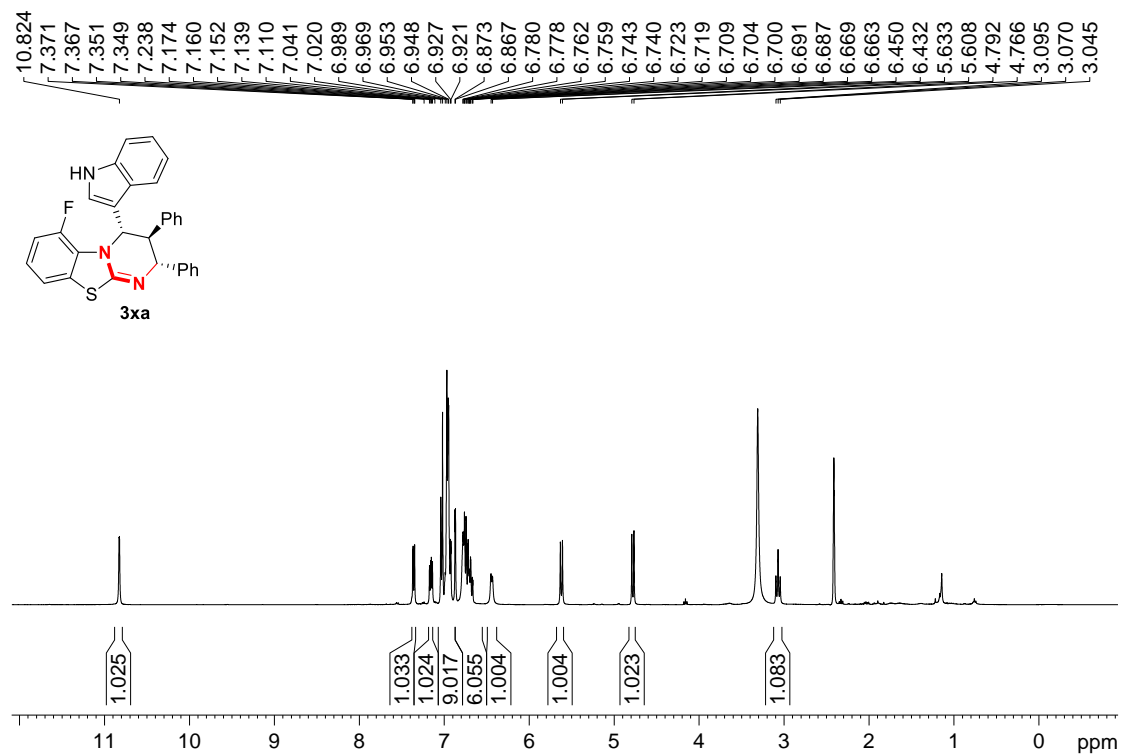

$^{13}\text{C}$  NMR spectrum of compound **3xa** ( $(\text{CD}_3)_2\text{SO}$ , 100 MHz)

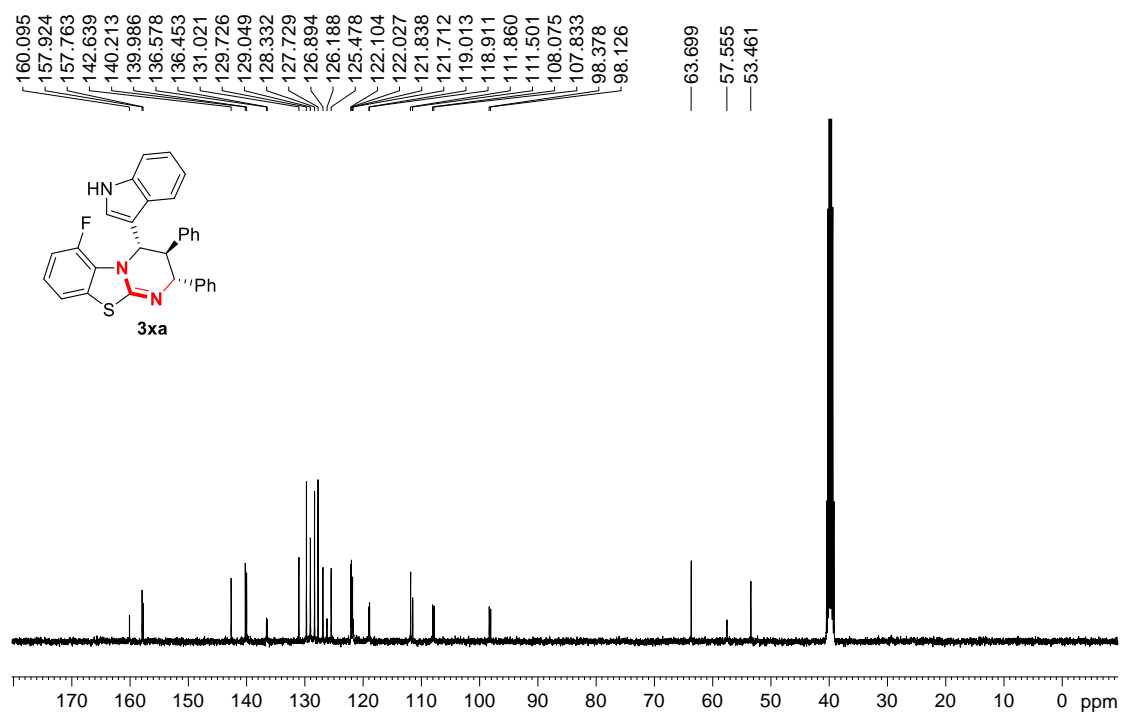

$^{19}\text{F}$  NMR spectrum of compound **3xa** ( $(\text{CD}_3)_2\text{SO}$ , 376 MHz)

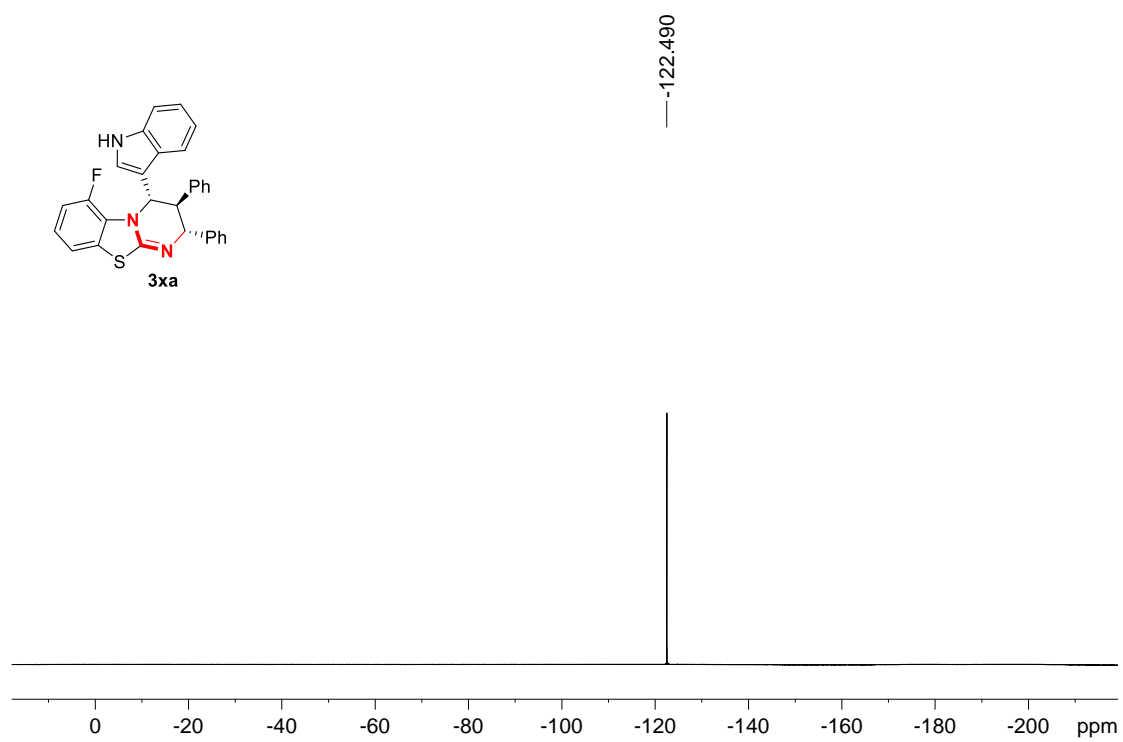



$^1\text{H}$  NMR spectrum of compound **3cb** ( $(\text{CD}_3)_2\text{SO}$ , 400 MHz)

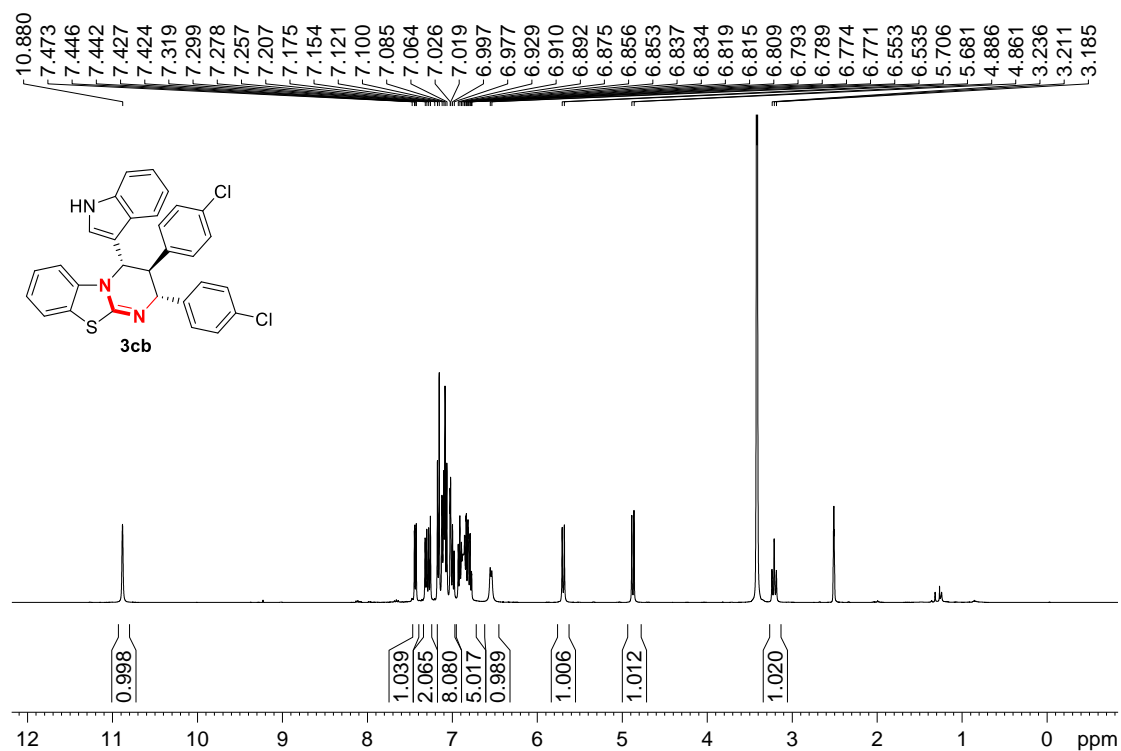

$^{13}\text{C}$  NMR spectrum of compound **3cb** ( $(\text{CD}_3)_2\text{SO}$ , 100 MHz)

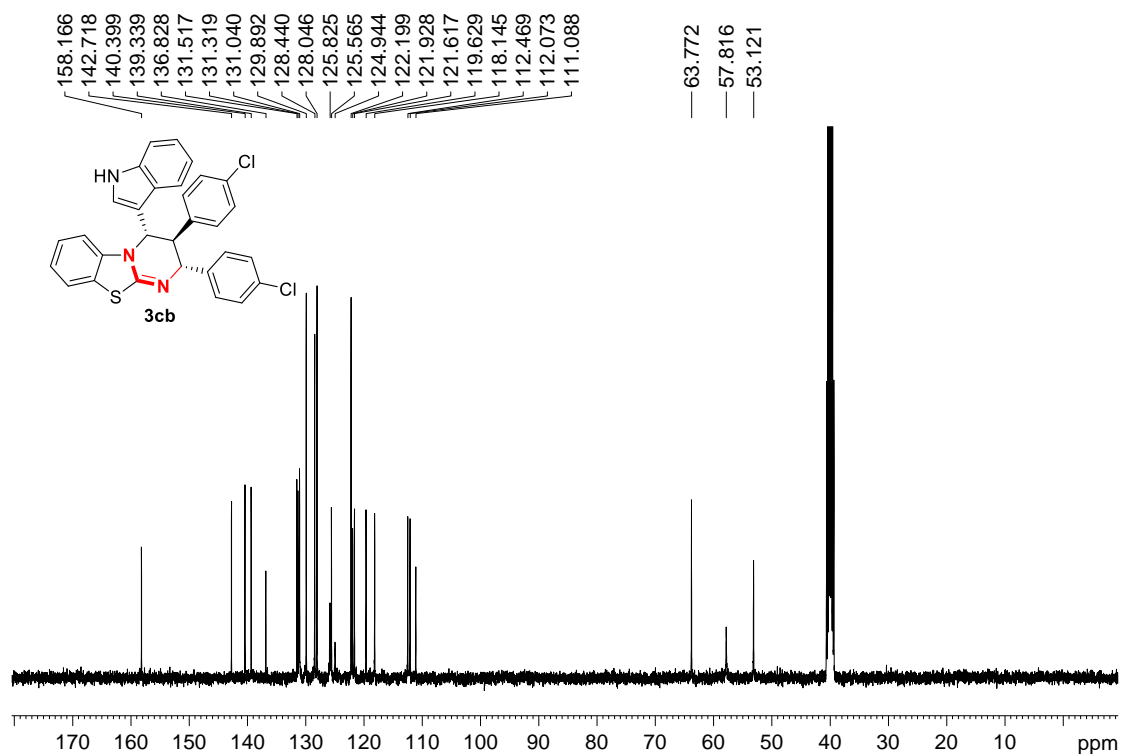

$^1\text{H}$  NMR spectrum of compound **3cc** ( $(\text{CD}_3)_2\text{SO}$ , 400 MHz)

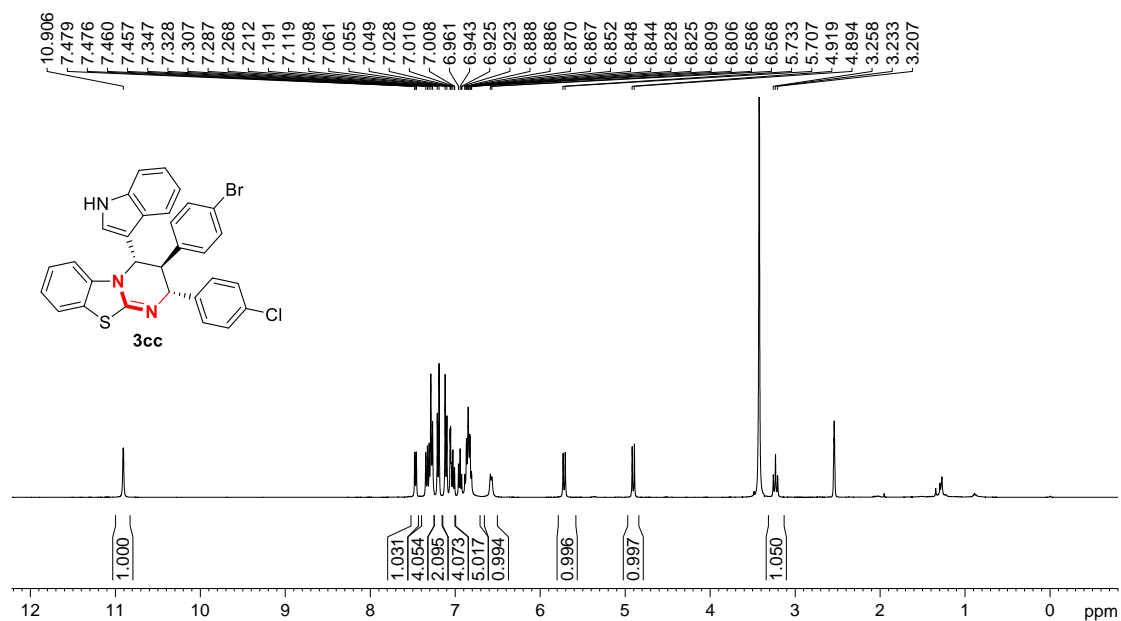

$^{13}\text{C}$  NMR spectrum of compound **3cc** ( $(\text{CD}_3)_2\text{SO}$ , 100 MHz)

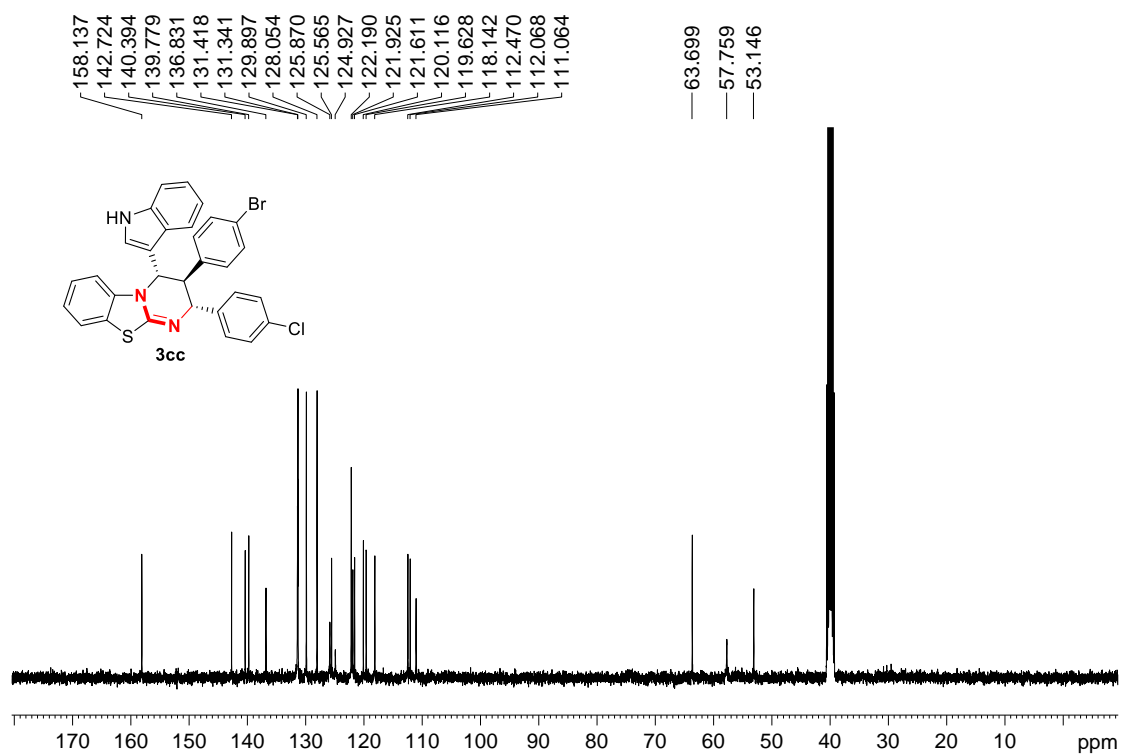

<sup>1</sup>H NMR spectrum of compound **3cd** ((CD<sub>3</sub>)<sub>2</sub>SO, 400 MHz)

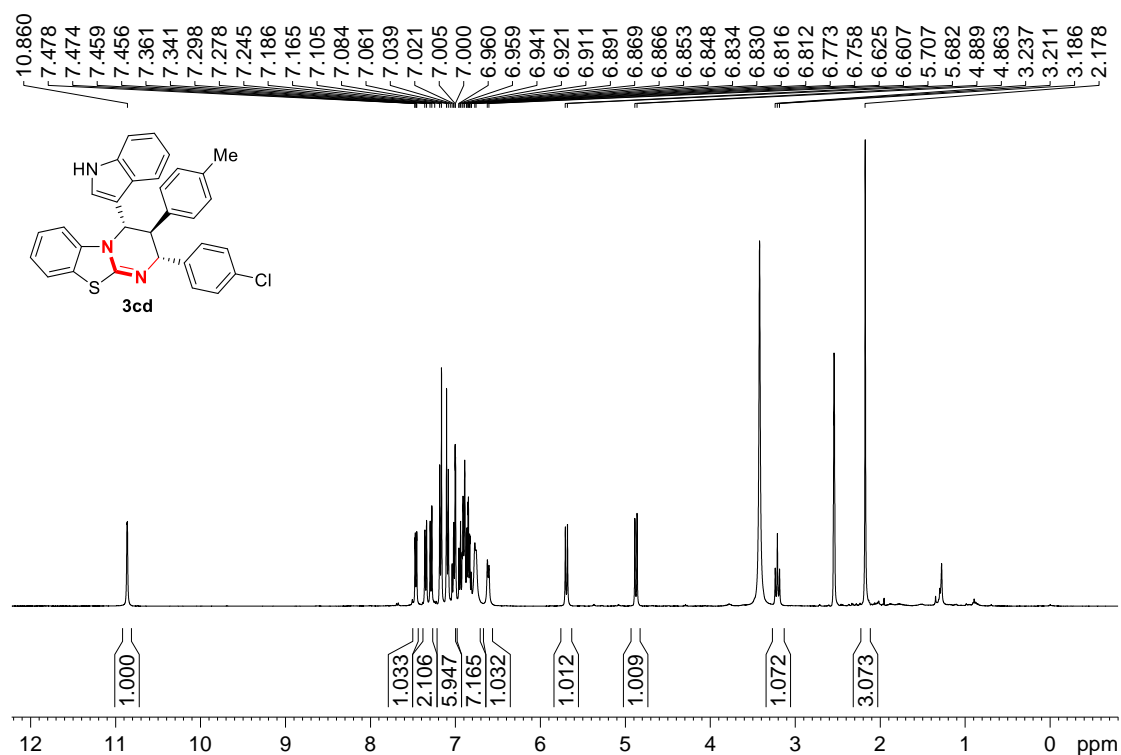

<sup>13</sup>C NMR spectrum of compound **3cd** ((CD<sub>3</sub>)<sub>2</sub>SO, 100 MHz)

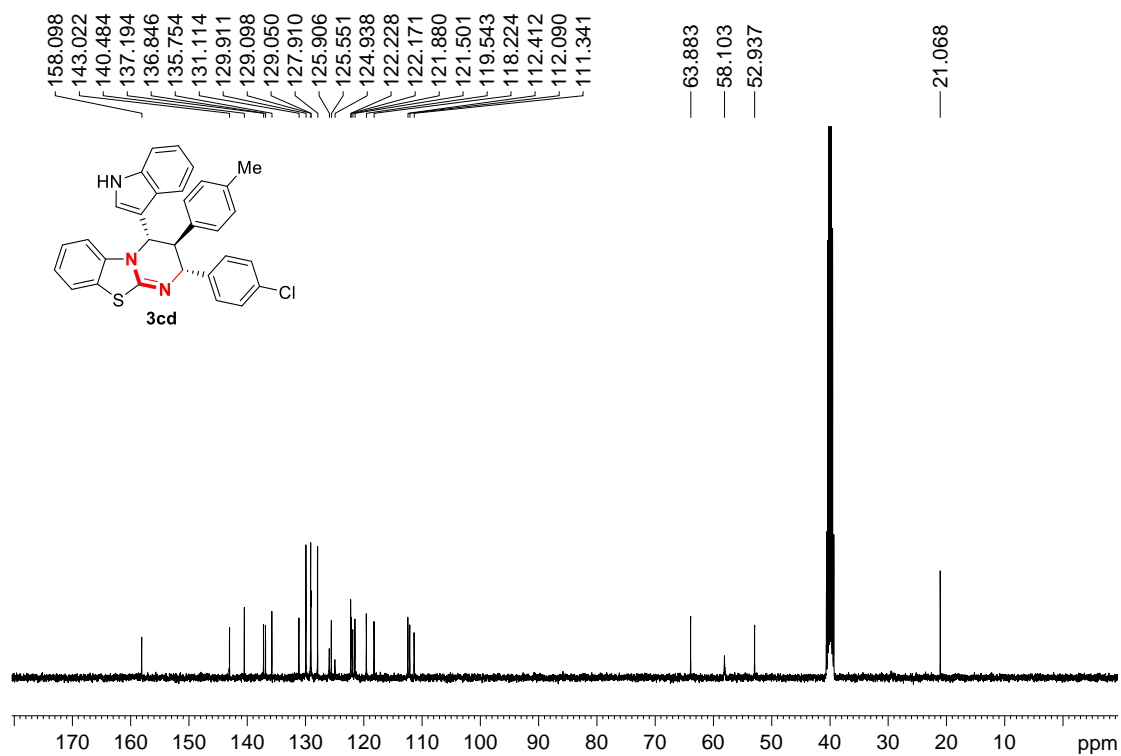

<sup>1</sup>H NMR spectrum of compound **3ce** ((CD<sub>3</sub>)<sub>2</sub>SO, 400 MHz)

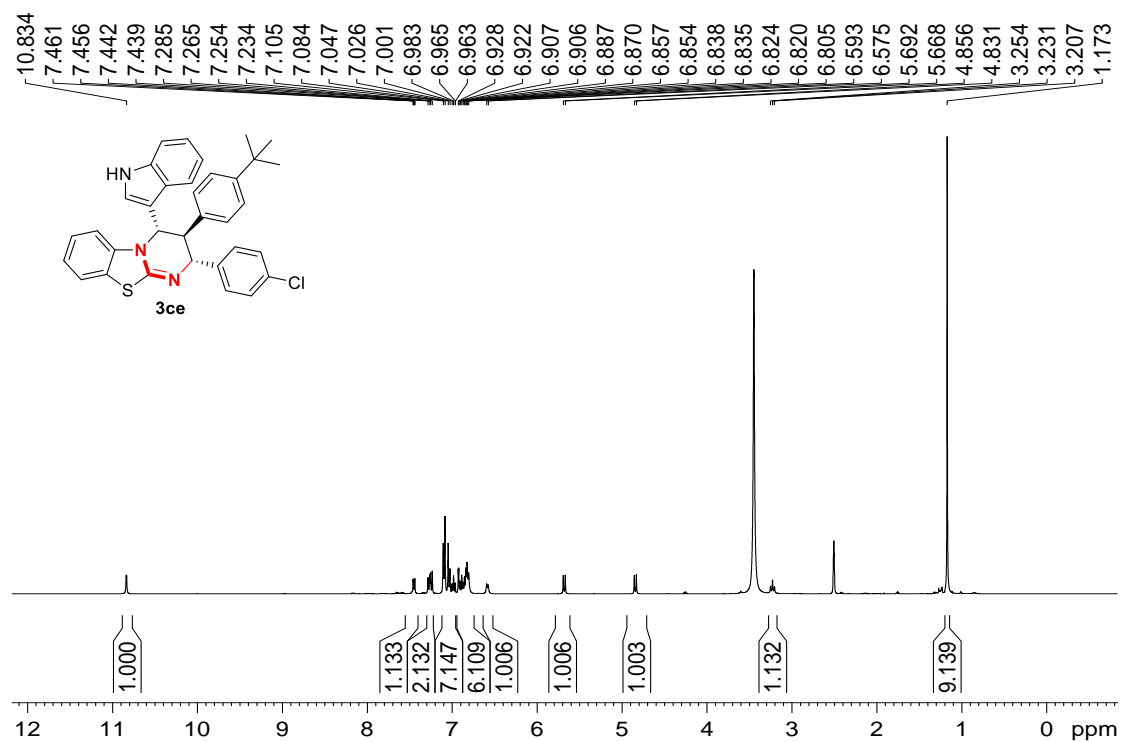

<sup>13</sup>C NMR spectrum of compound **3ce** ((CD<sub>3</sub>)<sub>2</sub>SO, 100 MHz)

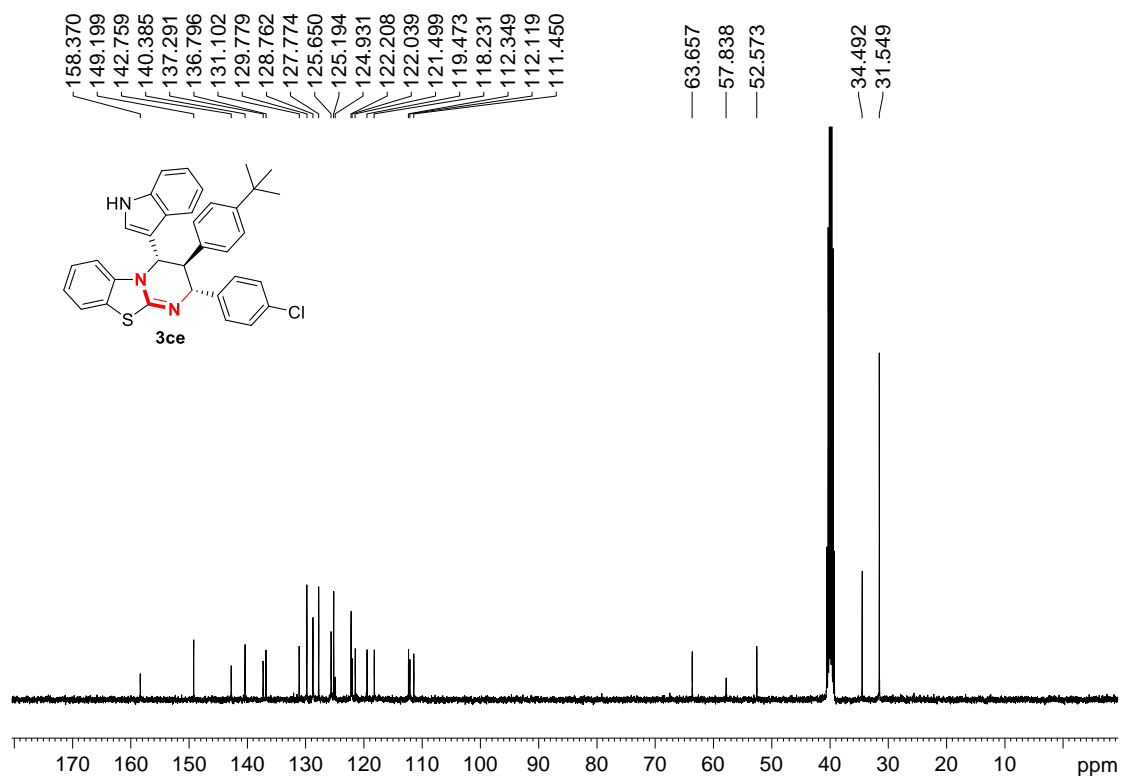

$^1\text{H}$  NMR spectrum of compound **3cf** ( $(\text{CD}_3)_2\text{SO}$ , 400 MHz)

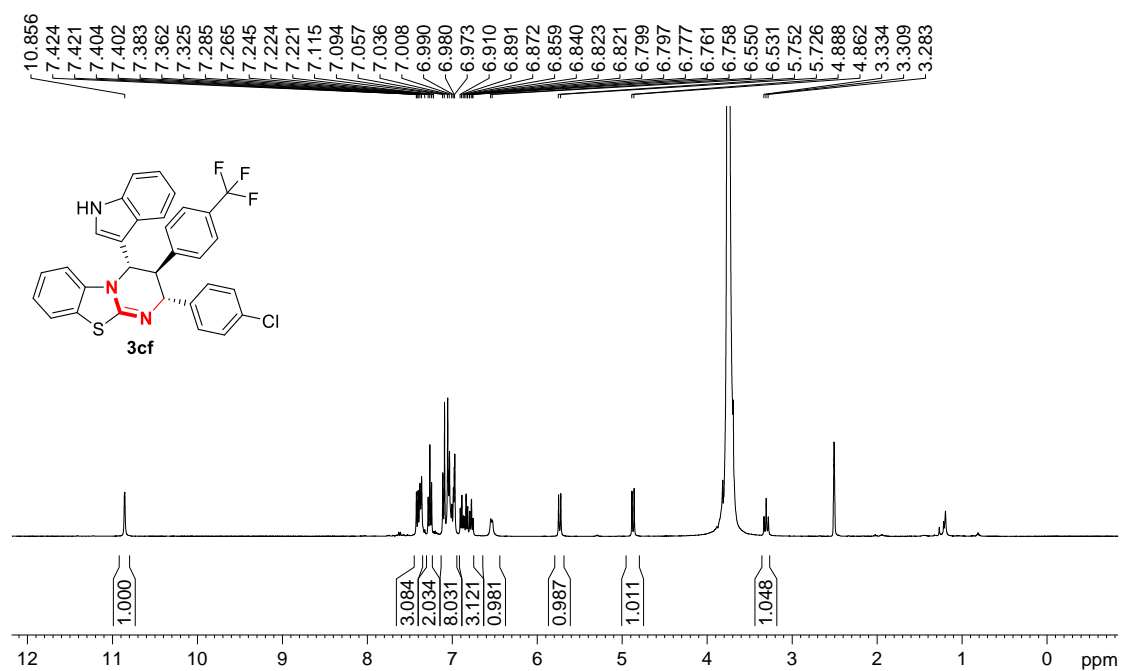

$^{13}\text{C}$  NMR spectrum of compound **3cf** ( $(\text{CD}_3)_2\text{SO}$ , 100 MHz)

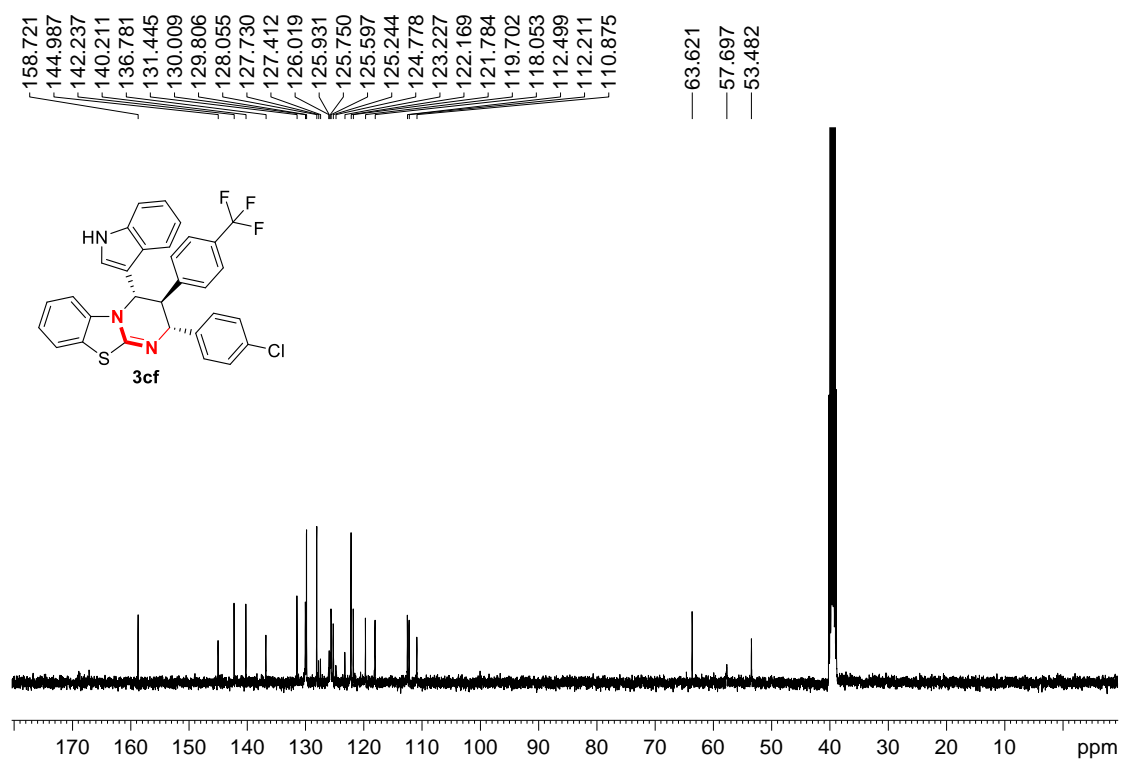

$^{19}\text{F}$  NMR spectrum of compound **3cf** ( $(\text{CD}_3)_2\text{SO}$ , 376 MHz)

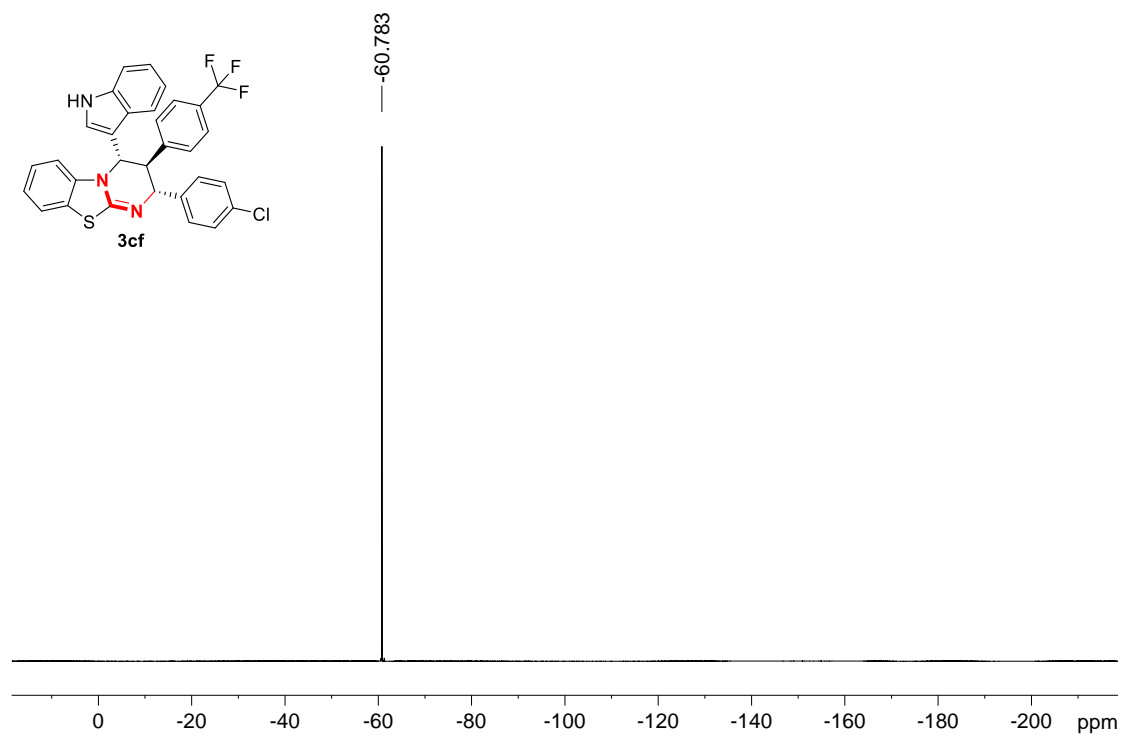

$^1\text{H}$  NMR spectrum of compound **3cg** ( $(\text{CD}_3)_2\text{SO}$ , 400 MHz)

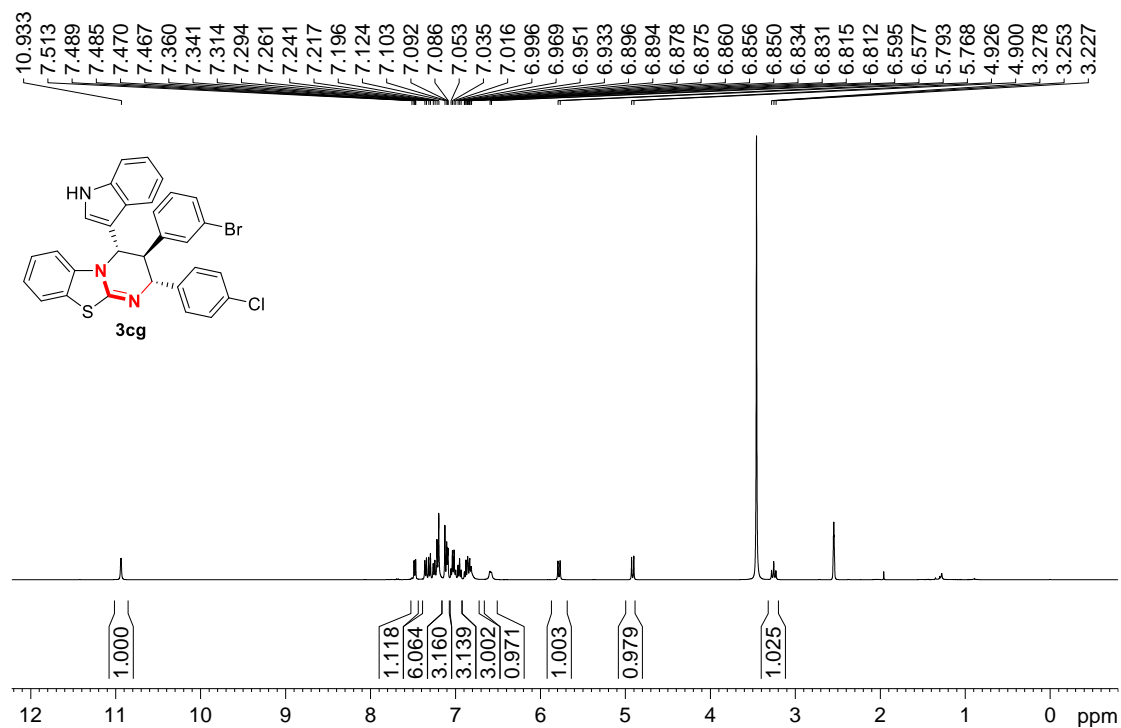

$^{13}\text{C}$  NMR spectrum of compound **3cg** ( $(\text{CD}_3)_2\text{SO}$ , 100 MHz)

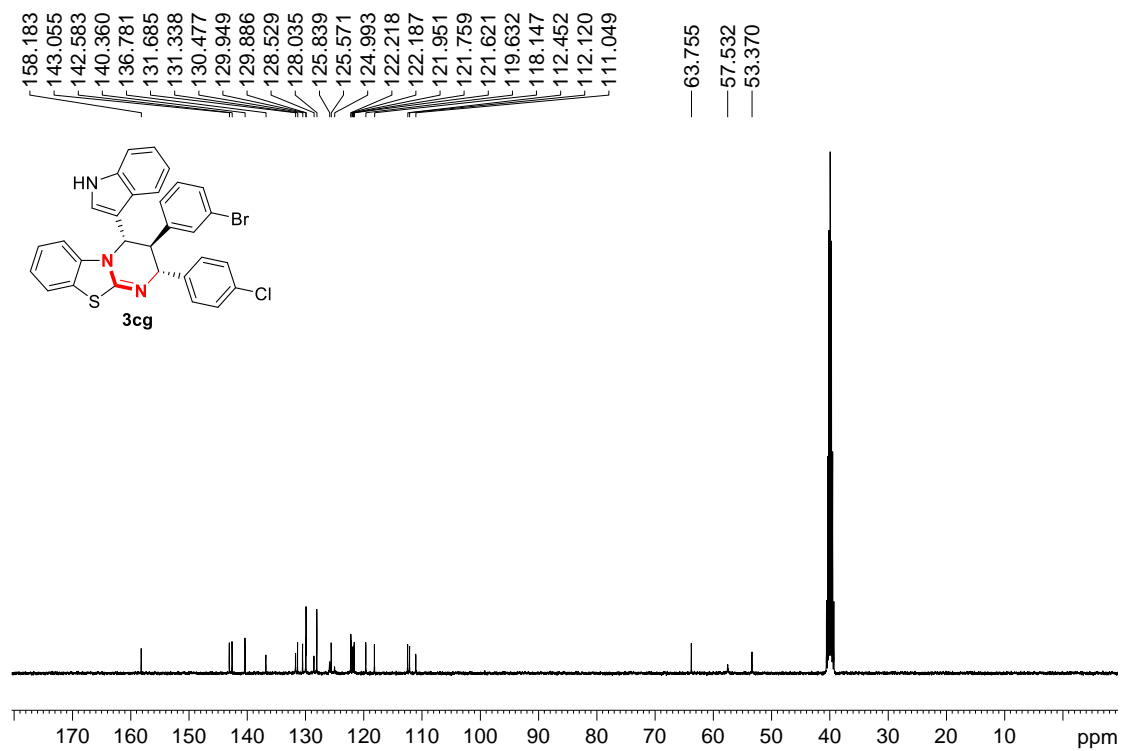

<sup>1</sup>H NMR spectrum of compound **3ch** ((CD<sub>3</sub>)<sub>2</sub>SO, 400 MHz)

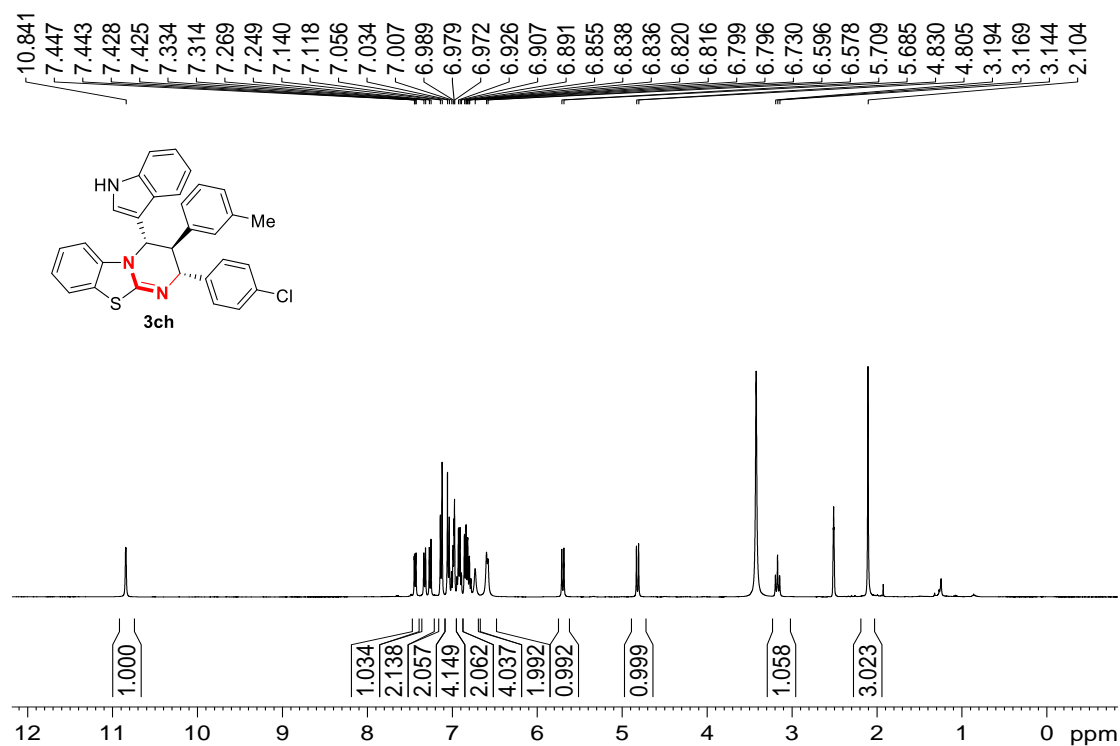

<sup>13</sup>C NMR spectrum of compound **3ch** ((CD<sub>3</sub>)<sub>2</sub>SO, 100 MHz)

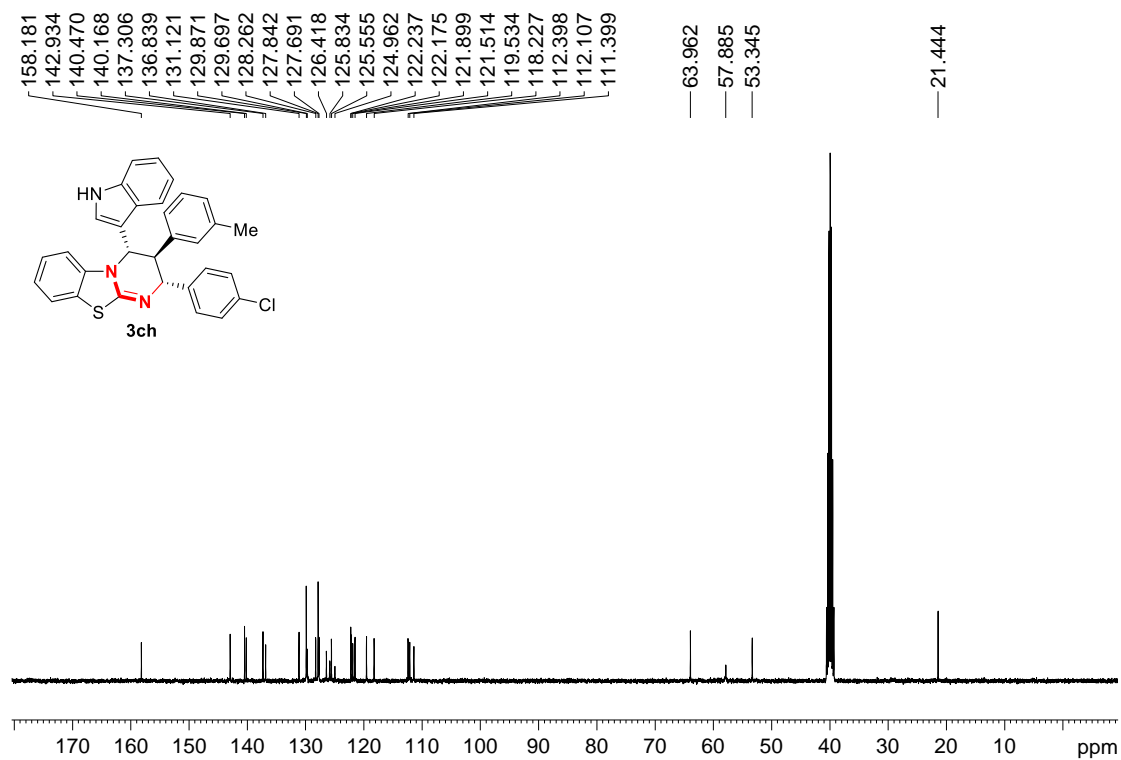



$^1\text{H}$  NMR spectrum of compound **3ci** ( $(\text{CD}_3)_2\text{SO}$ , 400 MHz)

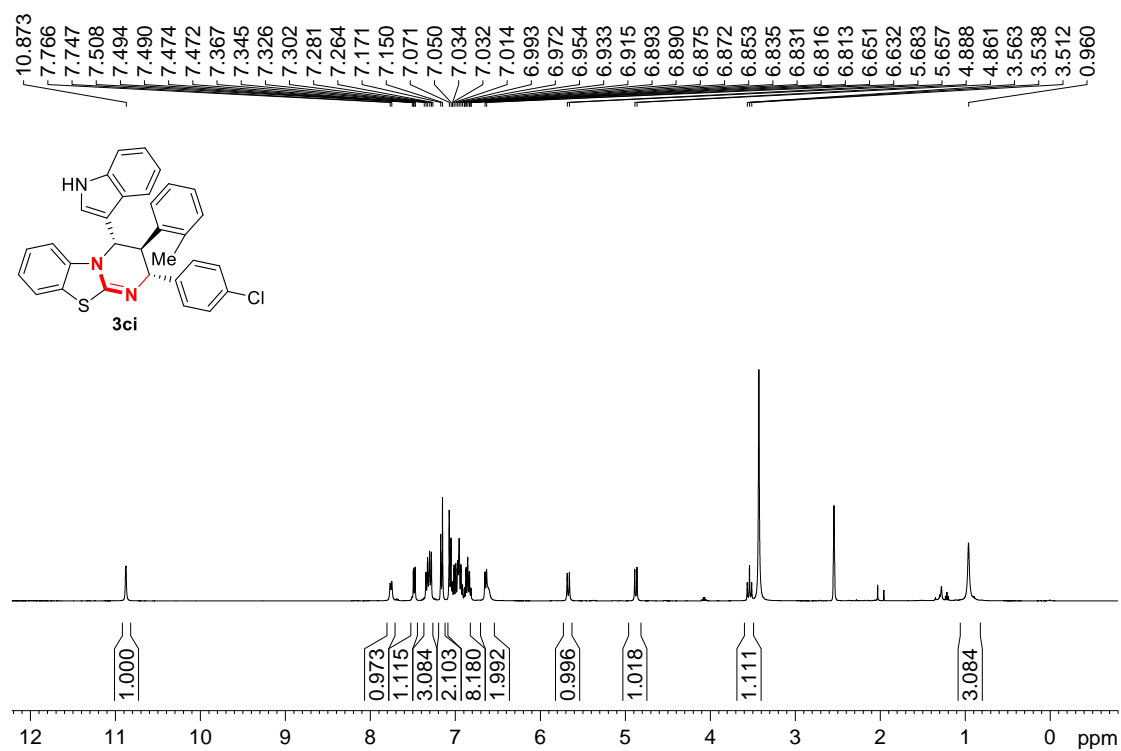

$^{13}\text{C}$  NMR spectrum of compound **3ci** ( $(\text{CD}_3)_2\text{SO}$ , 100 MHz)

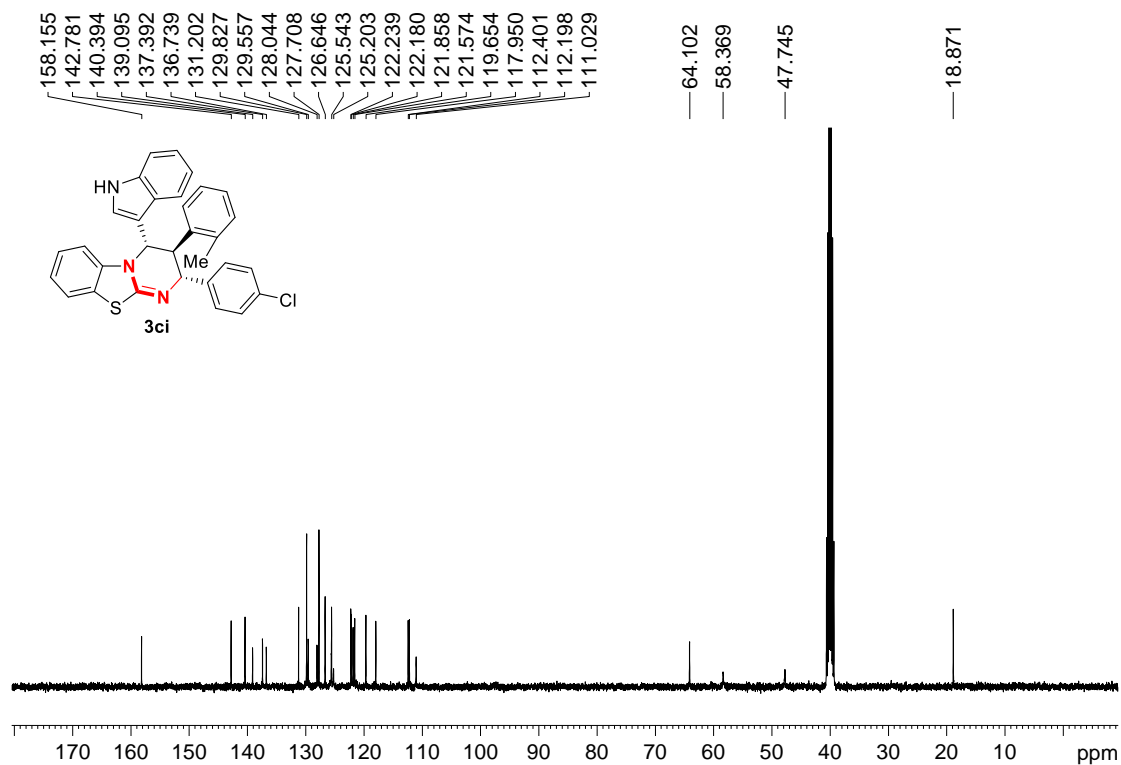

$^1\text{H}$  NMR spectrum of compound **3cj** ( $(\text{CD}_3)_2\text{SO}$ , 400 MHz)

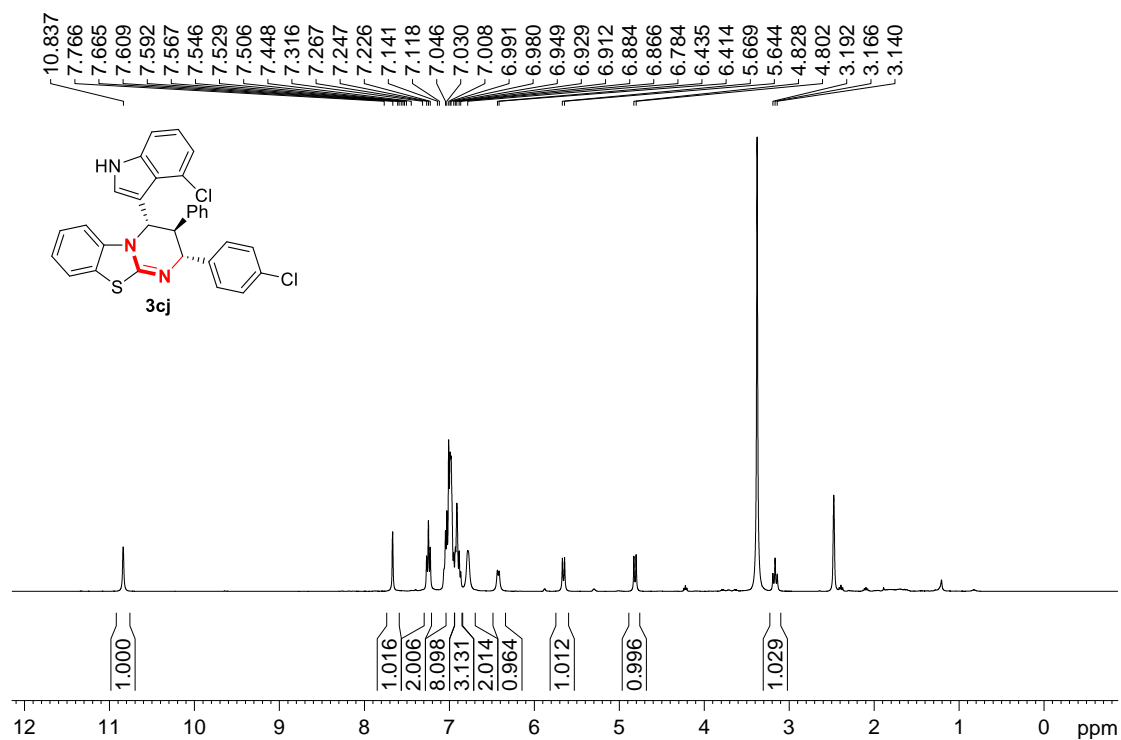

$^{13}\text{C}$  NMR spectrum of compound **3cj** ( $(\text{CD}_3)_2\text{SO}$ , 100 MHz)

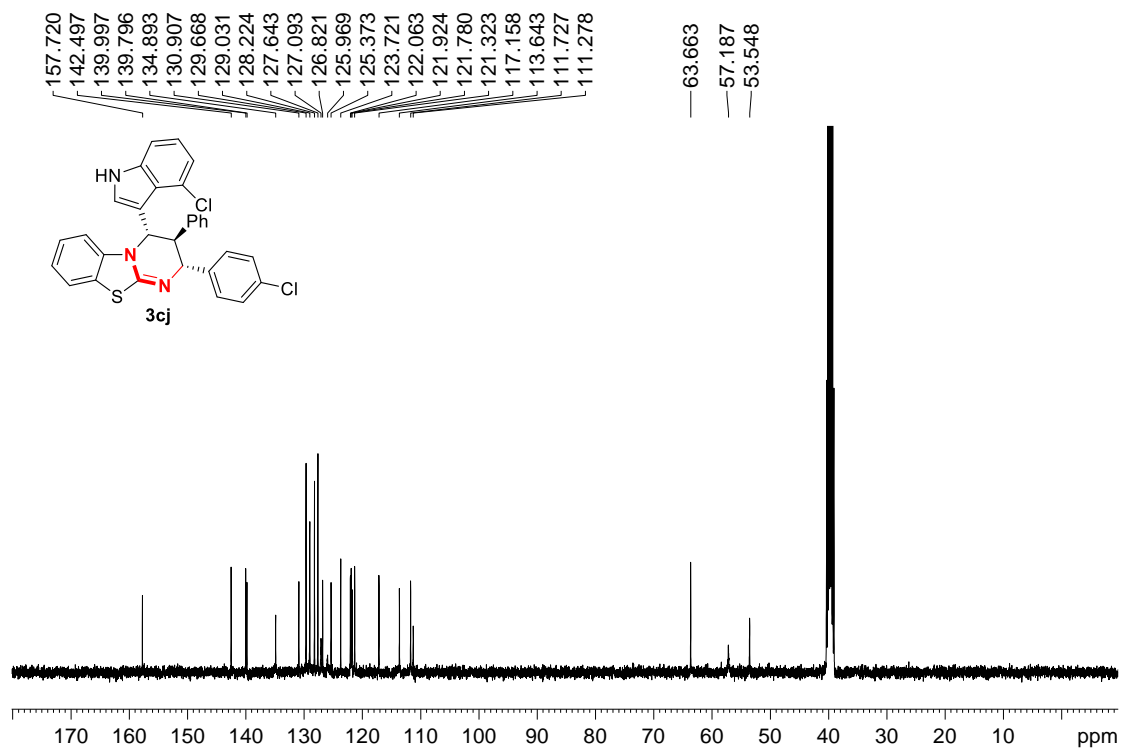

$^1\text{H}$  NMR spectrum of compound **3ck** ( $(\text{CD}_3)_2\text{SO}$ , 400 MHz)

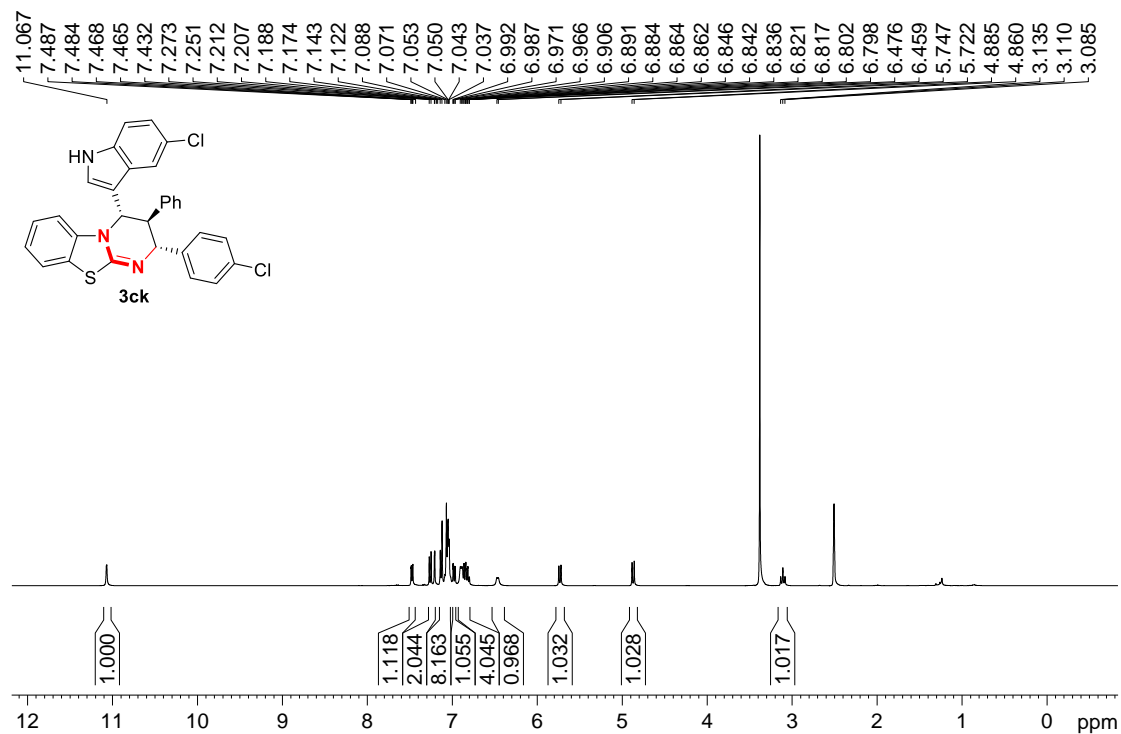

$^{13}\text{C}$  NMR spectrum of compound **3ck** ( $(\text{CD}_3)_2\text{SO}$ , 100 MHz)

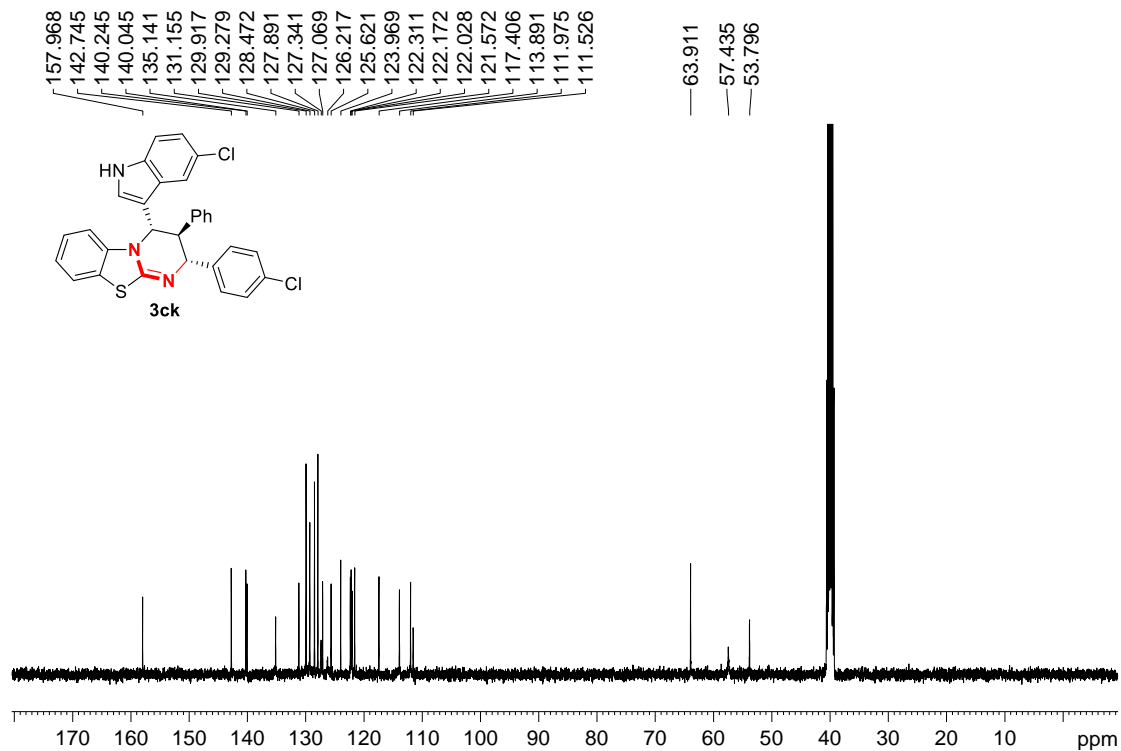

$^1\text{H}$  NMR spectrum of compound **3cl** ( $(\text{CD}_3)_2\text{SO}$ , 400 MHz)

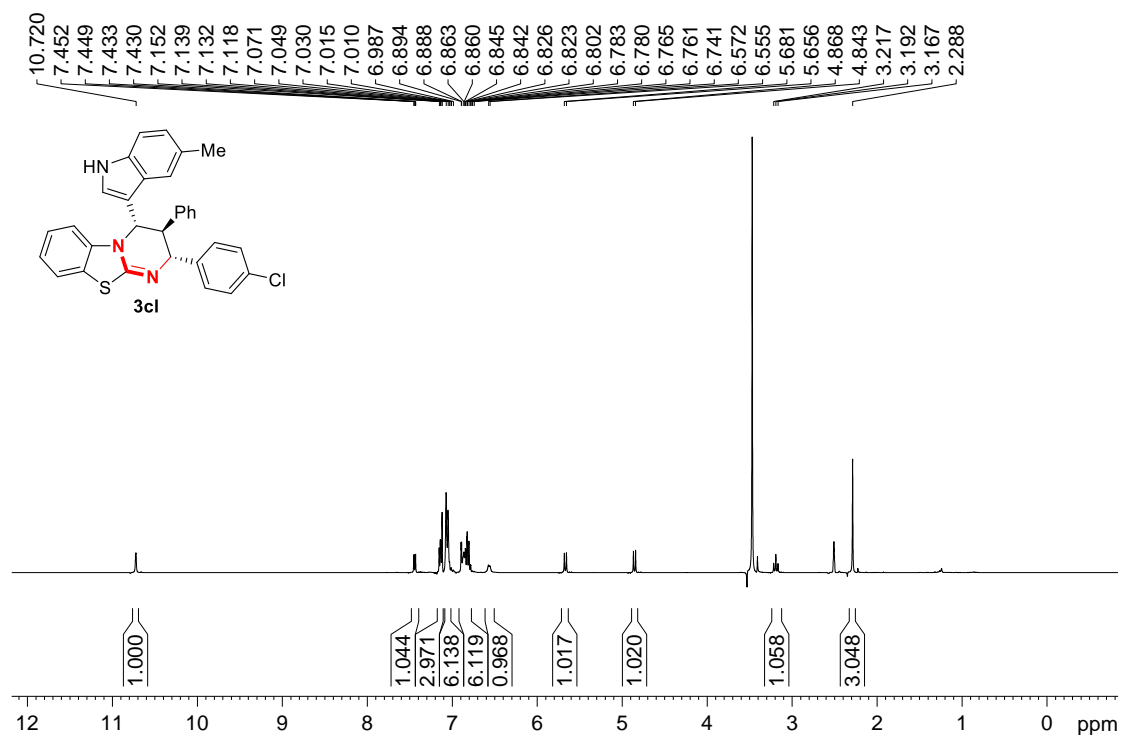

$^{13}\text{C}$  NMR spectrum of compound **3cl** ( $(\text{CD}_3)_2\text{SO}$ , 100 MHz)

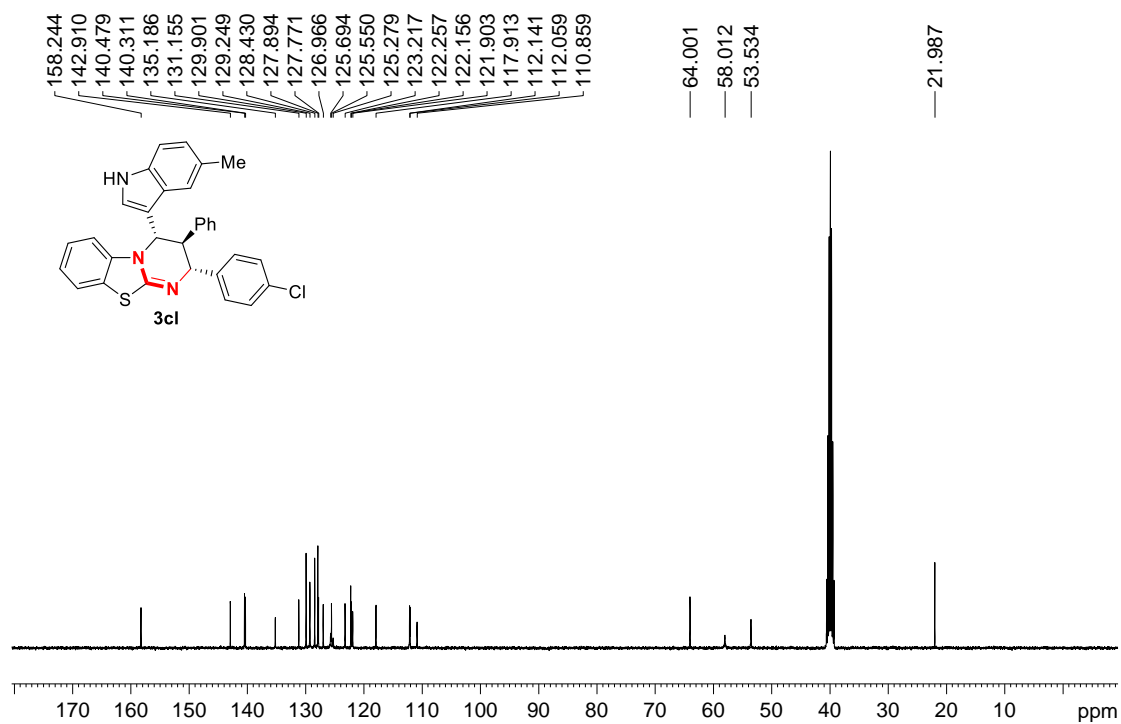

<sup>1</sup>H NMR spectrum of compound **3cm** ((CD<sub>3</sub>)<sub>2</sub>SO, 400 MHz)

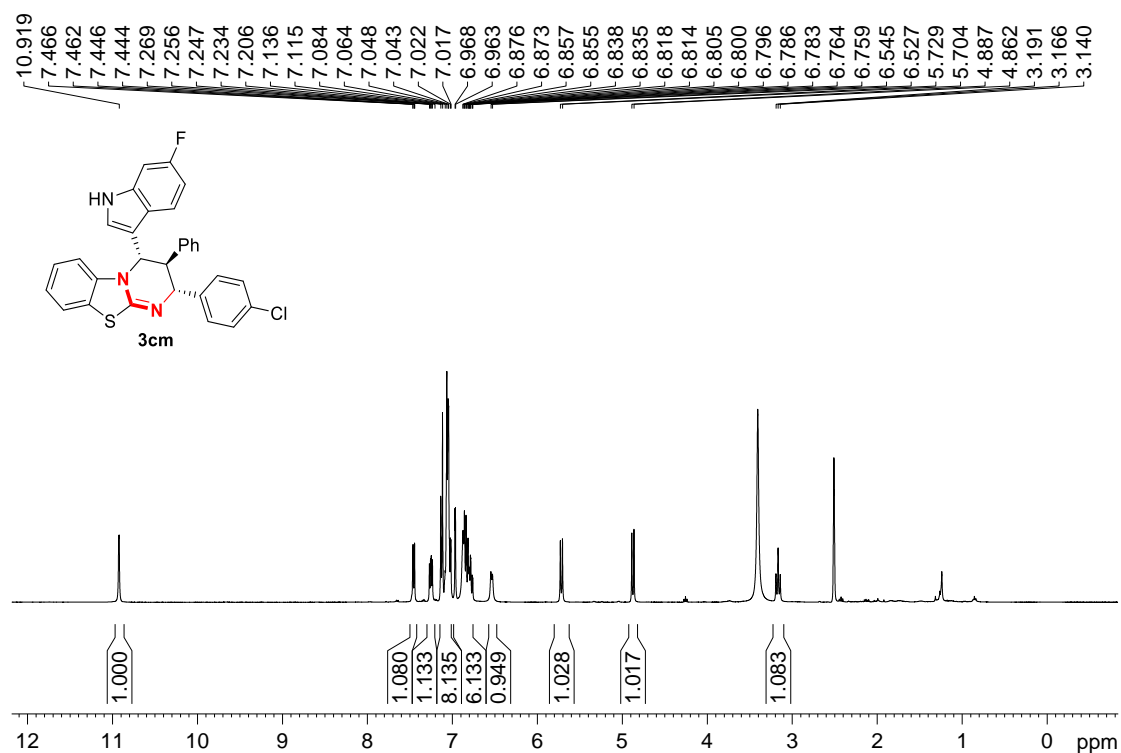

<sup>13</sup>C NMR spectrum of compound **3cm** ((CD<sub>3</sub>)<sub>2</sub>SO, 100 MHz)

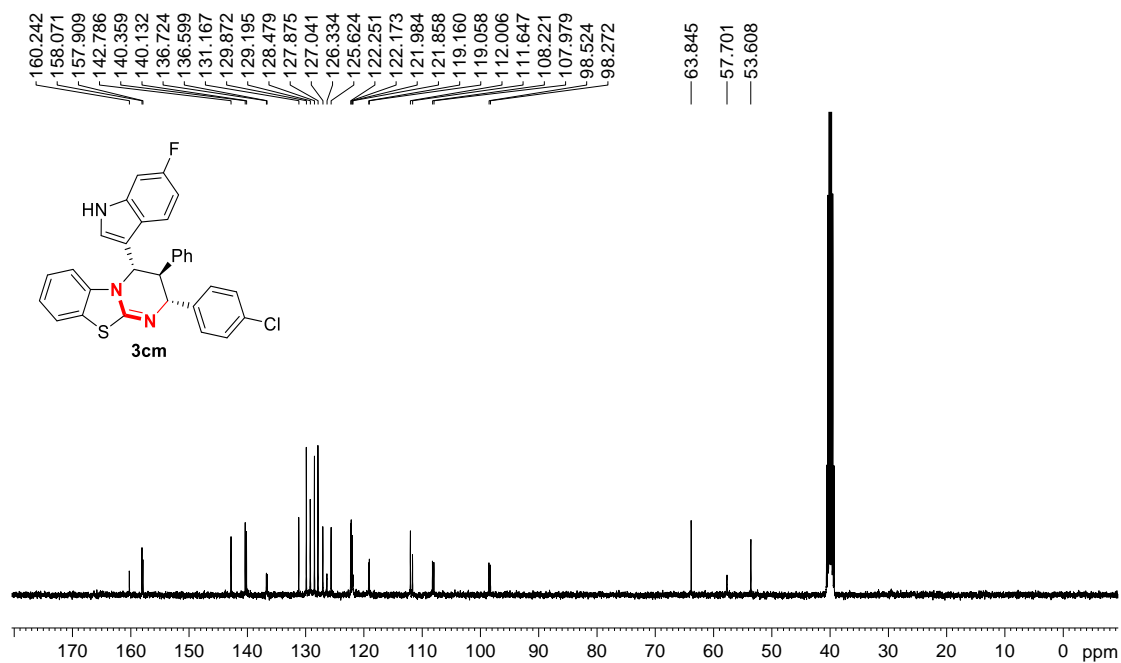

$^{19}\text{F}$  NMR spectrum of compound **3cm** ( $(\text{CD}_3)_2\text{SO}$ , 376 MHz)

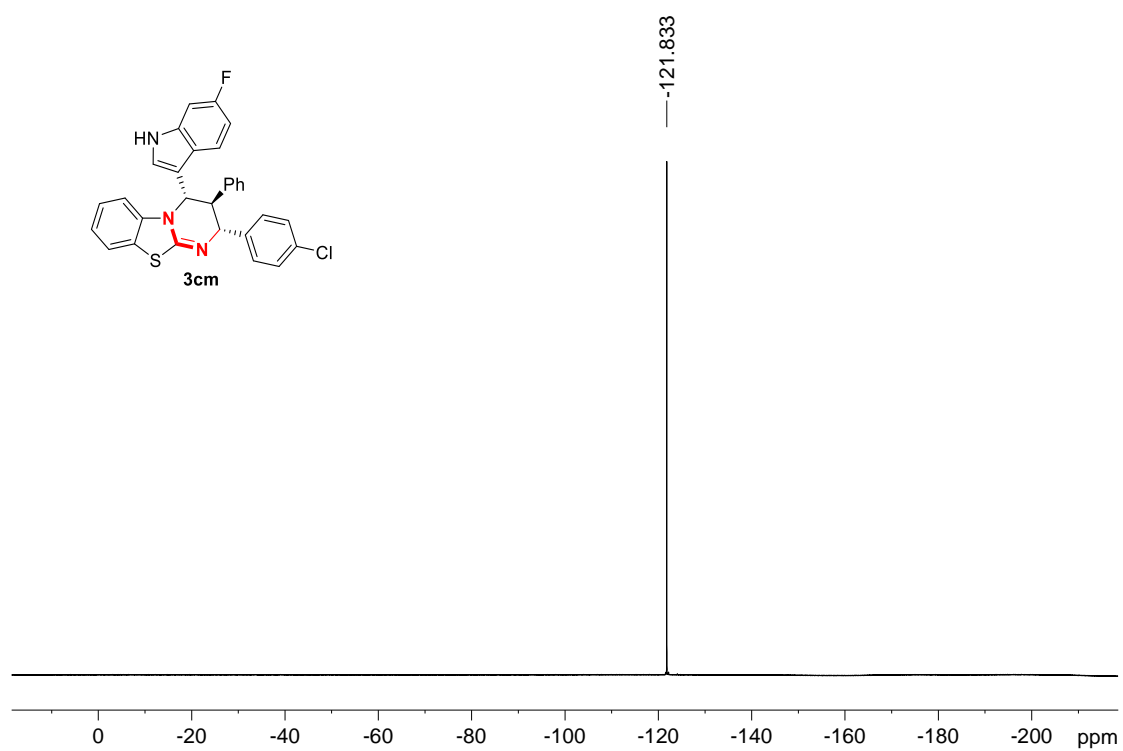

<sup>1</sup>H NMR spectrum of compound **3cn** ((CD<sub>3</sub>)<sub>2</sub>SO, 400 MHz)

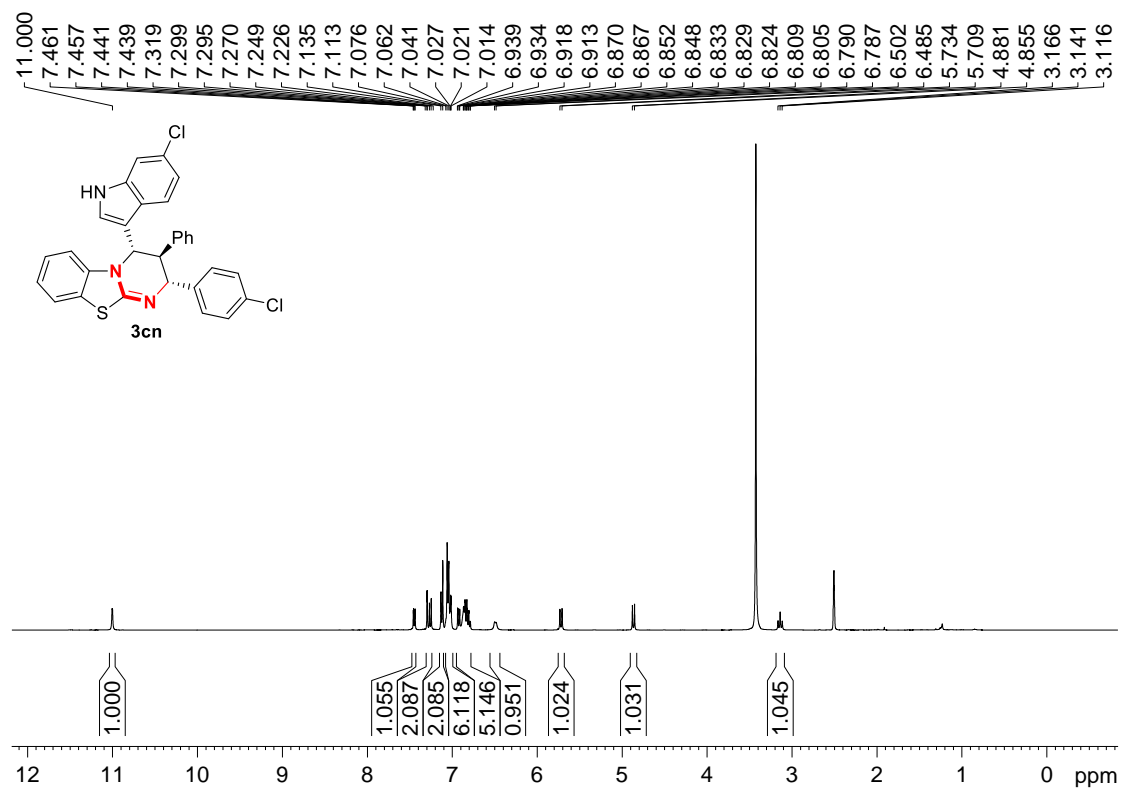

<sup>13</sup>C NMR spectrum of compound **3cn** ((CD<sub>3</sub>)<sub>2</sub>SO, 100 MHz)

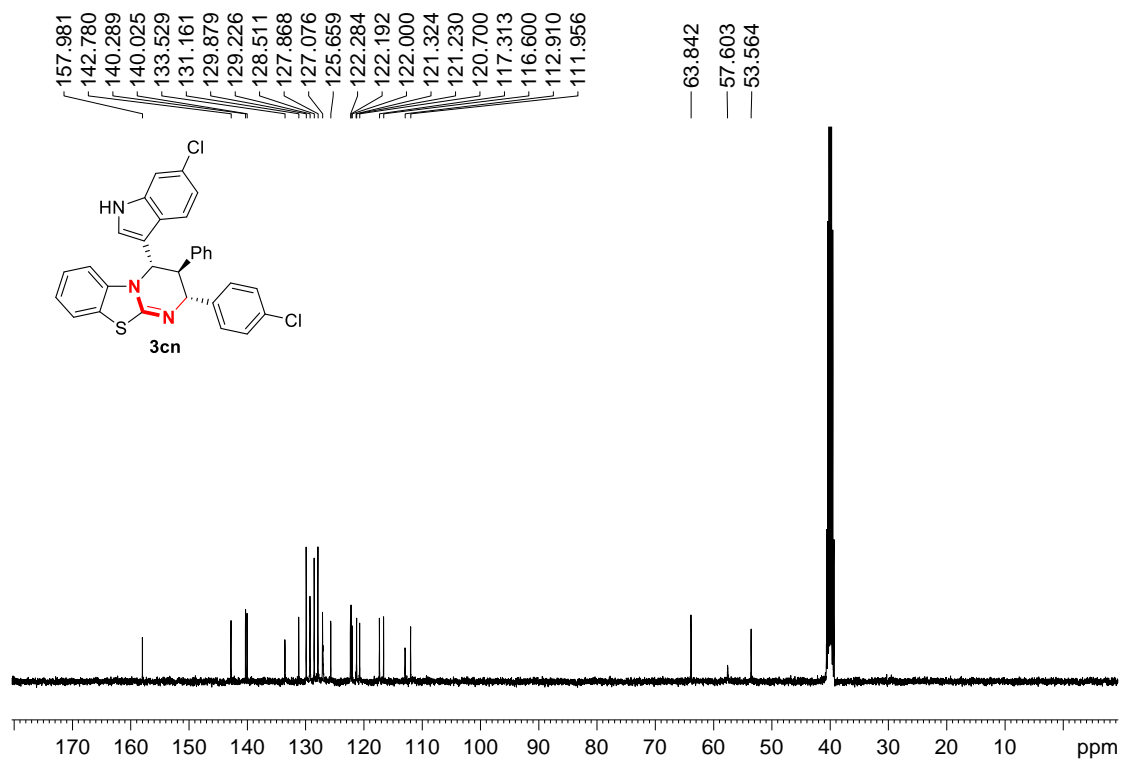

$^1\text{H}$  NMR spectrum of compound **3co** ( $(\text{CD}_3)_2\text{SO}$ , 400 MHz)

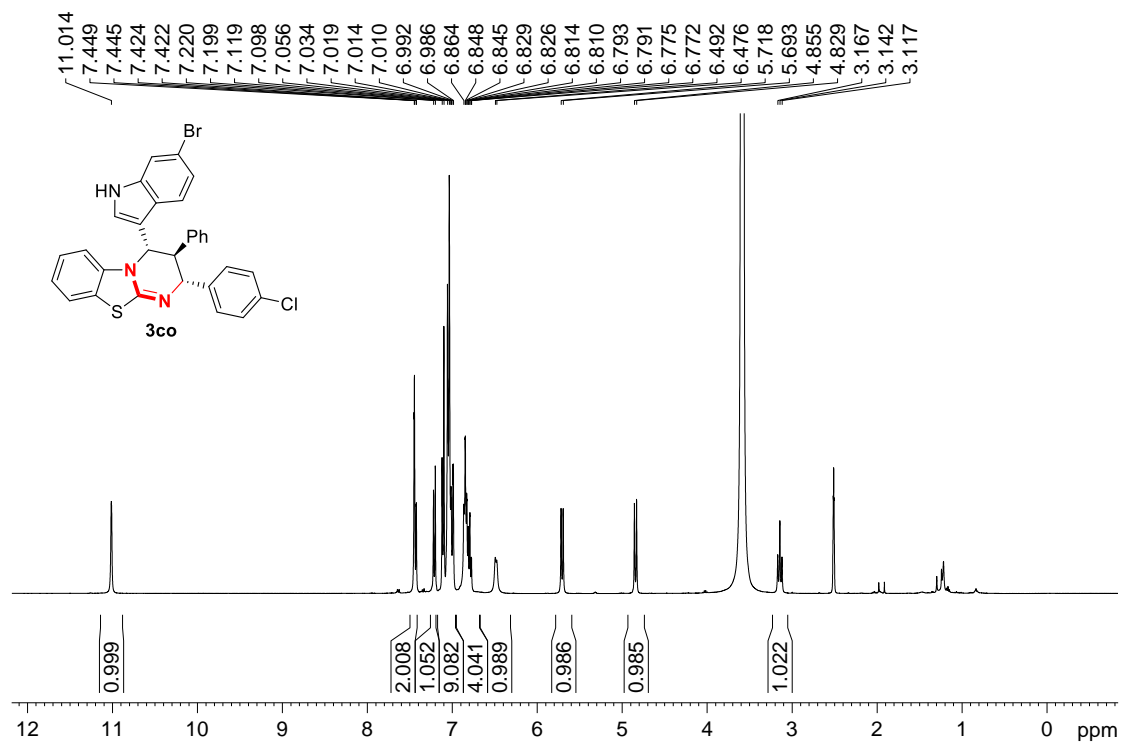

$^{13}\text{C}$  NMR spectrum of compound **3co** ( $(\text{CD}_3)_2\text{SO}$ , 100 MHz)

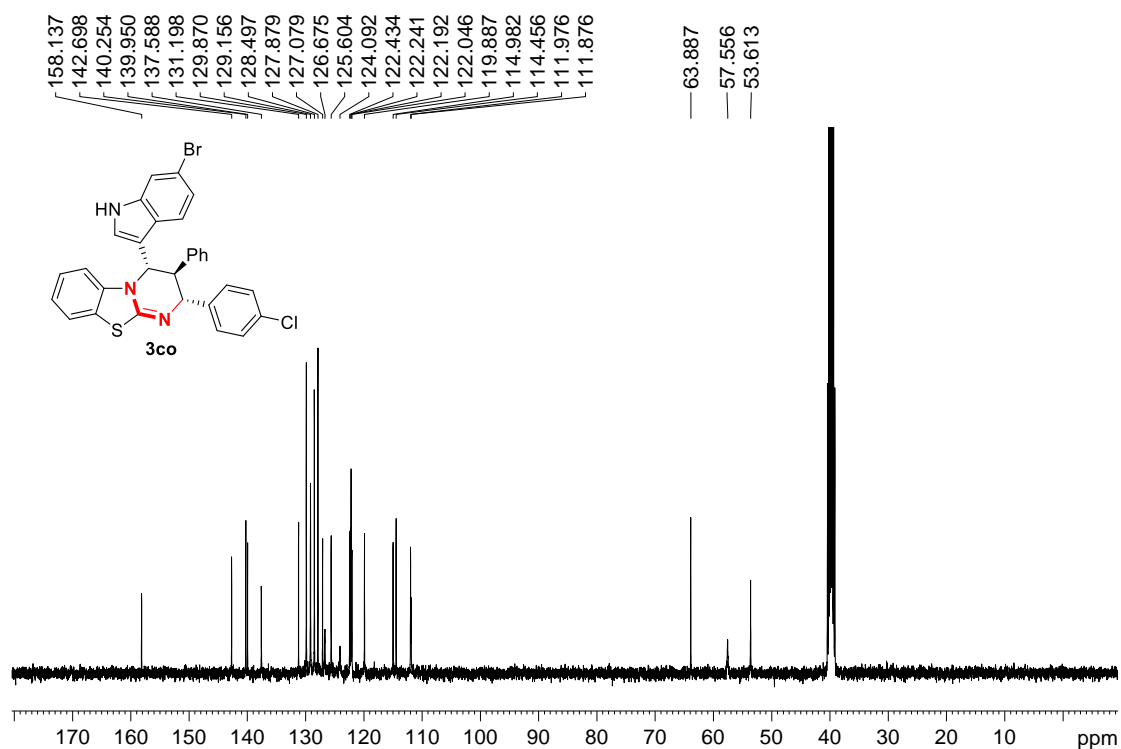



$^1\text{H}$  NMR spectrum of compound **3cp** ( $(\text{CD}_3)_2\text{SO}$ , 400 MHz)

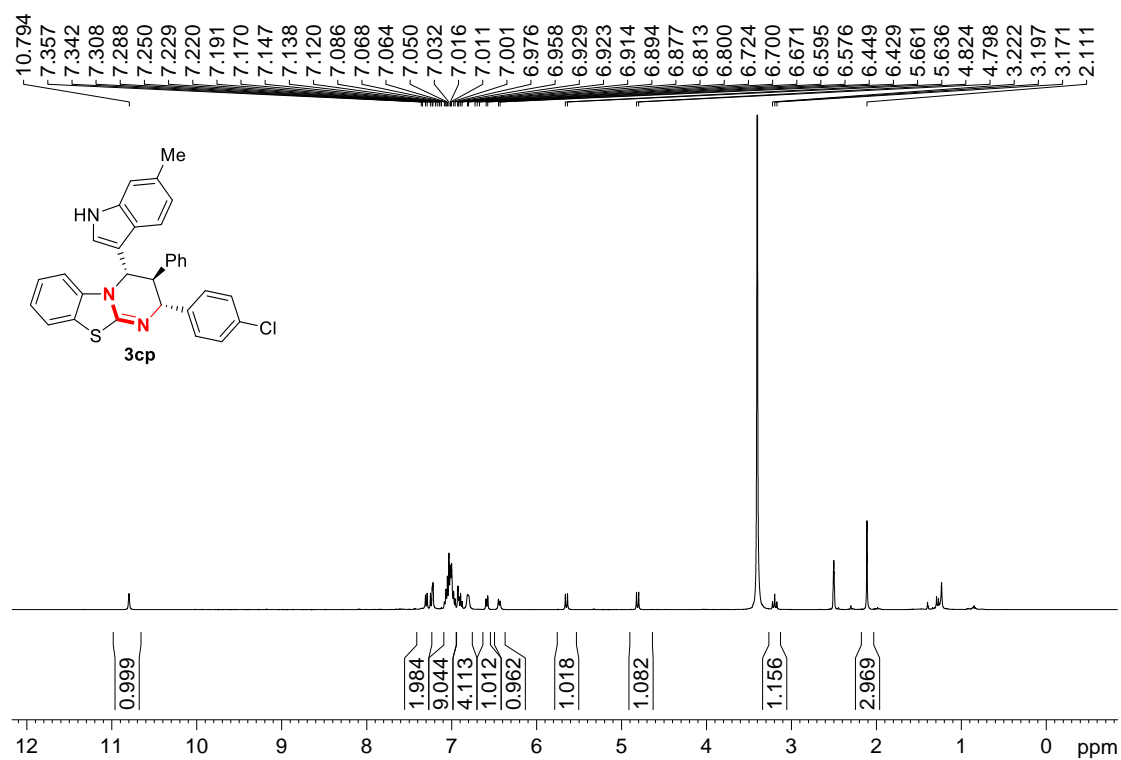

$^{13}\text{C}$  NMR spectrum of compound **3cp** ( $(\text{CD}_3)_2\text{SO}$ , 100 MHz)

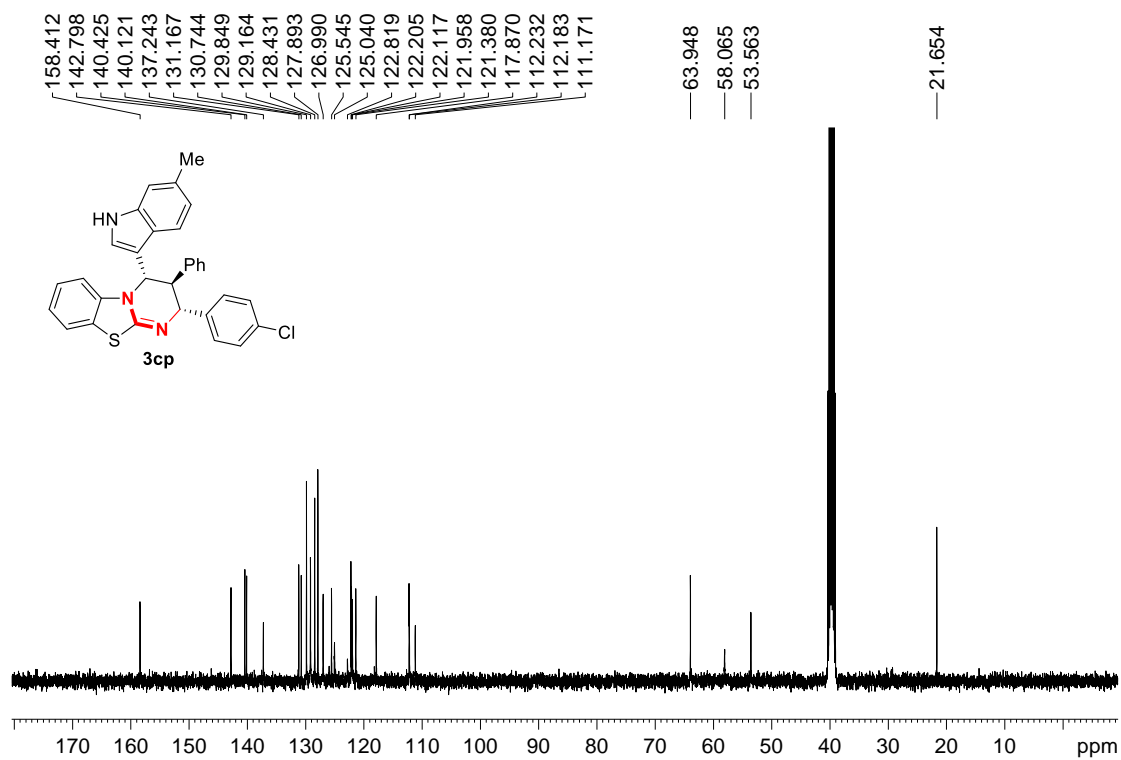

<sup>1</sup>H NMR spectrum of compound **3cq** ((CD<sub>3</sub>)<sub>2</sub>SO, 400 MHz)

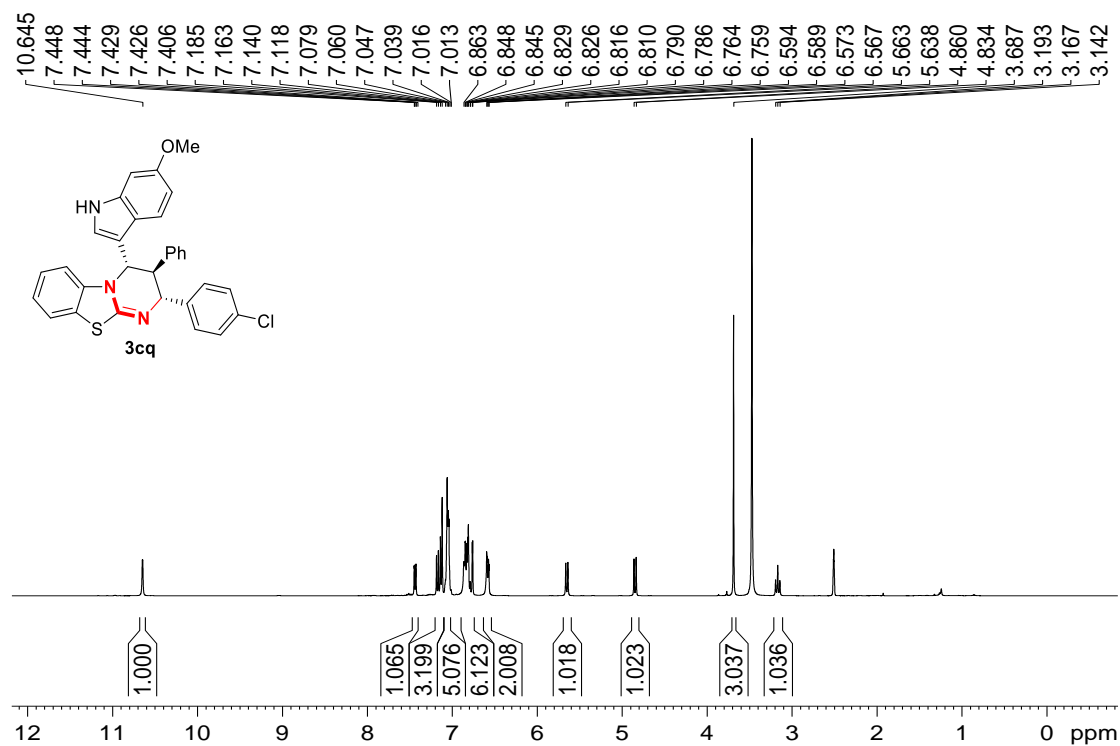

<sup>13</sup>C NMR spectrum of compound **3cq** ((CD<sub>3</sub>)<sub>2</sub>SO, 100 MHz)

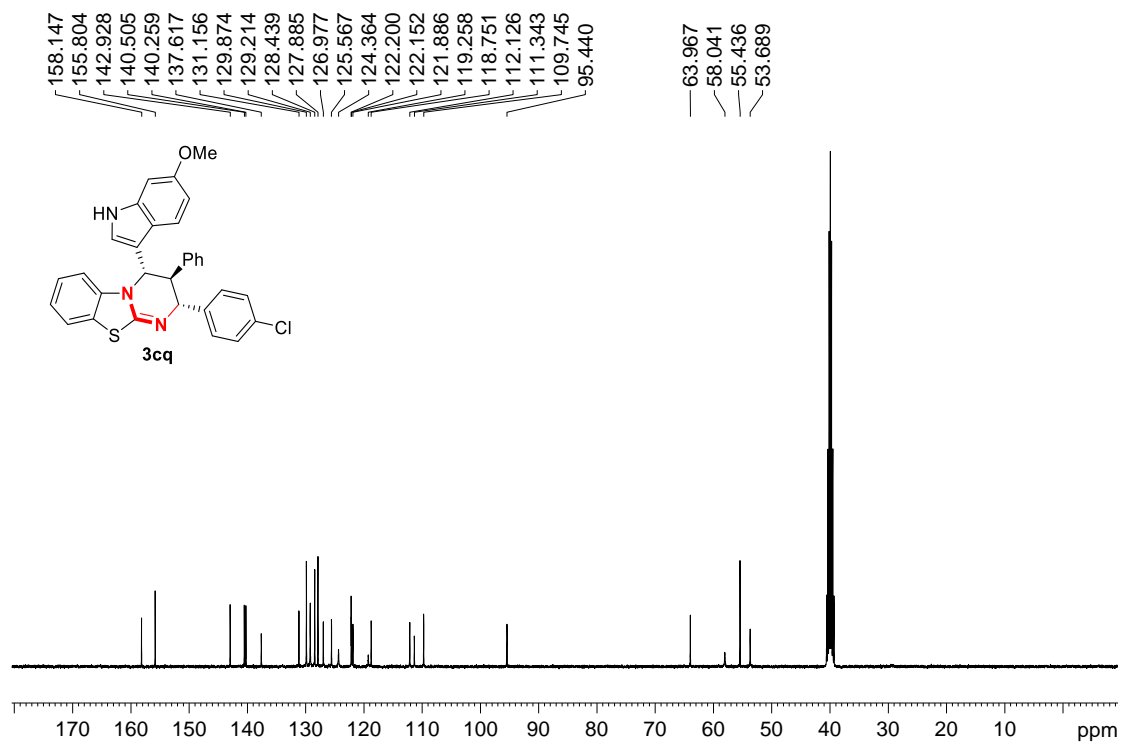

<sup>1</sup>H NMR spectrum of compound **3cr** ((CD<sub>3</sub>)<sub>2</sub>SO, 400 MHz)

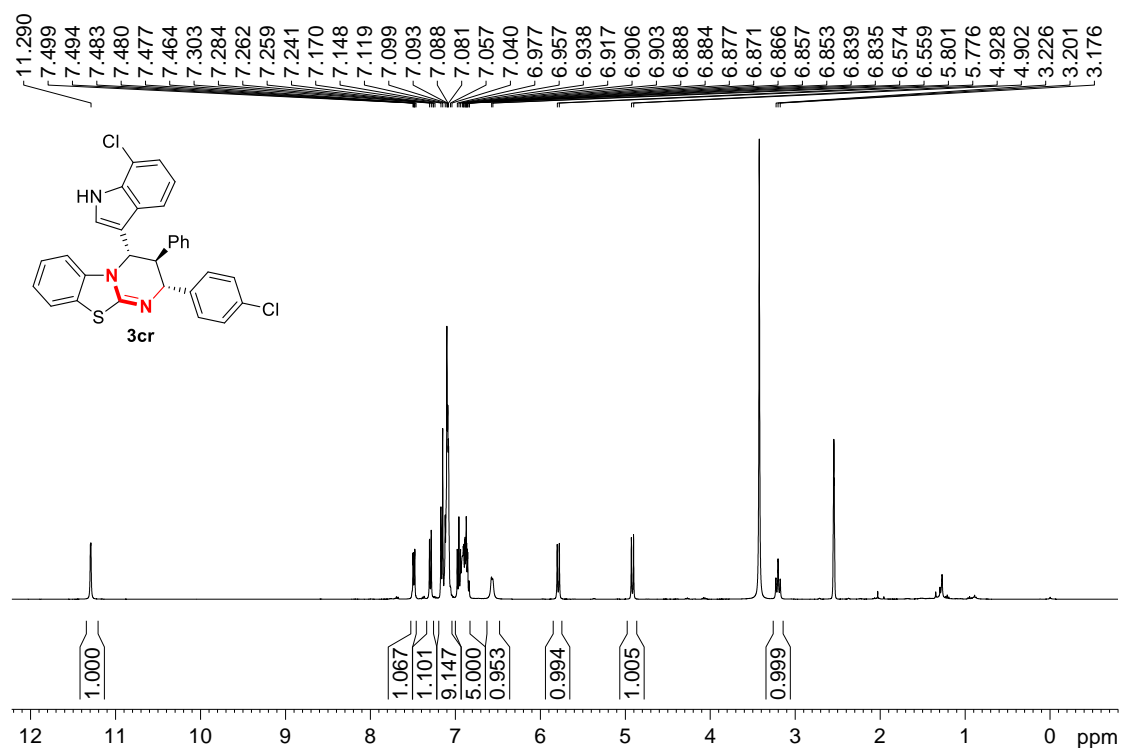

<sup>13</sup>C NMR spectrum of compound **3cr** ((CD<sub>3</sub>)<sub>2</sub>SO, 100 MHz)

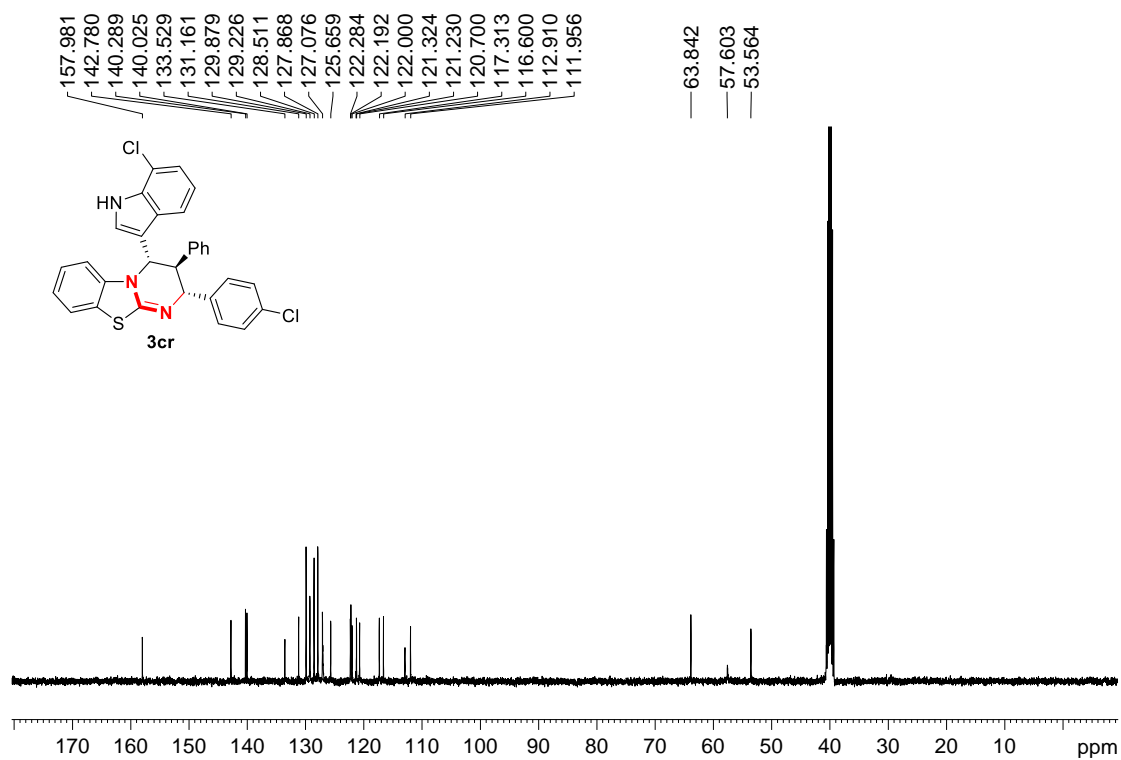

$^1\text{H}$  NMR spectrum of compound **3cs** ( $(\text{CD}_3)_2\text{SO}$ , 400 MHz)

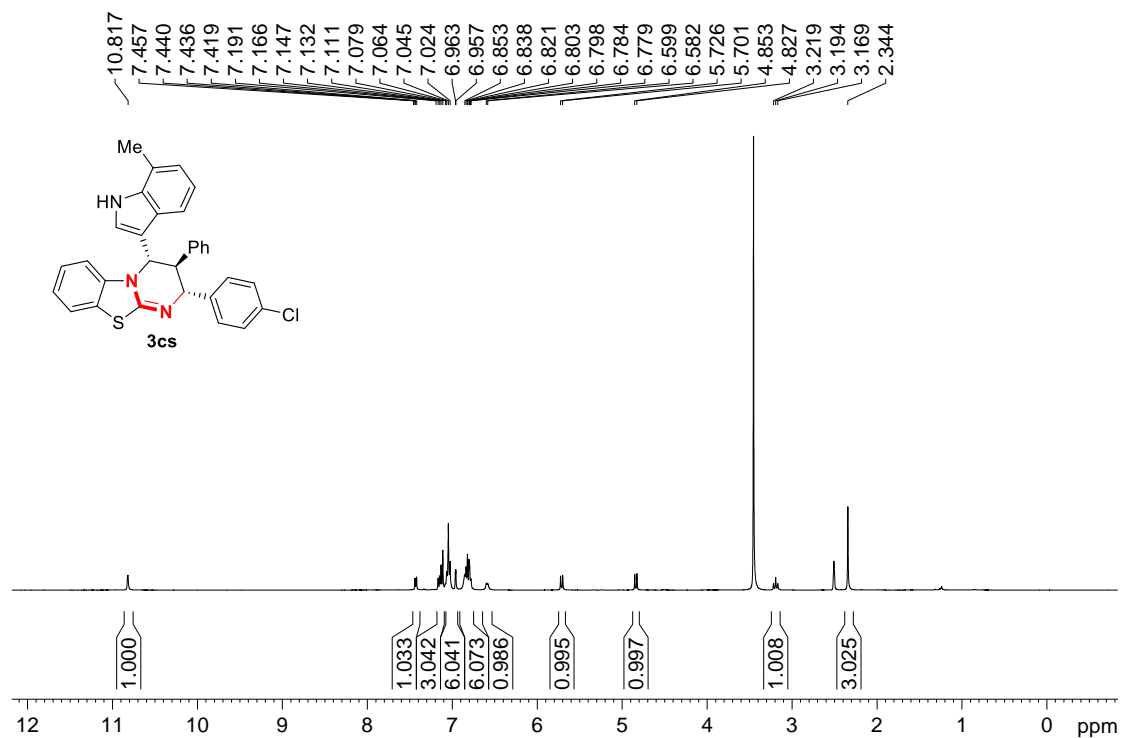

$^{13}\text{C}$  NMR spectrum of compound **3cs** ( $(\text{CD}_3)_2\text{SO}$ , 100 MHz)

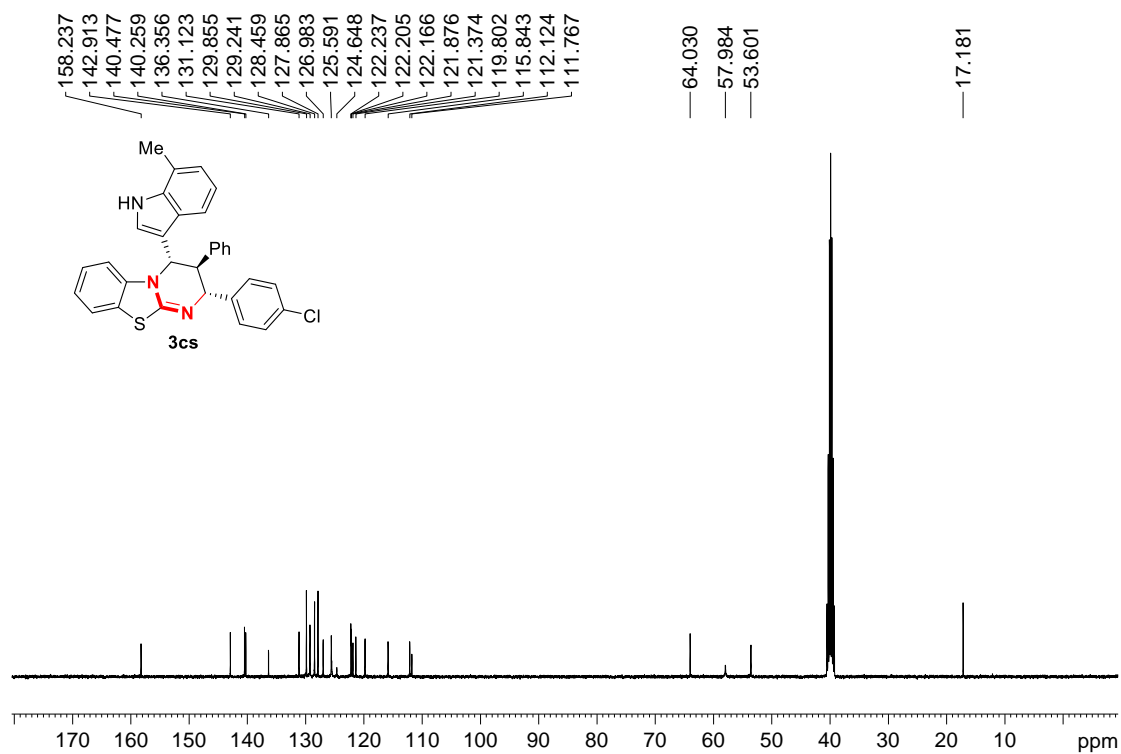

$^1\text{H}$  NMR spectrum of compound **3ct** ( $(\text{CD}_3)_2\text{SO}$ , 400 MHz)

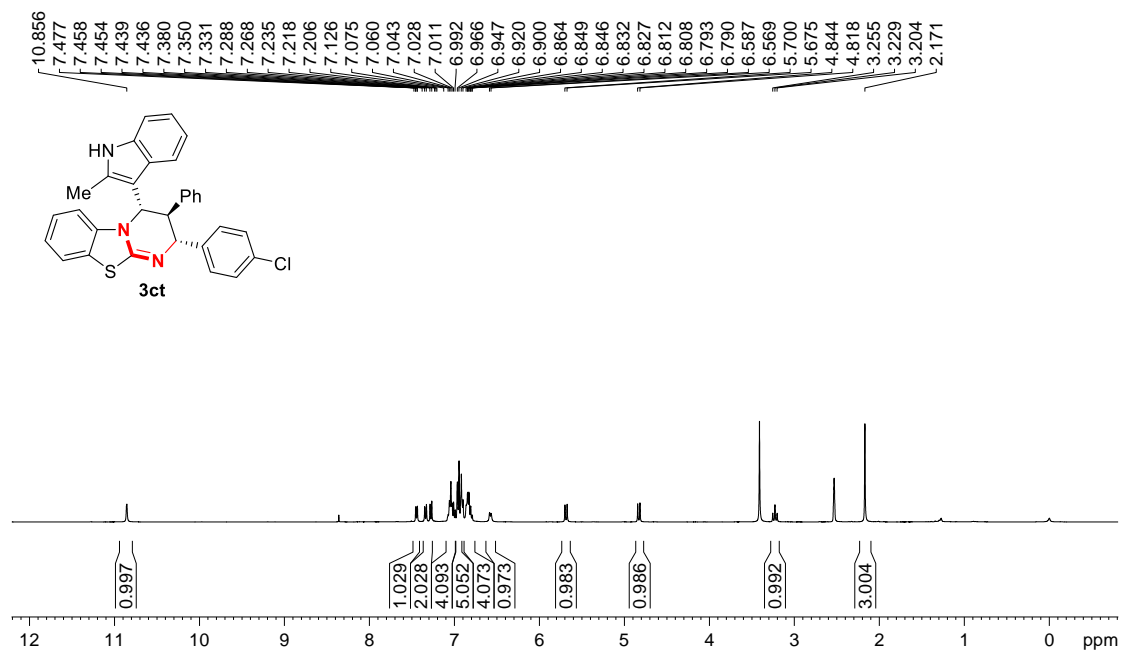

$^{13}\text{C}$  NMR spectrum of compound **3ct** ( $(\text{CD}_3)_2\text{SO}$ , 100 MHz)

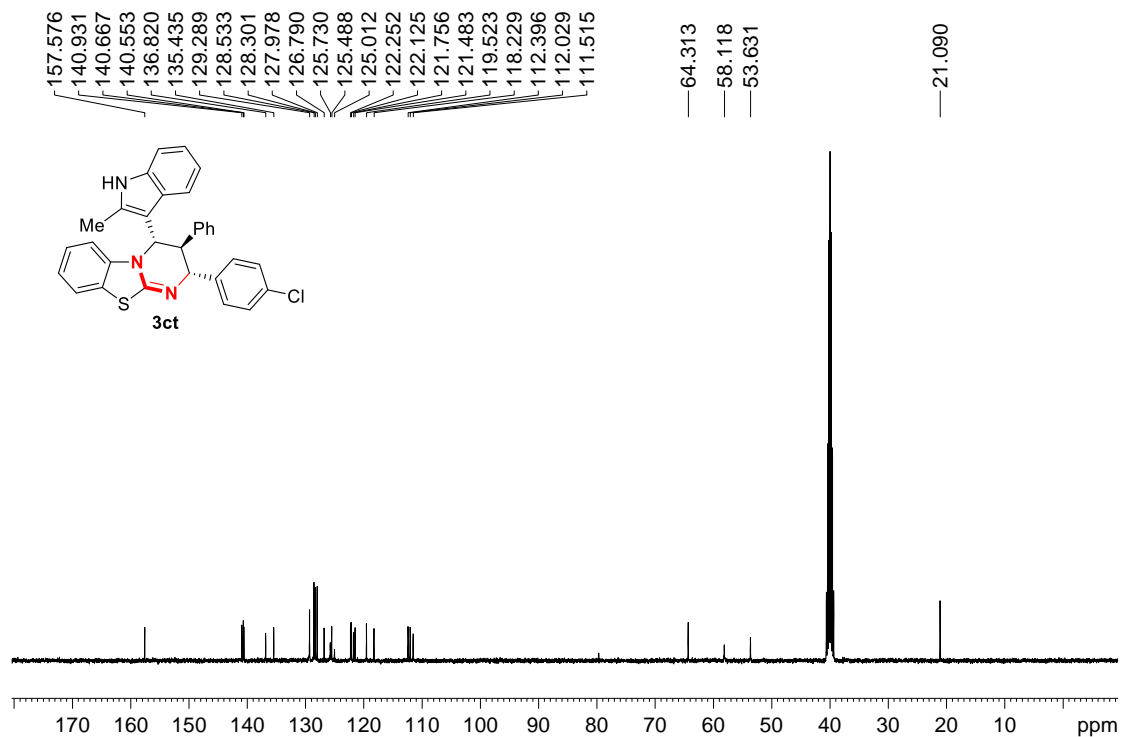

$^1\text{H}$  NMR spectrum of compound **4** ( $(\text{CD}_3)_2\text{SO}$ , 400 MHz)

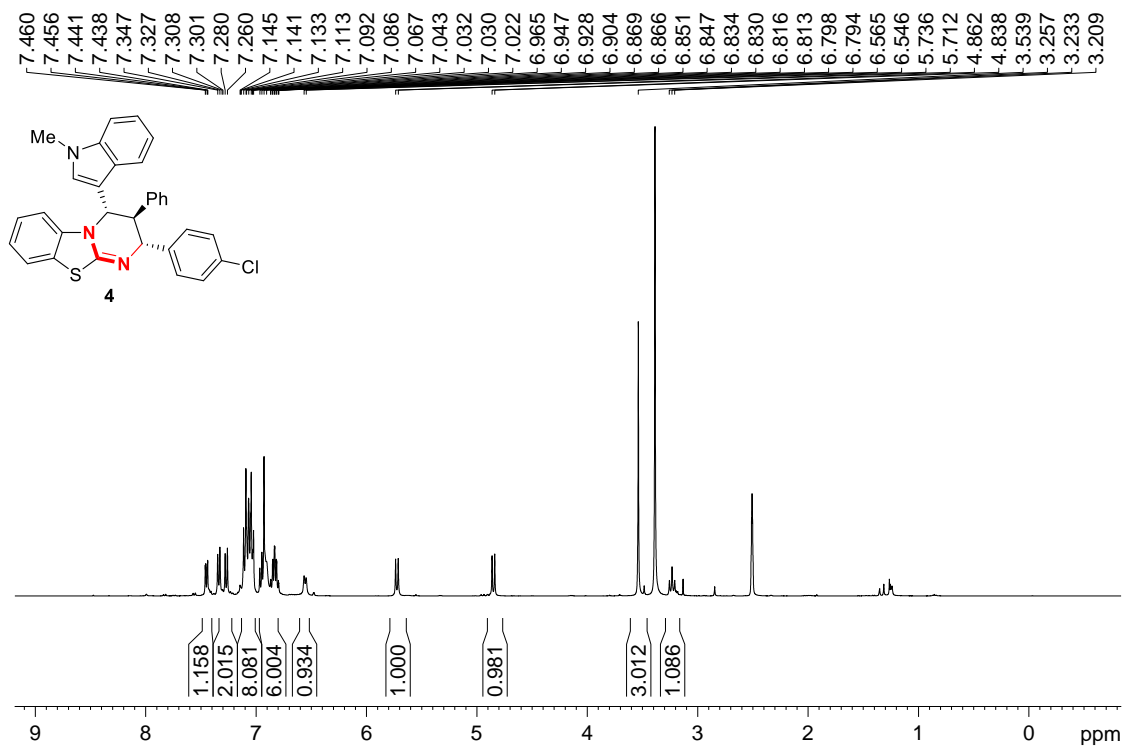

$^{13}\text{C}$  NMR spectrum of compound **4** ( $(\text{CD}_3)_2\text{SO}$ , 100 MHz)

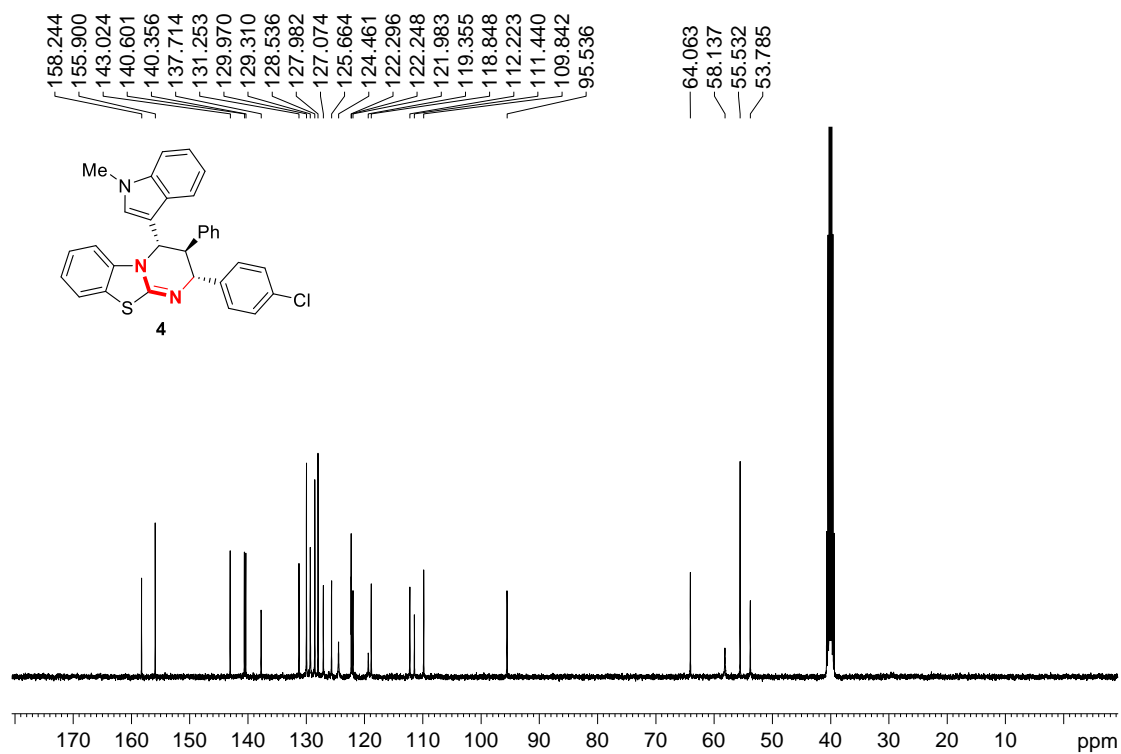

Supplement: d2cc02458f1.pdf [file d2cc02458f1.pdf]
